# Supplementary material for: Analysis of a Methanogen and an Actinobacterium Dominating the Thermophilic Microbial Community of an Electromethanogenic Biocathode
Source: Archaea. 2021 Mar 1;2021:8865133. doi: 10.1155/2021/8865133 (PMC7943316; doi:10.1155/2021/8865133)
Supplement: Supplementary Materials — Supplementary figures (characterization of the metagenome-sequenced biocathodes (Figure S1), genome maps of the two dominant species (Figure S2), whole genome alignment of the Methanothermobacter sp. strain EMTCatA1 and M. thermautotrophicus strain ∆H (Figure S3), phylogenetic tree of the Coriobacteriaceae sp. strain EMTCatB1 and other Actinobacteria (Figure S4), cyclic voltammograms of the biocathodes of the electromethanogenic reactors C1~C6 (Figure S5), representative scanning electron micrographs of the biocathode surfaces of the electromethanogenic reactors C1~C6 (Figure S6), current generation and CH4 production profiles of the biocathodes used for the transcriptome analysis (Figure S7), and taxonomic assignments of unmapped RNA-seq read (Figure S8)) and tables (details on probes and primers (Table S1), RNA sequencing and mapping (Tables S2 and S3), TPM- (Tables S4 and S5) and TMM- (Tables S6 and S7) normalized read counts and differentially expressed gene clusters (Tables S8 and S10) of the transcriptomes of the dominant species, c-type cytochromes of the Coriobacteriaceae sp. strain EMTCatB1 (Table S9), and genes of the Methanothermobacter sp. strain EMTCatA1 not present in the M. thermautotrophicus strain ∆H (Table S11)) are available online. [file 8865133.f1.zip]

Archive with 2 entries (2 files):
- Supporting_Information_Kobayashi_et_al/Supplemental_Tables_Kobayashi_et_al.xlsx
- Supporting_Information_Kobayashi_et_al/Supporting_Information_Kobayashi_et_al.docx
