# Supplementary material for: Analysis of a Methanogen and an Actinobacterium Dominating the Thermophilic Microbial Community of an Electromethanogenic Biocathode
Source: Archaea. 2021 Mar 1;2021:8865133. doi: 10.1155/2021/8865133 (PMC7943316; doi:10.1155/2021/8865133)
Supplement: Supplementary Materials — Supplementary figures (characterization of the metagenome-sequenced biocathodes (Figure S1), genome maps of the two dominant species (Figure S2), whole genome alignment of the Methanothermobacter sp. strain EMTCatA1 and M. thermautotrophicus strain ∆H (Figure S3), phylogenetic tree of the Coriobacteriaceae sp. strain EMTCatB1 and other Actinobacteria (Figure S4), cyclic voltammograms of the biocathodes of the electromethanogenic reactors C1~C6 (Figure S5), representative scanning electron micrographs of the biocathode surfaces of the electromethanogenic reactors C1~C6 (Figure S6), current generation and CH4 production profiles of the biocathodes used for the transcriptome analysis (Figure S7), and taxonomic assignments of unmapped RNA-seq read (Figure S8)) and tables (details on probes and primers (Table S1), RNA sequencing and mapping (Tables S2 and S3), TPM- (Tables S4 and S5) and TMM- (Tables S6 and S7) normalized read counts and differentially expressed gene clusters (Tables S8 and S10) of the transcriptomes of the dominant species, c-type cytochromes of the Coriobacteriaceae sp. strain EMTCatB1 (Table S9), and genes of the Methanothermobacter sp. strain EMTCatA1 not present in the M. thermautotrophicus strain ∆H (Table S11)) are available online. [file 8865133.f1.zip › Supporting_Information_Kobayashi_et_al/Supplemental_Tables_Kobayashi_et_al.xlsx]

## Sheet: Table S1
Table S1. Primers and probes used in this study.
Name	Sequence (5' → 3')	Target	Reference
Probes for FISH (Alexa 488-labeled)
MB311	ACCTTGTCTCAGGTTCCATCTCC	Methanobacteriales	Crocetti et al., 2006
B1_648	TTCCTCTACCAGACTCGAGGCT	Coriobacteriaceae sp. strain EMTCatB1	This study
Primers and probes for qPCR (for TaqMan assay)
ARC787F	ATTAGATACCCSBGTAGTCC	Archaea	Yu et al., 2005
ARC915P	AGGAATTGGCGGGGGAGCAC
ARC1059R	GCCATGCACCWCCTCT
MBT857F	CGWAGGGAAGCTGTTAAGT	Methanobacteriales	Yu et al., 2005
MBT929P	AGCACCACAACGCGTGGA
MBT1196R	TACCGTCGTCCACTCCTT
BAC338F	ACTCCTACGGGAGGCAG	Bacteria	Yu et al., 2005
BAC516P	TGCCAGCAGCCGCGGTAATAC
BAC805R	GACTACCAGGGTATCTAATCC
COB554F	AGGCGGGCTGTTAAGTCAG	Coriobacteriaceae sp. strain EMTCatB1	This study
COB709P	TCTGGGCCACGACTGACGCTGAGG
COB776R	GCCCATCGTTTACGGCTAGG

## Sheet: Table S2
Table S2. Overview of RNA Sequencing
Sample	Total Reads	Called Bases (Mbp)	%Q30
CC1	51723940	5172	96.2
CC2	69527098	6952	96.6
BrES1	78947000	7895	96
BrES2	93433214	9343	95.9
OC1	108394198	10830	95.9
OC2	89515420	8952	95.9

## Sheet: Table S3
Table S3. Mapping of RNA-seq reads onto the genome of the dominant species
Sample	Total reads (M)	Cleaned reads (M)	Target species*	Read mapped (M)	Reads unmapped (M)	Mapped rate (%)
CC1	51.7	48.8	Methanothermobacter sp. strain EMTCatA1	7.9	40.9	16.3
			Coriobacteriaceae sp. strain EMTCatB1	33.2	15.6	67.9
CC2	69.5	65.7	Methanothermobacter sp. strain EMTCatA1	23.4	42.3	35.7
			Coriobacteriaceae sp. strain EMTCatB1	22.1	43.6	33.6
BrES1	78.9	73.1	Methanothermobacter sp. strain EMTCatA1	14.8	58.3	20.3
			Coriobacteriaceae sp. strain EMTCatB1	45.3	27.7	62
BrES2	93.4	86.2	Methanothermobacter sp. strain EMTCatA1	34.3	51.9	39.7
			Coriobacteriaceae sp. strain EMTCatB1	45	41.2	52.2
OC1	108.3	100	Methanothermobacter sp. strain EMTCatA1	35.8	64.2	35.8
			Coriobacteriaceae sp. strain EMTCatB1	45	55	45
OC2	89.5	82.7	Methanothermobacter sp. strain EMTCatA1	28.3	54.4	34.2
			Coriobacteriaceae sp. strain EMTCatB1	38.9	43.9	47
			*Alignemt of the reads to each genome was done separately to simplify downstream analyses.

## Sheet: Table S4
Table S4. TPM normalized read counts of Methanothermobacter sp. strain EMTCatA1 transcriptomes sorted by expression levels under the CC condition. CDS of top 10% abundant transcripts in CC condition are coded in red. Cells highlighted with light green are methanogenesis-related genes. *Mean value of biological replicates.
CDS	Gene name	Annotated gene product	TPM normalized read counts*			TPM normalized read counts of each replicates
			CC	BrES	OC	CC1	CC2	BrES1	BrES2	OC1	OC2
tca_00610	tca_00610	hypothetical protein	66087.8	18082.3	10194.4	125547	6628.43	20959.9	15204.7	9818.05	10570.7
tca_01429	tca_01429	hypothetical protein	28970	41442.5	26911.7	28340.1	29599.9	23850	59035	27062.1	26761.3
tca_00605	tca_00605	hypothetical protein	21532.7	51965.4	54125.7	17522.4	25542.9	58362.9	45567.9	54524.6	53726.7
tca_01835	tca_01835	hypothetical protein	19930	23444.6	37261.1	23815.7	16044.4	11078	35811.3	36938.9	37583.2
tca_01836	tca_01836	hypothetical protein	16562.4	58797.2	75274.9	15837	17287.8	29691.6	87902.8	73969.9	76579.9
tca_01642	tca_01642	hypothetical protein	16173.7	26220.6	51664.4	25325.2	7022.09	24895.2	27545.9	50269	53059.8
tca_00606	tca_00606	hypothetical protein	11830.3	21476.3	15130.3	7974.43	15686.2	19341.3	23611.3	15174.2	15086.5
tca_00599	tca_00599	hypothetical protein	10353.9	3043.73	2535.92	17903.1	2804.7	1064.34	5023.12	2563.8	2508.04
tca_00204	tca_00204	hypothetical protein	10261.1	2079.72	1511.13	10448.6	10073.6	1273.08	2886.36	1488.31	1533.95
tca_01500	mobB	Molybdopterin-guanine dinucleotide biosynthesis adapter protein	8983.69	2340.45	1001.61	16962.8	1004.58	2353.82	2327.09	932.971	1070.25
tca_01401	tca_01401	hypothetical protein	7794.2	49.2918	21.8958	3955.11	11633.3	67.4523	31.1313	11.3666	32.4249
tca_00234	tca_00234	hypothetical protein	7670.71	4238.6	8080.92	10687	4654.46	2988.93	5488.27	8270.46	7891.38
tca_01239	tca_01239	hypothetical protein	7617.66	4009.63	5071.75	9881.36	5353.96	159.356	7859.91	4967.92	5175.59
tca_00251	tca_00251	hypothetical protein	7502.71	1676.24	6431.45	6560.58	8444.85	1249.77	2102.72	6444.4	6418.5
tca_01772	tca_01772	hypothetical protein	7197.31	23708.4	21260.4	9607.28	4787.34	23543.5	23873.4	21012.2	21508.5
tca_00673	tca_00673	hypothetical protein	6728.91	2148.54	4657.41	2493.8	10964	2005	2292.07	4542.94	4771.87
tca_01121	mcrA	Methyl-coenzyme M reductase subunit alpha	6369.69	6739.08	3363.13	6232.05	6507.33	6122.71	7355.45	3419.88	3306.37
tca_01004	tca_01004	hypothetical protein	6326.36	3170.81	840.526	6434	6218.71	1353.85	4987.77	870.246	810.807
tca_00064	tca_00064	hypothetical protein	6035.39	358.065	333.94	9059.71	3011.07	142.249	573.882	324.15	343.729
tca_00378	tca_00378	hypothetical protein	5643.79	3248.28	388.446	9293.62	1993.96	4111.73	2384.84	330.75	446.142
tca_00259	tca_00259	hypothetical protein	5594.62	1909.27	2631.63	5135.12	6054.11	2077.17	1741.38	2709.21	2554.04
tca_01489	tca_01489	hypothetical protein	5255.56	5477.63	6633.37	3934.45	6576.67	6879.04	4076.23	6791.37	6475.37
tca_00223	tca_00223	hypothetical protein	4917.28	3501.48	1668.92	6601.69	3232.86	2633.75	4369.2	1606.01	1731.84
tca_00101	tca_00101	hypothetical protein	4848.02	2593.68	1821.7	6300.18	3395.86	1719.14	3468.23	1838.67	1804.72
tca_01450	tca_01450	hypothetical protein	4645.59	1351.54	1519.74	5547.43	3743.75	1079.72	1623.36	1597.51	1441.96
tca_01481	tca_01481	hypothetical protein	4605.41	2897.61	3133.46	5484.39	3726.42	1067.89	4727.34	3102.11	3164.81
tca_00579	rpiA	Ribose-5-phosphate isomerase A	4426.35	909.074	2073.24	4850.89	4001.8	522.68	1295.47	2193.7	1952.78
tca_01113	mtrH	Tetrahydromethanopterin S-methyltransferase subunit H	4410.93	1943.66	843.112	3710.18	5111.68	1367.96	2519.35	822.507	863.717
tca_01400	tca_01400	hypothetical protein	4389.43	2527.77	3486.87	2191.91	6586.95	2642.09	2413.46	3430.15	3543.6
tca_00421	tca_00421	hypothetical protein	4355.82	305.306	205.296	3459.69	5251.95	360.326	250.287	204.599	205.994
tca_01771	tca_01771	hypothetical protein	4335.53	14175.7	9137.1	6140.28	2530.78	10743.8	17607.5	9265.52	9008.69
tca_01726	tca_01726	hypothetical protein	4327.38	1266.48	1450.05	2289.09	6365.67	1137.41	1395.54	1415.27	1484.84
tca_00100	tca_00100	hypothetical protein	4236.67	2464.72	2809.34	4965.84	3507.49	2678.94	2250.49	2778.79	2839.89
tca_00594	tca_00594	hypothetical protein	4134.66	1699.89	1908.3	3657.19	4612.13	1475.86	1923.92	1959.6	1857
tca_00329	tca_00329	hypothetical protein	4121.42	5963.02	5749.81	1842.43	6400.41	5583.29	6342.76	5860.03	5639.59
tca_00087	glpF	Glycerol uptake facilitator protein	4023.12	840.01	879.454	2762.49	5283.76	595.765	1084.25	942.439	816.469
tca_00106	nudI	Nucleoside triphosphatase NudI	3967.24	2330.02	9327.47	3890.4	4044.08	1669.84	2990.19	9494.91	9160.04
tca_01191	tca_01191	hypothetical protein	3745.04	1068.81	1612.63	3883.2	3606.88	469.468	1668.16	1549.84	1675.42
tca_00665	tca_00665	hypothetical protein	3683.17	6692.87	5730.42	3133.27	4233.07	6010	7375.73	5727.35	5733.49
tca_01698	mer	5,10-methylenetetrahydromethanopterin reductase	3665.48	4092.72	1127.7	2136.28	5194.69	2918.46	5266.97	1052.7	1202.7
tca_01796	pyrE_3	Orotate phosphoribosyltransferase	3532.18	2781.31	1974.21	2421.25	4643.11	3843.66	1718.96	1903.28	2045.14
tca_00127	mobA	Molybdenum cofactor guanylyltransferase	3482.47	211.999	408.236	3137.94	3826.99	198.678	225.321	413.848	402.624
tca_01413	mtd	F420-dependent methylenetetrahydromethanopterin dehydrogenase	3476.21	3864.51	3488.82	4265.71	2686.71	4218.38	3510.64	3427.4	3550.23
tca_01321	tca_01321	hypothetical protein	3464.97	2690.57	1816.71	5189.53	1740.42	2949.19	2431.95	1663.19	1970.23
tca_00827	glmS_2	Glutamine--fructose-6-phosphate aminotransferase [isomerizing]	3280.84	129778	41809.7	3311.9	3249.78	242920	16636.1	38152	45467.4
tca_01661	cooF_2	Iron-sulfur protein	3256.43	2092.06	2440.47	3782.34	2730.53	2157.07	2027.05	2457.18	2423.77
tca_00779	tca_00779	hypothetical protein	3248.57	346.417	223.114	4501.34	1995.81	174.836	517.998	243.765	202.462
tca_00672	tca_00672	hypothetical protein	3087.22	3448.39	1333.27	1945.96	4228.48	4706.55	2190.23	1274.19	1392.35
tca_01241	purE_1	N5-carboxyaminoimidazole ribonucleotide mutase	3058.82	763.787	2090.22	4149.48	1968.15	332.189	1195.39	2113.92	2066.53
tca_01148	tca_01148	hypothetical protein	2923.59	2387.93	6367.07	3927.99	1919.19	1850.62	2925.24	6528.74	6205.4
tca_01821	cysP	Sulfate permease CysP	2919.78	157.525	231.215	3862.78	1976.78	96.0885	218.962	247.59	214.84
tca_01387	tca_01387	hypothetical protein	2916.07	556.851	197.257	4635.19	1196.95	249.304	864.397	179.365	215.149
tca_01815	hdrB	H(2):CoB-CoM heterodisulfide,ferredoxin reductase subunit B	2894.34	816.165	460.406	3588.44	2200.24	283.7	1348.63	479.592	441.221
tca_00252	fdtC	dTDP-3-amino-3,6-dideoxy-alpha-D-galactopyranose 3-N-acetyltransferase	2858.67	1871.03	3218.73	1339.03	4378.3	2052.68	1689.37	3141.55	3295.9
tca_01290	mutT2	Putative 8-oxo-dGTP diphosphatase 2	2817.29	1639.38	1832.27	2667.85	2966.73	1479.21	1799.55	1917.53	1747.02
tca_01669	tca_01669	hypothetical protein	2801.64	1656.77	1441.06	1806.56	3796.71	1996.14	1317.39	1455.75	1426.37
tca_01810	tca_01810	hypothetical protein	2793.31	3348.08	3681.43	983.884	4602.74	4145.49	2550.67	3543.81	3819.05
tca_00915	tca_00915	hypothetical protein	2788.21	172.605	417.331	2730.38	2846.05	51.2216	293.989	438.769	395.894
tca_01834	tca_01834	hypothetical protein	2648.67	13601.4	25677.4	1318.45	3978.89	10451.4	16751.4	25877.4	25477.3
tca_00423	ppsA_1	Phosphoenolpyruvate synthase	2647.57	1027.59	1626.18	1420.36	3874.78	1076.89	978.294	1660.14	1592.22
tca_01254	frhA	Coenzyme F420-reducing hydrogenase subunit alpha	2552.85	2326.37	502.567	614.863	4490.83	710.542	3942.19	517.04	488.094
tca_01089	mvhB	Polyferredoxin protein MvhB	2529.97	1450.91	906.44	2431.2	2628.74	848.429	2053.38	938.529	874.351
tca_01790	tca_01790	hypothetical protein	2499.4	4126.75	3272.24	2773.71	2225.08	4295.03	3958.47	3217.1	3327.37
tca_01408	tca_01408	hypothetical protein	2489.54	800.85	522.831	3811.21	1167.88	461.559	1140.14	523.601	522.061
tca_01149	tca_01149	hypothetical protein	2447.25	3656.59	11957.5	504.312	4390.19	2483.47	4829.71	11973.7	11941.4
tca_01332	cpcE_1	Phycocyanobilin lyase subunit alpha	2428.03	1096.25	1062.96	2645.7	2210.37	823.748	1368.75	1070.6	1055.32
tca_01331	tca_01331	hypothetical protein	2407.37	620.68	1021.63	2796.27	2018.48	521.193	720.168	1095.35	947.906
tca_01548	tca_01548	hypothetical protein	2349.31	280.8	467.285	2476.53	2222.09	312.208	249.393	504.19	430.38
tca_00845	tca_00845	hypothetical protein	2342.86	1666.13	1149.95	1761.09	2924.62	2636.42	695.837	1132.6	1167.3
tca_01079	pdtaS_13	putative sensor histidine kinase pdtaS	2339.15	965.96	1341.51	2059.52	2618.77	1190.88	741.043	1422.39	1260.63
tca_01755	tca_01755	hypothetical protein	2328.79	481.734	673.507	2583.24	2074.34	503.374	460.094	650.348	696.666
tca_00042	tca_00042	hypothetical protein	2313.84	106.182	781.738	2588.8	2038.89	48.5657	163.799	808.165	755.311
tca_01303	tca_01303	hypothetical protein	2301	695.123	1020.16	2861.77	1740.22	589.726	800.52	1047.96	992.367
tca_00953	tca_00953	hypothetical protein	2208.88	605.414	916.246	2793.39	1624.37	532.156	678.673	950.079	882.413
tca_01360	tca_01360	hypothetical protein	2195.61	248.591	329.41	3263.19	1128.03	308.535	188.647	319.535	339.284
tca_00250	tca_00250	hypothetical protein	2176.16	1106.93	1901.74	1180.3	3172.01	480.49	1733.37	2050.34	1753.14
tca_01256	tca_01256	hypothetical protein	2169.3	1750.63	1864.55	1654.91	2683.69	1169.25	2332.01	1934.88	1794.22
tca_00763	kynB_1	Kynurenine formamidase	2154.78	918.856	1074.95	2624.88	1684.68	753.36	1084.35	1028.48	1121.41
tca_00480	tca_00480	hypothetical protein	2147.74	2366.63	2466.77	1829.15	2466.32	1047.44	3685.82	2615.27	2318.27
tca_00798	moaA_2	Cyclic pyranopterin monophosphate synthase	2136.99	994.537	7623.41	3417.31	856.664	441.279	1547.79	7771.39	7475.42
tca_00935	tca_00935	hypothetical protein	2126.66	968.803	649.925	4244.79	8.51827	861.205	1076.4	629.328	670.522
tca_01347	bsdC	Phenolic acid decarboxylase subunit C	2119.26	1153.01	1834.19	1635.44	2603.08	1152.86	1153.16	1874.68	1793.7
tca_01727	fom3_2	2-hydroxyethylphosphonate methyltransferase	2105.92	1389.35	1249.84	1298.85	2912.99	1039.33	1739.38	1266.88	1232.81
tca_00846	tca_00846	hypothetical protein	2090.04	423.069	381.876	2035.15	2144.92	413.814	432.325	385.893	377.858
tca_01647	tca_01647	hypothetical protein	2049.17	307.969	364.855	2373.66	1724.68	222.398	393.54	353.376	376.335
tca_01728	albA	Antilisterial bacteriocin subtilosin biosynthesis protein AlbA	2030.19	614.041	1223.76	1885.69	2174.7	560.041	668.041	1222.13	1225.38
tca_01816	tca_01816	hypothetical protein	1994.7	85.3868	129.533	3178.86	810.534	32.7409	138.033	108.621	150.445
tca_00294	tca_00294	hypothetical protein	1954.34	129.736	327.968	1945.2	1963.48	141.913	117.559	318.855	337.081
tca_01838	tca_01838	hypothetical protein	1938.26	204.494	496.574	1222.31	2654.21	148.166	260.821	535.771	457.376
tca_00478	tca_00478	hypothetical protein	1894.68	1019.27	1447.63	2564.38	1224.98	1171.76	866.775	1436.78	1458.47
tca_00094	tca_00094	hypothetical protein	1891.03	242.291	275.686	1232.76	2549.31	281.373	203.209	258.184	293.187
tca_00855	tca_00855	hypothetical protein	1878.1	343.803	490.721	1317.02	2439.18	298.731	388.875	487.946	493.496
tca_00788	tca_00788	hypothetical protein	1871.08	4430.48	5893.82	2653.12	1089.03	2100.99	6759.98	5951.16	5836.49
tca_01022	tufA	Elongation factor Tu	1869.51	1338.86	1219.98	1674.95	2064.08	932.602	1745.12	1239.82	1200.14
tca_01626	rplK	50S ribosomal protein L11	1867.82	83.5325	169.408	1205.96	2529.67	0	167.065	176.324	162.492
tca_01797	moaB	Molybdenum cofactor biosynthesis protein B	1866.76	381.975	724.289	1115.68	2617.84	349.998	413.952	716.667	731.911
tca_01293	tca_01293	hypothetical protein	1837.4	602.657	566.206	2100.8	1574.01	491.404	713.909	572.937	559.474
tca_01164	tca_01164	hypothetical protein	1835.98	2292.28	1871.62	989.541	2682.41	2398.09	2186.47	1919.36	1823.88
tca_01026	tca_01026	hypothetical protein	1815.62	3408.38	3801.12	582.327	3048.91	2785.15	4031.62	3782.82	3819.42
tca_00406	afsQ1	Transcriptional regulatory protein AfsQ1	1811.38	274.983	1016.13	1226.84	2395.91	357.238	192.729	1081.52	950.741
tca_01251	frhB	Coenzyme F420-reducing hydrogenase subunit beta	1808.73	635.267	280.26	1377.02	2240.44	594.154	676.38	231.806	328.714
tca_01611	cmk_3	Cytidylate kinase	1735.04	135.509	658.388	1313.86	2156.22	92.0192	178.999	669.523	647.254
tca_00623	tca_00623	hypothetical protein	1722.74	302.174	429.877	1929.54	1515.93	274.502	329.846	444.78	414.973
tca_01212	tca_01212	hypothetical protein	1709.4	508.931	647.186	1849.14	1569.66	631.354	386.507	664.946	629.425
tca_00057	tca_00057	hypothetical protein	1693.5	16.3454	69.9384	2122.17	1264.83	24.4458	8.2449	116.374	23.5026
tca_00989	tca_00989	hypothetical protein	1660.1	864.629	902.659	1167.22	2152.97	563.669	1165.59	928.68	876.639
tca_00598	tca_00598	hypothetical protein	1655.26	1337.45	599.54	2469.28	841.238	395.336	2279.57	573.563	625.518
tca_00402	ysdC	Putative aminopeptidase YsdC	1646.46	1262.38	1909.09	813.406	2479.51	1260.43	1264.33	1876.04	1942.14
tca_01616	tca_01616	hypothetical protein	1609.72	158.292	640.965	681.263	2538.17	132.065	184.519	590.465	691.465
tca_01125	mcrB	Methyl-coenzyme M reductase subunit beta	1604.83	1624.53	991.548	499.768	2709.9	1138.67	2110.39	1029.22	953.881
tca_00674	tca_00674	hypothetical protein	1601.5	436.528	565.695	654.666	2548.34	457	416.056	559.47	571.921
tca_01292	ppiB	Peptidyl-prolyl cis-trans isomerase B	1590.69	964.388	863.602	1797.05	1384.33	825.958	1102.82	929.34	797.863
tca_01240	ytcD	putative HTH-type transcriptional regulator YtcD	1589.04	744.051	1091.25	1260.78	1917.29	165.565	1322.54	1077.63	1104.88
tca_01111	tca_01111	hypothetical protein	1572.5	197.446	237.644	2003.24	1141.76	141.65	253.241	262.142	213.146
tca_00609	tca_00609	hypothetical protein	1560.24	117.766	164.786	2929.98	190.504	159.035	76.4961	172.9	156.671
tca_01114	mtrG	Tetrahydromethanopterin S-methyltransferase subunit G	1535.57	1866.41	915.764	828.926	2242.21	1590.94	2141.87	943.624	887.904
tca_01573	tca_01573	hypothetical protein	1515.64	95.1046	84.1842	1718.92	1312.36	71.8225	118.387	92.934	75.4343
tca_01285	tca_01285	hypothetical protein	1504.44	1649.48	3031.91	227.354	2781.53	1492.8	1806.17	3021.19	3042.63
tca_00388	tca_00388	hypothetical protein	1489.94	3777.04	2143.13	1656.52	1323.36	3561.48	3992.59	2242.06	2044.2
tca_01837	tca_01837	hypothetical protein	1489.71	261.058	2127.19	1394.44	1584.99	294.579	227.537	2148.29	2106.09
tca_00511	tca_00511	hypothetical protein	1478.74	1256.82	403.741	2157.33	800.137	1456.97	1056.67	390.727	416.756
tca_01115	mtrF	Tetrahydromethanopterin S-methyltransferase subunit F	1475.58	1592.27	596.713	964.77	1986.4	1203.58	1980.95	656.051	537.375
tca_01524	hrp1_3	Hypoxic response protein 1	1469.62	367.779	586.511	880.544	2058.69	225.483	510.075	599.182	573.84
tca_00811	hldE	Bifunctional protein HldE	1466.48	1426.69	2642.84	2335.76	597.191	392.998	2460.38	2686.37	2599.32
tca_00253	lppC	Putative lipoprotein LppC	1465.42	1979.91	1730.96	729.925	2200.91	2046.47	1913.35	1786.87	1675.05
tca_01390	tca_01390	hypothetical protein	1436.6	224.02	610.911	897.378	1975.83	128.556	319.484	519.019	702.802
tca_00638	tca_00638	hypothetical protein	1431.24	211.56	567.104	1014.39	1848.1	174.836	248.284	551.54	582.668
tca_01811	tca_01811	hypothetical protein	1431.12	883.725	806.041	1933.2	929.044	1081.69	685.76	797.47	814.612
tca_01414	yafJ_1	Putative glutamine amidotransferase YafJ	1415.65	1614.82	1064.19	984.221	1847.07	1844.71	1384.92	1046.92	1081.47
tca_01175	tca_01175	hypothetical protein	1414.57	1380.65	1793.71	1008.62	1820.52	1138.26	1623.05	1746.36	1841.07
tca_00731	nth_2	Endonuclease III	1409.71	530.043	460.802	1428.88	1390.53	610.75	449.336	444.072	477.531
tca_00010	tca_00010	hypothetical protein	1396.99	1251.91	828.543	1685.98	1108	371.385	2132.43	881.58	775.506
tca_01348	pflA_3	Pyruvate formate-lyase 1-activating enzyme	1391.77	768.913	1104.3	1278.95	1504.6	701.193	836.633	1072.37	1136.23
tca_00102	tca_00102	hypothetical protein	1373.31	253.77	393.809	1677.13	1069.48	288.006	219.534	413.956	373.663
tca_01779	rbsK	Ribokinase	1370.32	746.115	902.794	1117.77	1622.87	714.894	777.336	920.122	885.466
tca_01844	pglB_3	Undecaprenyl-diphosphooligosaccharide--protein glycotransferase	1369.78	493.709	593.359	1269.8	1469.76	374.143	613.274	566.379	620.339
tca_00086	tca_00086	hypothetical protein	1362.37	428.743	582.678	792.49	1932.26	364.242	493.243	644.486	520.87
tca_01508	fwdB	Tungsten formylmethanofuran dehydrogenase subunit B	1350.94	373.86	298.007	1524.58	1177.3	286.01	461.71	308.67	287.345
tca_00738	tca_00738	hypothetical protein	1349.85	345.23	662.857	539.333	2160.37	222.593	467.868	736.343	589.371
tca_01466	tca_01466	hypothetical protein	1349.7	347.198	393.011	1935.15	764.248	389.655	304.742	413.956	372.066
tca_00403	tca_00403	hypothetical protein	1347.06	145.594	186.568	1313.86	1380.26	153.365	137.822	232.193	140.943
tca_00390	tca_00390	hypothetical protein	1346.13	2272.69	834.752	1473.54	1218.73	2139.92	2405.46	792.421	877.083
tca_01423	trpB_1	Tryptophan synthase beta chain	1338.49	1166.49	1335.47	1201.45	1475.54	917.424	1415.55	1347.4	1323.54
tca_00128	tca_00128	hypothetical protein	1332.34	97.0502	203.323	1223.7	1440.98	85.7041	108.396	227.917	178.73
tca_00654	tca_00654	hypothetical protein	1325.02	531.174	468.892	1639.01	1011.02	430.468	631.879	474.297	463.486
tca_00076	tca_00076	Protease 1	1322.8	595.029	204.493	1386.86	1258.74	431.34	758.719	205.211	203.776
tca_01192	tca_01192	hypothetical protein	1308.37	277.643	653.698	1308.13	1308.61	222.681	332.604	671.424	635.972
tca_01151	hdaH	Histone deacetylase-like amidohydrolase	1306.72	1283.53	941.236	1453.69	1159.74	750.427	1816.64	980.318	902.154
tca_00500	tca_00500	hypothetical protein	1303.65	1733.88	1774.13	1426.48	1180.82	1415.34	2052.41	1832.62	1715.63
tca_00988	tca_00988	hypothetical protein	1281.63	1162.2	1984.15	0	2563.26	553.398	1771	1906.59	2061.71
tca_01375	tca_01375	Non-canonical purine NTP pyrophosphatase	1281.01	149.584	158.171	2036.02	526.003	85.2482	213.92	167.325	149.017
tca_00291	tca_00291	hypothetical protein	1280.73	2815.62	2775.71	777.677	1783.78	2627.99	3003.24	2655.96	2895.46
tca_00041	tca_00041	hypothetical protein	1270.66	729.014	1020.83	1188.73	1352.58	234.156	1223.87	1063.18	978.471
tca_01250	map	Methionine aminopeptidase	1260.47	782.497	542.825	653.737	1867.2	613.203	951.792	556.447	529.203
tca_00181	tca_00181	hypothetical protein	1257.07	258.143	839.469	837.348	1676.78	164.94	351.346	870.51	808.428
tca_00683	trxB	Thioredoxin reductase	1243.97	605.999	1041.46	1446.36	1041.59	637.124	574.875	1040.72	1042.21
tca_00770	tca_00770	hypothetical protein	1231	608.022	559.152	1937.2	524.81	427.84	788.204	591.875	526.429
tca_00222	ydiB	Quinate/shikimate dehydrogenase	1228.09	586.627	613.01	1686.58	769.599	597.731	575.522	628.411	597.608
tca_00061	tca_00061	transmembrane protein	1222.95	741.683	849.417	1894.24	551.662	324.265	1159.1	827.128	871.705
tca_01302	cbiL	Cobalt-precorrin-2 C(20)-methyltransferase	1211.49	502.435	520.51	1214.24	1208.74	447.096	557.774	551.231	489.788
tca_00600	tca_00600	hypothetical protein	1205.38	212.662	539.113	1466.11	944.659	135.29	290.035	529.399	548.826
tca_00481	tca_00481	hypothetical protein	1203.39	470.206	555.578	1102.37	1304.41	401.601	538.812	584.287	526.869
tca_00812	tca_00812	hypothetical protein	1196.73	2192.53	3638.11	1562.66	830.81	353.982	4031.07	3661.17	3615.05
tca_01634	tca_01634	hypothetical protein	1196.59	858.018	2185.18	581.159	1812.03	513.408	1202.63	2287.85	2082.5
tca_00105	tca_00105	hypothetical protein	1188.3	391.309	905.827	813.623	1562.98	320.533	462.085	965.706	845.948
tca_01765	nadA	Quinolinate synthase A	1184.36	145.484	358.017	1618.76	749.955	148.085	142.882	378.34	337.695
tca_00180	tca_00180	hypothetical protein	1180.6	743.453	769.963	71.4261	2289.77	459.602	1027.3	769.88	770.045
tca_01738	trmO	tRNA (adenine(37)-N6)-methyltransferase	1167.08	608.191	1294.03	763.776	1570.39	675.696	540.686	1413.29	1174.76
tca_00698	ftsH_1	ATP-dependent zinc metalloprotease FtsH	1164.49	4672.07	5050.64	1349.74	979.24	3286.16	6057.97	4988.03	5113.26
tca_00219	tca_00219	hypothetical protein	1156.12	672.721	682.107	971.439	1340.81	798.984	546.459	681.682	682.532
tca_01402	hcp	Hydroxylamine reductase	1152.15	1625.3	1673.96	169.129	2135.17	1553.21	1697.39	1735.97	1611.94
tca_01242	hypF	Carbamoyltransferase HypF	1151.57	1093.09	740.017	992.164	1310.99	1481.7	704.479	745.61	734.424
tca_01335	hdrA	H(2):CoB-CoM heterodisulfide,ferredoxin reductase subunit A	1135.76	563.126	730.086	1285.99	985.516	270.422	855.829	784.45	675.722
tca_01636	tca_01636	hypothetical protein	1127.56	714.386	462.416	1280.18	974.936	616.41	812.362	507.562	417.269
tca_00144	sodA	Superoxide dismutase [Mn]	1126.14	1585.72	1393.74	847.144	1405.14	1198.59	1972.85	1345.51	1441.96
tca_01715	tca_01715	hypothetical protein	1118.87	1608.85	862.303	1386.86	850.887	1226.64	1991.07	864.28	860.327
tca_01530	tca_01530	hypothetical protein	1118.3	730.901	591.296	1487.35	749.255	849.899	611.903	548.191	634.401
tca_00632	tca_00632	hypothetical protein	1116.55	198.047	447.213	1331.38	901.719	152.982	243.112	468.02	426.407
tca_00851	tca_00851	hypothetical protein	1110.78	288.388	894.462	178.949	2042.6	281.994	294.782	927.295	861.63
tca_00553	tca_00553	hypothetical protein	1107.29	854.231	1244	950.494	1264.09	959.966	748.495	1313.64	1174.36
tca_01756	tca_01756	hypothetical protein	1103.28	121.085	179.287	1004.28	1202.29	81.6406	160.529	150.803	207.77
tca_01725	tca_01725	hypothetical protein	1094.87	268.898	395.263	984.221	1205.52	250.662	287.134	398.473	392.053
tca_01099	hmd	5,10-methenyltetrahydromethanopterin hydrogenase	1092.3	1279.82	735.752	369.829	1814.76	346.294	2213.34	701.863	769.641
tca_01253	frhD	Coenzyme F420-reducing hydrogenase subunit delta	1087.18	524.743	241.005	628.011	1546.34	219.92	829.566	276.015	205.994
tca_01168	tca_01168	hypothetical protein	1082.11	193.742	184.635	1092.93	1071.3	208.76	178.725	200.171	169.099
tca_01116	mtrA	Tetrahydromethanopterin S-methyltransferase subunit A	1069.65	1003.76	443.239	765.963	1373.33	737.629	1269.88	471.904	414.573
tca_01764	tca_01764	Ferredoxin	1068.15	250.497	455.139	678.354	1457.94	314.753	186.241	457.428	452.85
tca_00146	tca_00146	hypothetical protein	1065.13	467.947	559.535	809	1321.27	480.598	455.296	516.825	602.246
tca_01549	tca_01549	hypothetical protein	1063.25	434.842	366.165	686.129	1440.38	483.101	386.583	402.198	330.132
tca_01436	tca_01436	hypothetical protein	1059.39	272.756	356.635	924.572	1194.21	238.912	306.601	358.873	354.398
tca_00897	tca_00897	hypothetical protein	1056.46	191.323	298.841	524.757	1588.16	108.288	274.357	323.487	274.194
tca_00255	cyoE	Protoheme IX farnesyltransferase	1047.47	756.348	2609.96	1164.54	930.4	600.583	912.113	2580.52	2639.39
tca_01465	tca_01465	hypothetical protein	1044.72	304.17	450.341	494.325	1595.12	331.785	276.554	490.733	409.948
tca_01055	tca_01055	Homogentisate phytyltransferase	1040.28	690.729	1969.05	1121.29	959.276	1327.81	53.6519	1938.79	1999.31
tca_00405	tca_00405	hypothetical protein	1035.47	147.577	360.769	702.928	1368.02	214.554	80.6003	383.623	337.914
tca_00725	gloA	Lactoylglutathione lyase	1033.01	467.048	886.223	853.451	1212.57	473.204	460.891	978.402	794.044
tca_01594	murG_2	UDP-N-acetylglucosamine--N-acetylmuramyl-(pentapeptide) pyrophosphoryl-undecaprenol N-acetylglucosamine transferase	1032.54	417.139	515.887	885.06	1180.03	427.544	406.734	488.327	543.448
tca_01090	mvhA	Methyl viologen-reducing hydrogenase subunit alpha	1025.41	795.167	606.226	856.157	1194.67	554.449	1035.89	653.7	558.753
tca_00539	tca_00539	hypothetical protein	1024.31	2423.03	1850.11	535.122	1513.5	1407.78	3438.28	1900.6	1799.63
tca_01286	tca_01286	hypothetical protein	1015.86	402.976	1088.69	467.152	1564.56	249.219	556.734	1062.84	1114.53
tca_01717	tca_01717	hypothetical protein	1015.39	864.082	740.786	726.905	1303.87	839.014	889.151	805.343	676.228
tca_00840	iolX	scyllo-inositol 2-dehydrogenase (NAD(+))	1012.63	163.603	179.883	1617.28	407.988	11.4183	315.787	177.02	182.747
tca_01640	aspC_1	Aspartate aminotransferase	1002.09	136.941	432.139	1162.92	841.264	63.9746	209.908	465.129	399.149
tca_01163	tca_01163	hypothetical protein	1000.26	494.5	1070.25	501.274	1499.24	100.935	888.065	1105.57	1034.93
tca_01703	otsA	Trehalose-phosphate synthase	995.976	213.74	555.41	423.298	1568.65	282.325	145.155	563.571	547.249
tca_01322	tca_01322	hypothetical protein	989.753	499.149	1165.55	948.524	1030.98	366.13	632.168	1184.26	1146.84
tca_00761	groL_2	60 kDa chaperonin	988.571	1236.11	1572.26	236.718	1740.42	1023.12	1449.09	1616.2	1528.33
tca_01748	tca_01748	hypothetical protein	987.399	319.04	263.529	902.021	1072.78	251.712	386.367	255.749	271.309
tca_01550	tca_01550	hypothetical protein	983.218	1993.92	1484.39	1166.63	799.808	1506.99	2480.85	1556.88	1411.9
tca_00831	adeC	Adenine deaminase	981.367	1289.78	2273.46	1255.63	707.1	1356.96	1222.61	2304.3	2242.62
tca_00619	tca_00619	hypothetical protein	972.308	447.12	485.351	631.986	1312.63	193.648	700.591	470.059	500.643
tca_01612	tca_01612	hypothetical protein	966.748	173.498	557.847	1415.16	518.335	81.7687	265.227	529.243	586.452
tca_00809	tca_00809	hypothetical protein	965.284	183.153	4512.22	943.635	986.934	127.673	238.632	4673.08	4351.35
tca_00283	tca_00283	hypothetical protein	963.014	401.958	571.798	883.931	1042.1	508.338	295.577	557.307	586.29
tca_01353	tca_01353	hypothetical protein	948.556	314.62	354.225	1376.27	520.841	372.584	256.655	367.224	341.226
tca_00531	tca_00531	hypothetical protein	941.279	537.66	316.043	1057.6	824.954	495.265	580.056	322.354	309.732
tca_00192	tca_00192	hypothetical protein	926.456	494.932	568.52	974.548	878.364	558.669	431.195	601.873	535.166
tca_01184	queE	7-carboxy-7-deazaguanine synthase	924.513	533.781	430.153	950.988	898.039	214.085	853.478	436.547	423.759
tca_00065	tca_00065	hypothetical protein	920.236	122.017	252.587	945.585	894.888	66.2259	177.808	237.149	268.026
tca_00063	tca_00063	hypothetical protein	915.673	940.525	621.783	353.695	1477.65	701.595	1179.45	633.879	609.686
tca_00952	tilS	tRNA(Ile)-lysidine synthase	915.211	992.473	727.963	537.358	1293.06	1201.69	783.257	727.025	728.901
tca_00091	tca_00091	hypothetical protein	913.225	2362.44	987.264	800.966	1025.48	2236.1	2488.79	934.645	1039.88
tca_01754	nucS	Endonuclease NucS	907.907	307.027	415.935	839.85	975.965	388.912	225.142	437.116	394.753
tca_00017	tca_00017	hypothetical protein	904.85	330.472	279.589	0	1809.7	151.768	509.177	284.52	274.658
tca_00898	tca_00898	hypothetical protein	902.726	508.552	476.267	457.52	1347.93	390.528	626.577	455.602	496.933
tca_01238	wecD	dTDP-fucosamine acetyltransferase	886.093	258.474	253.834	635.643	1136.54	242.828	274.12	246.957	260.711
tca_00282	tca_00282	hypothetical protein	882.959	298.958	346.352	801.652	964.267	265.286	332.63	348.587	344.117
tca_01215	ftr	Formylmethanofuran--tetrahydromethanopterin formyltransferase	873.381	247.392	369.499	930.777	815.986	205.345	289.439	373.324	365.674
tca_00826	hspA	HSP20 family protein	870.909	31359.3	5819.32	391.165	1350.65	56775.1	5943.51	5036.28	6602.37
tca_00612	tca_00612	hypothetical protein	867.487	47.2038	244.04	818.473	916.502	47.7695	46.6381	231.431	256.648
tca_00422	pdtaS_6	putative sensor histidine kinase pdtaS	867.105	555.609	528.125	596.846	1137.36	551.68	559.537	548.91	507.339
tca_00641	tca_00641	hypothetical protein	864.302	144.184	549.683	1246.16	482.442	147.809	140.56	549.303	550.063
tca_01284	lagD_1	Lactococcin-G-processing and transport ATP-binding protein LagD	864.041	1702.03	2691.73	186.611	1541.47	924.53	2479.52	2717.5	2665.95
tca_00978	tca_00978	hypothetical protein	860.79	225.052	207.914	1309.19	412.386	189.406	260.699	222.194	193.634
tca_00350	tca_00350	hypothetical protein	860.136	78.3958	206.052	973.233	747.039	42.6015	114.19	203.701	208.403
tca_01445	kaiC_6	Circadian clock protein kinase KaiC	859.534	235.757	273.404	890.328	828.741	236.833	234.682	274.693	272.115
tca_01761	tca_01761	hypothetical protein	857.22	398.784	630.509	452.851	1261.59	599.637	197.931	589.787	671.231
tca_00692	tca_00692	hypothetical protein	851.858	223.445	1048.45	426.725	1276.99	81.9007	364.989	1059.62	1037.28
tca_01541	tca_01541	hypothetical protein	849.474	30.06	30.5022	1532.84	166.106	0	60.12	30.286	30.7184
tca_01517	nasC	Assimilatory nitrate reductase catalytic subunit	842.94	97.381	230.061	1114.48	571.404	90.6511	104.111	232.819	227.303
tca_00727	apnhaP	Na(+)/H(+) antiporter ApNhaP	840.808	1115.46	1307.97	513.137	1168.48	1436.94	793.993	1310.46	1305.49
tca_00260	asrC	Anaerobic sulfite reductase subunit C	839.034	720.037	941.701	972.81	705.258	826.672	613.402	999.421	883.982
tca_01023	rpsJ	30S ribosomal protein S10	838.467	367	588.145	430.868	1246.07	219.253	514.748	612.307	563.983
tca_01653	tca_01653	hypothetical protein	828.516	2379.44	1920.8	157.003	1500.03	1539.44	3219.45	1907.98	1933.62
tca_01617	fbiB_2	Coenzyme F420:L-glutamate ligase	826.615	1115	646.304	871.739	781.49	897.598	1332.4	620.921	671.687
tca_00433	tca_00433	hypothetical protein	825.786	176.445	186.048	1267.98	383.589	235.89	116.999	168.063	204.032
tca_00790	pdtaS_9	putative sensor histidine kinase pdtaS	825.11	1836.45	2279.36	789.141	861.079	1326.66	2346.24	2285.53	2273.19
tca_00093	tca_00093	hypothetical protein	817.868	7549.26	2250.08	1354.1	281.639	4847.01	10251.5	2153.12	2347.03
tca_00640	tca_00640	hypothetical protein	816.821	69.8965	190.652	426.725	1206.92	22.4149	117.378	200.664	180.641
tca_01422	tca_01422	hypothetical protein	814.601	334.903	604.095	759.122	870.08	61.3461	608.46	575.03	633.16
tca_01488	nrdD	Anaerobic ribonucleoside-triphosphate reductase	809.582	1076.03	1038.79	294.617	1324.55	1118.21	1033.85	1062.02	1015.56
tca_00559	tca_00559	hypothetical protein	804.452	152.169	335.438	827.413	781.49	153.105	151.233	332.907	337.969
tca_01107	sufB	FeS cluster assembly protein SufB	802.825	169.73	546.776	755.854	849.796	58.4915	280.969	579.821	513.731
tca_00031	tca_00031	hypothetical protein	802.535	333.81	237.984	1094.89	510.183	277.975	389.646	256.422	219.546
tca_01833	tca_01833	hypothetical protein	800.93	1686.57	3724.16	504.312	1097.55	2571.77	801.36	3696.73	3751.58
tca_00963	cbiJ	Cobalt-precorrin-6A reductase	799.57	588.531	530.524	683.662	915.478	587.405	589.657	521.403	539.646
tca_01437	tca_01437	hypothetical protein	797.967	203.351	240.597	778.587	817.348	217.267	189.435	251.71	229.484
tca_00650	tca_00650	hypothetical protein	791.24	62.5964	291.574	180.894	1401.59	63.3465	61.8462	265.2	317.947
tca_01705	hddC_2	D-glycero-alpha-D-manno-heptose 1-phosphate guanylyltransferase	790.573	325.445	391.184	646.721	934.424	366.13	284.761	408.27	374.098
tca_00232	tca_00232	hypothetical protein	790.275	458.639	397.371	655.605	924.946	311.262	606.016	408.035	386.707
tca_01220	rlmCD	23S rRNA (uracil-C(5))-methyltransferase RlmCD	789.664	172.887	582.852	299.861	1279.47	137.821	207.952	505.967	659.737
tca_01428	anfK	Nitrogenase iron-iron protein beta chain	786.021	516.548	238.427	1240.51	331.537	461.252	571.844	221.692	255.163
tca_00249	argH	Argininosuccinate lyase	783.427	319.631	355.215	851.631	715.223	273.376	365.886	371.353	339.077
tca_01762	coq7	2-nonaprenyl-3-methyl-6-methoxy-1,4-benzoquinol hydroxylase	783.034	380.482	320.427	442.186	1123.88	358.964	402	312.458	328.396
tca_00710	tca_00710	hypothetical protein	774.966	665.369	290.556	1144.16	405.774	478.068	852.669	261.823	319.29
tca_00567	tca_00567	hypothetical protein	773.755	549.945	439.709	1139.88	407.627	329.315	770.574	456.143	423.275
tca_00724	dfx	Desulfoferrodoxin	772.779	770.704	1470	754.45	791.109	588.616	952.791	1501.35	1438.66
tca_00578	tca_00578	hypothetical protein	769.699	114.135	206.53	1125.57	413.833	63.3465	164.923	171.24	241.819
tca_01827	tca_01827	hypothetical protein	765.87	213.555	413.366	575.038	956.702	222.099	205.011	424.792	401.939
tca_00684	tca_00684	transmembrane protein	765.693	396.612	860.43	905.703	625.683	341.942	451.282	867.457	853.403
tca_00799	tca_00799	hypothetical protein	755.695	53.6434	500.694	1193.34	318.048	38.1184	69.1684	503.17	498.218
tca_00834	efp	Elongation factor P	755.217	275.461	585.819	677.549	832.886	150.146	400.777	555.228	616.409
tca_00972	ftsH3	ATP-dependent zinc metalloprotease FtsH 3	752.298	213.944	135.805	462.286	1042.31	123.372	304.515	122.099	149.512
tca_00691	tca_00691	hypothetical protein	751.22	281.481	380.277	967.776	534.664	356.3	206.662	383.862	376.693
tca_00479	tca_00479	hypothetical protein	748.682	658.23	522.121	482.385	1014.98	707.369	609.091	533.736	510.506
tca_00243	ppa	Inorganic pyrophosphatase	747.159	637.799	377.311	1096.95	397.368	539.161	736.437	399.661	354.961
tca_00593	rhdA	Putative thiosulfate sulfurtransferase	742.743	726.788	613.839	483.226	1002.26	581.265	872.312	636.252	591.425
tca_00530	tca_00530	hypothetical protein	741.286	576.882	441.305	600.371	882.202	473.042	680.722	490.24	392.369
tca_01711	tmk_2	Thymidylate kinase	740.617	96.9535	183.883	995.692	485.541	67.2448	126.662	172.335	195.43
tca_00735	tca_00735	hypothetical protein	737.657	59.6469	200.015	0	1475.31	54.6364	64.6574	180.303	219.727
tca_00085	tca_00085	hypothetical protein	735.635	408.254	571.547	521.458	949.811	377.355	439.153	584.027	559.067
tca_00939	pflA_1	Pyruvate formate-lyase 1-activating enzyme	734.611	469.38	502.24	472.896	996.326	396.487	542.274	543.864	460.616
tca_00604	gtaB	UTP--glucose-1-phosphate uridylyltransferase	731.474	359.952	291.309	213.363	1249.59	394.808	325.096	300.996	281.621
tca_01629	tca_01629	hypothetical protein	729.445	579.451	474.862	700.161	758.728	480.942	677.961	549.735	399.988
tca_01252	frhG	Coenzyme F420-reducing hydrogenase subunit gamma	729.213	419.198	266.24	140.696	1317.73	364.242	474.154	280.211	252.268
tca_01406	tca_01406	hypothetical protein	726.924	136.661	210.501	622.671	831.177	118.936	154.386	219.213	201.79
tca_00789	ngr	Nigerythrin	722.864	1427.45	1117.41	135.303	1310.43	537.48	2317.42	1154.61	1080.21
tca_01344	tca_01344	hypothetical protein	722.295	606.932	417.232	731.333	713.257	611.365	602.499	404.593	429.871
tca_00611	tca_00611	hypothetical protein	719.851	105.238	108.554	832.114	607.587	72.8485	137.628	96.4537	120.654
tca_00165	tca_00165	hypothetical protein	719.163	327.419	333.333	809	629.325	121.414	533.423	334.072	332.594
tca_01568	tca_01568	hypothetical protein	716.775	238.418	151.357	1225.59	207.955	55.0599	421.777	130.253	172.46
tca_00902	tca_00902	hypothetical protein	716.501	1102.41	821.528	0	1433	1114.39	1090.44	840.238	802.819
tca_01795	tca_01795	hypothetical protein	714.318	494.219	205.269	426.725	1001.91	504.336	484.101	212.468	198.071
tca_00850	tca_00850	hypothetical protein	713.096	113.619	137.905	338.91	1087.28	105.408	121.83	130.752	145.057
tca_01789	tca_01789	hypothetical protein	712.982	28.5437	518.018	901.105	524.859	40.6768	16.4105	528.893	507.142
tca_00596	tca_00596	hypothetical protein	708.905	1244.83	1927.47	239.889	1177.92	2043.7	445.961	2032.16	1822.77
tca_01146	trm1_1	tRNA (guanine(26)-N(2)/guanine(27)-N(2))-dimethyltransferase	703.552	183.056	212.452	626.088	781.017	152.963	213.149	207.015	217.888
tca_01654	nikMN	Fused nickel transport protein NikMN	701.555	2324.76	1908.69	203.575	1199.54	1319.96	3329.56	1923.75	1893.63
tca_00526	tca_00526	hypothetical protein	700.222	146.443	301.133	939.247	461.197	30.8353	262.051	306.898	295.367
tca_00873	tca_00873	hypothetical protein	697.279	17.4357	55.609	810.299	584.26	0	34.8714	67.2417	43.9762
tca_00256	tca_00256	hypothetical protein	696.654	247.246	695.012	717.903	675.406	162.838	331.654	774.467	615.558
tca_00477	kcsA_1	pH-gated potassium channel KcsA	696.254	316.962	420.601	858.282	534.226	351.872	282.053	437.764	403.437
tca_01391	tca_01391	hypothetical protein	693.993	179.57	483.37	385.471	1002.52	136.453	222.687	488.163	478.578
tca_00392	tca_00392	hypothetical protein	691.925	476.416	375.115	569.996	813.853	438.567	514.265	377.294	372.935
tca_00930	tca_00930	hypothetical protein	688.797	528.349	500.043	622.308	755.286	385.256	671.442	509.53	490.556
tca_01583	tca_01583	hypothetical protein	685.27	343.827	232.54	708.182	662.357	365.35	322.304	225.276	239.804
tca_00772	thrB_1	Homoserine kinase	683.539	141.591	97.7146	902.177	464.9	110.911	172.271	112.034	83.3954
tca_00566	tca_00566	hypothetical protein	682.222	413.3	336.84	562.239	802.205	241.188	585.411	353.555	320.125
tca_01650	tca_01650	hypothetical protein	681.121	181.588	231.185	439.11	923.132	207.589	155.587	243.332	219.038
tca_01575	tca_01575	hypothetical protein	676.093	72.2135	110.827	892.69	459.497	41.867	102.56	134.048	87.6066
tca_01002	tca_01002	hypothetical protein	670.783	586.822	387.861	889.135	452.431	271.595	902.049	392.445	383.278
tca_00552	tca_00552	hypothetical protein	670.116	1005.57	827.479	609.608	730.624	1221.61	789.531	848.186	806.771
tca_01484	tca_01484	hypothetical protein	669.163	525.062	485.241	675.03	663.296	556.528	493.597	487.443	483.039
tca_01183	hrp1_2	Hypoxic response protein 1	666.795	841.535	778.678	590.152	743.439	402.992	1280.08	792.548	764.807
tca_01038	tca_01038	hypothetical protein	664.339	1961.98	1462.24	417.185	911.494	2413.97	1509.99	1466.6	1457.87
tca_00839	hemC	Porphobilinogen deaminase	664.262	276.245	140.037	746.034	582.49	226.082	326.408	125.934	154.14
tca_01814	hdrC	H(2):CoB-CoM heterodisulfide,ferredoxin reductase subunit C	663.31	336.565	196.932	586.747	739.872	158.772	514.358	164.761	229.102
tca_00327	tca_00327	hypothetical protein	662.503	381.049	104.583	949.493	375.514	407.441	354.657	94.5098	114.657
tca_00764	tca_00764	hypothetical protein	659.516	587.383	282.008	669.517	649.514	540.084	634.683	275.15	288.865
tca_01782	tca_01782	hypothetical protein	658.063	591.558	546.362	662.662	653.465	721.026	462.091	566.138	526.585
tca_01266	tca_01266	hypothetical protein	658.001	1190.98	880.421	679.277	636.724	787.953	1594	922.574	838.269
tca_01853	rtcA	RNA 3'-terminal phosphate cyclase	656.5	388.303	498.93	377.488	935.512	159.491	617.115	552.962	444.898
tca_01080	tca_01080	hypothetical protein	655.258	242.916	234.428	719.111	591.406	252.946	232.886	226.622	242.233
tca_01446	ribBA	Riboflavin biosynthesis protein RibBA	653.949	556.603	405.076	813.623	494.276	398.238	714.967	382.6	427.552
tca_00819	tca_00819	hypothetical protein	650.854	3918.8	9179.77	167.47	1134.24	3694.66	4142.95	9426.41	8933.13
tca_00088	bmr3	Multidrug resistance protein 3	646.628	123.295	199.872	217.073	1076.18	150.448	96.1427	203.153	196.59
tca_00901	tca_00901	hypothetical protein	638.742	777.05	667.518	544.837	732.647	780.52	773.579	575.434	759.602
tca_01444	purQ_2	Phosphoribosylformylglycinamidine synthase subunit PurQ	638.189	248.266	188.199	704.796	571.582	204.513	292.018	205.018	171.38
tca_00156	wbbL	N-acetylglucosaminyl-diphospho-decaprenol L-rhamnosyltransferase	636.951	246.84	203.983	633.04	640.862	332.522	161.158	181.558	226.408
tca_01720	tca_01720	hypothetical protein	636.709	472.403	684.393	405.909	867.508	118.453	826.353	722.334	646.452
tca_00923	tca_00923	hypothetical protein	635.905	216.485	141.98	921.753	350.058	153.248	279.722	159.297	124.664
tca_00060	tca_00060	transmembrane protein	632.975	142.357	242.595	962.309	303.64	126.37	158.345	246.615	238.574
tca_01124	mcrD	Methyl coenzyme M reductase I D protein	629.987	312.232	221.985	417.957	842.017	244.492	379.973	223.868	220.103
tca_01070	upp	Uracil phosphoribosyltransferase	629.748	191.779	364.023	924.572	334.924	360.774	22.784	366.086	361.961
tca_01213	nnr	Bifunctional NAD(P)H-hydrate repair enzyme Nnr	625.844	197.652	241.964	420.763	830.926	196.298	199.005	258.199	225.73
tca_01147	tca_01147	hypothetical protein	625.279	153.381	130.898	678.288	572.27	136.79	169.973	94.4818	167.314
tca_00095	tca_00095	hypothetical protein	624.627	295.178	194.423	523.342	725.913	476.493	113.862	211.354	177.492
tca_01490	tca_01490	hypothetical protein	623.837	340.659	462.288	620.007	627.667	471.373	209.946	484.719	439.857
tca_00311	tuaB	Teichuronic acid biosynthesis protein TuaB	614.595	86.0251	18.562	986.468	242.722	16.7643	155.286	22.4716	14.6523
tca_01071	fumB	Fumarate hydratase class I, anaerobic	612.376	418.445	211.872	835.456	389.297	355.466	481.425	186.727	237.017
tca_00001	tca_00001	hypothetical protein	611.523	279.727	360.332	609.377	613.67	209.715	349.738	360.954	359.709
tca_00284	tca_00284	hypothetical protein	609.194	261.298	267.226	721.486	496.901	256.865	265.731	266.54	267.911
tca_01264	tca_01264	hypothetical protein	606.448	407.319	1042.7	298.249	914.647	109.664	704.974	1057.64	1027.75
tca_01122	mcrG	Methyl-coenzyme M reductase subunit gamma	606.199	293.185	179.734	554.743	657.654	297.222	289.148	179.842	179.627
tca_01037	yrbG_1	Inner membrane protein YrbG	602.403	472.152	445.895	518.451	686.356	655.863	288.44	454.133	437.657
tca_00938	pheT_2	Phenylalanine--tRNA ligase beta subunit	595.775	468.354	571.629	322.257	869.293	480.619	456.089	590.238	553.021
tca_01551	tca_01551	Serine-pyruvate aminotransferase	586.871	488.34	437.643	546.12	627.622	415.199	561.481	419.004	456.282
tca_00274	tca_00274	hypothetical protein	583.905	478.784	355.24	654.472	513.338	523.854	433.713	351.726	358.753
tca_01668	tca_01668	hypothetical protein	583.121	268.884	188.327	768.951	397.292	176.712	361.057	171.681	204.974
tca_01627	rplA	50S ribosomal protein L1	582.554	97.4521	161.623	208.354	956.754	64.9822	129.922	143.363	179.882
tca_00595	tca_00595	hypothetical protein	581.255	1128.66	1346.56	0	1162.51	1606.95	650.377	1548.03	1145.08
tca_01278	tca_01278	hypothetical protein	580.539	66.7182	129.145	145.985	1015.09	6.39022	127.046	148.065	110.225
tca_00389	tca_00389	hypothetical protein	572.75	1699.07	705.23	499.269	646.232	2646.83	751.319	641.417	769.044
tca_00356	tca_00356	hypothetical protein	571.659	48.159	52.0556	828.926	314.393	50.2403	46.0777	97.0081	7.10323
tca_00112	tca_00112	hypothetical protein	567.76	364.585	304.743	633.992	501.528	445.417	283.754	296.376	313.111
tca_00762	tca_00762	hypothetical protein	567.289	186.23	250.75	247.776	886.803	159.074	213.385	253.591	247.908
tca_00957	tca_00957	Protease 1	566.283	22.5718	40.1086	0	1132.57	0	45.1437	40.7815	39.4357
tca_01646	tca_01646	hypothetical protein	565.348	142.223	138.009	616.381	514.314	89.0371	195.409	136.399	139.618
tca_00639	pdxS	Pyridoxal 5'-phosphate synthase subunit PdxS	564.97	269.342	239.833	547.195	582.744	245.306	293.377	272.972	206.694
tca_00870	bioY	Biotin transporter BioY	563.531	244.09	146.523	753.045	374.016	168.112	320.069	151.366	141.679
tca_01142	ttcA_1	tRNA 2-thiocytidine biosynthesis protein TtcA	563.459	704.709	564.943	437.432	689.487	613.598	795.819	559.897	569.99
tca_01117	mtrB	Tetrahydromethanopterin S-methyltransferase subunit B	562.198	319.106	182.917	219.7	904.695	187.531	450.681	188.393	177.44
tca_00199	tca_00199	hypothetical protein	562.171	131.939	272.066	723.578	400.764	63.3465	200.532	267.98	276.151
tca_01695	tca_01695	hypothetical protein	562.037	230.972	141.535	336.208	787.866	187.64	274.304	139.499	143.571
tca_00990	tca_00990	hypothetical protein	561.632	90.9967	118.562	198.122	925.141	61.4955	120.498	118.076	119.048
tca_00833	gbh	Guanidinobutyrase	560.477	159.932	479.566	734.503	386.451	83.7631	236.101	494.031	465.101
tca_00973	hemA	Glutamyl-tRNA reductase	560.417	232.232	228.272	455.386	665.448	242.828	221.637	229.029	227.516
tca_01737	kynB_2	Kynurenine formamidase	558.876	138.344	257.307	894.747	223.006	171.211	105.478	263.056	251.559
tca_01299	tca_01299	hypothetical protein	556.944	362.987	455.854	0	1113.89	48.9738	677.001	461.637	450.07
tca_01628	rplJ	50S ribosomal protein L10	556.653	152.608	148.941	477.375	635.931	103.76	201.455	172.573	125.308
tca_01518	tca_01518	hypothetical protein	556.181	182.237	266.532	723.578	388.785	166.285	198.189	221.834	311.23
tca_01722	tca_01722	hypothetical protein	554.881	160.642	123.525	502.138	607.624	244.922	76.3626	131.622	115.428
tca_00532	tca_00532	hypothetical protein	551.611	358.489	472.936	402.404	700.818	369.904	347.073	476.249	469.623
tca_01571	kpsF	Arabinose 5-phosphate isomerase KpsF	543.602	498.021	289.402	748.463	338.741	607.071	388.971	291.066	287.737
tca_00056	tca_00056	hypothetical protein	542.117	353.65	218.003	765.932	318.301	225.576	481.724	223.386	212.621
tca_01314	tusB	Protein TusB	536.16	563.162	487.619	821.841	250.478	539.619	586.706	544.176	431.061
tca_00428	tca_00428	hypothetical protein	530.559	120.413	830.569	746.034	315.084	170.817	70.0083	826.509	834.63
tca_01832	yjjX	Non-canonical purine NTP phosphatase	527.262	703.757	1639.05	378.234	676.29	997.528	409.987	1624.29	1653.8
tca_00359	tca_00359	hypothetical protein	525.98	32.5598	36.1847	866.786	185.175	19.513	45.6065	41.1024	31.2669
tca_00293	tca_00293	hypothetical protein	524.713	204.659	368.713	413.106	636.32	263.495	145.823	399.947	337.479
tca_00620	tca_00620	hypothetical protein	521.932	1857.22	592.807	244.226	799.638	1360.75	2353.69	638.889	546.726
tca_01670	tca_01670	hypothetical protein	520.943	872.79	385.695	178.949	862.936	932.147	813.432	321.748	449.642
tca_01609	trpD	Anthranilate phosphoribosyltransferase	519.539	373.068	537.742	424.308	614.77	344.637	401.499	535.116	540.369
tca_00496	tca_00496	hypothetical protein	516.18	299.024	138.158	447.373	584.986	93.9981	504.05	244.199	32.1173
tca_00558	mraY_1	Phospho-N-acetylmuramoyl-pentapeptide-transferase	514.179	215.592	434.821	118.39	909.967	244.309	186.876	440.698	428.944
tca_00320	tca_00320	hypothetical protein	513.376	359.152	232.293	675.829	350.923	340.206	378.098	221.995	242.592
tca_00797	thrB_2	Homoserine kinase	511.745	207.109	68.0187	748.733	274.757	96.0885	318.13	65.8984	70.139
tca_01623	ftsZ	Cell division protein FtsZ	507.865	246.619	213.062	697.059	318.67	207.866	285.373	220.131	205.994
tca_00499	tca_00499	hypothetical protein	507.012	1164.94	1112.8	242.246	771.777	868.456	1461.43	1165.95	1059.65
tca_00542	tca_00542	hypothetical protein	504.534	85.4401	377.273	0	1009.07	0	170.88	381.796	372.751
tca_01633	tca_01633	hypothetical protein	504.442	309.415	486.877	348.609	660.275	230.886	387.944	506.047	467.707
tca_01359	fucA	L-fuculose phosphate aldolase	499.031	101.959	137.526	616.381	381.68	73.2339	130.683	142.083	132.97
tca_01769	rbn_2	Ribonuclease BN	496.318	628.858	489.049	469.815	522.821	389.158	868.557	472.843	505.255
tca_01483	copA_2	Copper-exporting P-type ATPase A	495.196	206.276	241.066	343.646	646.745	207.218	205.334	244.626	237.505
tca_01763	tca_01763	hypothetical protein	493.878	353.402	215.456	404.5	583.255	304.619	402.184	214.189	216.723
tca_01562	tca_01562	hypothetical protein	493.452	129.854	112.114	640.088	346.815	98.0653	161.643	85.5774	138.65
tca_01469	sfsA	Sugar fermentation stimulation protein A	493.287	531.045	426.764	506.404	480.169	631.757	430.334	397.949	455.58
tca_00737	pheT_1	Phenylalanine--tRNA ligase beta subunit	491.553	147.22	176.821	247.398	735.708	158.692	135.747	187.929	165.714
tca_00876	tca_00876	hypothetical protein	490.186	226.292	61.674	15.8725	964.5	81.2902	371.294	62.3456	61.0025
tca_01144	per	GDP-perosamine synthase	487.619	272.466	208.987	245.869	729.369	389.467	155.464	189.155	228.819
tca_00177	qacA	Antiseptic resistance protein	487.405	149.089	172.772	519.694	455.116	141.253	156.924	167.825	177.72
tca_01015	rpoC_3	DNA-directed RNA polymerase subunit beta'	486.238	396.811	231.408	503.154	469.322	341.242	452.379	236.956	225.86
tca_01384	tca_01384	hypothetical protein	484.864	843.436	1054.08	242.15	727.578	904.825	782.046	1050.4	1057.76
tca_01273	tca_01273	hypothetical protein	484.355	243.297	191.902	469.269	499.442	231.09	255.504	185.901	197.903
tca_01159	prcB_2	Proteasome subunit beta	484.349	55.7708	92.2292	289.202	679.495	0	111.542	79.9972	104.461
tca_00404	kaiC_1	Circadian clock protein kinase KaiC	483.051	289.465	253.561	162.477	803.624	399.295	179.634	268.375	238.746
tca_01001	tca_01001	hypothetical protein	480.81	12.6814	68.2544	475.056	486.563	0	25.3628	71.6378	64.871
tca_01243	tca_01243	hypothetical protein	480.239	396.005	323.703	495.306	465.173	485.657	306.353	315.119	332.288
tca_01372	tca_01372	hypothetical protein	475.987	258.001	491.608	513.137	438.837	267.718	248.284	512.52	470.696
tca_00018	rpsH	30S ribosomal protein S8	475.002	156.004	89.2123	433.393	516.61	142.282	169.726	89.9116	88.513
tca_00071	tca_00071	hypothetical protein	474.455	172.531	240.128	438.634	510.275	132.144	212.918	245.519	234.737
tca_01645	tca_01645	hypothetical protein	471.123	139.413	282.447	513.651	428.595	94.4332	184.393	233.015	331.879
tca_01141	tufB	Elongation factor Tu-B	469.008	156.407	255.277	596.61	341.406	175.936	136.878	264.917	245.638
tca_01480	tca_01480	hypothetical protein	468.907	1601.59	926.445	29.6654	908.149	1827.06	1376.13	800.89	1052
tca_00394	tca_00394	hypothetical protein	468.29	114.755	159.48	296.428	640.152	83.4143	146.096	152.278	166.682
tca_00538	tca_00538	hypothetical protein	466.346	80.975	143.689	239.704	692.988	38.223	123.727	139.241	148.138
tca_00209	tca_00209	hypothetical protein	462.17	194.869	231.436	467.152	457.188	118.858	270.88	209.175	253.698
tca_01161	purM	Phosphoribosylformylglycinamidine cyclo-ligase	459.315	607.562	504.972	720.02	198.609	595.252	619.872	486.149	523.795
tca_01415	yafJ_2	Putative glutamine amidotransferase YafJ	458.075	1660.89	961.703	301.023	615.126	1637.68	1684.1	995.635	927.771
tca_00802	tca_00802	hypothetical protein	457.57	343.764	3812.88	747.968	167.173	241.464	446.063	3996.57	3629.19
tca_01619	ureG	Urease accessory protein UreG	457.125	517.953	347.155	403.018	511.231	420.28	615.627	360.671	333.64
tca_01420	tca_01420	NAD(P)H dehydrogenase (quinone)	455.484	344.09	319.463	0	910.968	216.678	471.502	336.801	302.124
tca_01277	tca_01277	hypothetical protein	452.844	17.9974	113.975	285.95	619.738	0	35.9948	128.138	99.8114
tca_01269	tca_01269	Bifunctional NMN adenylyltransferase/Nudix hydrolase	452.275	833.389	1047.98	203.95	700.601	760.624	906.154	1049.32	1046.63
tca_00856	dnaG	DNA primase	452.226	518.633	505.584	174.265	730.188	337.544	699.722	543.097	468.07
tca_00825	obg_1	GTPase Obg	451.658	3077.74	10512.5	641.987	261.329	5670.08	485.41	10345.7	10679.3
tca_01662	cpcE_2	Phycocyanobilin lyase subunit alpha	451.223	448.859	290.436	550.986	351.46	411.109	486.609	310.708	270.163
tca_00842	tca_00842	hypothetical protein	450.628	74.8646	104.586	195.504	705.751	80.2296	69.4996	99.3701	109.803
tca_00332	pglJ	N-acetylgalactosamine-N,N'-diacetylbacillosaminyl-diphospho-undecaprenol 4-alpha-N-acetylgalactosaminyltransferase	450.609	178.507	64.701	365.319	535.9	39.0894	317.925	69.6135	59.7884
tca_01255	tca_01255	hypothetical protein	449.837	712.95	624.096	0	899.675	460.878	965.022	569.954	678.238
tca_01112	yrbG_2	Inner membrane protein YrbG	448.662	60.6785	77.379	660.822	236.501	66.2259	55.1311	79.8513	74.9068
tca_01649	tca_01649	Putative conjugal transfer protein	448.525	389.139	359.837	275.254	621.796	278.048	500.231	364.295	355.379
tca_00663	tca_00663	hypothetical protein	447.952	50.8074	12.4729	122.37	773.534	74.9911	26.6236	6.76981	18.1759
tca_01383	tca_01383	hypothetical protein	447.701	808.597	515.576	214.393	681.009	559.561	1057.63	519.651	511.502
tca_00967	rny_1	Ribonuclease Y	447.554	715.227	428.944	440.272	454.836	539.619	890.835	461.159	396.729
tca_00163	tca_00163	hypothetical protein	440.452	393.764	282.68	437.955	442.95	355.722	431.805	275.042	290.319
tca_01143	tca_01143	hypothetical protein	439.391	1923.25	1219.18	166.423	712.358	1639.09	2207.4	1222.99	1215.36
tca_00044	rpsB	30S ribosomal protein S2	437.982	39.0437	26.2011	669.037	206.927	18.3036	59.7837	19.2775	33.1246
tca_01567	tca_01567	hypothetical protein	437.098	37.1781	135.126	84.052	790.143	16.5565	57.7998	131.362	138.89
tca_00936	nadX	L-aspartate dehydrogenase	436.877	180.737	218.46	65.5208	808.234	172.083	189.39	209.029	227.891
tca_01091	mvhG	Methyl viologen-reducing hydrogenase subunit gamma	434.162	452.227	365.641	341.104	527.219	198.035	706.419	395.293	335.99
tca_01723	kcsA_2	pH-gated potassium channel KcsA	432.872	146.344	202.783	504.312	361.433	84.2875	208.4	192.763	212.804
tca_01852	selA	L-seryl-tRNA(Sec) selenium transferase	430.43	69.3505	115.447	631.057	229.803	71.3067	67.3942	124.627	106.267
tca_00147	tca_00147	hypothetical protein	429.619	101.508	239.85	521.375	337.862	32.864	170.151	234.212	245.489
tca_01232	tca_01232	hypothetical protein	427.843	73.5621	101.419	445.414	410.271	74.4437	72.6806	132.168	70.6694
tca_00830	tca_00830	hypothetical protein	427.519	288.228	1161.53	445.776	409.263	305.704	270.753	1197.45	1125.61
tca_01120	mtrE	Tetrahydromethanopterin S-methyltransferase subunit E	427.193	231.807	375.816	262.378	592.007	206.732	256.882	377.92	373.712
tca_00550	tca_00550	hypothetical protein	426.399	187.773	147.943	437.494	415.303	234.402	141.145	158.774	137.113
tca_00419	ykoD_1	Putative HMP/thiamine import ATP-binding protein YkoD	426.078	559.97	364.746	345.994	506.163	604.294	515.646	337.205	392.288
tca_00011	tca_00011	hypothetical protein	425.588	551.56	285.169	413.106	438.069	108.498	994.623	318.325	252.014
tca_01430	tca_01430	hypothetical protein	424.2	404.599	417.574	282.672	565.728	380.483	428.716	406.103	429.044
tca_01486	purB	Adenylosuccinate lyase	422.455	113.759	183.73	295.863	549.047	93.8936	133.625	186.185	181.275
tca_00536	aroD	3-dehydroquinate dehydratase	422.392	154.975	77.4053	599.722	245.062	88.5995	221.35	89.8576	64.953
tca_01030	tca_01030	hypothetical protein	422.242	186.281	315.524	80.9844	763.5	207.379	165.183	343.86	287.188
tca_01503	fwdF	Tungsten formylmethanofuran dehydrogenase subunit F	417.669	77.6939	100.896	649.842	185.497	47.8719	107.516	98.2074	103.585
tca_00330	pdtaS_4	putative sensor histidine kinase pdtaS	417.318	234.938	71.849	443.161	391.474	110.156	359.72	64.3567	79.3414
tca_00925	mmgD_1	2-methylcitrate synthase	416.031	278.374	145.764	730.444	101.617	248.877	307.87	141.981	149.547
tca_00723	rbr1	Rubrerythrin-1	414.853	1778.19	1905.91	142.242	687.465	1591.46	1964.92	1914.57	1897.26
tca_01378	tca_01378	hypothetical protein	413.726	143.215	87.9258	518.451	309	204.248	82.1814	79.5928	96.2588
tca_00824	tca_00824	hypothetical protein	412.527	612.356	2324.59	804.808	20.2459	1113.49	111.224	2440.87	2208.3
tca_01061	ino1	Inositol-3-phosphate synthase	412.399	51.3375	97.4392	575.963	248.835	23.8848	78.7901	103.138	91.7404
tca_01592	tca_01592	hypothetical protein	412.144	382.063	363.62	547.444	276.844	383.413	380.713	373.527	353.713
tca_01012	tca_01012	hypothetical protein	411.744	5.31431	38.6426	0	823.488	0	10.6286	46.2449	31.0402
tca_00560	kaiC_2	Circadian clock protein kinase KaiC	408.779	207.719	196.099	0	817.559	178.074	237.364	183.457	208.74
tca_00450	tca_00450	hypothetical protein	408.141	40.6978	140.019	295.076	521.207	38.7492	42.6464	148.552	131.485
tca_01435	nfo_3	endonuclease 4	407.272	155.213	123.766	510.363	304.18	134.041	176.385	131.352	116.181
tca_01345	tca_01345	Glucosyl-3-phosphoglycerate synthase	405.538	335.531	291.562	422.194	388.883	362.308	308.753	299.837	283.287
tca_00523	rep	ATP-dependent DNA helicase Rep	405.053	129.856	138.726	636.59	173.516	116.012	143.7	123.801	153.651
tca_00808	eamA	putative amino-acid metabolite efflux pump	404.815	338.241	12604.6	474.451	335.179	265.993	410.489	12856.4	12352.9
tca_01492	thiC_1	Phosphomethylpyrimidine synthase	401.554	162.975	132.771	549.63	253.479	137.64	188.311	142.135	123.406
tca_00398	tca_00398	hypothetical protein	396.675	327.835	388.864	0	793.35	346.898	308.772	360.136	417.593
tca_01279	tca_01279	hypothetical protein	396.293	1510.95	1020.51	285.95	506.636	1674.76	1347.14	982.391	1058.64
tca_01054	tca_01054	hypothetical protein	394.148	254.228	314.476	0	788.296	435.258	73.197	338.746	290.205
tca_01165	polB_2	DNA polymerase II	393.946	165.933	118.868	305.013	482.88	165.223	166.643	120.228	117.508
tca_00290	tca_00290	hypothetical protein	392.42	16.549	175.712	326.319	458.521	5.71361	27.3843	174.511	176.912
tca_00053	tca_00053	hypothetical protein	391.394	46.7085	122.143	426.725	356.064	52.3015	41.1155	116.464	127.822
tca_00391	tca_00391	hypothetical protein	390.745	724.833	647.138	0	781.49	639.585	810.08	639.285	654.99
tca_01830	fom3_3	2-hydroxyethylphosphonate methyltransferase	389.732	176.221	187.984	448.382	331.082	153.365	199.077	200.176	175.792
tca_00544	tca_00544	hypothetical protein	389.034	37.9688	66.2259	531.49	246.578	34.8975	41.04	67.0766	65.3753
tca_00940	tca_00940	hypothetical protein	388.603	173.407	181.032	122.821	654.384	177.417	169.398	159.111	202.953
tca_00899	dtxR	Diphtheria toxin repressor	388.161	250.14	141.44	546.338	229.984	110.377	389.904	167.399	115.481
tca_00664	tca_00664	hypothetical protein	384.45	185.698	130.563	337.137	431.763	221.363	150.034	134.798	126.328
tca_00588	tca_00588	hypothetical protein	382.859	279.307	251.883	243.843	521.874	216.144	342.471	234.389	269.377
tca_01595	garB	Glutathione amide reductase	382.721	477.572	351.628	311.071	454.371	514.024	441.12	358.167	345.088
tca_01479	tca_01479	hypothetical protein	382.672	36.5279	57.2708	143.468	621.876	25.1202	47.9356	64.819	49.7226
tca_01672	pstS1_1	Phosphate-binding protein PstS 1	381.417	657.061	270.328	550.664	212.169	474.051	840.071	261.202	279.455
tca_01749	tca_01749	Hydrolase	380.019	66.9396	69.7743	548.647	211.392	82.7217	51.1575	61.8293	77.7193
tca_00617	smc	Chromosome partition protein Smc	376.641	75.1811	86.8147	572.51	180.772	72.5893	77.7729	96.6566	76.9728
tca_00931	tca_00931	hypothetical protein	376.219	189.872	271.912	393.689	358.749	164.497	215.247	301.948	241.877
tca_01176	tca_01176	hypothetical protein	375.363	108.225	143.752	297.667	453.059	56.8574	159.593	166.923	120.582
tca_00685	guaA_1	GMP synthase [glutamine-hydrolyzing]	375.254	355.746	374.55	389.819	360.688	291.394	420.098	407.262	341.838
tca_00626	tca_00626	hypothetical protein	373.813	46.2489	69.4259	406.549	341.076	39.6103	52.8876	62.3954	76.4563
tca_00079	tca_00079	hypothetical protein	373.562	96.0403	174.51	270.606	476.518	53.3038	138.777	208.341	140.679
tca_00652	tca_00652	hypothetical protein	373.509	156.632	124.446	387.03	359.989	84.7076	228.556	119.548	129.345
tca_01817	tca_01817	hypothetical protein	373.043	75.151	45.2775	443.794	302.291	74.9299	75.372	55.2417	35.3132
tca_01820	kdsD	Arabinose 5-phosphate isomerase KdsD	372.809	67.0191	98.0375	122.37	623.247	58.9216	75.1167	121.857	74.2184
tca_01773	niaR	putative transcription repressor NiaR	371.279	351.844	833.467	396.245	346.313	393.653	310.034	828.244	838.689
tca_01819	tca_01819	hypothetical protein	370.104	135.03	97.1822	397.536	342.673	109.154	160.906	106.465	87.8996
tca_01760	tca_01760	hypothetical protein	369.91	86.2568	183.043	177.046	562.775	139.497	33.0165	223.644	142.443
tca_01651	ecfA3_2	Energy-coupling factor transporter ATP-binding protein EcfA3	369.464	94.0703	114.761	149.482	589.447	113.417	74.7238	122.208	107.314
tca_00183	tca_00183	hypothetical protein	368.979	159.013	270.964	0	737.959	60.2884	257.738	267.742	274.185
tca_00380	asnB	Asparagine synthetase B [glutamine-hydrolyzing]	368.58	553.015	395.519	343.018	394.142	434.916	671.113	418.141	372.897
tca_01158	tca_01158	hypothetical protein	368.488	40.0439	126.507	350.524	386.451	14.0093	66.0784	117.195	135.82
tca_00573	tca_00573	Putative nickel-responsive regulator	368.363	121.739	207.894	260.036	476.69	170.739	72.7396	209.794	205.994
tca_00508	korA_1	2-oxoglutarate oxidoreductase subunit KorA	365.483	287.925	347.715	309.299	421.667	200.464	375.385	364.58	330.85
tca_00954	guaB_5	Inosine-5'-monophosphate dehydrogenase	364.974	297.381	351.169	295.076	434.872	309.994	284.768	323.223	379.116
tca_01768	mscS	Small-conductance mechanosensitive channel	364.795	117.588	135.284	556.971	172.618	160.91	74.2651	144.821	125.747
tca_00338	mshA_2	D-inositol 3-phosphate glycosyltransferase	364.642	36.7292	35.6795	592.304	136.98	30.3535	43.1049	37.5631	33.7959
tca_01226	tca_01226	hypothetical protein	364.358	23.9255	37.3266	616.381	112.335	7.35843	40.4925	37.1998	37.4534
tca_00561	kaiC_3	Circadian clock protein kinase KaiC	363.874	226.468	181.883	237.07	490.679	224.149	228.788	197.385	166.38
tca_00501	glmU_1	Bifunctional protein GlmU	363.527	481.312	939.748	151.984	575.069	442.413	520.211	977.45	902.046
tca_00971	nfo_2	endonuclease 4	362.314	99.462	108.284	281.391	443.237	60.7071	138.217	91.1799	125.388
tca_00386	pglB_1	Undecaprenyl-diphosphooligosaccharide--protein glycotransferase	362.09	247.894	296.866	368.192	355.989	277.211	218.576	314.82	278.912
tca_00346	tca_00346	hypothetical protein	359.849	45.5169	24.06	455.738	263.959	30.9555	60.0783	24.7779	23.3421
tca_01237	hisE	Phosphoribosyl-ATP pyrophosphatase	359.748	262.408	414.128	400.33	319.165	150.203	374.613	384.414	443.842
tca_00159	mnmC	tRNA 5-methylaminomethyl-2-thiouridine biosynthesis bifunctional protein MnmC	358.189	70.4322	48.4675	486.617	229.761	56.5991	84.2653	56.1493	40.7857
tca_01566	tca_01566	hypothetical protein	357.869	63.138	94.8594	426.725	289.013	46.6978	79.5783	62.9535	126.765
tca_01128	tca_01128	putative cation efflux system protein	356.575	61.3986	60.1932	299.126	414.025	66.0636	56.7337	59.8	60.5864
tca_01211	argG	Argininosuccinate synthase	356.351	353.862	435.056	13.8686	698.833	356.958	350.766	427.739	442.372
tca_00139	tca_00139	Rubredoxin	355.991	841.108	796.351	205.46	506.521	350.752	1331.46	829.762	762.94
tca_00755	sdcS	Sodium-dependent dicarboxylate transporter SdcS	355.461	73.5071	52.9526	524.757	186.166	77.1144	69.8999	49.7673	56.1379
tca_00966	tca_00966	hypothetical protein	354.366	368.296	42.4434	0	708.732	405.909	330.683	36.2389	48.648
tca_01555	tca_01555	hypothetical protein	352.37	257.449	211.015	268.424	436.316	164.497	350.401	232.649	189.381
tca_01739	tca_01739	hypothetical protein	352.194	269.576	240.845	367.601	336.787	118.489	420.663	242.191	239.499
tca_01123	mcrC	Methyl-coenzyme M reductase operon protein C	350.497	223.259	114.116	250.889	450.105	168.394	278.124	116.436	111.796
tca_00926	ttdA_1	L(+)-tartrate dehydratase subunit alpha	350.435	171.961	125.986	572.51	128.359	181.473	162.449	137.613	114.36
tca_00655	tca_00655	hypothetical protein	350.376	303.293	281.809	246.552	454.199	283.3	323.287	252.339	311.28
tca_01520	glnA	Glutamine synthetase	350.08	199.52	295.61	162.791	537.368	147.999	251.04	310.362	280.858
tca_01074	rplP	50S ribosomal protein L16	348.704	354.68	253.135	344.561	352.847	158.366	550.993	199.198	307.071
tca_00883	fmdB	Molybdenum formylmethanofuran dehydrogenase, subunit B	348.147	25.02	45.0558	482.385	213.909	45.0094	5.03055	23.1754	66.9362
tca_01648	trm1_2	tRNA (guanine(26)-N(2))-dimethyltransferase	347.51	34.6013	91.6624	301.298	393.722	34.9114	34.2911	91.187	92.1378
tca_00907	tca_00907	hypothetical protein	346.594	364.263	394.578	363.104	330.084	323.182	405.343	410.128	379.029
tca_00813	argC	N-acetyl-gamma-glutamyl-phosphate reductase	346.025	8090.6	9127.31	447.106	244.945	850.262	15330.9	9555.53	8699.09
tca_01265	tca_01265	hypothetical protein	345.912	86.2573	101.353	337.67	354.154	79.1832	93.3315	88.0665	114.64
tca_00571	tca_00571	hypothetical protein	343.59	244.577	225.797	398.959	288.221	159.668	329.487	218.087	233.507
tca_01283	prmC	Release factor glutamine methyltransferase	343.107	128.857	80.074	478.712	207.502	155.312	102.402	91.1348	69.0131
tca_00242	tca_00242	hypothetical protein	342.034	138.547	86.629	416.057	268.011	97.1313	179.963	80.5608	92.6972
tca_00026	secY	Protein translocase subunit SecY	341.568	146.207	105.084	183.285	499.852	163.668	128.745	103.088	107.08
tca_01156	tca_01156	hypothetical protein	341.347	103.3	114.967	242.511	440.184	115.443	91.1563	120.747	109.188
tca_00413	pdtaR_1	putative transcriptional regulatory protein pdtaR	340.739	142.139	120.941	319.277	362.201	120.541	163.737	115.915	125.967
tca_01333	tca_01333	hypothetical protein	339.555	271.553	234.631	280.882	398.228	181.353	361.754	236.325	232.938
tca_00697	tca_00697	hypothetical protein	338.551	278.587	727.646	184.914	492.189	388.525	168.648	750.622	704.67
tca_01644	tca_01644	hypothetical protein	336.477	31.008	113.092	383.463	289.492	26.8566	35.1593	101.828	124.356
tca_01438	mggB	Mannosylglucosyl-3-phosphoglycerate phosphatase	335.91	264.902	147.86	350.364	321.455	242.317	287.487	149.573	146.147
tca_00116	cbiQ	Cobalt transport protein CbiQ	335.337	251.902	223.061	371.285	299.39	152.007	351.797	227.153	218.97
tca_01326	natB	ABC transporter permease protein NatB	334.695	109.895	101.412	458.587	210.802	114.615	105.176	102.299	100.525
tca_01448	pheS_2	Phenylalanine--tRNA ligase alpha subunit	334.681	488.759	267.66	364.278	305.085	394.995	582.523	291.064	244.255
tca_00769	ask	Aspartokinase	333.586	112.259	71.6724	340.751	326.421	55.4866	169.031	76.536	66.8088
tca_00210	tca_00210	hypothetical protein	333.103	81.5271	87.4597	374.51	291.695	76.8444	86.2098	95.8248	79.0947
tca_00069	tca_00069	hypothetical protein	332.872	19.7207	50.0148	485.4	180.344	27.3182	12.1233	57.5434	42.4862
tca_00176	gltA_2	Glutamate synthase [NADPH] large chain	331.902	200.586	202.367	321.751	342.052	198.148	203.024	202.86	201.874
tca_00168	hicd_1	Homoisocitrate dehydrogenase	330.061	95.0459	66.2068	517.983	142.139	107.517	82.5745	53.6148	78.7988
tca_01624	secE	Protein translocase subunit SecE	329.268	30.7486	77.8444	92.4572	566.079	48.5657	12.9315	76.7246	78.9643
tca_01556	pdtaR_4	putative transcriptional regulatory protein pdtaR	328.521	104.295	94.7588	287.161	369.882	109.701	98.8878	106.151	83.3669
tca_00719	rbn_1	Ribonuclease BN	328.351	129.587	101.165	524.167	132.536	108.986	150.188	91.2237	111.107
tca_00645	tca_00645	hypothetical protein	327.84	301.89	429.445	0	655.681	70.6969	533.082	456.463	402.427
tca_00416	bchI_1	Magnesium-chelatase 38 kDa subunit	327.144	97.4165	75.6547	178.042	476.246	100.905	93.928	84.5007	66.8088
tca_00241	selB	Selenocysteine-specific elongation factor	325.38	266.799	120.21	461.155	189.604	249.359	284.24	121.559	118.862
tca_00736	tca_00736	hypothetical protein	324.998	135.163	209.399	168.672	481.323	189.505	80.8217	226.026	192.771
tca_00032	truB	tRNA pseudouridine synthase B	324.88	232.263	157.914	294.707	355.052	170.739	293.787	177.426	138.402
tca_01053	blh	Beta-lactamase hydrolase-like protein	324.531	193.927	253.288	73.9657	575.097	372.337	15.5178	259.841	246.735
tca_00140	rd	Rubredoxin	324.107	1325.28	1172.01	102.73	545.485	741.975	1908.59	1275.9	1068.12
tca_00385	pyrG	CTP synthase	323.325	215.308	271.303	155.827	490.824	196.445	234.171	291.094	251.513
tca_00659	tca_00659	hypothetical protein	323.035	520.702	374.352	95.2348	550.836	243.871	797.534	374.732	373.972
tca_00780	tca_00780	hypothetical protein	320.92	72.0453	49.4858	401.019	240.821	48.2731	95.8176	44.3708	54.6008
tca_00803	tca_00803	hypothetical protein	320.468	114.923	1624.31	504.312	136.624	48.1643	181.682	1629.6	1619.01
tca_00618	tca_00618	hypothetical protein	319.851	110.907	220.797	363.766	275.936	11.9424	209.872	238.978	202.617
tca_01499	moaA_3	Cyclic pyranopterin monophosphate synthase	318.763	98.8815	190.211	398.835	238.69	97.6075	100.156	186.546	193.877
tca_01337	recA_1	Protein RecA	317.23	414.26	192.671	373.385	261.075	516.01	312.511	180.008	205.334
tca_00832	tca_00832	hypothetical protein	316.809	78.9652	485.355	457.798	175.821	61.8859	96.0445	478.225	492.485
tca_01618	rsxB_4	Electron transport complex subunit RsxB	316.113	738.72	478.18	73.6384	558.587	605.996	871.444	502.444	453.916
tca_00169	tca_00169	hypothetical protein	315.845	313.597	400.87	288.178	343.512	201.043	426.151	416.505	385.235
tca_00787	fbiC_1	FO synthase	315.748	171.274	244.042	149.124	482.371	152.747	189.801	249.974	238.111
tca_00186	tca_00186	hypothetical protein	315.729	103.731	213.656	439.005	192.453	0	207.462	197.607	229.705
tca_01604	trpG	Anthranilate synthase component 2	315.215	32.4273	73.315	197.117	433.314	22.1874	42.6673	118.397	28.2327
tca_01813	tca_01813	hypothetical protein	314.807	166.13	216.55	360.808	268.805	112.53	219.73	219.569	213.53
tca_01059	tca_01059	hypothetical protein	314.566	33.113	67.6465	441.273	187.858	66.2259	0	69.7496	65.5435
tca_01696	tca_01696	hypothetical protein	314.346	37.7122	51.4178	392.626	236.067	43.2434	32.1811	58.1565	44.679
tca_00703	murE	UDP-N-acetylmuramoyl-L-alanyl-D-glutamate--L-lysine ligase	312.741	452.357	215.552	389.5	235.982	409.192	495.523	201.443	229.661
tca_00774	trxA	Thioredoxin	312.346	60.1464	353.774	387.03	237.662	0	120.293	388.976	318.572
tca_01660	acsC_2	Corrinoid/iron-sulfur protein large subunit	310.62	108.04	162.118	362.577	258.663	112.685	103.395	182.869	141.368
tca_00857	ruvB_2	Holliday junction ATP-dependent DNA helicase RuvB	310.453	156.093	265.063	0	620.905	134.958	177.228	276.942	253.184
tca_00875	tca_00875	hypothetical protein	310.403	337.383	427.061	178.949	441.856	372.635	302.132	416.505	437.618
tca_00726	tca_00726	hypothetical protein	309.793	284.415	581.573	0	619.586	268.154	300.677	578.023	585.123
tca_01354	tca_01354	hypothetical protein	309.635	90.5017	79.2799	349.838	269.433	91.881	89.1223	84.3279	74.232
tca_01063	cfiA	2-oxoglutarate carboxylase large subunit	309.521	81.4344	172.599	360.729	258.313	116.506	46.3624	171.788	173.411
tca_01357	tca_01357	hypothetical protein	309.309	119.175	162.861	267.346	351.272	48.2731	190.077	139.583	186.139
tca_00081	tca_00081	hypothetical protein	309.125	40.5244	52.2112	291.97	326.28	9.58533	71.4634	39.3718	65.0507
tca_00393	tca_00393	hypothetical protein	308.732	219.978	235.884	0	617.463	160.267	279.689	231.051	240.718
tca_00442	ydaP	Putative thiamine pyrophosphate-containing protein YdaP	308.186	447.611	444.293	273.465	342.907	405.284	489.939	417.122	471.465
tca_01270	tca_01270	hypothetical protein	307.138	483.49	309.406	166.423	447.854	451.661	515.319	331.45	287.361
tca_01320	tca_01320	hypothetical protein	306.806	227.064	346.916	504.312	109.299	147.169	306.959	319.298	374.534
tca_00182	cbiM_2	Cobalt transport protein CbiM	306.683	110.809	246.435	26.6703	586.696	91.0606	130.558	229.436	263.434
tca_00528	tca_00528	hypothetical protein	306.667	133.722	145.973	493.105	120.229	129.508	137.936	150.039	141.907
tca_00135	metN	Methionine import ATP-binding protein MetN	304.331	415.727	230.767	282.734	325.929	378.966	452.488	246.489	215.044
tca_01808	mtnA	Methylthioribose-1-phosphate isomerase	303.712	74.607	58.8867	214.739	392.684	91.6481	57.5659	49.9947	67.7786
tca_00430	tca_00430	hypothetical protein	302.868	109.04	82.7179	410.921	194.816	107.924	110.157	73.8829	91.5528
tca_01182	guaB_8	Inosine-5'-monophosphate dehydrogenase	302.097	123.928	95.3184	123.276	480.917	121.414	126.441	98.3211	92.3157
tca_00482	pcrA	ATP-dependent DNA helicase PcrA	302.047	118.328	135.911	339.248	264.846	137.414	99.2416	149.22	122.603
tca_00714	ndhI_2	NAD(P)H-quinone oxidoreductase subunit I, chloroplastic	301.681	1282.54	1624.11	385.238	218.124	1995.75	569.344	1643.18	1605.03
tca_00324	tca_00324	hypothetical protein	301.679	348.212	190.507	130.309	473.05	254.236	442.187	183.315	197.699
tca_00745	tca_00745	hypothetical protein	301.352	41.8745	39.2269	401.764	200.94	30.4381	53.3108	44.0258	34.4279
tca_01126	tca_01126	hypothetical protein	300.783	551.15	318.242	280.038	321.527	401.017	701.284	300.259	336.225
tca_01057	tmk_1	Thymidylate kinase	300.18	91.3576	170.498	331.19	269.17	108.729	73.9861	153.449	187.547
tca_00653	tca_00653	hypothetical protein	299.441	194.015	185.334	142.242	456.64	126.084	261.945	201.648	169.021
tca_00012	rpsQ	30S ribosomal protein S17	297.912	160.395	202.893	466.606	129.218	47.6579	273.132	203.643	202.143
tca_01485	tca_01485	hypothetical protein	297.738	258.508	257.894	0	595.475	41.235	475.781	309.794	205.994
tca_00203	cpgS	Cyclic 2,3-diphosphoglycerate synthetase	297.1	200.29	148.764	191.704	402.495	162.06	238.52	164.055	133.473
tca_00981	tca_00981	hypothetical protein	296.885	275.756	99.6228	300.6	293.17	168.664	382.848	96.7561	102.49
tca_00120	tca_00120	Undecaprenyl-phosphate mannosyltransferase	295.843	122.766	111.573	452.365	139.321	56.2778	189.255	109.983	113.164
tca_00151	sumT	Uroporphyrinogen-III C-methyltransferase	295.322	705.339	473.686	185.688	404.956	713.245	697.434	452.643	494.73
tca_00541	tca_00541	hypothetical protein	295.007	13.1709	176.374	0	590.014	0	26.3419	156.291	196.457
tca_00572	cbiF	Cobalt-precorrin-4 C(11)-methyltransferase	294.902	101.218	138.591	384.924	204.88	101.096	101.341	133.407	143.775
tca_00733	aroA	3-phosphoshikimate 1-carboxyvinyltransferase	294.472	253.449	249.706	316.996	271.947	225.483	281.414	251.73	247.683
tca_01582	ubiC	Chorismate pyruvate-lyase	294.055	245.952	165.481	215.733	372.377	279.253	212.651	176.466	154.495
tca_01109	glmU_2	Bifunctional protein GlmU	293.988	155.904	203.75	446.949	141.027	162.269	149.539	192.72	214.78
tca_00397	tca_00397	hypothetical protein	293.233	479.59	504.946	48.876	537.589	571.235	387.944	548.902	460.991
tca_00524	pcrB	Heptaprenylglyceryl phosphate synthase	292.749	144.324	186.335	157.854	427.645	168.795	119.853	178.4	194.271
tca_00729	tca_00729	hypothetical protein	291.494	212.474	124.444	259.024	323.964	181.413	243.534	115.833	133.054
tca_00339	tca_00339	hypothetical protein	291.382	7.85891	29.2884	398.434	184.329	0	15.7178	5.08671	53.4901
tca_00991	tca_00991	hypothetical protein	290.837	62.1452	40.4355	322.257	259.416	93.7055	30.5848	48.3906	32.4803
tca_01078	tca_01078	hypothetical protein	290.686	145.35	227.797	143.468	437.904	106.761	183.939	246.048	209.545
tca_00689	tca_00689	hypothetical protein	289.49	67.8255	217.32	204.007	374.972	93.7654	41.8855	213.787	220.853
tca_01542	tca_01542	hypothetical protein	289.354	58.3789	121.054	84.9096	493.799	40.8844	75.8735	137.008	105.099
tca_00970	tca_00970	hypothetical protein	289.34	478.512	172.819	98.4751	480.206	338.379	618.645	167.069	178.569
tca_01839	tca_01839	hypothetical protein	288.711	149.663	87.88	190.879	386.544	109.664	189.662	97.3494	78.4105
tca_01364	tca_01364	hypothetical protein	288.705	52.6549	73.713	246.231	331.18	62.7676	42.5422	70.5145	76.9115
tca_00976	glnQ	Glutamine transport ATP-binding protein GlnQ	288.36	138.518	238.287	225.589	351.132	121.19	155.847	258.396	218.178
tca_01267	tca_01267	hypothetical protein	288.127	100.156	83.1456	244.74	331.515	107.13	93.1827	102.676	63.6157
tca_01221	trkH	Trk system potassium uptake protein TrkH	288.07	65.0962	56.0492	314.005	262.135	65.6706	64.5218	58.5487	53.5497
tca_01058	tca_01058	hypothetical protein	288.03	35.7918	84.544	326.319	249.741	61.5998	9.98386	81.2378	87.8503
tca_00289	mepA	Multidrug export protein MepA	287.408	818.097	601.409	282.907	291.909	773.712	862.481	641.016	561.801
tca_00955	teaD_2	TRAP-T-associated universal stress protein TeaD	287.39	730.467	331.191	115.571	459.209	430.009	1030.93	359.114	303.269
tca_00765	bcrC	Undecaprenyl-diphosphatase BcrC	286.911	46.1941	46.9523	0	573.821	46.7477	45.6405	41.0292	52.8754
tca_01812	tca_01812	27-O-demethylrifamycin SV methyltransferase	286.563	117.829	211.856	354.091	219.035	162.747	72.9115	208.952	214.759
tca_01449	nadB	L-aspartate oxidase	285.636	337.175	348.996	220.693	350.578	219.995	454.356	352.683	345.31
tca_00547	tam	Trans-aconitate 2-methyltransferase	285.022	331.506	314.588	237.323	332.72	183.095	479.917	337.26	291.916
tca_01753	tca_01753	hypothetical protein	284.483	152.302	135.895	209.903	359.063	185.075	119.529	128.151	143.639
tca_00162	cpdA_1	3',5'-cyclic adenosine monophosphate phosphodiesterase CpdA	283.954	217.724	203.951	250.089	317.819	2.98559	432.463	196.843	211.059
tca_00125	tca_00125	hypothetical protein	281.628	35.7301	25.1442	468.137	95.1181	33.8115	37.6486	18.129	32.1594
tca_01558	pfdA	Prefoldin subunit alpha	281.059	93.4502	56.5545	390.664	171.454	66.6923	120.208	59.4345	53.6744
tca_00969	top6A	Type 2 DNA topoisomerase 6 subunit A	280.866	114.223	86.6248	329.085	232.647	121.414	107.032	87.1279	86.1217
tca_00114	cbiM_1	Cobalt transport protein CbiM	280.06	254.175	200.968	248.764	311.356	101.269	407.081	220.884	181.053
tca_00045	tca_00045	hypothetical protein	279.791	140.869	80.3831	99.0612	460.521	127.485	154.254	78.3687	82.3975
tca_01339	dmdA_1	2,3-dimethylmalate dehydratase large subunit	279.575	225.179	198.815	356.62	202.529	223.749	226.609	199.484	198.146
tca_01358	cpdA_3	3',5'-cyclic adenosine monophosphate phosphodiesterase CpdA	278.978	45.3586	48.8729	367.532	190.425	37.7063	53.011	50.832	46.9137
tca_01831	tca_01831	hypothetical protein	278.154	130.204	360.132	470.691	85.6178	141.282	119.126	379.438	340.826
tca_01427	leuA_2	2-isopropylmalate synthase	277.203	360.917	202.323	296.009	258.398	296.577	425.256	225.928	178.718
tca_00671	yknY	putative ABC transporter ATP-binding protein YknY	275.722	181.121	126.368	25.1015	526.343	224.149	138.092	116.649	136.086
tca_01847	tca_01847	hypothetical protein	273.147	408.107	157.454	257.166	289.127	676.623	139.591	169.963	144.946
tca_00648	tca_00648	hypothetical protein	272.292	111.226	125.967	353.207	191.376	57.2966	165.155	136.208	115.727
tca_01674	pstC	Phosphate transport system permease protein PstC	272.185	191.39	153.191	284.971	259.399	99.7925	282.987	149.771	156.612
tca_01171	tca_01171	hypothetical protein	271.827	196.221	160.39	328.958	214.695	123.705	268.738	164.203	156.577
tca_01222	trkA	Trk system potassium uptake protein TrkA	270.356	72.683	68.6739	76.6926	464.018	73.8556	71.5105	78.4924	58.8554
tca_00099	tca_00099	hypothetical protein	270.016	843.435	731.145	87.591	452.442	1019.88	666.992	675.176	787.113
tca_01013	rpoB_1	DNA-directed RNA polymerase subunit beta	269.646	402.245	22.514	118.489	420.802	46.6796	757.81	25.0286	19.9994
tca_01259	tca_01259	hypothetical protein	269.193	83.6209	104.875	100.341	438.045	84.7076	82.5342	93.1797	116.57
tca_00143	prxU	Selenocysteine-containing peroxiredoxin PrxU	267.644	234.651	230.083	96.8983	438.391	216.319	252.983	255.972	204.195
tca_01439	copA_1	putative copper-importing P-type ATPase A	266.837	277.726	220.357	126.078	407.595	195.918	359.534	221.455	219.259
tca_00510	tca_00510	hypothetical protein	266.792	92.0223	63.933	198.122	335.461	117.078	66.9666	61.6537	66.2123
tca_00625	tca_00625	hypothetical protein	266.194	83.9114	92.8472	413.338	119.051	62.8497	104.973	104.105	81.5897
tca_01407	tca_01407	hypothetical protein	266.184	195.489	208.952	134.574	397.794	135.486	255.493	211.354	206.549
tca_00997	sucC	Succinyl-CoA ligase [ADP-forming] subunit beta	265.945	45.4548	95.4953	287.981	243.908	41.7983	49.1113	116.135	74.8557
tca_00083	tca_00083	hypothetical protein	265.475	90.312	161.154	298.249	232.702	23.4995	157.124	158.399	163.909
tca_00537	lexA	LexA repressor	265.397	25.1692	42.5325	297.667	233.127	21.3215	29.017	50.9002	34.1648
tca_01291	argD	Acetylornithine aminotransferase	265.009	156.816	129.26	170.254	359.765	150.914	162.718	138.928	119.592
tca_00287	tca_00287	hypothetical protein	264.279	52.9947	51.6014	190.198	338.36	29.1394	76.8499	56.1185	47.0843
tca_01631	porD_1	Pyruvate synthase subunit PorD	263.25	231.536	144.328	175.466	351.034	242.828	220.244	152.329	136.327
tca_01065	tca_01065	hypothetical protein	262.553	415.337	621.197	0	525.106	827.587	3.08627	643.095	599.299
tca_01365	pyrB	Aspartate carbamoyltransferase catalytic chain	259.862	138.246	58.1076	319.021	200.702	100.079	176.413	64.2231	51.992
tca_01856	prmA_2	Ribosomal protein L11 methyltransferase	257.484	82.9624	117.974	338.575	176.393	71.8225	94.1023	110.224	125.724
tca_01842	tca_01842	hypothetical protein	256.823	75.8722	43.5699	315.707	197.938	59.2264	92.5179	53.6448	33.4949
tca_01263	tca_01263	hypothetical protein	256.226	277.286	382.876	0	512.453	143.309	411.263	367.272	398.48
tca_00603	tca_00603	hypothetical protein	255.244	88.5708	71.6355	144.945	365.543	119.395	57.7463	67.4301	75.8409
tca_01780	tca_01780	hypothetical protein	255.235	167.156	124.801	212.455	298.015	105.398	228.915	128.636	120.967
tca_00221	dnaX	DNA polymerase III subunit tau	255.181	163.692	192.611	139.12	371.241	164.423	162.961	208.287	176.935
tca_00171	ldh	L-lactate dehydrogenase	255.023	269.236	341.57	119.117	390.93	259.216	279.256	359.617	323.524
tca_01397	argS	Arginine--tRNA ligase	254.618	127.841	167.061	9.88847	499.348	148.034	107.647	178.067	156.056
tca_00786	tca_00786	hypothetical protein	253.833	424.302	529.376	137.54	370.127	475.622	372.982	522.488	536.265
tca_01386	tca_01386	hypothetical protein	253.617	50.8844	63.0802	369.829	137.405	6.93795	94.8308	55.534	70.6264
tca_01027	nicS	HTH-type transcriptional repressor NicS	253.089	225.687	237.913	211.331	294.848	208.139	243.235	240.404	235.421
tca_00570	tca_00570	hypothetical protein	252.921	873.721	574.374	0	505.843	604.11	1143.33	540.815	607.933
tca_01031	iscS	Cysteine desulfurase IscS	251.608	225.482	331.411	220.136	283.079	277.518	173.446	336.939	325.884
tca_01740	tca_01740	hypothetical protein	251.462	44.7625	41.0686	295.863	207.062	55.0411	34.4839	38.1918	43.9453
tca_01083	pyrC_1	Dihydroorotase	250.61	157.512	80.7282	302.148	199.072	55.549	259.475	81.5721	79.8843
tca_01454	tca_01454	Ureidoglycolate lyase	250.222	118.206	173.701	215.017	285.428	141.179	95.2318	162.965	184.436
tca_00036	rpsK	30S ribosomal protein S11	249.693	66.6157	135.355	338.774	160.612	61.1705	72.0609	137.05	133.66
tca_00220	ruvB_1	Holliday junction ATP-dependent DNA helicase RuvB	248.855	170.08	190.358	81.5798	416.13	179.06	161.1	191.167	189.549
tca_01300	tca_01300	hypothetical protein	248.329	238.795	309.797	21.6979	474.96	122.522	355.068	324.704	294.891
tca_01579	cyaB	Adenylate cyclase CyaB	246.167	62.3937	70.8363	311.653	180.682	69.5744	55.213	56.0348	85.6379
tca_01534	yrrB_2	TPR repeat-containing protein YrrB	245.967	304.836	248.14	161.861	330.072	382.6	227.073	238.925	257.356
tca_00351	tca_00351	hypothetical protein	245.934	31.3148	36.6924	228.424	263.444	42.8521	19.7776	33.3977	39.987
tca_00643	tca_00643	hypothetical protein	245.928	129.087	150.945	98.1846	393.671	77.3612	180.812	172.461	129.43
tca_00301	tca_00301	hypothetical protein	244.818	365.94	627.65	180.894	308.741	589.914	141.965	652.993	602.308
tca_00138	tca_00138	hypothetical protein	244.2	41.9763	163.406	264.163	224.237	34.6898	49.2628	143.706	183.106
tca_01473	thiL_2	Thiamine-monophosphate kinase	243.738	324.312	167.2	367.379	120.097	249.261	399.363	174.79	159.611
tca_01587	ftsH_2	ATP-dependent zinc metalloprotease FtsH	243.514	379.584	336.621	113.988	373.04	442.081	317.087	338.008	335.234
tca_01502	fwdH	Tungsten formylmethanofuran dehydrogenase subunit H	242.978	60.3213	140.362	0	485.957	26.1731	94.4695	120.37	160.354
tca_00126	guaB_2	Inosine-5'-monophosphate dehydrogenase	241.842	103.165	84.8145	269.511	214.174	79.632	126.697	89.1496	80.4794
tca_01152	tca_01152	hypothetical protein	241.587	33.9914	51.4333	298.516	184.657	42.4677	25.515	52.9847	49.8819
tca_00551	tca_00551	RNA 2',3'-cyclic phosphodiesterase	241.57	187.59	126.137	89.9583	393.182	228.39	146.79	111.976	140.298
tca_01005	tpiA	Triosephosphate isomerase	241.309	17.9157	100.044	470.541	12.0766	26.0173	9.81407	191.811	8.27654
tca_00942	safD	Sulfoacetaldehyde dehydrogenase	241.146	68.8904	88.5924	200.226	282.067	38.6669	99.1139	87.9645	89.2202
tca_01028	tca_01028	hypothetical protein	240.844	670.825	1272.53	0	481.688	630.42	711.231	1232.51	1312.55
tca_01145	tca_01145	hypothetical protein	239.86	183.56	109.255	205.46	274.26	159.433	207.687	97.1328	121.377
tca_00601	galE	UDP-glucose 4-epimerase	239.568	235.821	252.906	323.316	155.819	0	471.642	279.597	226.214
tca_00037	rpoA	DNA-directed RNA polymerase subunit alpha	239.543	55.1418	144.583	293.072	186.015	0	110.284	143.026	146.139
tca_00474	tca_00474	hypothetical protein	239.449	323.695	195.459	204.738	274.161	298.308	349.082	209.543	181.376
tca_01281	tca_01281	hypothetical protein	238.29	71.8772	139.982	232.759	243.822	56.0373	87.717	137.353	142.611
tca_00188	tca_00188	hypothetical protein	238.036	23.691	22.4652	260.036	216.037	17.0739	30.3081	19.1811	25.7492
tca_00115	cbiN	Cobalt transport protein CbiN	236.388	241.59	279.119	0	472.777	68.2955	414.885	343.662	214.577
tca_01260	tca_01260	hypothetical protein	236.344	97.0955	127.758	129.01	343.679	104.473	89.7184	114.195	141.321
tca_00525	tca_00525	hypothetical protein	236.165	80.3603	177.083	0	472.329	44.6011	116.119	156.581	197.586
tca_00340	tca_00340	hypothetical protein	236.05	183.571	87.0454	247.93	224.17	219.766	147.375	79.725	94.3659
tca_00354	tca_00354	hypothetical protein	235.694	11.546	49.4724	396.245	75.1433	0	23.0919	54.8033	44.1415
tca_00308	tca_00308	hypothetical protein	235.06	87.9877	121.02	175.602	294.518	112.155	63.8201	114.59	127.449
tca_00509	korB_1	2-oxoglutarate oxidoreductase subunit KorB	234.01	217.532	219.875	0	468.02	204.177	230.887	214.51	225.239
tca_01155	fbiC_2	FO synthase	233.486	96.8012	97.9071	246.552	220.42	82.9663	110.636	108.267	87.5474
tca_00701	tca_00701	hypothetical protein	233.06	51.4846	34.4675	370.711	95.4087	53.8975	49.0717	38.4538	30.4812
tca_00818	tca_00818	hypothetical protein	231.714	2556.04	415.762	388.42	75.0084	1361.5	3750.59	398.086	433.438
tca_00092	tca_00092	hypothetical protein	231.354	2177.18	413.367	73.9657	388.741	1524.96	2829.41	401.014	425.721
tca_00333	tca_00333	hypothetical protein	231.145	103.084	33.7403	212.108	250.183	17.1408	189.028	32.9464	34.5343
tca_01118	mtrC	Tetrahydromethanopterin S-methyltransferase subunit C	231.038	31.5249	8.62761	0	462.075	54.3646	8.68532	5.72571	11.5295
tca_00804	wecC	UDP-N-acetyl-D-mannosamine dehydrogenase	230.471	267.107	2721.9	295.349	165.594	153.454	380.76	2817.85	2625.94
tca_00582	proS	Proline--tRNA ligase	229.809	57.4196	57.1558	249.991	209.627	39.0818	75.7574	58.6136	55.6979
tca_00713	hemB	Delta-aminolevulinic acid dehydratase	229.695	146.17	176.832	326.319	133.071	54.1289	238.211	159.15	194.514
tca_01398	sipW	Signal peptidase I W	229.439	195.787	142.661	114.774	344.104	190.913	200.661	137.575	147.747
tca_00096	tca_00096	hypothetical protein	229.034	138.865	147.725	162.292	295.777	123.997	153.733	157.938	137.512
tca_01160	tca_01160	Ribonuclease	228.553	36.9947	23.4422	52.2521	404.854	29.7341	44.2553	24.5711	22.3133
tca_00055	tca_00055	hypothetical protein	228.518	141.498	78.5177	0	457.036	61.1229	221.872	80.1404	76.8949
tca_00817	pyrI	Aspartate carbamoyltransferase regulatory chain	227.577	2206.01	4770.16	0	455.154	241.441	4170.59	4940.18	4600.14
tca_01000	cooF_1	Iron-sulfur protein	226.997	29.5629	54.9832	174.722	279.273	45.8888	13.2369	48.3304	61.6359
tca_01006	pgk	Phosphoglycerate kinase	226.812	225.983	112.787	67.487	386.138	311.955	140.012	105.286	120.288
tca_00920	atpC	V-type ATP synthase subunit C	226.571	835.486	273.694	186.831	266.311	541.646	1129.33	276.288	271.101
tca_01521	moeB	Molybdopterin-synthase adenylyltransferase	225.597	356.807	291.262	110.068	341.127	349.788	363.826	284.977	297.547
tca_00066	moaA_1	Cyclic pyranopterin monophosphate synthase	225.499	23.585	21.8314	218.977	232.021	15.9755	31.1944	22.8828	20.7801
tca_00141	fprA_1	Nitric oxide reductase	225.437	1043.07	906.664	158.087	292.786	679.416	1406.72	947.727	865.601
tca_01178	tca_01178	hypothetical protein	225.239	83.0822	79.5047	161.007	289.47	0	166.164	75.3075	83.702
tca_01119	mtrD	Tetrahydromethanopterin S-methyltransferase subunit D	225.024	108.214	142.146	71.1209	378.928	96.5087	119.92	136.399	147.893
tca_00964	moeA_1	Molybdopterin molybdenumtransferase	224.054	156.528	112.285	230.578	217.53	188.801	124.256	119.308	105.263
tca_01495	hxlB_2	3-hexulose-6-phosphate isomerase	224.004	182.545	93.7172	227.587	220.42	127.018	238.072	88.1349	99.2996
tca_01778	minD_3	Septum site-determining protein MinD	223.493	168.458	175.477	170.69	276.296	134.49	202.427	178.237	172.718
tca_00934	tca_00934	hypothetical protein	223.035	61.8653	78.8105	234.398	211.671	71.8225	51.908	73.4827	84.1383
tca_01039	tca_01039	hypothetical protein	222.409	53.6012	84.5378	273.64	171.178	45.7345	61.468	97.0239	72.0516
tca_01527	tca_01527	hypothetical protein	222.204	115.15	180.13	218.977	225.43	43.134	187.166	182.726	177.534
tca_01179	guaB_6	Inosine-5'-monophosphate dehydrogenase	222.161	89.029	49.2625	203.203	241.119	88.0586	89.9993	47.2151	51.3098
tca_01362	cobD	Cobalamin biosynthesis protein CobD	222.095	58.2933	82.8249	260.617	183.572	48.8916	67.695	87.5381	78.1117
tca_00335	rfbX_2	Putative O-antigen transporter	222.074	27.6419	22.3427	252.156	191.993	15.6851	39.5988	23.4946	21.1907
tca_01580	leuA_3	2-isopropylmalate synthase	222.06	190.345	109.608	254.729	189.392	167.254	213.435	122.524	96.691
tca_01620	ugpC	sn-glycerol-3-phosphate import ATP-binding protein UgpC	221.425	124.47	109.004	232.907	209.942	80.6338	168.307	111.866	106.142
tca_00158	pdtaS_1	putative sensor histidine kinase pdtaS	221.421	433.671	352.814	155.272	287.571	356.828	510.514	348.677	356.951
tca_00227	nfo_1	endonuclease 4	221.305	211.659	215.397	156.581	286.029	161.559	261.758	226.461	204.333
tca_00744	tca_00744	hypothetical protein	220.774	16.1781	24.5124	315.993	125.556	18.4427	13.9136	28.1647	20.8601
tca_01421	fae	5,6,7,8-tetrahydromethanopterin hydro-lyase	220.652	168.311	156.137	136.3	305.004	100.234	236.389	149.302	162.973
tca_00305	fom3_1	2-hydroxyethylphosphonate methyltransferase	219.519	424.769	67.6416	214.739	224.299	39.1659	810.373	56.4297	78.8535
tca_00662	tca_00662	hypothetical protein	219.265	107.964	114.006	67.3777	371.153	109.125	106.802	103.749	124.263
tca_01603	trpE	Anthranilate synthase component 1	219.24	34.5753	48.4084	129.01	309.47	33.883	35.2677	44.1207	52.6961
tca_00271	tca_00271	hypothetical protein	218.528	72.8608	45.7188	228.424	208.633	98.5597	47.1619	51.4506	39.987
tca_00111	tca_00111	Deoxyhypusine synthase-like protein	218.389	137.292	155.518	231.886	204.892	138.201	136.383	161.344	149.693
tca_00379	tca_00379	hypothetical protein	217.973	858.368	490.201	0	435.946	483.803	1232.93	466.204	514.198
tca_01150	lrpC	HTH-type transcriptional regulator LrpC	217.82	452.986	355.513	0	435.641	239.755	666.217	360.314	350.711
tca_00607	tca_00607	hypothetical protein	217.675	24.194	25.7185	326.319	109.031	35.71	12.6779	9.02642	42.4105
tca_01487	tca_01487	hypothetical protein	217.56	247.827	165.242	110.58	324.539	312.208	183.447	160.076	170.407
tca_00170	tca_00170	hypothetical protein	217.067	108.11	242.641	238.599	195.534	0	216.22	254.924	230.359
tca_01104	tca_01104	hypothetical protein	216.915	84.8561	77.0946	203.575	230.256	90.2252	79.4871	79.5401	74.6491
tca_01841	mnmE	tRNA modification GTPase MnmE	216.762	56.2238	75.4441	267.992	165.533	0	112.448	91.1799	59.7083
tca_01003	tca_01003	hypothetical protein	216.722	163.629	174.934	255.474	177.971	95.8533	231.405	191.307	158.561
tca_01217	tca_01217	hypothetical protein	216.164	161.413	153.439	118.873	313.455	78.052	244.774	147.969	158.909
tca_00002	rplC	50S ribosomal protein L3	216.147	84.2529	109.538	328.25	104.045	79.7454	88.7604	114.86	104.216
tca_01173	coaBC	Coenzyme A biosynthesis bifunctional protein CoaBC	215.553	130.842	90.1357	126.718	304.388	94.2963	167.387	91.9137	88.3577
tca_01451	tca_01451	hypothetical protein	215.514	111.699	110.146	96.477	334.551	126.693	96.705	136.103	84.1888
tca_00104	nfrA2	FMN reductase [NAD(P)H]	214.666	41.4189	112.748	130.528	298.805	12.8556	69.9821	116.441	109.056
tca_01062	tca_01062	Ferredoxin-3	214.434	25.0264	53.379	326.319	102.548	25.7112	24.3416	70.4061	36.3518
tca_01210	tca_01210	hypothetical protein	214.311	45.2861	42.1406	287.317	141.305	17.414	73.1582	36.6811	47.6002
tca_00046	galK	Galactokinase	214.155	141.716	112.264	127.737	300.573	122.213	161.218	114.077	110.451
tca_01457	nadE	NH(3)-dependent NAD(+) synthetase	214.049	69.5333	70.2991	103.884	324.214	43.6545	95.412	58.0463	82.5518
tca_01458	arsA	Arsenical pump-driving ATPase	213.736	36.6527	39.23	307.242	120.229	29.1394	44.166	42.9658	35.4943
tca_00859	tca_00859	Putative two-component membrane permease complex subunit SMU_747c	212.692	122.496	345.52	343.494	81.8899	49.6182	195.373	345.379	345.661
tca_01399	ilvD	Dihydroxy-acid dehydratase	212.396	143.129	164.998	161.38	263.411	99.3389	186.919	173.816	156.181
tca_00750	hypA	hydrogenase nickel incorporation protein HypA	212.247	26.7946	76.1354	376.097	48.3974	18.5208	35.0684	70.2225	82.0484
tca_00470	tca_00470	hypothetical protein	211.665	82.7785	11.6314	278.921	144.409	20.3487	145.208	6.0008	17.262
tca_00732	fusA_1	Elongation factor G	211.549	101.79	309.627	108.773	314.325	66.6588	136.922	306.898	312.357
tca_00142	ftnA	Bacterial non-heme ferritin	211.22	556.221	346.819	193.515	228.925	512.481	599.96	321.173	372.466
tca_01334	glyA	Serine hydroxymethyltransferase	211.19	452.121	358.951	52.3342	370.045	300.672	603.571	362.27	355.631
tca_00417	tca_00417	hypothetical protein	211.029	42.6954	74.4387	90.4472	331.611	59.3874	26.0035	85.0642	63.8133
tca_00651	tca_00651	hypothetical protein	210.54	99.1074	99.0101	90.9415	330.138	179.136	19.0792	116.974	81.0467
tca_00555	metG	Methionine--tRNA ligase	209.974	175.527	218.672	204.2	215.749	0	351.054	208.286	229.058
tca_00871	tca_00871	hypothetical protein	209.852	199.969	44.1502	195.332	224.372	179.556	220.382	81.0471	7.2533
tca_01710	pdtaR_5	putative transcriptional regulatory protein pdtaR	209.404	120.382	151.576	150.95	267.858	112.329	128.435	154.145	149.007
tca_00407	uvrC	UvrABC system protein C	209	173.224	113.993	199.246	218.754	183.154	163.294	115.449	112.537
tca_00155	glmS_1	Glutamine--fructose-6-phosphate aminotransferase [isomerizing]	208.734	172.038	120.378	140.798	276.67	203.384	140.693	128.523	112.234
tca_01342	sufS	Cysteine desulfurase SufS	208.378	208.275	209.058	209.074	207.682	199.51	217.041	220.92	197.195
tca_01327	tca_01327	hypothetical protein	207.991	89.9354	94.6876	241.193	174.79	87.1015	92.7693	97.5736	91.8016
tca_00216	tca_00216	hypothetical protein	207.688	205.762	120.83	92.9737	322.402	248.255	163.269	127.731	113.93
tca_00235	tca_00235	Putative ribosomal protein L7Ae-like protein	207.59	344.129	539.564	223.687	191.494	240.87	447.387	525.934	553.193
tca_01029	tca_01029	Universal stress protein/MSMEI_3859	206.686	117.794	278.058	83.42	329.952	115.024	120.564	271.132	284.984
tca_00722	copB	Copper-exporting P-type ATPase B	206.506	87.0999	60.4593	303.631	109.38	65.7361	108.464	64.2398	56.6788
tca_00844	pyrH	Uridylate kinase	206.218	197.337	117.82	147.931	264.504	320.533	74.1405	116.621	119.019
tca_00858	xerC	Tyrosine recombinase XerC	205.993	35.9003	59.7559	142.242	269.745	30.3535	41.447	71.3145	48.1973
tca_00408	uvrB	UvrABC system protein B	205.664	124.323	78.7244	163.413	247.915	94.8725	153.774	82.0774	75.3714
tca_01021	fusA_2	Elongation factor G	205.612	63.1924	49.2824	68.2994	342.925	36.8727	89.512	61.0858	37.479
tca_01667	cpdA_4	3',5'-cyclic adenosine monophosphate phosphodiesterase CpdA	205.465	23.2162	35.9179	210.929	200.001	19.3893	27.043	32.6736	39.1623
tca_01271	tca_01271	hypothetical protein	205.257	52.5531	175.372	64.505	346.009	25.4123	79.694	199.841	150.902
tca_00730	tca_00730	hypothetical protein	205.038	90.0728	87.7096	175.745	234.331	89.3046	90.841	83.4882	91.9311
tca_01712	tca_01712	hypothetical protein	204.547	100.923	141.352	160.795	248.3	95.0198	106.825	133.434	149.271
tca_00075	tca_00075	hypothetical protein	204.4	20.5262	104.3	132.082	276.718	0	41.0523	97.428	111.171
tca_01526	tca_01526	hypothetical protein	203.331	137.242	107.937	238.599	168.062	140.997	133.486	94.0495	121.824
tca_00262	tca_00262	hypothetical protein	203.288	29.2238	21.6147	328.466	78.1095	43.134	15.3136	20.1907	23.0388
tca_00048	fni	Isopentenyl-diphosphate delta-isomerase	202.959	85.7421	47.6104	301.146	104.771	33.3022	138.182	39.8968	55.324
tca_00190	yjjG	Pyrimidine 5'-nucleotidase YjjG	202.891	281.494	288.36	24.438	381.344	198.969	364.018	295.406	281.313
tca_01077	tca_01077	Amino acid--[acyl-carrier-protein] ligase 1	202.742	88.9862	63.8516	269.817	135.667	68.0297	109.943	64.783	62.9203
tca_01108	tca_01108	hypothetical protein	202.634	286.892	643.533	0	405.267	270.112	303.672	567.244	719.821
tca_01543	tca_01543	hypothetical protein	201.93	117.966	113.875	50.8938	352.967	93.5669	142.365	135.148	92.6027
tca_00849	epsJ	putative glycosyltransferase EpsJ	201.885	188.137	285.149	66.2662	337.504	220.037	156.237	291.187	279.111
tca_00801	tca_00801	hypothetical protein	201.843	126.476	750.565	307.292	96.3937	110.441	142.51	790.062	711.069
tca_01380	ilvE	Branched-chain-amino-acid aminotransferase	201.164	55.8963	81.5608	234.907	167.42	42.7125	69.0802	87.9708	75.1508
tca_01233	bioB	Biotin synthase	201.101	52.5393	80.2635	215.918	186.283	39.2597	65.8189	87.7508	72.7763
tca_00352	tca_00352	hypothetical protein	200.49	4.61838	40.367	339.639	61.3415	0	9.23677	28.1845	52.5494
tca_01563	tca_01563	hypothetical protein	200.408	39.4241	62.4984	82.3876	318.429	18.0318	60.8164	63.8105	61.1863
tca_00152	purQ_1	Phosphoribosylformylglycinamidine synthase subunit PurQ	200.382	510.306	226.734	0	400.764	522.247	498.364	227.721	225.747
tca_00108	carH	HTH-type transcriptional repressor CarH	200.374	461.548	263.671	132.476	268.273	478.408	444.688	284.453	242.888
tca_01639	recA_2	Protein RecA	200.18	38.2078	87.0683	259.667	140.694	43.3991	33.0165	108.394	65.7427
tca_01671	mmgD_2	2-methylcitrate synthase	200.13	158.582	85.952	284.971	115.288	162.163	155.001	85.1327	86.7714
tca_01100	tca_01100	[FeFe] hydrogenase maturase subunit HydE	199.064	50.1852	63.7202	129.01	269.118	63.5307	36.8397	59.7738	67.6666
tca_00148	tca_00148	hypothetical protein	198.698	234.808	197.483	201.509	195.886	175.895	293.721	188.533	206.434
tca_01052	pdtaS_12	putative sensor histidine kinase pdtaS	198.575	246.415	294.475	82.3061	314.844	487.458	5.37213	313.273	275.677
tca_00583	tca_00583	hypothetical protein	198.523	121.22	77.9407	213.363	183.684	121.414	121.025	87.2168	68.6646
tca_00944	tca_00944	hypothetical protein	198.417	999.974	425.798	176.67	220.165	1030.09	969.861	423.207	428.388
tca_00753	fixL	Sensor protein FixL	198.344	87.085	151.294	187.594	209.094	73.9043	100.266	136.399	166.188
tca_00649	tca_00649	hypothetical protein	198.245	64.2082	125.033	161.576	234.914	81.3357	47.0806	99.0715	150.995
tca_00682	gatB_1	Aspartyl/glutamyl-tRNA(Asn/Gln) amidotransferase subunit B	197.388	95.1758	65.781	241.582	153.195	106.923	83.4289	62.1221	69.4398
tca_01704	glmM_3	Phosphoglucosamine mutase	197.381	99.6786	222.273	0	394.762	114.141	85.2166	219.567	224.979
tca_01851	tca_01851	hypothetical protein	196.927	62.4158	173.09	0	393.854	46.0536	78.778	188.725	157.455
tca_00711	pheS_1	Phenylalanine--tRNA ligase alpha subunit	196.88	59.7749	93.9971	65.0089	328.752	56.9129	62.6368	87.8137	100.181
tca_01533	glmM_1	Phosphoglucosamine mutase	196.497	148.132	116.807	218.977	174.016	158.158	138.106	106.674	126.939
tca_00059	pgaC	Poly-beta-1,6-N-acetyl-D-glucosamine synthase	196.454	121.532	140.004	198.912	193.995	76.9118	166.151	143.362	136.645
tca_01572	pglB_2	Undecaprenyl-diphosphooligosaccharide--protein glycotransferase	196.396	222.565	103.612	65.5724	327.22	204.079	241.051	105.202	102.023
tca_00058	tca_00058	Undecaprenyl-phosphate mannosyltransferase	196.183	19.5023	21.3234	202.338	190.028	28.7851	10.2194	12.5931	30.0538
tca_01559	tca_01559	hypothetical protein	196.068	130.044	59.3204	72.0445	320.091	132.452	127.635	59.7854	58.8554
tca_00694	vspIM	Modification methylase VspI	195.297	50.8309	82.7923	213.996	176.598	47.5569	54.105	76.9522	88.6323
tca_01462	ychF	Ribosome-binding ATPase YchF	195.102	199.923	139.887	195.627	194.578	117.438	282.408	137.602	142.172
tca_01017	tca_01017	hypothetical protein	194.31	67.2698	63.6976	0	388.62	0	134.54	83.6995	43.6957
tca_01167	mrr	Mrr restriction system protein	194.028	67.7666	66.2381	310.918	77.1382	45.1274	90.4059	65.6346	66.8416
tca_01441	tca_01441	hypothetical protein	194.006	936.051	470.755	0	388.013	966.898	905.203	477.087	464.422
tca_00775	cbiD	Cobalt-precorrin-5B C(1)-methyltransferase	193.751	56.8631	92.2841	151.984	235.518	0	113.726	100.478	84.0906
tca_01523	tca_01523	hypothetical protein	193.675	83.788	117.663	182.215	205.136	101.031	66.5452	136.088	99.2379
tca_01622	tca_01622	hypothetical protein	193.403	147.319	66.236	237.323	149.483	148.034	146.603	79.5966	52.8754
tca_00410	cph1	Phytochrome-like protein cph1	192.758	60.2464	62.1846	129.764	255.751	42.6015	77.8914	67.7509	56.6182
tca_01018	tca_01018	hypothetical protein	192.143	15.9998	13.3784	346.714	37.5716	5.05892	26.9406	9.59057	17.1661
tca_00208	hemL	Glutamate-1-semialdehyde 2,1-aminomutase	190.857	188.461	321.318	105.414	276.299	254.364	122.557	295.235	347.4
tca_00248	tca_00248	hypothetical protein	190.748	223.65	160.035	0	381.497	196.131	251.169	118.038	202.032
tca_00717	aroC	Chorismate synthase	189.934	137.138	97.0846	192.311	187.558	114.615	159.661	82.6579	111.511
tca_01301	tca_01301	hypothetical protein	189.876	113.013	180.658	85.3451	294.408	93.3955	132.631	175.745	185.57
tca_00646	cobN_5	Aerobic cobaltochelatase subunit CobN	189.099	223.463	4474.76	48.7472	329.451	193.751	253.175	4613.27	4336.25
tca_00323	tca_00323	hypothetical protein	188.523	246.078	230.345	149.258	227.789	323.408	168.747	240.839	219.85
tca_01417	tca_01417	Ferredoxin-2	188.361	25.6065	32.118	330.204	46.5173	17.3449	33.8682	20.0945	44.1415
tca_01496	fdhD	Sulfurtransferase FdhD	188.152	209.035	117.696	133.673	242.631	263.308	154.762	117.09	118.302
tca_00504	murD_2	UDP-N-acetylmuramoylalanine--D-glutamate ligase	187.811	144.887	85.1651	273.947	101.675	115.119	174.655	83.3551	86.9752
tca_01683	hyfA	Hydrogenase-4 component A	187.66	38.9114	80.212	167.091	208.228	13.1654	64.6574	85.9685	74.4556
tca_01066	tca_01066	hypothetical protein	186.802	1467.96	818.482	49.0923	324.513	1643.93	1292	809.342	827.621
tca_00191	tca_00191	hypothetical protein	186.587	273.007	198.771	159.715	213.459	244.693	301.321	204.992	192.551
tca_00822	tca_00822	Magnesium transporter MgtE	185.95	1614.9	1363.27	193.891	178.009	1174.06	2055.73	1390.58	1335.96
tca_01060	tca_01060	hypothetical protein	185.664	154.597	184.347	113.988	257.34	237.007	72.186	167.638	201.056
tca_00771	tca_00771	hypothetical protein	185.069	148.408	155.464	112.069	258.068	95.6596	201.156	173.599	137.329
tca_01274	pyrE_2	Orotate phosphoribosyltransferase	184.372	1062.14	925.39	0	368.744	953.79	1170.5	1048.04	802.739
tca_01729	tca_01729	hypothetical protein	184.335	17.2235	27.4709	239.113	129.557	18.8401	15.607	15.874	39.0678
tca_00173	purF_1	Amidophosphoribosyltransferase	183.339	37.5479	50.6406	290.062	76.6167	21.426	53.6699	54.1585	47.1228
tca_01338	tca_01338	hypothetical protein	182.099	266.323	154.125	181.883	182.315	257.22	275.426	146.676	161.574
tca_00557	tca_00557	hypothetical protein	182.028	60.0553	41.3623	214.739	149.317	51.6989	68.4117	49.4997	33.2248
tca_00067	tca_00067	hypothetical protein	181.885	69.3221	135.957	86.6786	277.091	73.9868	64.6574	127.075	144.839
tca_01731	rmlC	dTDP-4-dehydrorhamnose 3,5-epimerase	181.884	85.2373	57.1497	268.424	95.3431	93.9981	76.4765	47.8497	66.4496
tca_00150	tca_00150	hypothetical protein	181.573	536.163	416.663	0	363.146	408.927	663.399	397.599	435.727
tca_01552	ilvG	Acetolactate synthase isozyme 2 large subunit	180.766	292.324	221.284	126.798	234.733	323.309	261.339	233.827	208.74
tca_01785	tca_01785	hypothetical protein	180.42	57.2086	25.101	212.197	148.644	49.7599	64.6574	45.6993	4.5026
tca_01261	tca_01261	hypothetical protein	180.344	107.62	160.734	0	360.688	169.98	45.2602	184.139	137.329
tca_00319	tca_00319	hypothetical protein	179.838	95.8373	299.526	168.957	190.719	0	191.675	284.309	314.742
tca_01425	tca_01425	hypothetical protein	179.409	47.1033	90.6671	100.406	258.411	0	94.2067	96.5132	84.821
tca_01056	vte5	Phytol kinase	179.354	248.77	373.431	0	358.709	335.763	161.777	368.783	378.079
tca_00009	rpmC	50S ribosomal protein L29	179.087	261.284	140.608	85.3451	272.828	224.149	298.419	122.759	158.457
tca_01593	ubiB	putative protein kinase UbiB	178.789	259.977	352.773	109.162	248.416	274.974	244.981	371.682	333.865
tca_01673	pstS1_2	Phosphate-binding protein PstS 1	178.659	305.717	146.063	180.894	176.423	0	611.434	147.333	144.793
tca_00752	lon2	Lon protease 2	178.251	96.6693	215.472	94.6073	261.895	79.0604	114.278	205.788	225.156
tca_00622	nrdZ	Vitamin B12-dependent ribonucleoside-diphosphate reductase	177.814	86.1464	70.2427	189.117	166.511	104.513	67.78	69.9676	70.5178
tca_00656	rph_1	Ribonuclease PH	177.263	41.5772	44.4324	186.294	168.231	27.1823	55.9721	43.5154	45.3494
tca_01455	valS_2	Valine--tRNA ligase	177.181	152.16	108.016	153.767	200.596	130.475	173.844	106.007	110.024
tca_00369	tca_00369	hypothetical protein	177.174	145.064	119.176	130.913	223.435	113.893	176.234	111.352	126.999
tca_01187	tca_01187	hypothetical protein	177.063	57.362	34.9243	272.824	81.3026	77.6255	37.0985	32.7023	37.1464
tca_01709	ydcP_2	putative protease YdcP	176.907	94.7945	73.0437	137.313	216.502	119.01	70.579	83.3715	62.7159
tca_00444	tupB	Tungstate uptake system permease protein TupB	176.906	97.4857	78.7978	242.246	111.566	101.797	93.1744	73.0391	84.5564
tca_01529	ligB	DNA ligase B	176.568	182.717	70.8511	248.987	104.148	142.558	222.876	59.2308	82.4715
tca_00828	thiDN	Bifunctional thiamine biosynthesis protein ThiDN	176.369	6485.92	2485.7	149.124	203.614	12521.3	450.516	2254.71	2716.68
tca_01577	tca_01577	hypothetical protein	175.668	324.899	429.677	182.882	168.453	136.091	513.706	455.289	404.065
tca_00285	tca_00285	hypothetical protein	175.66	334.863	329.265	0	351.319	250.712	419.013	330.812	327.717
tca_00688	tca_00688	hypothetical protein	175.334	334.012	267.818	0	350.669	485.657	182.367	263.618	272.017
tca_01105	tca_01105	hypothetical protein	174.767	22.3573	33.7918	210.662	138.872	4.61066	40.1039	31.0783	36.5052
tca_00518	yhdG	putative amino acid permease YhdG	174.438	35.4425	71.0554	208.844	140.032	18.8549	52.0302	74.7387	67.3721
tca_00529	tca_00529	hypothetical protein	172.649	557.174	563.436	308.191	37.1078	404.714	709.635	567.383	559.489
tca_01431	afsK	Serine/threonine-protein kinase AfsK	171.869	102.391	92.9776	151.044	192.694	84.7495	120.032	97.2351	88.7201
tca_00418	ykoC	Putative HMP/thiamine permease protein YkoC	171.84	37.5769	36.076	112.753	230.928	32.5745	42.5793	41.1693	30.9828
tca_00475	tca_00475	hypothetical protein	170.675	118.893	128.313	286.936	54.4141	131.881	105.904	126.992	129.634
tca_01234	gatB_2	Aspartyl/glutamyl-tRNA(Asn/Gln) amidotransferase subunit B	169.968	112.035	131.485	160.259	179.676	45.328	178.742	119.69	143.28
tca_01693	tca_01693	hypothetical protein	169.966	12.8065	41.2938	241.193	98.739	0	25.6131	37.8063	44.7813
tca_00043	eno2	Enolase 2	169.723	38.4951	28.6771	172.941	166.505	55.9029	21.0873	28.7027	28.6514
tca_00229	hxlB_1	3-hexulose-6-phosphate isomerase	169.703	67.7417	48.1737	199.138	140.267	78.4522	57.0311	45.6413	50.7062
tca_00383	hom_1	Homoserine dehydrogenase	169.695	146.054	110.614	131.3	208.089	161.646	130.463	112.136	109.091
tca_01800	purL_2	Phosphoribosylformylglycinamidine synthase subunit PurL	169.689	24.7232	137.656	202.338	137.039	13.2854	36.161	141.322	133.99
tca_01494	tca_01494	hypothetical protein	169.659	164.45	92.3852	116.788	222.53	112.468	216.432	91.5311	93.2393
tca_00877	rnj_1	Ribonuclease J	169.364	105.823	63.293	11.2753	327.454	108.088	103.557	55.828	70.758
tca_00705	ddlB	D-alanine--D-alanine ligase B	169.131	52.2314	44.3971	166.272	171.99	51.6093	52.8534	45.5748	43.2194
tca_01102	tca_01102	hypothetical protein	168.488	113.897	161.42	64.2559	272.721	205.326	22.4678	155.819	167.022
tca_00194	feoB_1	Ferrous iron transport protein B	168.205	100.736	90.02	209.008	127.401	110.931	90.5406	83.3491	96.691
tca_00739	ndhI_3	NAD(P)H-quinone oxidoreductase subunit I, chloroplastic	168.168	13.7569	22.7335	88.5228	247.813	0	27.5138	20.8136	24.6535
tca_00794	pcm	Protein-L-isoaspartate O-methyltransferase	167.381	149.03	75.6425	0	334.762	138.101	159.958	77.0882	74.1968
tca_00414	tca_00414	hypothetical protein	166.99	48.3039	46.3943	15.2402	318.74	44.0293	52.5785	44.6857	48.1029
tca_01272	tca_01272	hypothetical protein	166.689	60.8352	57.667	175.182	158.196	65.1802	56.4901	58.9568	56.3772
tca_00240	tca_00240	hypothetical protein	166.542	82.9182	63.441	262.083	71.0015	80.3054	85.531	65.2461	61.6359
tca_00217	cobN_1	Aerobic cobaltochelatase subunit CobN	165.801	72.4437	95.0386	160.795	170.806	57.7898	87.0976	93.2868	96.7904
tca_01730	rffG	dTDP-glucose 4,6-dehydratase 2	165.457	75.5558	95.1768	181.073	149.841	77.8204	73.2912	97.4425	92.9111
tca_00806	tca_00806	hypothetical protein	165.267	76.1924	922.322	210.036	120.497	43.8064	108.578	943.592	901.051
tca_01758	metX	Homoserine O-acetyltransferase	165.238	59.4624	46.4881	104.34	226.137	66.2259	52.6988	49.0652	43.9109
tca_00395	tca_00395	hypothetical protein	164.759	116.129	140.889	0	329.517	140.301	91.9572	130.716	151.062
tca_01185	queD	6-carboxy-5,6,7,8-tetrahydropterin synthase	164.722	219.419	247.288	104.014	225.43	186.674	252.164	255.109	239.468
tca_00759	mvaS	Hydroxymethylglutaryl-CoA synthase	164.389	55.1298	115.153	159.868	168.91	29.3913	80.8683	112.765	117.541
tca_00193	exoA	Exodeoxyribonuclease	164.328	132.315	101.89	193.515	135.141	115.767	148.862	90.4041	113.376
tca_00133	moaE	Molybdopterin synthase catalytic subunit	164.147	114.259	79.6792	192.619	135.675	131.532	96.9861	73.5277	85.8307
tca_00015	tca_00015	hypothetical protein	164.121	175.755	136.142	68.4868	259.755	101.928	249.583	130.716	141.568
tca_01652	nikQ	Nickel transport protein NikQ	164.114	50.1716	66.7067	190.561	137.667	58.39	41.9533	65.0109	68.4025
tca_00768	dapA	4-hydroxy-tetrahydrodipicolinate synthase	163.452	57.539	46.2868	205.46	121.444	51.509	63.5689	53.733	38.8406
tca_01775	tca_01775	hypothetical protein	162.869	17.9299	34.0634	221.265	104.473	20.7546	15.1051	35.8485	32.2782
tca_01181	hrp1_1	Hypoxic response protein 1	162.781	26.0347	27.0483	159.003	166.56	16.2401	35.8293	27.8554	26.2412
tca_00693	leuA_1	2-isopropylmalate synthase	162.525	294.4	181.796	133.942	191.109	340.057	248.742	167.96	195.632
tca_00815	tca_00815	hypothetical protein	162.194	733.58	1582.43	178.949	145.439	96.6091	1370.55	1596.64	1568.21
tca_01680	yccM	Putative electron transport protein YccM	161.647	18.1929	29.4359	203.95	119.345	10.713	25.6728	29.3359	29.5359
tca_00949	tca_00949	hypothetical protein	161.35	47.6598	120.129	142.975	179.724	0	95.3197	113.9	126.357
tca_01478	tca_01478	hypothetical protein	160.953	40.0683	69.0556	126.078	195.828	33.113	47.0236	56.9622	81.1491
tca_01287	tca_01287	hypothetical protein	160.741	41.1373	258.84	0	321.483	31.6733	50.6014	261.531	256.149
tca_00785	deoC	Deoxyribose-phosphate aldolase	160.513	82.1332	80.5535	224.896	96.1293	98.4439	65.8224	85.0191	76.0878
tca_01786	tca_01786	putative tRNA/rRNA methyltransferase	160.264	242.221	126.971	0	320.528	166.252	318.189	144.535	109.407
tca_01409	cbiA	Cobyrinate a,c-diamide synthase	160.239	41.2768	55.4312	235.27	85.2071	0	82.5536	60.2836	50.5788
tca_00200	fprA_2	Nitric oxide reductase	160.159	88.2544	146.823	81.7803	238.538	60.8562	115.653	153.449	140.197
tca_01840	rnj_2	Ribonuclease J	160.045	106.979	99.8818	0	320.091	75.6868	138.272	96.3209	103.443
tca_01536	hisC	Histidinol-phosphate aminotransferase	159.863	113.378	70.0651	211.619	108.108	127.038	99.7168	69.4075	70.7227
tca_00647	tca_00647	hypothetical protein	159.371	236.35	236.611	5.93943	312.802	199.67	273.029	237.895	235.327
tca_01373	tca_01373	hypothetical protein	159.267	95.1988	86.4255	36.3369	282.198	111.341	79.0571	78.3998	94.4513
tca_01016	rpoC_4	DNA-directed RNA polymerase subunit beta'	158.844	160.767	110.093	73.6384	244.049	119.265	202.269	107.618	112.567
tca_00027	cmk_1	Cytidylate kinase	158.225	36.234	46.1197	119.3	197.15	50.9156	21.5525	34.6498	57.5897
tca_00238	ndk	Nucleoside diphosphate kinase	158.196	360.553	503.017	0	316.393	345.072	376.034	528.996	477.038
tca_00980	fbiB_1	Coenzyme F420:L-glutamate ligase	158.044	385.143	156.109	64.2559	251.832	385.338	384.949	168.261	143.957
tca_00089	gltA_1	Glutamate synthase [NADPH] large chain	157.937	78.6672	103.604	89.4747	226.399	82.2483	75.086	102.217	104.99
tca_01855	accC	Biotin carboxylase	157.848	131.878	89.4123	191.679	124.017	66.6297	197.126	85.4574	93.3671
tca_00918	atpA	V-type ATP synthase alpha chain	157.629	153.657	92.6394	199.138	116.119	128.263	179.051	94.4302	90.8485
tca_00025	rplO_1	50S ribosomal protein L15	157.443	71.2551	46.9742	0	314.886	0	142.51	93.9484	0
tca_00440	ilvB_1	Acetolactate synthase isozyme 1 large subunit	157.045	53.4502	149.427	249.068	65.0219	11.8936	95.0068	160.965	137.89
tca_00872	tca_00872	hypothetical protein	156.828	71.7152	46.8327	165.82	147.836	69.2853	74.1452	55.0415	38.6238
tca_00278	tca_00278	hypothetical protein	156.721	84.1038	44.0793	248.392	65.0494	114.166	54.042	34.3543	53.8043
tca_00072	yrrB_1	TPR repeat-containing protein YrrB	156.37	64.8162	81.338	163.561	149.179	0	129.632	80.6833	81.9926
tca_00443	cysA	Sulfate/thiosulfate import ATP-binding protein CysA	156.143	284.185	279.238	159.409	152.878	322.376	245.995	284.41	274.066
tca_00364	tca_00364	hypothetical protein	155.604	37.4944	35.4301	229.233	81.9745	30.1027	44.8861	31.7044	39.1558
tca_00748	tca_00748	hypothetical protein	154.553	44.3054	58.6846	97.0396	212.066	40.3534	48.2574	50.1058	67.2633
tca_00198	groL_1	60 kDa chaperonin	154.118	123.537	150.311	153.244	154.992	155.625	91.4491	142.428	158.194
tca_01637	pgsA	CDP-diacylglycerol--inositol 3-phosphatidyltransferase	153.83	99.5297	231.355	29.3515	278.308	84.7972	114.262	233.827	228.882
tca_00292	cobN_2	Aerobic cobaltochelatase subunit CobN	153.821	308.603	337.769	89.6061	218.037	487.796	129.41	348.246	327.291
tca_00361	nqo8	NADH-quinone oxidoreductase subunit 8	153.506	75.7592	33.0605	175.182	131.83	56.2339	95.2846	28.5362	37.5848
tca_00429	tca_00429	hypothetical protein	153.023	76.7199	111.048	95.6453	210.401	67.8245	85.6153	112.706	109.39
tca_00122	bshA_1	N-acetyl-alpha-D-glucosaminyl L-malate synthase	152.679	51.4242	44.9817	161.433	143.925	59.7435	43.1049	33.2879	56.6755
tca_00615	ydcP_1	putative protease YdcP	151.939	94.2428	58.9381	194.647	109.231	96.7662	91.7195	70.3789	47.4973
tca_01048	yadH	Inner membrane transport permease YadH	151.9	97.3842	86.2114	130.528	173.272	108.559	86.2098	95.68	76.7428
tca_00962	tca_00962	Calcium-transporting ATPase 1	151.894	105.34	81.2471	144.43	159.357	120.696	89.9847	87.1664	75.3279
tca_00998	tca_00998	hypothetical protein	151.504	30.5689	61.3934	98.4751	204.532	12.9317	48.2061	47.2151	75.5717
tca_00987	psd	Phosphatidylserine decarboxylase proenzyme	151.341	44.3343	52.4161	188.849	113.834	49.599	39.0696	52.238	52.5942
tca_00865	acr3	Arsenical-resistance protein Acr3	150.25	34.3217	79.6503	30.9912	269.508	38.6626	29.9808	75.8673	83.4332
tca_01585	tca_01585	hypothetical protein	149.759	49.8233	67.3157	135.303	164.216	39.0894	60.5572	76.3503	58.2812
tca_00917	atpB	V-type ATP synthase beta chain	149.434	239.471	140.001	35.867	263.002	211.951	266.99	149.481	130.522
tca_00852	tca_00852	hypothetical protein	149.312	15.7475	56.5978	95.3713	203.253	0	31.495	62.4349	50.7606
tca_01295	alkA	DNA-3-methyladenine glycosylase	149.116	127.519	98.6099	177.234	120.998	118.699	136.338	104.424	92.7959
tca_00005	rplB	50S ribosomal protein L2	148.315	50.1231	94.3387	91.693	204.936	36.1232	64.123	105.258	83.419
tca_00669	tca_00669	hypothetical protein	148.027	21.7796	42.1662	0	296.053	32.864	10.6952	11.5375	72.7948
tca_00497	tca_00497	hypothetical protein	147.954	224.682	243.101	71.1209	224.788	236.602	212.761	251.158	235.044
tca_01193	tca_01193	hypothetical protein	147.368	90.4444	136.543	198.122	96.6128	130.087	50.8022	140.662	132.425
tca_01750	mntP	putative manganese efflux pump MntP	147.337	116.163	129.836	89.9583	204.715	114.195	118.131	129.395	130.277
tca_00863	tca_00863	Putative universal stress protein	147.017	46.1223	125.693	221.897	72.1376	0	92.2445	140.15	111.237
tca_01336	tca_01336	hypothetical protein	146.692	211.115	83.3236	73.9657	219.418	228.259	193.972	80.8165	85.8307
tca_01716	tca_01716	hypothetical protein	146.684	36.2835	32.3603	183.248	110.12	30.627	41.9399	34.0998	30.6207
tca_00461	tca_00461	hypothetical protein	146.547	43.923	36.0862	179.528	113.566	35.9527	51.8933	35.5068	36.6656
tca_00451	tca_00451	hypothetical protein	146.354	273.416	208.298	94.0242	198.684	294.046	252.785	210.86	205.735
tca_00613	nifH1_1	Nitrogenase iron protein 1	146.183	91.5422	132.316	125.13	167.236	115.024	68.0604	145.373	119.26
tca_00943	tca_00943	hypothetical protein	145.59	242.601	151.099	0	291.18	182.121	303.081	170.233	131.965
tca_00286	tca_00286	hypothetical protein	145.561	282.538	251.667	85.3451	205.777	212.942	352.134	256.142	247.193
tca_00498	tca_00498	hypothetical protein	145.359	958.453	865.821	0	290.718	513.522	1403.38	850.259	881.383
tca_00686	guaA_2	GMP synthase [glutamine-hydrolyzing]	145.191	75.628	106.094	17.8374	272.545	39.8207	111.435	111.51	100.679
tca_00914	tca_00914	hypothetical protein	144.957	81.0594	52.9602	0	289.915	87.8315	74.2872	53.3263	52.5942
tca_00016	rplE	50S ribosomal protein L5	144.951	114.65	88.5834	0	289.902	86.2112	143.088	116.222	60.9449
tca_00466	tca_00466	DUF5591 domain-containing protein	144.774	2.28587	12.8508	168.104	121.444	0	4.57173	6.97496	18.7267
tca_01584	recD	RecBCD enzyme subunit RecD	144.747	33.6865	42.7299	138.039	151.455	33.9884	33.3845	34.8423	50.6174
tca_00132	tca_00132	Deoxyguanosinetriphosphate triphosphohydrolase-like protein	144.683	106.915	146.26	54.5202	234.846	0	213.83	133.09	159.43
tca_00816	tca_00816	hypothetical protein	144.576	979.379	1627.8	109.85	179.302	155.074	1803.69	1722.88	1532.72
tca_01194	ndhA	NAD(P)H-quinone oxidoreductase subunit 1, chloroplastic	144.414	25.8371	26.7719	151.294	137.535	30.9054	20.7687	20.4599	33.0839
tca_00107	tca_00107	Blue-light-activated histidine kinase 2	143.972	91.7951	323.315	0	287.944	112.232	71.3586	325.811	320.819
tca_01522	tca_01522	hypothetical protein	143.791	81.3971	61.7228	100.862	186.72	81.6786	81.1156	67.8896	55.5559
tca_00795	tca_00795	hypothetical protein	143.624	59.8377	56.3918	0	287.247	50.2403	69.435	52.9135	59.8701
tca_00427	tca_00427	hypothetical protein	143.466	75.3402	128.284	241.193	45.7394	31.6733	119.007	135.658	120.909
tca_01325	tca_01325	hypothetical protein	143.365	122.036	123.521	76.4109	210.318	92.3149	151.758	138.654	108.388
tca_01396	argF	Ornithine carbamoyltransferase	143.276	61.9601	70.0868	36.7379	249.814	43.4196	80.5006	74.6921	65.4815
tca_01343	ribH_2	6,7-dimethyl-8-ribityllumazine synthase	143.168	260.094	214.503	118.873	167.462	182.121	338.066	255.383	173.623
tca_00313	fcf2	dTDP-fucopyranose mutase	143.159	141.173	98.0772	189.282	97.0354	198.852	83.4946	95.0498	101.105
tca_01491	lysS	Lysine--tRNA ligase	142.541	115.949	151.462	20.3575	264.725	133.667	98.2318	155.138	147.786
tca_01818	cpdA_5	3',5'-cyclic adenosine monophosphate phosphodiesterase CpdA	142.528	32.5379	29.5161	122.19	162.866	41.7194	23.3564	26.3635	32.6686
tca_00556	tca_00556	hypothetical protein	142.497	283.827	183.594	63.2787	221.716	264.526	303.128	194.875	172.314
tca_00117	ecfA3_1	Energy-coupling factor transporter ATP-binding protein EcfA3	142.018	96.175	133.715	159.066	124.969	0	192.35	139.699	127.731
tca_00960	mshD	Mycothiol acetyltransferase	141.94	87.8853	83.5248	176.67	107.211	83.5206	92.25	83.0775	83.972
tca_01249	tca_01249	hypothetical protein	141.88	163.627	44.4696	200.994	82.7665	68.6254	258.63	36.6944	52.2448
tca_00331	tagF_2	CDP-glycerol:poly(glycerophosphate) glycerophosphotransferase	141.764	16.1702	11.7883	164.924	118.605	7.87551	24.465	12.4418	11.1348
tca_00213	dtd3	D-aminoacyl-tRNA deacylase	141.197	47.8351	106.622	21.5853	260.809	45.3532	50.317	112.251	100.993
tca_00916	ntpD	V-type sodium ATPase subunit D	140.972	135.379	62.2792	155.535	126.409	129.357	141.4	49.4766	75.0819
tca_00992	tca_00992	hypothetical protein	140.533	18.5548	10.4152	125.13	155.936	27.3867	9.72292	11.5375	9.29295
tca_00687	msrB	Peptide methionine sulfoxide reductase MsrB	140.399	156.228	276.435	0	280.799	153.365	159.091	257.431	295.438
tca_00983	tca_00983	hypothetical protein	140.192	57.9607	45.2044	138.686	141.699	0	115.921	38.9103	51.4984
tca_00484	tca_00484	transmembrane protein	139.928	20.8797	19.0925	219.266	60.5898	25.9145	15.8449	12.1304	26.0546
tca_01735	tca_01735	hypothetical protein	139.667	40.4109	44.5945	154.095	125.239	0	80.8217	31.9686	57.2205
tca_01743	menA_1	1,4-dihydroxy-2-naphthoate octaprenyltransferase	139.359	79.4952	67.5001	249.724	28.9942	67.9295	91.0609	17.7626	117.238
tca_01356	cbiH	putative cobalt-factor III C(17)-methyltransferase	139.193	22.5384	23.991	173.357	105.03	18.626	26.4507	22.2327	25.7492
tca_01557	ftsY	Signal recognition particle receptor FtsY	138.991	23.948	19.0001	169.977	108.005	22.3213	25.5748	23.0815	14.9188
tca_00157	bshA_2	N-acetyl-alpha-D-glucosaminyl L-malate synthase	138.429	51.0967	39.2966	160.583	116.274	40.2584	61.935	41.189	37.4041
tca_01846	tca_01846	hypothetical protein	138.018	17.5719	59.6928	0	276.037	7.43352	27.7103	62.6323	56.7534
tca_01569	tca_01569	Putative thiazole biosynthetic enzyme	138.012	215.55	53.2431	145.438	130.586	155.519	275.581	54.0233	52.4628
tca_01341	hicd_2	Homoisocitrate dehydrogenase	137.757	195.569	78.6969	101.788	173.726	285.156	105.983	83.0596	74.3342
tca_00052	dapL	LL-diaminopimelate aminotransferase	137.726	66.0843	120.31	107.979	167.473	67.3538	64.8147	103.793	136.828
tca_01307	tca_01307	hypothetical protein	137.713	616.217	478.646	0	275.426	655.927	576.507	427.946	529.347
tca_00642	hisA_1	1-(5-phosphoribosyl)-5-[(5-phosphoribosylamino)methylideneamino] imidazole-4-carboxamide isomerase	137.589	28.3776	60.6312	145.985	129.194	25.5609	31.1944	70.6674	50.595
tca_01561	tca_01561	hypothetical protein	137.457	210.006	168.712	0	274.914	88.8396	331.172	159.063	178.36
tca_01591	pqqE	Coenzyme PQQ synthesis protein E	136.843	279.124	215.3	115.571	158.114	301.638	256.609	201.002	229.597
tca_00326	pdtaS_3	putative sensor histidine kinase pdtaS	136.026	80.8508	70.0101	137.458	134.593	58.0209	103.681	77.6751	62.345
tca_00577	tca_00577	transmembrane protein	135.892	39.3776	31.8712	149.931	121.854	78.7551	0	41.4727	22.2696
tca_01689	ttcA_2	tRNA 2-thiocytidine biosynthesis protein TtcA	135.872	49.0498	52.4543	145.031	126.712	38.0907	60.0088	65.1908	39.7178
tca_00401	tca_00401	hypothetical protein	135.47	216.466	131.139	0	270.939	92.3432	340.59	149.127	113.152
tca_00869	tca_00869	hypothetical protein	135.224	268.359	53.5753	199.011	71.4367	240.106	296.612	51.2644	55.8862
tca_00896	tca_00896	hypothetical protein	135.115	76.2026	129.071	68.2061	202.025	68.6687	83.7366	121.376	136.766
tca_00254	tca_00254	hypothetical protein	135.075	243.266	817.992	0	270.151	327.376	159.157	807.006	828.979
tca_01363	tca_01363	hypothetical protein	134.896	129.094	250.601	0	269.792	30.7192	227.469	246.813	254.39
tca_01110	tca_01110	hypothetical protein	133.95	114.033	118.791	78.4485	189.452	88.3012	139.764	127.719	109.863
tca_01783	glyQS	Glycine--tRNA ligase	133.596	102.308	66.6875	118.24	148.952	109.984	94.6318	65.686	67.6889
tca_01177	pheA	Prephenate dehydratase	133.419	34.1527	38.1417	142.242	124.597	37.3582	30.9471	44.5921	31.6914
tca_01101	tca_01101	hypothetical protein	133.056	90	38.7399	0	266.113	157.761	22.2388	38.1179	39.3619
tca_01777	tca_01777	hypothetical protein	132.678	105.132	118.887	0	265.356	55.5792	154.684	113.728	124.045
tca_01736	tca_01736	hypothetical protein	131.962	59.1081	97.4983	138.686	125.239	54.6364	63.5798	102.299	92.6972
tca_00489	cobN_4	Aerobic cobaltochelatase subunit CobN	131.747	103.723	155.323	146.479	117.014	103.083	104.362	150.956	159.691
tca_01560	tca_01560	hypothetical protein	130.991	130.707	78.3635	74.6291	187.353	117.603	143.812	79.133	77.5941
tca_00412	pdtaS_5	putative sensor histidine kinase pdtaS	130.851	52.0917	36.0815	113.988	147.713	56.1333	48.0502	34.4209	37.742
tca_01615	rny_2	Ribonuclease Y	130.684	20.4415	97.4227	0	261.368	13.5743	27.3087	40.0302	154.815
tca_00103	hisG_1	ATP phosphoribosyltransferase	130.316	112.958	85.3807	84.3074	176.324	104.069	121.847	93.7485	77.0129
tca_01275	ffh	Signal recognition particle protein	130.247	48.1989	59.6818	162.791	97.7032	21.3777	75.0201	54.729	64.6346
tca_01106	tca_01106	putative ABC transporter ATP-binding protein	129.958	379.69	249.535	0	259.916	292.098	467.282	254.266	244.804
tca_01477	truD	tRNA pseudouridine synthase D	129.866	151.143	104.009	160.022	99.7094	169.863	132.423	102.545	105.473
tca_00387	tca_00387	hypothetical protein	129.497	55.2773	70.8866	159.326	99.6679	70.3758	40.1787	71.3158	70.4574
tca_00766	asd	Aspartate-semialdehyde dehydrogenase	129.247	77.0818	69.2726	79.7044	178.789	92.1073	62.0562	60.4096	78.1356
tca_00874	tca_00874	hypothetical protein	129.06	111.781	357.532	0	258.119	0	223.561	355.447	359.616
tca_01346	purE_2	N5-carboxyaminoimidazole ribonucleotide mutase	129.044	249.135	274.234	132.476	125.613	208.76	289.511	274.834	273.634
tca_00782	tca_00782	hypothetical protein	128.579	426.286	190.057	0	257.157	234.734	617.837	226.764	153.351
tca_00546	tca_00546	hypothetical protein	128.548	141.543	208.442	226.426	30.6707	29.7341	253.351	206.687	210.198
tca_00129	tca_00129	hypothetical protein	128.527	106.059	211.053	65.7798	191.274	0	212.117	217.74	204.365
tca_00977	pyrD_1	Dihydroorotate dehydrogenase	128.517	18.5964	31.4817	148.782	108.252	22.329	14.8638	25.8688	37.0947
tca_01294	tca_01294	hypothetical protein	128.434	69.9319	111.37	163.16	93.7081	59.9929	79.8709	120.954	101.785
tca_00368	ydhY	putative ferredoxin-like protein YdhY	128.347	38.697	50.2318	150.609	106.085	6.59262	70.8013	46.8679	53.5957
tca_01519	tca_01519	hypothetical protein	128.167	22.8725	18.4345	147.277	109.058	18.051	27.694	20.0978	16.7712
tca_00975	tca_00975	hypothetical protein	128.044	58.3163	44.762	71.1209	184.968	42.028	74.6047	39.3459	50.178
tca_00592	tca_00592	hypothetical protein	128.022	29.1678	44.7104	0	256.044	16.1886	42.147	32.9631	56.4576
tca_01162	yjmC	putative oxidoreductase YjmC	127.598	80.0158	97.6882	48.6617	206.534	91.5931	68.4385	99.6073	95.769
tca_00145	paaK_1	Phenylacetate-coenzyme A ligase	127.113	21.2184	27.2702	179.778	74.4475	28.6672	13.7696	25.9301	28.6102
tca_00030	cmk_2	Cytidylate kinase	126.831	55.202	30.8377	0	253.663	37.8981	72.506	35.4796	26.1957
tca_00197	acs	Acetyl-coenzyme A synthetase	126.557	132.91	199.507	52.4167	200.698	127.341	138.479	201.78	197.235
tca_00054	tca_00054	hypothetical protein	125.853	48.5724	15.1203	0	251.707	6.70385	90.441	13.1797	17.0608
tca_00078	tca_00078	hypothetical protein	125.852	17.8795	28.8659	78.1328	173.57	10.2604	25.4987	43.2251	14.5066
tca_01581	dmdA_2	2,3-dimethylmalate dehydratase large subunit	125.592	211.504	211.2	0	251.183	179.556	243.452	228.012	194.389
tca_01493	adoK	Adenosine kinase	125.52	31.7867	24.1664	35.7899	215.249	42.2991	21.2744	25.7399	22.5929
tca_00829	tca_00829	hypothetical protein	125.273	680.131	538.728	108.067	142.479	1291.41	68.8559	490.24	587.216
tca_01330	mat	S-adenosylmethionine synthase	125.173	167.542	161.107	55.1983	195.148	90.6076	244.476	164.901	157.314
tca_00800	tca_00800	hypothetical protein	125.061	51.3769	572.15	149.931	100.191	59.0664	43.6874	617.253	527.047
tca_00924	tca_00924	hypothetical protein	125.051	66.0533	69.867	158.498	91.6032	13.8759	118.231	78.9167	60.8172
tca_00961	tca_00961	hypothetical protein	124.904	18.5932	70.5113	124.196	125.613	21.7458	15.4406	59.5474	81.4752
tca_00937	tca_00937	hypothetical protein	124.872	128.662	91.0842	136.412	113.331	101.51	155.814	89.3024	92.8661
tca_01349	thiL_1	Thiamine-monophosphate kinase	124.837	81.3743	90.8928	16.9129	232.761	79.9557	82.793	96.3735	85.4121
tca_01459	hmdII	H(2)-dependent N5,N10-methylenetetrahydromethanopterin dehydrogenase homolog (II)	124.799	146.526	160.063	0	249.599	104.374	188.679	155.693	164.434
tca_00420	cobN_3	Aerobic cobaltochelatase subunit CobN	124.67	93.9094	66.1911	51.4951	197.846	90.369	97.4499	62.6746	69.7076
tca_01535	pflA_4	Pyruvate formate-lyase 1-activating enzyme	124.503	141.314	99.2357	72.0445	176.961	138.759	143.87	89.6781	108.793
tca_01474	tca_01474	hypothetical protein	124.456	85.8568	114.026	0	248.912	62.6042	109.109	128.274	99.7782
tca_01245	dnaK	Chaperone protein DnaK	124.269	71.1653	76.7538	170.002	78.5369	56.3988	85.9318	71.7746	81.733
tca_01092	mvhD	Methyl viologen-reducing hydrogenase subunit delta	123.828	350.062	223.916	0	247.655	184.686	515.438	221.529	226.303
tca_01340	DmdB_2	2,3-dimethylmalate dehydratase small subunit	123.387	101.694	60.4554	136.133	110.64	129.608	73.7808	60.25	60.6607
tca_00707	rsmA_1	Ribosomal RNA small subunit methyltransferase A	123.126	232.881	214.649	0	246.253	248.68	217.083	191.041	238.258
tca_01068	cobS	Adenosylcobinamide-GDP ribazoletransferase	123.077	34.1998	90.0709	133.138	113.016	37.8812	30.5183	75.497	104.645
tca_01787	frdB	Fumarate reductase iron-sulfur subunit	122.519	111.218	114.143	90.7555	154.282	68.5282	153.908	113.282	115.003
tca_00644	tca_00644	hypothetical protein	122.48	93.6161	52.4208	0	244.961	64.1837	123.048	62.1908	42.6507
tca_01073	ppsA_2	Phosphoenolpyruvate synthase	122.461	73.9879	66.7326	109.923	135	70.2502	77.7255	71.1501	62.3152
tca_00348	wbgU	UDP-N-acetylglucosamine 4-epimerase	122.367	38.6325	41.177	104.34	140.393	27.4038	49.8612	44.2549	38.0992
tca_00455	rhpA	DEAD-box ATP-dependent RNA helicase RhpA	122.338	75.9264	66.2452	161.772	82.9041	59.3056	92.5473	61.1559	71.3344
tca_01236	tca_01236	Magnesium transporter MgtE	122.261	33.67	29.4516	164.368	80.1528	32.3771	34.9629	32.9631	25.94
tca_01605	trpC	Indole-3-glycerol phosphate synthase	122.211	111.158	131.891	0	244.422	106.738	115.578	128.717	135.066
tca_00239	infB	Translation initiation factor IF-2	121.585	127.914	155.708	27.9702	215.2	106.518	149.31	152.16	159.256
tca_00502	tca_00502	hypothetical protein	121.284	344.947	260.019	85.3451	157.223	338.092	351.802	265.978	254.059
tca_00667	tca_00667	hypothetical protein	121.155	201.72	114.28	193.966	48.3439	81.5088	321.93	123.403	105.158
tca_00708	tca_00708	Putative nickel-responsive regulator	120.954	545.914	719.621	40.7899	201.119	332.103	759.724	675.853	763.389
tca_01719	tca_01719	hypothetical protein	120.202	125.467	186.369	96.1982	144.206	164.225	86.7082	211.99	160.747
tca_00376	tca_00376	hypothetical protein	119.814	3.73023	19.7266	106.681	132.946	0	7.46047	23.6076	15.8457
tca_01788	tca_01788	hypothetical protein	119.768	124.048	107.095	143.391	96.1446	132.987	115.109	103.374	110.817
tca_01246	dnaJ	Chaperone protein DnaJ	119.738	170.255	156.851	44.144	195.333	191.3	149.209	170.544	143.157
tca_01170	pyrD_2	Dihydroorotate dehydrogenase B (NAD(+)), catalytic subunit	119.243	113.319	105.827	73.72	164.766	82.2873	144.351	123.371	88.2831
tca_00986	tca_00986	hypothetical protein	119.241	49.0852	129.861	0	238.483	30.7811	67.3894	133.998	125.724
tca_00520	pdtaR_2	putative transcriptional regulatory protein pdtaR	119.159	57.9624	68.1602	106.098	132.219	53.7407	62.1842	65.4045	70.9159
tca_01051	kaiB	Circadian clock protein KaiB	119.13	326.577	286.489	0	238.259	577.458	75.6965	336.84	236.139
tca_00457	tca_00457	hypothetical protein	118.798	309.7	199.982	0	237.596	152.635	466.765	252.826	147.138
tca_00257	menJ_1	Menaquinone reductase	118.574	25.0229	26.3177	112.353	124.795	25.8197	24.2261	24.4742	28.1612
tca_00400	tca_00400	hypothetical protein	118.52	103.193	126.631	66.8365	170.204	52.6616	153.724	134.961	118.302
tca_00312	glfT1_1	Galactofuranosyl transferase GlfT1	118.359	61.7169	83.2275	151.753	84.9644	108.498	14.9361	82.5547	83.9002
tca_00113	tca_00113	3-hexulose-6-phosphate synthase	118.266	25.2097	65.6235	50.203	186.328	16.4816	33.9378	60.4076	70.8395
tca_00585	thiD	Hydroxymethylpyrimidine/phosphomethylpyrimidine kinase	118.014	210.444	170.076	21.8403	214.188	197.896	222.992	157.678	182.475
tca_01186	tca_01186	hypothetical protein	117.385	228.69	85.6741	78.1328	156.637	99.1834	358.196	81.4073	89.941
tca_01570	obg_2	GTPase Obg	117.298	74.9476	59.9377	43.6805	190.915	59.2731	90.6222	62.0241	57.8513
tca_01447	tca_01447	hypothetical protein	117.19	108.254	84.3025	90.2021	144.177	130.298	86.2098	79.8434	88.7616
tca_00131	bsdB	putative UbiX-like flavin prenyltransferase	116.829	98.1049	78.3533	88.9962	144.661	109.078	87.1319	79.5966	77.11
tca_00929	tca_00929	hypothetical protein	116.828	70.1015	94.9707	162.06	71.5972	42.5632	97.6399	96.8971	93.0444
tca_01135	cpdA_2	3',5'-cyclic adenosine monophosphate phosphodiesterase CpdA	116.619	96.3483	69.1389	47.4139	185.824	101.697	90.9993	76.0688	62.209
tca_01426	tca_01426	hypothetical protein	116.55	21.0547	25.0051	126.078	107.022	30.3535	11.7559	18.0186	31.9915
tca_00189	polB_1	DNA polymerase II	116.536	15.4769	36.476	75.3045	157.767	9.88894	21.0648	31.9396	41.0123
tca_00760	pcaF	Beta-ketoadipyl-CoA thiolase	116.313	111.355	136.825	101.125	131.501	75.8839	146.826	128.274	145.376
tca_01394	ilvB_2	Acetolactate synthase large subunit	115.956	165.693	149.559	77.1816	154.73	133.028	198.358	147.578	151.54
tca_01103	tca_01103	hypothetical protein	115.916	109.31	153.141	0	231.832	196.005	22.6156	160.33	145.951
tca_00149	tca_00149	hypothetical protein	115.22	107.092	121.204	0	230.439	64.7542	149.43	114.234	128.174
tca_01410	tca_01410	hypothetical protein	114.846	25.8872	43.8415	138.686	91.0069	32.3771	19.3972	43.051	44.632
tca_00196	satP	Succinate-acetate/proton symporter SatP	113.853	27.6918	57.3861	0	227.707	22.0753	33.3084	65.8746	48.8975
tca_00226	tca_00226	hypothetical protein	113.637	273.191	304.948	0	227.275	85.8444	460.538	308.154	301.742
tca_00657	rph_2	Ribonuclease PH	113.488	27.0523	44.5997	167.379	59.5964	25.1202	28.9843	37.7009	51.4984
tca_00702	tca_00702	hypothetical protein	113.089	263.075	57.8906	112.448	113.73	467.609	58.5411	64.2827	51.4984
tca_00039	rplM	50S ribosomal protein L13	112.981	35.7679	84.8554	0	225.963	0	71.5358	71.8272	97.8836
tca_01460	tca_01460	hypothetical protein	112.94	116.95	55.284	102.366	123.514	126.154	107.747	52.8196	57.7484
tca_01219	tca_01219	hypothetical protein	112.359	49.3837	62.0353	103.368	121.349	49.7723	48.995	52.4205	71.65
tca_00473	tca_00473	hypothetical protein	112.272	120.186	57.9119	81.7301	142.814	93.9115	146.461	66.1272	49.6965
tca_01084	tca_01084	hypothetical protein	111.991	23.8848	135.459	90.9415	133.041	47.7695	0	135.84	135.078
tca_01525	thiC_2	Phosphomethylpyrimidine synthase	111.862	109.106	76.7334	118.31	105.414	98.3973	119.815	79.2699	74.1968
tca_00195	ideR	Iron-dependent repressor IdeR	111.708	29.0644	47.6515	185.688	37.7288	21.3364	36.7925	53.9319	41.3711
tca_00270	tca_00270	hypothetical protein	111.585	17.6186	24.6206	189.37	33.7994	13.1654	22.0718	27.7318	21.5094
tca_01316	tca_01316	hypothetical protein	111.466	15.0017	33.7429	218.977	3.95491	9.58533	20.4181	40.3813	27.1044
tca_00306	mshA_1	D-inositol 3-phosphate glycosyltransferase	111.361	17.5198	9.74497	158.876	63.8449	6.95451	28.0851	7.69077	11.7992
tca_00236	tca_00236	hypothetical protein	111.081	393.6	606.582	0	222.163	200.597	586.602	607.125	606.04
tca_00728	tca_00728	hypothetical protein	110.902	136.096	145.148	43.3393	178.465	174.533	97.6596	145.457	144.839
tca_01691	tca_01691	hypothetical protein	110.113	63.9068	49.9832	96.6451	123.581	50.7655	77.0482	49.7239	50.2424
tca_01208	mrpE	Na(+)/H(+) antiporter subunit E	109.825	35.8729	88.2847	0	219.65	63.042	8.70388	103.283	73.2863
tca_00549	griH	3-amino-4-hydroxybenzoic acid synthase	109.809	92.2971	103.637	0	219.619	99.074	85.5202	94.1155	113.159
tca_01371	tca_01371	hypothetical protein	109.738	76.6702	114.366	121.075	98.4019	88.1698	65.1705	126.961	101.771
tca_00941	tca_00941	hypothetical protein	109.531	88.4937	45.4515	0	219.062	92.604	84.3834	45.5146	45.3885
tca_01069	tca_01069	hypothetical protein	109.156	28.3658	24.8037	184.914	33.397	44.5185	12.2131	25.5749	24.0326
tca_01137	tca_01137	hypothetical protein	108.995	103.331	56.8256	94.0242	123.965	57.6203	149.041	58.9522	54.6989
tca_01154	tca_01154	hypothetical protein	108.836	74.2321	65.9774	37.7376	179.935	84.2466	64.2175	68.8955	63.0593
tca_00343	tca_00343	UDP-glucose 4-epimerase	108.682	105.471	64.7273	50.2788	167.086	114.445	96.4977	67.2209	62.2338
tca_00979	cofD	2-phospho-L-lactate transferase	108.581	30.1381	48.6838	128.583	88.5795	41.0074	19.2688	50.3029	47.0648
tca_00783	rip3	Putative zinc metalloprotease Rip3	108.54	95.8517	184.464	0	217.081	0	191.703	197.869	171.059
tca_00233	thrC	Threonine synthase	107.926	43.9842	46.4637	68.1502	147.702	25.0585	62.9099	47.8822	45.0453
tca_00214	tca_00214	hypothetical protein	107.892	89.6318	80.0017	44.0272	171.756	115.633	63.6311	91.3388	68.6646
tca_00740	mch	Methenyltetrahydromethanopterin cyclohydrolase	107.855	50.5984	22.7979	51.8451	163.864	54.4662	46.7306	18.6434	26.9525
tca_01443	gatA	Glutamyl-tRNA(Gln) amidotransferase subunit A	107.85	86.4152	104.798	36.8192	178.881	43.5157	129.315	106.6	102.997
tca_01641	ykoD_2	Putative HMP/thiamine import ATP-binding protein YkoD	107.353	98.1695	158.328	55.8466	158.86	113.673	82.666	168.382	148.274
tca_00431	pdtaS_7	putative sensor histidine kinase pdtaS	107.331	73.3371	57.6463	29.9861	184.676	59.0664	87.6078	61.1032	54.1894
tca_01315	feoB_2	Ferrous iron transport protein B	107.054	49.1267	68.0778	93.8796	120.229	49.3128	48.9407	75.3081	60.8474
tca_00545	tca_00545	hypothetical protein	106.773	71.1764	65.7248	135.776	77.7707	63.6788	78.674	78.8707	52.5788
tca_01416	hisB	Histidine biosynthesis bifunctional protein HisB	106.614	24.3499	18.2808	88.5228	124.706	23.2495	25.4502	21.2217	15.34
tca_00533	tca_00533	hypothetical protein	106.484	170.656	164.831	0	212.969	212.322	128.99	175.425	154.237
tca_01744	cpcE_3	Phycocyanobilin lyase subunit alpha	106.391	91.385	98.5967	0	212.782	54.0954	128.675	94.1965	102.997
tca_01470	nifD_1	Nitrogenase molybdenum-iron protein alpha chain	106.38	141.451	116.457	61.6381	151.122	107.249	175.653	121.907	111.008
tca_01262	rpsA	30S Ribosomal protein S1	106.357	80.6729	84.2298	0	212.713	50.4336	110.912	72.5932	95.8663
tca_01564	tca_01564	hypothetical protein	106.006	63.3876	54.9901	0	212.011	39.026	87.7493	54.8033	55.1769
tca_00415	mshA_3	D-inositol 3-phosphate glycosyltransferase	105.696	25.8809	51.0315	0	211.392	18.012	33.7497	53.9601	48.1029
tca_01608	trpA	Tryptophan synthase alpha chain	105.594	26.587	58.408	146.536	64.6516	30.239	22.9351	53.852	62.9641
tca_00363	tca_00363	hypothetical protein	105.295	16.016	6.35425	152.682	57.9086	0	32.0321	7.03895	5.66955
tca_00751	prs	Ribose-phosphate pyrophosphokinase	105.289	55.916	123.236	58.1898	152.388	25.4715	86.3606	111.063	135.409
tca_01468	kch_2	Voltage-gated potassium channel Kch	105.206	81.2925	87.7044	32.9224	177.49	84.3054	78.2796	92.8891	82.5198
tca_01223	aiiA	N-acyl homoserine lactonase	105.055	50.5755	99.1009	0	210.109	56.5814	44.5697	116.204	81.9975
tca_00206	aspS2	Aspartate--tRNA(Asp/Asn) ligase	104.995	106.346	62.3717	0	209.989	79.834	132.858	69.7177	55.0257
tca_01350	cbiX	Sirohydrochlorin cobaltochelatase	104.366	29.6346	56.0612	0	208.731	0	59.2693	77.7902	34.3323
tca_01752	ftsH2	ATP-dependent zinc metalloprotease FtsH 2	103.956	76.9408	61.2537	74.2131	133.7	87.7106	66.1711	68.7698	53.7375
tca_01791	paaK_2	Phenylacetate-coenzyme A ligase	103.733	49.9039	64.4648	127.821	79.645	68.82	30.9879	60.1068	68.8228
tca_01389	tca_01389	hypothetical protein	103.499	35.4805	22.7651	0	206.998	34.3625	36.5985	20.2669	25.2634
tca_01476	tca_01476	Phenylacetate-coenzyme A ligase	103.414	127.156	94.4084	98.621	108.206	114.939	139.373	102.299	86.5174
tca_00503	murD_1	UDP-N-acetylmuramoylalanine--D-glutamate ligase	103.412	191.676	120.067	122.411	84.4137	214.088	169.264	113.894	126.241
tca_00584	cofC	2-phospho-L-lactate guanylyltransferase	103.322	190.587	151.176	0	206.644	201.634	179.54	164.41	137.942
tca_00906	ppcA	Phosphoenolpyruvate carboxylase	102.98	58.6196	34.9915	91.693	114.267	54.1848	63.0543	35.5089	34.4742
tca_01218	tca_01218	hypothetical protein	102.734	32.3099	39.4514	98.1846	107.284	38.6806	25.9392	35.7595	43.1432
tca_00051	glnS	Glutamine--tRNA ligase	102.56	169.37	116.738	110.747	94.3723	171.875	166.865	122.815	110.661
tca_01405	soj	Sporulation initiation inhibitor protein Soj	102.499	53.4452	34.9408	107.927	97.0723	19.842	87.0485	37.0189	32.8628
tca_00349	tca_00349	hypothetical protein	102.472	34.1682	22.2761	83.2114	121.732	46.1374	22.199	24.2961	20.2561
tca_00554	tca_00554	hypothetical protein	102.331	106.827	114.538	89.269	115.392	115.553	98.1009	122.054	107.022
tca_01324	natA	ABC transporter ATP-binding protein NatA	102.175	206.72	150.46	0	204.35	211.573	201.868	161.552	139.369
tca_00342	arnC	Undecaprenyl-phosphate 4-deoxy-4-formamido-L-arabinose transferase	102.096	52.8482	37.5231	56.9941	147.199	49.8962	55.8002	38.3623	36.6838
tca_01190	tca_01190	hypothetical protein	101.942	16.0214	30.3438	173.357	30.527	19.9195	12.1233	38.9617	21.7259
tca_01506	fwdA	Tungsten formylmethanofuran dehydrogenase subunit A	101.773	105.717	52.3179	0	203.546	90.7411	120.694	51.1497	53.4861
tca_01014	rpoB_2	DNA-directed RNA polymerase subunit beta	101.269	60.6579	44.05	0	202.539	73.5722	47.7437	46.492	41.608
tca_01553	acsA_3	Acetyl-coenzyme A synthetase	101.195	143.76	160.589	25.4469	176.943	130.325	157.195	175.974	145.204
tca_00409	uvrA	UvrABC system protein A	101.011	163.941	83.7873	11.5451	190.478	182.69	145.193	85.906	81.6687
tca_00661	tca_00661	hypothetical protein	100.993	58.4336	82.2896	0	201.985	64.1067	52.7604	92.0695	72.5098
tca_01635	tca_01635	hypothetical protein	100.965	226.194	699.839	25.4469	176.483	203.842	248.545	691.929	707.749
tca_00591	tca_00591	Magnesium transporter MgtE	100.71	55.5572	38.4905	107.37	94.0503	68.1486	42.9659	39.1048	37.8763
tca_01828	tca_01828	putative cation efflux system protein	100.682	93.5811	93.3669	52.4993	148.864	151.672	35.4902	84.7117	102.022
tca_01064	queC	7-cyano-7-deazaguanine synthase	100.416	87.7185	113.933	0	200.831	111.069	64.3674	111.474	116.391
tca_00317	tca_00317	hypothetical protein	100.045	8.62098	21.4286	123.276	76.8131	0	17.242	8.52495	34.3323
tca_01854	birA	Bifunctional ligase/repressor BirA	99.8086	125.013	80.1171	0	199.617	63.951	186.075	80.8243	79.4098
tca_01721	phrB	(6-4) photolyase	99.6964	43.3763	50.5241	68.628	130.765	43.5589	43.1938	52.2043	48.8439
tca_00137	teaD_1	TRAP-T-associated universal stress protein TeaD	99.4721	32.7208	36.18	126.078	72.8662	33.113	32.3287	30.2248	42.1351
tca_00712	mdcB	2-(5''-triphosphoribosyl)-3'-dephosphocoenzyme-A synthase	99.3898	105.298	47.6318	54.3866	144.393	95.2268	115.369	48.1409	47.1228
tca_00370	ftrII	Formylmethanofuran--tetrahydromethanopterin formyltransferase-like protein	99.2179	46.8658	60.5175	111.693	86.7426	0	93.7315	66.426	54.6091
tca_00927	tca_00927	hypothetical protein	99.1452	247.079	150.83	36.9829	161.308	189.406	304.752	143.731	157.929
tca_01169	tca_01169	hypothetical protein	98.9018	153.285	106.913	0	197.804	147.304	159.266	100.983	112.842
tca_01829	aspC_2	Aspartate aminotransferase	98.8622	84.7429	111.7	44.6174	153.107	85.9339	83.5519	120.126	103.273
tca_00244	rps1	30S ribosomal protein S1	98.5949	98.5711	51.2892	89.9583	107.232	74.8174	122.325	61.3796	41.1988
tca_00275	tca_00275	hypothetical protein	98.5798	96.2236	58.1408	38.5238	158.636	106.237	86.2098	44.756	71.5256
tca_00517	tca_00517	hypothetical protein	98.5718	107.069	80.0756	63.3268	133.817	84.8236	129.315	84.432	75.7192
tca_00304	mftF	Putative mycofactocin biosynthesis glycosyltransferase MftF	98.5018	4.45245	7.5395	33.2181	163.785	0	8.90491	4.59428	10.4847
tca_01140	tca_01140	hypothetical protein	98.1037	426.351	400.857	0	196.207	172.003	680.699	432.641	369.072
tca_01076	tca_01076	hypothetical protein	97.9431	60.5059	83.2614	116.788	79.0982	23.0048	98.007	64.6102	101.913
tca_01392	ilvC	Ketol-acid reductoisomerase	97.7548	91.0058	166.213	0	195.51	84.1411	97.8705	190.296	142.129
tca_00965	tca_00965	hypothetical protein	97.6863	18.7506	34.168	0	195.373	0	37.5013	23.0174	45.3186
tca_01464	pacL	Calcium-transporting ATPase	97.5994	36.4168	32.8979	80.886	114.313	30.0954	42.7383	32.256	33.5397
tca_01138	comB	putative 2-phosphosulfolactate phosphatase	97.3436	31.8976	21.3847	147.931	46.7558	0	63.7953	38.1918	4.57764
tca_00982	tca_00982	hypothetical protein	97.1083	26.3107	62.907	0	194.217	16.8112	35.8102	81.4461	44.3679
tca_01385	surE	5'-nucleotidase SurE	96.7503	52.4168	35.9816	128.512	64.9888	30.9395	73.8942	31.4008	40.5625
tca_01214	kch_1	Voltage-gated potassium channel Kch	96.5745	84.4341	96.4555	60.3919	132.757	90.6358	78.2324	98.0833	94.8276
tca_00454	tca_00454	hypothetical protein	96.5398	97.306	73.6256	91.2406	101.839	107.835	86.777	68.6483	78.6029
tca_01075	minD_1	Septum site-determining protein MinD	96.5344	82.3168	94.1034	0	193.069	66.4676	98.166	100.246	87.9609
tca_00019	rplF	50S ribosomal protein L6	96.251	36.3244	44.2662	0	192.502	0	72.6487	42.2416	46.2907
tca_00507	msrA	Peptide methionine sulfoxide reductase MsrA	96.2201	153.392	65.8864	0	192.44	168.795	137.988	62.6896	69.0833
tca_00167	argB	Acetylglutamate kinase	96.1016	151.059	137.328	0	192.203	183.36	118.758	128.918	145.737
tca_00080	tca_00080	hypothetical protein	95.7871	262.042	108.508	0	191.574	288.192	235.893	126.469	90.5467
tca_00581	egsA	Glycerol-1-phosphate dehydrogenase [NAD(P)+]	95.327	125.457	91.6519	95.6453	95.0088	90.014	160.9	93.9214	89.3824
tca_00302	tca_00302	hypothetical protein	94.5412	65.3383	125.971	0	189.082	43.8186	86.858	132.682	119.26
tca_01507	fwdC	Tungsten formylmethanofuran dehydrogenase subunit C	94.4315	35.5258	14.0237	102.351	86.5118	8.06441	62.9873	11.3247	16.7227
tca_00633	amt_1	Ammonia channel	94.0448	11.8261	25.8043	108.067	80.0227	23.6521	0	32.882	18.7267
tca_00676	acsA_1	Acetyl-coenzyme A synthetase	94.0191	71.9128	69.284	84.052	103.986	68.0655	75.7602	66.2621	72.3059
tca_01759	tca_01759	hypothetical protein	93.7271	121.483	129.647	0	187.454	219.329	23.6382	141.899	117.394
tca_00004	rplW	50S ribosomal protein L23	93.5117	215.383	125.513	0	187.023	291.394	139.373	109.119	141.907
tca_01638	tca_01638	Putative threonylcarbamoyl-AMP synthase	93.4095	57.9745	39.0844	133.352	53.4673	52.535	63.414	46.4774	31.6914
tca_01225	tca_01225	hypothetical protein	92.6469	45.89	43.6283	40.4922	144.802	69.1263	22.6537	48.1629	39.0937
tca_01050	kaiC_5	Circadian clock protein kinase KaiC	92.259	98.0854	130.532	35.1845	149.333	144.773	51.3978	146.961	114.102
tca_01677	tca_01677	hypothetical protein	91.8276	43.7067	50.0229	77.406	106.249	33.883	53.5303	46.3916	53.6542
tca_00562	kaiC_4	Circadian clock protein kinase KaiC	90.6199	37.3597	67.0124	42.4548	138.785	27.8757	46.8436	73.5929	60.4319
tca_01747	menA_2	1,4-dihydroxy-2-naphthoate octaprenyltransferase	90.5983	34.2779	45.8418	0	181.197	38.7492	29.8066	52.238	39.4456
tca_01600	tca_01600	transmembrane protein	90.2374	18.8626	52.7213	43.0033	137.471	5.64717	32.0781	51.1497	54.2929
tca_01601	lagD_3	Lactococcin-G-processing and transport ATP-binding protein LagD	90.0302	108.058	139.179	0	180.06	72.1612	143.954	146.211	132.147
tca_00490	tca_00490	hypothetical protein	89.9295	32.9672	43.8345	115.974	63.8849	25.3828	40.5517	37.4266	50.2424
tca_00700	tca_00700	hypothetical protein	89.915	48.6684	84.4129	0	179.83	49.8109	47.5259	93.1187	75.7071
tca_01355	tca_01355	hypothetical protein	89.8699	77.286	68.6268	0	179.74	51.2502	103.322	61.6881	75.5656
tca_00028	tca_00028	hypothetical protein	89.8539	95.7777	76.0504	0	179.708	42.3986	149.157	71.4472	80.6537
tca_01697	tca_01697	hypothetical protein	89.8446	39.4487	46.8524	62.3307	117.359	49.1113	29.786	47.4141	46.2907
tca_00109	tca_00109	hypothetical protein	89.6872	25.307	60.7721	0	179.374	23.4995	27.1144	81.6745	39.8698
tca_01216	tca_01216	Blue-light-activated histidine kinase 2	89.4563	34.5182	39.9049	0	178.913	11.5633	57.4732	43.8426	35.9672
tca_00932	tca_00932	hypothetical protein	89.3885	99.6571	133.512	44.9185	133.858	115.024	84.2902	131.084	135.939
tca_00459	aplIM	Modification methylase AplI	89.2371	25.1395	38.5038	53.5984	124.876	19.3559	30.9231	35.2118	41.7958
tca_00288	hosA	Transcriptional regulator HosA	88.9451	133.23	183.976	0	177.89	14.867	251.592	189.985	177.967
tca_00215	ribD2	2,5-diamino-6-ribosylamino-4(3H)-pyrimidinone 5'-phosphate reductase	88.9035	53.6329	57.8247	76.6926	101.114	0	107.266	58.6925	56.9568
tca_00715	nth_1	Endonuclease III	88.1336	152.649	111.166	65.7798	110.487	146.849	158.449	111.599	110.732
tca_00575	znuC	High-affinity zinc uptake system ATP-binding protein ZnuC	88.1198	226.562	130.73	0	176.24	219.423	233.701	115.857	145.602
tca_01282	tca_01282	hypothetical protein	88.025	22.0761	111.377	0	176.05	31.2208	12.9315	131.528	91.2258
tca_00634	nrgA	Ammonium transporter NrgA	87.7925	37.3965	47.7035	68.7698	106.815	33.113	41.68	51.9952	43.4119
tca_00910	tca_00910	hypothetical protein	87.784	30.2618	69.1117	45.3468	130.221	33.7445	26.7791	81.5329	56.6904
tca_00073	tca_00073	hypothetical protein	87.4147	32.4791	25.3181	55.1983	119.631	39.8673	25.0909	13.7417	36.8944
tca_00315	cutC	Choline trimethylamine-lyase	87.414	356.443	309.31	0	174.828	384.069	328.818	329.331	289.288
tca_00299	tca_00299	hypothetical protein	87.4005	13.0303	28.4616	63.5202	111.281	16.6829	9.37779	40.4122	16.511
tca_01207	tca_01207	hypothetical protein	87.3759	14.4854	27.6565	0	174.752	16.9415	12.0293	55.3131	0
tca_00357	tca_00357	hypothetical protein	87.3541	29.4193	65.4382	0	174.708	27.3182	31.5205	65.2159	65.6605
tca_01172	tca_01172	hypothetical protein	87.2693	36.3677	66.6915	49.9768	124.562	45.9405	26.795	68.43	64.953
tca_00347	tca_00347	hypothetical protein	87.2291	26.1012	24.7599	45.3777	129.08	26.8154	25.3869	27.6146	21.9053
tca_00265	tca_00265	hypothetical protein	87.0081	25.7663	25.2418	140.244	33.7723	28.6483	22.8844	21.5518	28.9317
tca_00586	purA	Adenylosuccinate synthetase	86.5441	64.0574	50.4236	48.8044	124.284	53.408	74.7068	49.4997	51.3474
tca_01767	tca_01767	hypothetical protein	86.4148	39.9264	80.7014	0	172.83	54.6364	25.2164	82.0953	79.3076
tca_00237	tca_00237	hypothetical protein	86.2756	316.384	671.71	0	172.551	175.376	457.391	744.512	598.908
tca_01574	topA	DNA topoisomerase 1	86.123	22.4396	15.2469	85.7047	86.5414	27.6251	17.2541	14.8708	15.6231
tca_01049	drrA	Daunorubicin/doxorubicin resistance ATP-binding protein DrrA	86.0815	29.6986	27.5277	88.6171	83.5459	39.5663	19.831	33.3372	21.7182
tca_01630	alaS	Alanine--tRNA ligase	85.7103	43.4349	37.5125	0	171.421	51.2216	35.6482	39.3898	35.6351
tca_01540	gpmI	2,3-bisphosphoglycerate-independent phosphoglycerate mutase	85.6769	312.113	138.159	81.1819	90.1719	241.644	382.582	149.706	126.611
tca_01288	dapF	Diaminopimelate epimerase	85.6534	39.0697	37.4339	95.6453	75.6615	32.6562	45.4831	36.5103	38.3575
tca_00862	proC	Pyrroline-5-carboxylate reductase	85.4345	13.2893	43.3945	87.7064	83.1625	0	26.5785	48.5215	38.2676
tca_00621	tca_00621	hypothetical protein	85.4193	163.736	96.2703	0	170.839	164.999	162.472	100.988	91.5528
tca_00690	tca_00690	hypothetical protein	85.3813	235.101	132.013	0	170.763	181.653	288.548	128.992	135.034
tca_01625	tca_01625	hypothetical protein	85.3108	14.0632	13.0127	138.686	31.9359	27.3182	0.808217	6.7134	19.3119
tca_01296	hisF	Imidazole glycerol phosphate synthase subunit HisF	85.307	64.5574	61.5913	59.6498	110.964	60.0543	69.0606	71.4996	51.683
tca_01684	tca_01684	Oxalate oxidoreductase subunit beta	85.2837	38.9588	45.153	0	170.567	40.3313	37.5863	31.8579	58.4481
tca_00984	rnhB	Ribonuclease HII	85.2121	27.4249	22.1828	80.3975	90.0267	21.1155	33.7343	24.4629	19.9028
tca_01036	hypD	Hydrogenase expression/formation protein HypD	85.1874	106.602	89.001	63.5809	106.794	100.193	113.011	80.0222	97.9799
tca_00130	cbiET_1	Cobalamin biosynthesis bifunctional protein CbiET	85.1638	76.7856	56.7381	86.2295	84.0982	90.5888	62.9823	67.5812	45.895
tca_00471	tca_00471	NurA domain-containing protein	84.9613	40.1485	51.7087	89.7158	80.2069	56.9436	23.3533	40.1201	63.2973
tca_01045	tca_01045	CRISPR-assoc_Cas7/Cst2/DevR	84.4495	0.850755	32.0902	72.9925	95.9066	0	1.70151	28.2669	35.9134
tca_00950	tca_00950	hypothetical protein	84.4315	72.8207	65.4975	28.0882	140.775	81.1477	64.4937	62.1566	68.8384
tca_01377	tca_01377	hypothetical protein	84.3275	73.6739	77.7482	0	168.655	48.5657	98.7821	83.9708	71.5256
tca_01136	tca_01136	hypothetical protein	83.9837	56.3393	75.9093	0	167.967	2.38067	110.298	71.7099	80.1087
tca_00754	cobQ	Cobyric acid synthase	83.8935	62.6326	31.5015	32.4411	135.346	31.2411	94.0242	35.2963	27.7068
tca_01685	porA	Pyruvate synthase subunit PorA	83.8291	22.4842	53.2373	101.125	66.5331	7.58839	37.3801	60.3407	46.134
tca_00035	rpsD	30S ribosomal protein S4	83.8043	93.7913	74.7375	64.505	103.104	63.5307	124.052	77.6167	71.8583
tca_00947	dhaT	1,3-propanediol dehydrogenase	83.7237	34.3145	63.2436	81.7803	85.667	0	68.629	62.2091	64.2782
tca_00628	fadD3	3-[(3aS,4S,7aS)-7a-methyl-1,5-dioxo-octahydro-1H-inden-4-yl]propanoyl:CoA ligase	83.6781	43.7837	33.5884	38.3905	128.966	22.6864	64.8811	26.5483	40.6285
tca_01501	fdhF_2	Formate dehydrogenase H	83.5522	97.4007	84.8286	68.9511	98.1533	78.199	116.602	89.1219	80.5354
tca_01607	trpB_2	Tryptophan synthase beta chain	83.2645	50.2841	58.0164	84.6936	81.8354	57.4632	43.1049	48.4165	67.6163
tca_00469	tca_00469	hypothetical protein	83.2385	51.1804	29.1129	94.3609	72.116	61.9571	40.4036	27.6126	30.6132
tca_00134	tca_00134	Bifunctional NMN adenylyltransferase/Nudix hydrolase	83.0313	110.073	134.482	0	166.063	64.3965	155.749	111.908	157.056
tca_00891	tca_00891	hypothetical protein	83.0132	64.8053	269.455	84.052	81.9745	115.895	13.7152	267.373	271.537
tca_01306	tca_01306	hypothetical protein	82.7527	122.318	136.864	0	165.505	152.152	92.4846	152.478	121.25
tca_00515	tca_00515	hypothetical protein	82.6012	44.9032	45.5624	47.5494	117.653	16.6511	73.1552	36.3894	54.7355
tca_01807	nifB	FeMo cofactor biosynthesis protein NifB	82.5924	45.4843	23.0093	76.781	88.4039	52.9349	38.0338	19.6457	26.3729
tca_00062	tca_00062	ATPase domain-containing protein	82.1062	36.7303	14.0973	78.1328	86.0796	0	73.4605	13.6879	14.5066
tca_01411	murG_1	UDP-N-acetylglucosamine--N-acetylmuramyl-(pentapeptide) pyrophosphoryl-undecaprenol N-acetylglucosamine transferase	81.9371	69.4961	105.6	65.4564	98.4178	62.3188	76.6734	105.468	105.731
tca_01032	tca_01032	Nucleoside-triphosphatase THEP1	81.9006	79.7818	77.252	95.0988	68.7024	91.581	67.9826	85.0547	69.4493
tca_00341	rfbB	dTDP-glucose 4,6-dehydratase	81.844	50.5935	50.7965	0	163.688	20.8801	80.3069	61.5751	40.0179
tca_00185	tca_00185	hypothetical protein	81.7092	20.6842	38.5045	0	163.418	10.609	30.7593	35.0102	41.9987
tca_00580	tca_00580	hypothetical protein	81.6102	81.5507	67.9179	112.448	50.7725	98.4439	64.6574	82.9455	52.8903
tca_01471	hddC_1	D-glycero-alpha-D-manno-heptose 1-phosphate guanylyltransferase	81.3649	44.5914	45.0992	49.6785	113.051	41.3171	47.8658	50.8443	39.354
tca_01678	tca_01678	hypothetical protein	81.2292	77.1613	33.776	75.9922	86.4663	64.8651	89.4575	25.2245	42.3275
tca_00716	tca_00716	hypothetical protein	81.1898	29.8628	23.7942	80.011	82.3686	28.0187	31.707	28.7717	18.8167
tca_00205	hisD	Histidinol dehydrogenase	81.1083	46.0617	35.5066	39.1583	123.058	29.1394	62.9839	34.6614	36.3518
tca_00303	tca_00303	putative glycosyltransferase	81.0241	53.5627	12.379	0	162.048	12.6693	94.456	14.0106	10.7475
tca_01588	tyrA	T-protein	81.0206	29.4051	32.6595	50.0897	111.952	42.7553	16.0549	36.0242	29.2948
tca_00463	tca_00463	hypothetical protein	80.8804	88.6584	29.5893	51.3651	110.396	71.9491	105.368	31.416	27.7625
tca_01745	crtN	Dehydrosqualene desaturase	80.7541	157.488	82.1684	33.8258	127.683	176.199	138.777	76.4127	87.9242
tca_00231	trpS	Tryptophan--tRNA ligase	80.2901	166.404	131.79	0	160.58	177.631	155.178	141.678	121.903
tca_00820	tca_00820	putative GMC-type oxidoreductase	79.9188	1481.44	1292.27	14.1516	145.686	1421.66	1541.22	1287.09	1297.45
tca_00384	tca_00384	hypothetical protein	79.8757	32.6495	29.7622	71.1209	88.6305	41.094	24.2051	23.6076	35.9169
tca_00999	tca_00999	hypothetical protein	79.7775	15.9182	34.8019	112.638	46.9169	0	31.8364	37.9728	31.631
tca_00377	cadA	putative cadmium-transporting ATPase	79.7031	14.3826	29.7195	128.158	31.2477	7.21272	21.5525	31.9053	27.5338
tca_00519	tca_00519	Beta-monoglucosyldiacylglycerol synthase	79.5984	139.002	111.602	0	159.197	181.401	96.6027	132.827	90.3767
tca_00462	tca_00462	hypothetical protein	79.1665	72.996	36.6236	0	158.333	62.9089	83.0831	32.333	40.9141
tca_00207	cbiC	Cobalt-precorrin-8 methylmutase	79.1238	62.9527	93.0751	26.9293	131.318	81.3357	44.5697	87.1531	98.997
tca_01708	mutS2	Endonuclease MutS2	79.0615	38.0886	53.3396	25.7222	132.401	51.7934	24.3839	43.6393	63.0398
tca_00506	tca_00506	hypothetical protein	78.3409	41.5692	17.1962	0	156.682	54.2489	28.8895	17.9568	16.4357
tca_01718	rlmE	Ribosomal RNA large subunit methyltransferase E	78.3023	51.0045	85.8304	26.1671	130.437	44.6712	57.3377	83.2389	88.4219
tca_00911	tca_00911	hypothetical protein	78.149	86.254	76.9757	0	156.298	131.127	41.3807	79.7935	74.1578
tca_00837	nadK	NAD kinase	77.7287	23.3195	49.8245	58.8067	96.6507	20.5932	26.0457	63.9823	35.6668
tca_00225	hisI	Phosphoribosyl-AMP cyclohydrolase	76.7651	105.406	57.9942	0	153.53	62.8908	147.921	50.7817	65.2067
tca_00796	DmdB_1	2,3-dimethylmalate dehydratase small subunit	76.7498	38.8889	21.1523	30.3138	123.186	31.8463	45.9315	27.6712	14.6334
tca_00314	hpdA	4-hydroxyphenylacetate decarboxylase activating enzyme	76.6562	254.212	234.057	0	153.312	222.457	285.968	233.778	234.335
tca_00956	mtaD_1	5-methylthioadenosine/S-adenosylhomocysteine deaminase	76.6534	38.9234	59.4049	43.2267	110.08	32.1669	45.68	54.604	64.2059
tca_00781	tca_00781	hypothetical protein	76.6462	135.157	88.0007	0	153.292	138.412	131.901	93.604	82.3975
tca_01395	purD	Phosphoribosylamine--glycine ligase	76.4857	135.968	90.6623	25.3307	127.641	113.098	158.839	83.0307	98.2938
tca_00366	hycE_1	Formate hydrogenlyase subunit 5	76.419	30.6965	11.054	119.621	33.217	31.4171	29.9759	14.8899	7.21811
tca_00903	hsdR	Type-1 restriction enzyme R protein	75.7934	48.0705	64.0823	76.5917	74.9951	53.1636	42.9774	62.9535	65.2111
tca_01681	ttdA_2	L(+)-tartrate dehydratase subunit alpha	75.6762	62.2657	83.514	0	151.352	59.4154	65.1159	90.3282	76.6998
tca_01539	glmM_2	Phosphoglucosamine mutase	75.5418	86.5553	49.9624	86.2933	64.7902	77.7051	95.4056	47.7397	52.1851
tca_00360	tca_00360	hypothetical protein	75.1433	26.851	27.4865	0	150.287	30.3535	23.3485	14.9187	40.0543
tca_00568	tca_00568	hypothetical protein	75.1433	63.0565	67.0393	0	150.287	20.8139	105.299	81.1088	52.9698
tca_01033	pflA_2	Pyruvate formate-lyase 1-activating enzyme	74.6326	96.9801	57.291	49.9768	99.2884	56.8787	137.081	70.0428	44.5392
tca_01432	ybhR	Inner membrane transport permease YbhR	74.2919	65.3091	39.4291	57.7857	90.7981	83.4722	47.146	39.1615	39.6967
tca_00372	tca_00372	Ferredoxin	74.178	21.052	47.8453	65.5208	82.8351	25.8125	16.2916	30.8106	64.8799
tca_01388	tca_01388	hypothetical protein	74.0081	9.87821	47.4265	77.0476	70.9687	0	19.7564	40.4935	54.3595
tca_01614	gltA_3	Glutamate synthase [NADPH] large chain	73.8697	87.4107	69.4146	0	147.739	70.5554	104.266	66.507	72.3223
tca_00230	tca_00230	hypothetical protein	73.8094	57.8605	71.7733	0	147.619	56.0373	59.6837	86.2584	57.2882
tca_00097	tca_00097	hypothetical protein	73.6699	168.363	176.074	0	147.34	85.7041	251.023	186.546	165.603
tca_00614	tca_00614	Magnesium transporter MgtE	73.3542	188.47	106.733	0	146.708	169.113	207.827	117.827	95.64
tca_01235	tca_01235	hypothetical protein	73.3105	45.4442	46.9874	0	146.621	8.88396	82.0045	33.684	60.2909
tca_00034	rpsM	30S ribosomal protein S13	73.1395	218.198	317.446	0	146.279	116.558	319.839	339.634	295.258
tca_01020	rpsG	30S ribosomal protein S7	73.1341	93.4945	33.1938	0	146.268	70.1216	116.867	37.7468	28.6408
tca_00823	tldD	Metalloprotease TldD	72.7588	648.679	1139.14	60.9608	84.5568	795.73	501.628	1193.53	1084.75
tca_01329	ileS	Isoleucine--tRNA ligase	72.6165	57.563	39.5379	69.0111	76.2219	48.798	66.328	39.0598	40.016
tca_01067	tca_01067	hypothetical protein	72.2646	69.7826	138.851	56.6064	87.9228	126.37	13.1954	144.576	133.125
tca_00449	tca_00449	hypothetical protein	72.1533	29.6874	23.3013	94.4243	49.8824	9.29981	50.0751	43.0963	3.50628
tca_00456	tca_00456	hypothetical protein	72.1376	167.506	93.9388	0	144.275	58.2788	276.734	89.0005	98.877
tca_01379	uppP	Undecaprenyl-diphosphatase	71.642	58.8637	66.2096	0	143.284	0	117.727	70.3996	62.0196
tca_01404	thrS	Threonine--tRNA ligase	71.6278	44.4782	50.3701	36.6167	106.639	52.8933	36.063	44.3129	56.4273
tca_01134	tca_01134	hypothetical protein	71.1884	150.607	187.859	0	142.377	88.185	213.029	191.408	184.31
tca_00933	serA	D-3-phosphoglycerate dehydrogenase	71.0932	47.1576	62.3149	42.1858	100.001	42.9335	51.3817	58.0539	66.5759
tca_01713	tyrS	Tyrosine--tRNA ligase	71.0895	62.388	50.0904	52.0071	90.1719	38.7008	86.0751	58.982	41.1988
tca_00548	griI	2-amino-4,5-dihydroxy-6-oxo-7-(phosphonooxy)heptanoate synthase	70.9218	88.9872	81.0454	0	141.844	70.9386	107.036	74.1383	87.9524
tca_00228	tca_00228	hypothetical protein	70.8399	42.9724	36.7481	0	141.68	44.9286	41.0161	34.4754	39.0209
tca_00631	puuR	HTH-type transcriptional regulator PuuR	70.8157	71.4278	89.0932	0	141.631	0	142.856	84.3568	93.8296
tca_01361	cbiG	Cobalt-precorrin-5A hydrolase	70.5492	49.7281	35.3525	33.6208	107.478	79.4711	19.985	66.9596	3.74534
tca_01289	lysA	Diaminopimelate decarboxylase	70.5431	116.038	120.155	38.7932	102.293	106.98	125.095	125.549	114.761
tca_00426	tca_00426	hypothetical protein	70.5048	91.7448	124.609	0	141.01	62.9555	120.534	141.135	108.083
tca_00166	argJ	Arginine biosynthesis bifunctional protein ArgJ	70.3974	38.6223	42.7391	41.6057	99.1891	40.0667	37.178	39.1295	46.3486
tca_01843	tca_01843	hypothetical protein	70.3874	23.6534	18.1732	0	140.775	27.664	19.6428	23.3087	13.0376
tca_01044	tca_01044	CRISPR-assoc_prot_Cas5	70.3057	32.9304	28.6522	0	140.611	62.5309	3.32999	23.7089	33.5956
tca_00119	pnpB	p-benzoquinone reductase	70.2663	98.6958	49.134	54.6545	85.878	50.2403	147.151	98.2679	0
tca_01034	pmbA	Metalloprotease PmbA	70.1546	58.3773	30.9595	90.0975	50.2118	77.7501	39.0045	31.3307	30.5884
tca_00630	tca_00630	hypothetical protein	70.1337	95.4221	57.0345	0	140.267	70.1504	120.694	54.5597	59.5093
tca_00491	tca_00491	hypothetical protein	70.1098	37.4013	73.5013	84.052	56.1677	14.7169	60.0857	68.9746	78.028
tca_00014	tca_00014	hypothetical protein	70.0488	71.2696	53.9397	0	140.098	49.3888	93.1505	52.0167	55.8627
tca_01046	tca_01046	hypothetical protein	69.8346	9.92513	47.0027	39.8379	99.8313	19.6181	0.232163	44.0787	49.9267
tca_00866	tca_00866	Blue-light-activated histidine kinase 2	69.7877	58.4309	35.2176	15.7597	123.816	55.8781	60.9837	33.567	36.8682
tca_01472	hisH1	Imidazole glycerol phosphate synthase subunit HisH 1	69.7575	13.9388	23.7242	83.6296	55.8855	10.9822	16.8954	24.6752	22.7732
tca_00677	acsA_2	Acetyl-coenzyme A synthetase	69.2988	67.5795	40.0259	0	138.598	64.7542	70.4047	50.2972	29.7547
tca_01376	tsaD	tRNA N6-adenosine threonylcarbamoyltransferase	69.1334	17.5644	13.5688	93.3212	44.9455	13.6165	21.5122	15.2015	11.9361
tca_00913	tca_00913	hypothetical protein	69.0506	29.8048	42.5137	0	138.101	32.8146	26.795	49.7673	35.2602
tca_00022	tca_00022	hypothetical protein	68.8114	27.4042	29.902	86.2295	51.3933	22.6472	32.1612	34.1881	25.6158
tca_00946	tca_00946	hypothetical protein	68.7286	29.9239	25.9548	0	137.457	13.3259	46.5218	31.8126	20.097
tca_01781	tca_01781	hypothetical protein	68.6999	64.3859	37.4527	97.3233	40.0764	92.0192	36.7526	38.7661	36.1393
tca_00616	purF_2	Amidophosphoribosyltransferase	68.6572	49.1671	48.2799	0	137.314	36.8077	61.5266	53.6264	42.9334
tca_00013	rplN	50S ribosomal protein L14	68.3139	68.1901	65.2412	41.71	94.9178	10.9547	125.426	57.6876	72.7948
tca_00734	valS_1	Valine--tRNA ligase	68.2215	42.1209	39.8089	63.1826	73.2604	34.0181	50.2236	39.4983	40.1195
tca_01578	tca_01578	hypothetical protein	68.0986	153.68	78.768	0	136.197	73.9868	233.373	85.1163	72.4197
tca_01511	glnB_4	Nitrogen regulatory protein P-II	67.6516	2.96132	11.8518	135.303	0	5.92264	0	23.7035	0
tca_01498	hndC	NADP-reducing hydrogenase subunit HndC	67.6168	39.0944	44.802	70.8937	64.3399	52.3671	25.8216	45.8386	43.7655
tca_00854	tca_00854	hypothetical protein	67.4756	27.5787	67.8754	0	134.951	44.6011	10.5563	51.6716	84.0791
tca_00675	tca_00675	hypothetical protein	67.3415	106.962	81.8751	0	134.683	111.462	102.463	87.2061	76.5441
tca_01546	rtcB	RNA-splicing ligase RtcB	67.1271	47.2548	52.9832	68.9122	65.342	0	94.5096	49.2435	56.7229
tca_01504	fwdG	Tungsten formylmethanofuran dehydrogenase subunit G	66.9952	99.1163	28.7822	0	133.99	114.1	84.1325	20.3366	37.2278
tca_00445	tupA	Tungstate-binding protein TupA	66.9196	49.8935	69.9884	37.7376	96.1016	34.6898	65.0972	74.1149	65.862
tca_00587	comM	Competence protein ComM	66.6472	173.258	122.97	12.5224	120.772	161.155	185.361	108.765	137.174
tca_01352	tca_01352	hypothetical protein	66.5897	67.1569	79.0835	55.29	77.8894	75.0267	59.2872	63.7247	94.4423
tca_00602	tca_00602	hypothetical protein	66.2141	71.8735	46.8857	51.6841	80.744	83.7079	60.039	51.2291	42.5422
tca_00853	proA	4-hydroxy-4-methyl-2-oxoglutarate aldolase/4-carboxy-4-hydroxy-2-oxoadipate aldolase	66.2135	17.7883	41.227	75.3045	57.1225	19.7779	15.7986	39.5774	42.8765
tca_01676	pstB3	Phosphate import ATP-binding protein PstB 3	66.0833	31.8909	45.101	66.3039	65.8626	17.414	46.3678	40.9605	49.2415
tca_01461	cbiET_2	Cobalamin biosynthesis bifunctional protein CbiET	65.7504	26.5054	34.6579	0	131.501	7.00466	46.0062	37.6245	31.6914
tca_00959	carA	Carbamoyl-phosphate synthase small chain	65.3601	56.9621	41.2424	0	130.72	38.3413	75.5829	37.4059	45.079
tca_00958	carB	Carbamoyl-phosphate synthase large chain	65.3108	55.6952	54.565	41.8674	88.7542	46.733	64.6574	55.2996	53.8305
tca_00576	mntB	Manganese transport system membrane protein MntB	65.293	98.2305	39.584	0	130.586	166.433	30.0281	43.6784	35.4896
tca_01298	tca_01298	hypothetical protein	64.948	45.1198	36.1249	0	129.896	51.2502	38.9894	30.844	41.4058
tca_01367	dbpA	ATP-dependent RNA helicase DbpA	64.8592	51.3617	46.4006	97.5867	32.1316	48.3028	54.4207	44.0206	48.7807
tca_01586	ahcY	Adenosylhomocysteinase	64.811	50.3533	61.6304	28.1595	101.463	46.2237	54.4829	56.8619	66.399
tca_01188	tca_01188	hypothetical protein	64.709	43.7562	44.4011	65.0725	64.3456	36.3174	51.195	44.0997	44.7025
tca_00280	rpoC_1	DNA-directed RNA polymerase subunit beta'	64.7047	76.0261	51.2326	34.8895	94.5199	67.1978	84.8543	46.3243	56.1409
tca_01497	nqo2	NADH-quinone oxidoreductase subunit 2	64.5793	21.9405	32.6583	36.9829	92.1758	14.5697	29.3113	37.8508	27.4658
tca_01085	mrtA	Methyl-coenzyme M reductase subunit alpha	63.9259	23.9608	23.3023	80.1073	47.7445	27.6141	20.3076	22.4357	24.1689
tca_00681	ansA	L-asparaginase 1	63.7684	107.62	76.8872	0	127.537	115.288	99.952	71.0934	82.681
tca_00307	tca_00307	Glycogen synthase	63.3997	15.3396	63.6038	42.4548	84.3445	0	30.6793	13.7008	113.507
tca_01323	moeA_2	Molybdopterin molybdenumtransferase	63.1875	51.9389	62.6087	68.4868	57.8882	17.9873	85.8906	60.6219	64.5956
tca_00912	tca_00912	hypothetical protein	62.9878	56.6073	59.8222	0	125.976	42.8521	70.3625	57.5434	62.1011
tca_00247	tca_00247	hypothetical protein	62.4954	175.899	63.3409	0	124.991	122.616	229.182	41.0211	85.6608
tca_01692	dsbD	Thiol:disulfide interchange protein DsbD	62.4071	51.1966	26.3196	0	124.814	43.2152	59.1779	24.7079	27.9314
tca_00246	tca_00246	hypothetical protein	62.3139	72.4511	40.6561	0	124.628	75.5137	69.3884	48.6546	32.6576
tca_00023	rpsE	30S ribosomal protein S5	61.7702	49.6411	70.5639	77.406	46.1345	27.1064	72.1757	63.5208	77.607
tca_00900	tca_00900	hypothetical protein	61.6175	106.298	83.5972	0	123.235	131.127	81.4683	101.276	65.918
tca_01598	tca_01598	hypothetical protein	61.0539	9.09244	34.8966	0	122.108	0	18.1849	31.1694	38.6238
tca_00334	tagF_3	CDP-glycerol:poly(glycerophosphate) glycerophosphotransferase	60.8459	10.0003	5.12613	59.1726	62.5192	0	20.0007	6.95636	3.2959
tca_01687	porC	Pyruvate synthase subunit PorC	60.7161	9.77136	29.6762	62.3307	59.1015	12.2778	7.26487	36.2071	23.1454
tca_00458	nuc	Thermonuclease	60.4703	130.642	119.522	0	120.941	112.075	149.209	113.498	125.547
tca_00928	tca_00928	hypothetical protein	60.4601	164.365	74.2227	0	120.92	160.769	167.961	71.2568	77.1885
tca_00635	glnB_1	Nitrogen regulatory protein P-II	60.4553	26.2636	23.6614	49.0923	71.8184	19.3403	33.187	10.8637	36.4591
tca_01845	tca_01845	hypothetical protein	60.4037	27.4672	43.4566	8.4953	112.312	20.0808	34.8536	45.5883	41.3249
tca_00843	tca_00843	hypothetical protein	60.041	22.5879	52.5219	0	120.082	7.14201	38.0338	51.5258	53.518
tca_01706	otsB	Trehalose-phosphate phosphatase	59.8062	75.4752	101.765	20.9337	98.6787	109.96	40.9903	104.809	98.7216
tca_01452	mtaD_2	5-methylthioadenosine/S-adenosylhomocysteine deaminase	59.6933	66.5916	69.2509	0	119.387	61.2744	71.9087	69.1955	69.3063
tca_00309	tca_00309	hypothetical protein	59.5571	5.80465	8.581	27.668	91.4462	0	11.6093	6.88799	10.274
tca_01419	ytgP	putative cell division protein YtgP	59.4938	47.8393	42.4371	10.6887	108.299	42.109	53.5697	38.4362	46.4379
tca_01531	mtcA1	Beta-carbonic anhydrase 1	59.4156	85.6215	63.0112	0	118.831	72.0014	99.2416	48.1759	77.8465
tca_01424	tca_01424	hypothetical protein	58.4798	30.854	30.194	32.7282	84.2314	36.5317	25.1763	33.0436	27.3443
tca_00777	helY_2	putative helicase HelY	58.448	32.463	25.7899	48.1687	68.7273	23.1934	41.7326	20.8744	30.7053
tca_00202	tca_00202	hypothetical protein	58.0653	86.1125	63.126	0	116.131	74.5041	97.7208	65.3902	60.8618
tca_00660	prcB_1	Proteasome subunit beta	57.9418	625.301	398.115	0	115.884	374.482	876.121	368.524	427.706
tca_00295	tca_00295	hypothetical protein	57.6099	15.8843	13.4214	0	115.22	21.8545	9.91413	15.8564	10.9863
tca_00447	ctpF	putative cation-transporting ATPase F	57.3364	32.4843	45.3737	41.3987	73.2741	19.9337	45.035	49.2411	41.5062
tca_01308	nasD	Nitrite reductase [NAD(P)H]	57.1051	134.554	86.2828	36.9009	77.3093	151.835	117.272	96.2885	76.2771
tca_00885	cysW	Sulfate transport system permease protein CysW	56.98	8.38151	28.7196	61.6381	52.322	0	16.763	23.8699	33.5694
tca_00574	znuA	High-affinity zinc uptake system binding-protein ZnuA	56.8652	99.4042	82.2872	0	113.73	93.5217	105.287	78.2798	86.2947
tca_00124	lutB	Lactate utilization protein B	56.7833	76.9162	3.16889	0	113.567	58.7192	95.1131	2.70565	3.63213
tca_01153	folE2	GTP cyclohydrolase FolE2	56.7077	104.864	81.0196	52.1702	61.2453	66.2259	143.503	77.4461	84.5931
tca_01632	thiI	putative tRNA sulfurtransferase	56.6465	37.7447	51.3941	0	113.293	37.3582	38.1313	49.9693	52.8189
tca_01742	tca_01742	hypothetical protein	56.5808	10.1679	22.6517	67.106	46.0556	0	20.3358	25.3686	19.9349
tca_01724	hflK_2	Modulator of FtsH protease HflK	56.5785	84.1821	72.9316	0	113.157	85.7041	82.66	81.2378	64.6255
tca_00300	tca_00300	hypothetical protein	56.2547	37.8608	48.644	22.4592	90.0503	2.94933	72.7723	42.2451	55.0429
tca_00468	tca_00468	hypothetical protein	56.2109	12.0219	16.0769	63.2787	49.1431	8.30971	15.7341	22.7548	9.39896
tca_01576	SERB	Phosphoserine phosphatase	56.0545	4.50173	1.65702	0	112.109	5.87488	3.12858	1.23749	2.07655
tca_01280	rsmA_2	Ribosomal RNA small subunit methyltransferase A	55.9461	35.1057	31.4611	0	111.892	45.198	25.0134	33.602	29.3203
tca_00465	tca_00465	hypothetical protein	55.8917	19.4774	27.7865	0	111.783	9.03081	29.9241	26.6317	28.9413
tca_00522	polX	DNA polymerase/3'-5' exonuclease PolX	55.742	81.2313	65.0823	30.2038	81.2802	96.5143	65.9482	72.9649	57.1997
tca_01621	yitD	Phosphosulfolactate synthase	55.7047	64.2584	83.3378	0	111.409	50.6283	77.8884	79.9831	86.6924
tca_00373	guaB_3	Inosine-5'-monophosphate dehydrogenase	55.5554	31.8815	45.6344	78.5014	32.6094	13.745	50.018	45.6004	45.6684
tca_00452	tca_00452	hypothetical protein	55.151	17.8947	55.7805	0	110.302	33.4167	2.37275	60.535	51.026
tca_00153	purS	Phosphoribosylformylglycinamidine synthase subunit PurS	54.8104	120.796	143.011	0	109.621	51.4225	190.169	169.697	116.326
tca_00951	tca_00951	hypothetical protein	54.7126	129.524	136.233	0	109.425	130.926	128.123	135.771	136.696
tca_00325	tca_00325	hypothetical protein	54.6497	48.3465	33.7757	0	109.299	49.6694	47.0236	48.8247	18.7267
tca_01675	pstA1	Phosphate transport system permease protein PstA 1	54.5053	57.8808	46.1444	0	109.011	33.3461	82.4154	54.5717	37.7172
tca_00269	tca_00269	hypothetical protein	54.3703	7.8049	5.8613	82.0626	26.6781	12.9317	2.67812	1.36197	10.3606
tca_00746	ectA	L-2,4-diaminobutyric acid acetyltransferase	54.2455	43.1561	32.8112	0	108.491	25.8634	60.4489	29.0555	36.5669
tca_01741	helY_3	putative helicase HelY	54.1589	28.4955	32.8101	0	108.318	33.7652	23.2257	29.3385	36.2816
tca_01328	purL_1	Phosphoribosylformylglycinamidine synthase subunit PurL	54.0965	51.3705	39.753	23.2759	84.9172	38.7167	64.0244	43.7813	35.7248
tca_00261	tca_00261	hypothetical protein	54.0386	68.3471	42.5326	99.9537	8.1236	65.6293	71.0649	44.2376	40.8276
tca_01505	fwdD	Tungsten formylmethanofuran dehydrogenase subunit D	53.9196	68.1456	16.2465	0	107.839	44.4876	91.8036	19.9132	12.5798
tca_01589	tca_01589	hypothetical protein	53.8959	42.7488	24.26	0	107.792	70.3365	15.161	20.1071	28.4129
tca_00172	pdxT	Pyridoxal 5'-phosphate synthase subunit PdxT	53.6611	7.91749	22.1476	57.4863	49.836	3.77453	12.0604	38.9586	5.33663
tca_00321	tagF_1	CDP-glycerol:poly(glycerophosphate) glycerophosphotransferase	53.5683	21.2549	8.3973	42.5634	64.5733	7.45253	35.0572	9.41887	7.37574
tca_00077	tca_00077	hypothetical protein	53.3913	14.6899	7.06674	0	106.783	19.1707	10.2091	14.1335	0
tca_00838	murF	UDP-N-acetylmuramoyl-tripeptide--D-alanyl-D-alanine ligase	53.1836	43.9664	42.3041	0	106.367	41.5802	46.3526	41.3402	43.2681
tca_00436	zupT	Zinc transporter ZupT	53.1783	19.4636	30.8955	0	106.357	5.60373	33.3234	30.0996	31.6914
tca_00704	mraY_2	Phospho-N-acetylmuramoyl-pentapeptide-transferase	53.1366	29.2001	37.3524	15.7597	90.5135	22.7652	35.635	29.6436	45.0611
tca_00749	hypB	Hydrogenase isoenzymes nickel incorporation protein HypB	53.0829	75.4243	85.4976	0	106.166	70.1752	80.6734	74.6129	96.3824
tca_00793	miaB	tRNA-2-methylthio-N(6)-dimethylallyladenosine synthase	53.0423	45.002	25.6886	0	106.085	61.707	28.2971	0	51.3773
tca_00948	pdtaS_11	putative sensor histidine kinase pdtaS	52.9699	38.4004	49.4835	0	105.94	57.7215	19.0792	54.5038	44.4631
tca_01040	cas2	CRISPR-associated endoribonuclease Cas2	52.9419	0	23.8866	0	105.884	0	0	31.3873	16.3859
tca_00904	tca_00904	hypothetical protein	52.5771	19.8464	26.0974	81.5798	23.5744	23.2115	16.4813	27.4554	24.7395
tca_01679	tca_01679	hypothetical protein	52.5404	58.7699	27.5363	50.4312	54.6497	36.4242	81.1156	25.1099	29.9627
tca_00880	tca_00880	hypothetical protein	52.4321	2.62835	8.74989	90.2021	14.6621	0	5.2567	12.4755	5.02424
tca_00435	uvrD1	ATP-dependent DNA helicase UvrD1	52.0594	82.9694	53.6598	48.3963	55.7224	78.6478	87.291	57.899	49.4205
tca_01784	dcd	Deoxycytidine triphosphate deaminase	52.0223	78.7086	30.9793	0	104.045	84.056	73.3613	27.2962	34.6624
tca_00371	iolC	5-dehydro-2-deoxygluconokinase	51.9377	36.7607	30.1278	55.1069	48.7685	21.7098	51.8115	41.1569	19.0988
tca_00670	macB	Macrolide export ATP-binding/permease protein MacB	51.8509	132.035	101.999	0	103.702	141.377	122.692	109.607	94.3907
tca_00848	tca_00848	hypothetical protein	51.6465	26.1035	25.7512	0	103.293	40.5967	11.6103	22.8036	28.6988
tca_01351	tca_01351	hypothetical protein	51.3643	23.1568	16.9741	41.71	61.0186	5.47733	40.8362	18.46	15.4883
tca_01751	htrA	Putative serine protease HtrA	51.3297	5.30623	40.018	50.5845	52.075	0	10.6125	38.7121	41.324
tca_01537	dapH	2,3,4,5-tetrahydropyridine-2,6-dicarboxylate N-acetyltransferase	51.3272	33.0946	14.1748	72.9925	29.6618	28.756	37.4332	16.1525	12.197
tca_00624	tca_00624	hypothetical protein	51.1803	21.1454	42.3093	0	102.361	22.9444	19.3463	48.9346	35.684
tca_00527	bchI_2	Magnesium-chelatase 38 kDa subunit	51.1336	33.8969	22.197	41.5227	60.7446	26.1731	41.6208	24.3497	20.0443
tca_00590	pdtaS_8	putative sensor histidine kinase pdtaS	51.0974	77.6442	64.784	0	102.195	88.3895	66.8988	70.7912	58.7769
tca_00805	wbpI	UDP-2,3-diacetamido-2,3-dideoxy-D-glucuronate 2-epimerase	51.0084	45.5697	393.562	0	102.017	29.8695	61.2699	398.129	388.995
tca_01318	tca_01318	hypothetical protein	50.9633	156.269	204.25	70.2206	31.706	18.4427	294.096	192.944	215.555
tca_00310	tca_00310	hypothetical protein	50.7239	9.67482	6.8767	40.8901	60.5577	5.36967	13.98	5.65537	8.09804
tca_01774	tca_01774	hypothetical protein	50.5274	69.3028	80.7372	0	101.055	62.8004	75.8052	83.3387	78.1356
tca_00666	hflK_1	Modulator of FtsH protease HflK	50.4096	7.70213	21.4912	0	100.819	0	15.4043	17.7982	25.1842
tca_00721	tca_00721	hypothetical protein	50.1772	58.8401	67.3821	24.5461	75.8083	0	117.68	64.2766	70.4876
tca_00136	flr	Flavoredoxin	49.8233	65.0912	33.0439	0	99.6465	51.469	78.7133	35.8604	30.2274
tca_01244	grpE	Protein GrpE	49.8093	21.7251	51.7515	0	99.6185	24.9766	18.4735	55.2417	48.2614
tca_00864	aseR	HTH-type transcriptional repressor AseR	49.671	34.9591	75.1916	0	99.342	37.0416	32.8766	91.0291	59.3541
tca_01805	hadI	2-hydroxyisocaproyl-CoA dehydratase activator	49.6231	34.4477	18.2131	40.2961	58.9502	33.5138	35.3815	15.9765	20.4497
tca_01127	rimO	Ribosomal protein S12 methylthiotransferase RimO	49.5817	4.82562	80.5335	90.0975	9.06601	8.4511	1.20014	157.721	3.34561
tca_01203	mrpD	Na(+)/H(+) antiporter subunit D	49.5038	27.4613	15.0784	33.3513	65.6563	32.1176	22.805	11.993	18.1638
tca_01374	tca_01374	hypothetical protein	49.3478	59.2053	34.8401	0	98.6957	48.9281	69.4826	38.9349	30.7453
tca_01157	tca_01157	hypothetical protein	49.0605	16.8503	17.4979	0	98.121	24.0821	9.61845	17.1204	17.8755
tca_01047	tca_01047	hypothetical protein	48.9102	2.34544	57.0149	23.3085	74.5118	3.06086	1.63002	63.8297	50.2002
tca_01657	tca_01657	Carbon monoxide dehydrogenase/acetyl-CoA synthase subunit alpha	48.8145	4.90891	13.4214	72.2008	25.4281	0	9.81782	11.6501	15.1926
tca_00297	tca_00297	hypothetical protein	48.6844	8.87901	21.6862	0	97.3688	0	17.758	21.6126	21.7599
tca_00512	tca_00512	putative DNA double-strand break repair Rad50 ATPase	48.5539	28.1495	22.2078	39.7191	57.3887	21.7328	34.5662	20.3256	24.09
tca_00807	truA	tRNA pseudouridine synthase A	47.7445	58.7288	730.62	0	95.4889	31.5589	85.8986	771.123	690.116
tca_01746	crtB	All-trans-phytoene synthase	47.6771	44.1532	42.7942	0	95.3542	47.7283	40.5781	52.9135	32.6749
tca_00164	tca_00164	hypothetical protein	47.4786	27.1606	29.0542	0	94.9572	25.3701	28.9511	26.3383	31.7702
tca_01809	prmA_1	Ribosomal protein L11 methyltransferase	47.1841	33.786	44.0385	15.6266	78.7417	30.7811	36.791	39.3348	48.7422
tca_00201	queG	Epoxyqueuosine reductase	47.0892	39.6455	151.643	40.9404	53.2381	13.4407	65.8503	139.86	163.427
tca_00160	tgt	Queuine tRNA-ribosyltransferase	46.921	77.9659	74.8894	0	93.842	73.1863	82.7455	73.0484	76.7303
tca_00224	hisS	Histidine--tRNA ligase	46.9205	43.4494	46.6809	0	93.8409	54.7219	32.1769	47.9078	45.454
tca_00887	tca_00887	Putative binding protein	46.8529	10.7185	17.2913	63.7636	29.9422	5.58226	15.8547	21.1654	13.4172
tca_00038	rplO_2	50S ribosomal protein L15	46.8106	51.0551	44.8227	0	93.6211	59.7119	42.3983	38.9912	50.6542
tca_00007	rplV	50S ribosomal protein L22	46.757	13.3934	25.5039	72.0445	21.4695	14.1913	12.5956	22.9177	28.0901
tca_00336	gpsA	Glycerol-3-phosphate dehydrogenase [NAD(P)+]	45.9523	16.2247	13.5066	17.228	74.6766	13.5743	18.8751	25.7337	1.27946
tca_01195	hycE_2	Formate hydrogenlyase subunit 5	45.6015	35.3032	20.2439	0	91.2029	42.2867	28.3196	40.4879	0
tca_01714	tca_01714	hypothetical protein	45.5543	20.9727	28.2463	0	91.1086	30.9555	10.9899	37.8189	18.6737
tca_00328	kefC	Glutathione-regulated potassium-efflux system protein KefC	45.3662	87.6513	98.8295	20.4325	70.2998	76.4708	98.8317	109.647	88.0121
tca_00543	tca_00543	hypothetical protein	45.1565	37.4994	153.876	0	90.3131	13.6805	61.3183	146.245	161.507
tca_01442	tca_01442	Delta(1)-pyrroline-2-carboxylate reductase	45.1171	26.612	24.4081	50.2788	39.9553	28.6112	24.6128	28.2791	20.5371
tca_00678	tca_00678	hypothetical protein	45.086	23.654	20.5732	0	90.1719	18.2121	29.0958	7.67246	33.474
tca_00884	phnT	Putative 2-aminoethylphosphonate import ATP-binding protein PhnT	45.0728	12.1129	25.7937	46.4868	43.6587	16.279	7.94672	29.1468	22.4407
tca_01757	tca_01757	Ferredoxin	44.8908	50.2986	45.3161	0	89.7816	28.3825	72.2147	47.8283	42.8039
tca_00483	tca_00483	hypothetical protein	44.8702	11.1149	14.0981	67.0384	22.7019	6.60258	15.6272	17.6165	10.5797
tca_00680	korB_2	2-oxoglutarate oxidoreductase subunit KorB	44.5631	5.76687	8.01877	69.633	19.4932	1.52403	10.0097	2.24716	13.7904
tca_00658	pnp	Polyribonucleotide nucleotidyltransferase	44.4928	14.3339	19.7601	53.3407	35.6449	11.6744	16.9933	13.7711	25.7492
tca_00382	tca_00382	hypothetical protein	44.1467	39.1985	61.2082	0	88.2934	0	78.3971	78.6427	43.7737
tca_00627	helY_1	putative helicase HelY	44.1015	19.7152	21.4863	39.9096	48.2935	18.3431	21.0873	18.7672	24.2055
tca_00345	tca_00345	Undecaprenyl-phosphate mannosyltransferase	44.0599	20.7217	11.3289	0	88.1198	17.5539	23.8895	13.5578	9.10013
tca_00322	tca_00322	Oxalate-binding protein	43.9863	236.169	560.273	0	87.9726	367.204	105.134	654.966	465.579
tca_01403	tca_01403	hypothetical protein	43.9863	34.0552	76.3389	0	87.9726	68.1104	0	82.3386	70.3393
tca_01456	cutA	Divalent-cation tolerance protein CutA	43.9517	43.7966	29.4681	0	87.9035	41.235	46.3581	49.2195	9.71669
tca_00974	sirC	Precorrin-2 dehydrogenase	43.7728	27.7255	40.9841	0	87.5456	35.3633	20.0877	40.9694	40.9988
tca_00296	tca_00296	hypothetical protein	43.6769	14.2566	13.4563	45.4707	41.8831	17.9136	10.5996	15.0934	11.8193
tca_01707	tca_01707	hypothetical protein	43.4818	39.5152	53.0404	0	86.9636	47.065	31.9654	56.8969	49.1839
tca_00279	tca_00279	hypothetical protein	43.4161	117.39	49.6772	0	86.8322	145.697	89.0835	30.6898	68.6646
tca_00472	tca_00472	hypothetical protein	43.3464	16.1133	27.5156	0	86.6928	13.8232	18.4034	26.4969	28.5342
tca_00050	ispB	Octaprenyl-diphosphate synthase	43.3342	69.6425	54.0074	0	86.6683	35.7539	103.531	51.7773	56.2376
tca_01532	tca_01532	hypothetical protein	43.1872	46.44	35.8018	23.8087	62.5657	60.9676	31.9124	33.5876	38.016
tca_00362	tca_00362	hypothetical protein	42.939	10.7762	15.2896	0	85.878	0	21.5525	10.9607	19.6185
tca_00492	tca_00492	hypothetical protein	42.7421	60.6634	41.4424	0	85.4841	13.3667	107.96	39.4181	43.4666
tca_01205	tca_01205	hypothetical protein	42.7198	10.6398	17.561	70.2206	15.2189	0	21.2796	11.6544	23.4676
tca_00123	glpC	Anaerobic glycerol-3-phosphate dehydrogenase subunit C	42.6578	14.4187	54.29	0	85.3155	25.4493	3.38816	71.6989	36.881
tca_00098	tca_00098	hypothetical protein	42.6186	249.302	229.809	0	85.2372	108.729	389.874	229.029	230.59
tca_01565	tca_01565	hypothetical protein	42.2038	51.3573	72.6415	0	84.4075	54.8859	47.8288	57.8062	87.4768
tca_00892	tca_00892	hypothetical protein	42.1062	47.1649	48.1653	0	84.2123	40.8203	53.5096	66.1419	30.1887
tca_00968	top6B	Type 2 DNA topoisomerase 6 subunit B	41.794	29.3319	50.9088	0	83.588	6.93795	51.7259	57.8722	43.9453
tca_00365	hycG_1	Formate hydrogenlyase subunit 7	41.354	44.4937	39.6278	0	82.7081	19.5566	69.4308	35.0152	44.2403
tca_00178	tca_00178	hypothetical protein	41.3288	29.8864	24.754	0	82.6576	36.4242	23.3485	19.1811	30.3269
tca_01043	ygcB	CRISPR-associated endonuclease/helicase Cas3	41.1239	0.160241	29.8071	27.4966	54.7512	0	0.320483	26.4305	33.1836
tca_00985	mreB	Rod shape-determining protein MreB	40.9893	13.2637	20.6963	46.6171	35.3615	26.5275	0	22.3511	19.0414
tca_01440	tca_01440	hypothetical protein	40.9872	78.538	95.043	0	81.9745	48.798	108.278	92.51	97.576
tca_00375	tca_00375	hypothetical protein	40.8382	12.2131	18.8014	61.6381	20.0382	0	24.4261	23.8699	13.7329
tca_00516	tca_00516	hypothetical protein	40.7557	21.8449	30.7227	0	81.5114	24.6944	18.9954	34.6778	26.7676
tca_01166	tca_01166	hypothetical protein	40.0764	27.0945	59.1167	0	80.1528	0	54.189	67.2253	51.008
tca_00878	tca_00878	hypothetical protein	39.9258	31.3127	20.151	38.658	41.1935	34.6898	27.9356	19.248	21.054
tca_01596	hypC	Hydrogenase isoenzymes formation protein HypC	39.835	83.8994	134.124	0	79.67	78.9923	88.8065	151.6	116.647
tca_01659	acsD	Corrinoid/iron-sulfur protein small subunit	39.6511	28.363	9.71101	42.8925	36.4096	45.0609	11.665	13.0511	6.37094
tca_00446	nrdR	Transcriptional repressor NrdR	39.636	135.474	71.0756	0	79.272	160.107	110.841	67.4502	74.701
tca_00778	tca_00778	hypothetical protein	39.4139	26.0703	21.1887	71.1209	7.707	14.0093	38.1313	30.4931	11.8843
tca_00563	tca_00563	hypothetical protein	39.3608	103.127	226.384	0	78.7215	63.5979	142.657	253.313	199.454
tca_01802	tca_01802	hypothetical protein	39.3368	9.50345	21.006	0	78.6735	14.6675	4.33942	22.6569	19.3551
tca_00110	guaB_1	Inosine-5'-monophosphate dehydrogenase	38.8496	10.0945	91.3767	0	77.6992	7.43352	12.7555	94.4704	88.2831
tca_01806	tca_01806	hypothetical protein	38.7836	22.213	17.1437	0	77.5673	11.7498	32.6763	6.59996	27.6873
tca_01268	tca_01268	hypothetical protein	38.6451	55.7908	27.1359	0	77.2902	83.2554	28.3261	24.8441	29.4277
tca_00699	tca_00699	hypothetical protein	38.535	40.798	117.045	0	77.07	32.6884	48.9075	91.4793	142.611
tca_00399	coaE	Dephospho-CoA kinase	38.5308	25.8974	48.0571	29.3515	47.71	34.6898	17.1051	50.3378	45.7764
tca_00921	atpE	V-type ATP synthase subunit E	38.4792	272.802	79.2012	0	76.9583	207.636	337.968	83.7669	74.6354
tca_00049	rnj1	Ribonuclease J 1	38.3214	136.895	61.1167	0	76.6428	119.53	154.26	59.2021	63.0314
tca_00008	rpsC	30S ribosomal protein S3	38.297	19.5138	26.7499	0	76.5939	14.0634	24.9642	27.2535	26.2463
tca_00784	tca_00784	hypothetical protein	38.2598	81.6199	96.6117	0	76.5195	97.3982	65.8416	102.299	90.924
tca_01801	tca_01801	hypothetical protein	37.9846	15.7241	34.9286	21.5853	54.3839	0	31.4481	40.6013	29.2559
tca_01733	strL	dTDP-4-dehydrorhamnose reductase	37.9728	13.7215	26.0208	0	75.9455	2.59247	24.8505	27.8502	24.1914
tca_00589	ogt	Methylated-DNA--protein-cysteine methyltransferase	37.5716	86.5512	43.9346	0	75.1433	124.609	48.493	32.3051	55.5641
tca_01766	tca_01766	hypothetical protein	37.3446	15.2305	11.8852	15.4095	59.2797	12.1414	18.3196	17.4761	6.29425
tca_00024	tca_00024	hypothetical protein	37.3261	54.0082	25.3272	0	74.6522	28.568	79.4483	25.0734	25.5809
tca_00006	rpsS	30S ribosomal protein S19	37.2974	40.1477	63.1141	0	74.5948	42.5393	37.7561	66.0839	60.1442
tca_00003	tca_00003	hypothetical protein	37.1296	15.2135	42.0895	0	74.2593	0	30.427	34.9022	49.2769
tca_01453	hisG_2	ATP phosphoribosyltransferase	37.0498	54.9069	43.9051	0	74.0996	58.1776	51.6361	50.6169	37.1933
tca_00070	tca_00070	hypothetical protein	36.6553	40.1351	35.6574	0	73.3105	26.6519	53.6183	41.1693	30.1454
tca_00441	tca_00441	hypothetical protein	36.6553	86.0002	86.3364	0	73.3105	71.0717	100.929	97.3092	75.3636
tca_00448	tca_00448	hypothetical protein	36.6553	59.3228	42.8733	0	73.3105	115.492	3.15402	43.0406	42.706
tca_00187	hypE	Hydrogenase expression/formation protein HypE	36.5682	17.6833	18.731	0	73.1365	10.8084	24.5583	19.1242	18.3377
tca_00919	ntpG	V-type sodium ATPase subunit G	36.5182	116.304	23.289	0	73.0365	177.015	55.5933	15.7751	30.8028
tca_00679	korA_2	2-oxoglutarate oxidoreductase subunit KorA	36.188	43.0992	20.4335	0	72.376	43.3376	42.8607	18.6921	22.175
tca_00742	metE	5-methyltetrahydropteroyltriglutamate--homocysteine methyltransferase	36.0199	17.5934	12.0651	17.3901	54.6497	13.7019	21.4849	12.5068	11.6235
tca_01799	tca_01799	hypothetical protein	35.9115	8.12539	24.4795	44.4981	27.3248	0	16.2508	29.1307	19.8283
tca_01732	rmlA	Glucose-1-phosphate thymidylyltransferase	35.9046	36.0876	45.803	0	71.8093	9.94519	62.23	46.6108	44.9952
tca_01035	ycsE	5-amino-6-(5-phospho-D-ribitylamino)uracil phosphatase YcsE	35.8792	85.5214	53.4831	0	71.7585	101.725	69.3174	64.2827	42.6834
tca_01849	tca_01849	hypothetical protein	35.8376	49.0159	66.4517	0	71.6751	75.6504	22.3814	58.4287	74.4747
tca_01528	tca_01528	hypothetical protein	35.7003	16.3007	38.9395	0	71.4005	16.7468	15.8547	37.6274	40.2517
tca_01794	tca_01794	hypothetical protein	35.6693	52.6233	26.3665	0	71.3386	68.0073	37.2394	22.0947	30.6383
tca_01606	trpF	N-(5'-phosphoribosyl)anthranilate isomerase	35.578	24.5612	50.401	0	71.1561	23.7873	25.3351	44.4689	56.333
tca_01682	cooF_3	Iron-sulfur protein	35.4843	9.71362	46.3028	0	70.9687	5.05892	14.3683	55.4122	37.1933
tca_01393	ilvH	Putative acetolactate synthase small subunit	35.3615	157.081	73.088	0	70.7231	257.112	57.0506	64.9902	81.1858
tca_00211	tca_00211	hypothetical protein	35.1735	20.1036	28.5785	0	70.3469	24.7995	15.4077	37.8725	19.2845
tca_00355	tca_00355	hypothetical protein	34.6815	7.10521	21.7246	0	69.363	0	14.2104	18.5488	24.9003
tca_00298	tca_00298	hypothetical protein	34.2925	49.8954	66.8002	0	68.585	79.6661	20.1247	70.351	63.2494
tca_01072	tca_01072	putative sphingosine-1-phosphate lyase	34.2622	44.7246	40.0307	0	68.5245	56.618	32.8312	37.3684	42.693
tca_01276	tca_01276	hypothetical protein	33.6022	13.5299	10.6727	0	67.2043	8.94945	18.1104	5.65537	15.6899
tca_00476	hmdIII	H(2)-dependent N5,N10-methylenetetrahydromethanopterin dehydrogenase homolog (III)	33.3585	7.30391	13.8228	32.4411	34.2759	2.13007	12.4777	8.97363	18.672
tca_00540	tca_00540	Iron-sulfur cluster carrier protein	33.2772	66.9441	44.2258	21.013	45.5414	110.377	23.5118	44.756	43.6957
tca_00082	tca_00082	hypothetical protein	33.2212	52.7019	79.4338	0	66.4425	53.6778	51.7259	74.3017	84.5659
tca_01201	tca_01201	hypothetical protein	33.063	11.8109	16.6585	0	66.1261	14.5697	9.05203	23.0174	10.2997
tca_01180	guaB_7	Inosine-5'-monophosphate dehydrogenase	33.0417	26.9866	19.7566	0	66.0835	23.2495	30.7237	16.8685	22.6447
tca_01516	tca_01516	hypothetical protein	32.8752	2.02054	12.0536	0	65.7504	0	4.04109	4.79528	19.3119
tca_01798	vapC	tRNA(fMet)-specific endonuclease VapC	32.7277	6.01464	11.9156	32.2525	33.2028	0	12.0293	17.8429	5.98819
tca_01081	slyD	FKBP-type peptidyl-prolyl cis-trans isomerase SlyD	32.6057	35.2314	23.2184	22.1013	43.1101	49.3396	21.1231	20.1746	26.2622
tca_01042	tca_01042	hypothetical protein	32.5461	2.47098	8.32108	0	65.0923	0	4.94197	12.706	3.93619
tca_01694	tca_01694	hypothetical protein	32.4795	40.3816	40.2001	0	64.959	40.0266	40.7365	49.4635	30.9368
tca_01804	tca_01804	hypothetical protein	32.2763	7.21794	22.1701	0	64.5526	4.88916	9.54673	36.0451	8.29505
tca_00994	korA_3	2-oxoglutarate oxidoreductase subunit KorA	32.2654	46.108	38.9782	43.911	20.6198	61.508	30.708	5.66831	72.2881
tca_01599	tca_01599	hypothetical protein	32.0283	33.4244	37.8878	0	64.0566	47.7695	19.0792	30.1867	45.5888
tca_00453	tca_00453	hypothetical protein	31.7914	47.1256	30.0952	0	63.5828	42.028	52.2233	32.4604	27.7299
tca_01515	nifK_2	Nitrogenase molybdenum-iron protein beta chain	31.5865	31.7242	36.001	37.0652	26.1077	34.0717	29.3766	37.5933	34.4088
tca_01041	cas1	CRISPR-associated endonuclease Cas1	31.5416	3.44577	18.2985	0	63.0833	4.49682	2.39472	17.5235	19.0735
tca_00175	tca_00175	hypothetical protein	31.5048	53.9978	18.5492	0	63.0097	74.2931	33.7024	36.5148	0.583552
tca_00367	ndhI_1	NAD(P)H-quinone oxidoreductase subunit I, chloroplastic	31.4003	25.6551	10.5807	16.2206	46.5801	19.1707	32.1396	10.3197	10.8418
tca_00381	tca_00381	hypothetical protein	31.3097	60.3174	62.0384	0	62.6194	50.5892	70.0455	55.4122	68.6646
tca_00276	tca_00276	hypothetical protein	31.2134	16.3634	15.2072	0	62.4267	16.8112	15.9157	12.9842	17.4302
tca_01545	mtnP	S-methyl-5'-thioadenosine phosphorylase	31.02	40.2981	25.6543	0	62.04	41.4796	39.1166	27.8502	23.4584
tca_00434	tca_00434	hypothetical protein	30.91	39.8802	38.2386	0	61.82	56.8322	22.9282	32.6487	43.8285
tca_00995	korB_3	2-oxoglutarate oxidoreductase subunit KorB	30.8952	42.5046	52.5649	0	61.7903	50.7655	34.2436	55.6053	49.5246
tca_01130	tca_01130	Iron-sulfur cluster carrier protein	30.8808	20.5488	38.34	0	61.7616	14.9689	26.1287	31.5306	45.1493
tca_01317	cobN_6	Aerobic cobaltochelatase subunit CobN	30.7056	42.5754	27.9196	25.026	36.3852	42.1754	42.9753	27.8054	28.0337
tca_01597	tca_01597	hypothetical protein	30.0573	5.08022	23.4824	0	60.1146	0	10.1604	17.537	29.4277
tca_01544	sgcG	2-amino-4-deoxychorismate dehydrogenase	29.8999	40.7018	30.9357	0	59.7999	49.5827	31.8209	20.8884	40.9831
tca_00756	tca_00756	hypothetical protein	29.8089	21.4636	37.2978	0	59.6178	30.1027	12.8246	45.6543	28.9413
tca_00121	tca_00121	hypothetical protein	29.5435	16.8738	12.9623	0	59.087	24.9055	8.84204	6.55765	19.3669
tca_01686	porD_2	Pyruvate synthase subunit PorD	29.3242	24.6541	106.408	0	58.6484	17.7679	31.5402	104.795	108.021
tca_00264	clpB1	Chaperone protein ClpB 1	28.5882	18.6114	15.6441	26.9729	30.2035	14.1683	23.0545	13.9273	17.3609
tca_01770	nadC	putative nicotinate-nucleotide pyrophosphorylase [carboxylating]	28.4471	36.2854	34.8183	0	56.8942	41.6277	30.9432	37.2662	32.3705
tca_00318	glfT1_2	Galactofuranosyl transferase GlfT1	28.356	19.0315	15.8114	0	56.7119	27.49	10.5729	17.3716	14.2511
tca_01200	tca_01200	hypothetical protein	28.3007	5.45809	22.9992	0	56.6014	0	10.9162	21.9213	24.0772
tca_00118	ribH_1	6,7-dimethyl-8-ribityllumazine synthase	27.77	28.9982	12.3526	36.0223	19.5177	37.8434	20.153	5.97854	18.7267
tca_00154	purC	Phosphoribosylaminoimidazole-succinocarboxamide synthase	27.7638	122.287	124.732	0	55.5276	64.3641	180.21	146.054	103.411
tca_00020	tca_00020	hypothetical protein	27.5755	6.9008	12.0046	0	55.151	6.68335	7.11824	12.6701	11.3391
tca_01206	tca_01206	hypothetical protein	27.3248	6.61269	16.3145	0	54.6497	0	13.2254	20.9249	11.7042
tca_00905	tca_00905	putative type I restriction enzymeP M protein	27.0487	47.9228	18.068	28.1595	25.9378	60.3989	35.4467	16.6172	19.5189
tca_00464	tca_00464	hypothetical protein	26.5212	11.4101	3.52395	0	53.0423	0	22.8203	3.00881	4.03909
tca_00281	rpoC_2	DNA-directed RNA polymerase subunit beta'	26.4754	17.4432	24.7448	0	52.9507	30.1963	4.69017	20.6719	28.8178
tca_01467	tca_01467	hypothetical protein	26.1368	54.4905	22.608	0	52.2736	31.6733	77.3077	18.3472	26.8688
tca_01734	ppaX	Pyrophosphatase PpaX	25.69	10.3986	30.7216	0	51.38	3.11318	17.6841	26.2306	35.2126
tca_01019	rpsL	30S ribosomal protein S12	25.4005	28.8075	18.7849	0	50.8011	10.2604	47.3547	21.6126	15.9573
tca_00860	tca_00860	hypothetical protein	25.3731	33.5883	94.9863	0	50.7461	0	67.1765	93.6637	96.3088
tca_00316	rfbX_1	Putative O-antigen transporter	25.1511	30.399	11.7133	13.1768	37.1254	38.0681	22.7299	8.74769	14.6789
tca_00485	tca_00485	hypothetical protein	25.1384	15.5703	27.2278	18.7624	31.5144	9.85549	21.2852	26.1227	28.3329
tca_01776	tca_01776	hypothetical protein	25.0478	1.07762	16.676	0	50.0955	0	2.15525	17.9024	15.4495
tca_01304	fprA_3	Nitric oxide reductase	24.9256	51.7212	52.9246	0	49.8512	72.8485	30.594	60.6311	45.2182
tca_01613	tca_01613	hypothetical protein	24.7182	27.2385	31.5716	0	49.4364	19.1707	35.3063	31.2955	31.8477
tca_01690	tca_01690	hypothetical protein	24.6739	19.5582	22.2123	0	49.3478	21.7458	17.3706	22.9029	21.5217
tca_00709	guaB_4	Inosine-5'-monophosphate dehydrogenase	24.4911	28.6889	28.525	0	48.9823	16.1886	41.1891	25.0065	32.0435
tca_01803	tca_01803	hypothetical protein	24.2398	32.1375	27.5042	0	48.4795	5.87488	58.4002	33.4123	21.5961
tca_01131	tca_01131	hypothetical protein	24.0459	10.8109	8.83681	0	48.0917	17.4836	4.13807	6.13796	11.5357
tca_00773	sppA	Putative signal peptide peptidase SppA	24.0041	52.8863	31.4535	0	48.0082	58.1776	47.595	31.4358	31.4713
tca_01792	opuE	Osmoregulated proline transporter OpuE	23.9546	35.2532	38.9751	0	47.9092	55.293	15.2135	47.4615	30.4886
tca_01538	glmU_3	Bifunctional protein GlmU	23.7481	51.8179	28.8951	0	47.4962	61.8525	41.7833	21.3526	36.4376
tca_00488	tca_00488	hypothetical protein	23.7295	2.83585	9.44067	0	47.4589	0	5.6717	13.4604	5.42089
tca_00996	padE	NADH-dependent phenylglyoxylate dehydrogenase subunit gamma	23.7295	14.1679	33.6156	0	47.4589	3.83413	24.5017	37.9585	29.2728
tca_00396	tca_00396	hypothetical protein	23.6799	10.1606	6.46801	41.71	5.64987	16.432	3.88917	5.19189	7.74413
tca_00810	hisA_2	1-(5-phosphoribosyl)-5-[(5-phosphoribosylamino)methylideneamino] imidazole-4-carboxamide isomerase	23.1692	51.4209	583.168	0	46.3384	42.495	60.3469	581.828	584.507
tca_00841	pyrE_1	Orotate phosphoribosyltransferase	22.9502	36.6183	27.4348	0	45.9003	39.4746	33.762	26.4567	28.4129
tca_00706	hycI	Hydrogenase 3 maturation protease	22.9095	23.077	53.0437	0	45.8191	17.7679	28.3862	53.3329	52.7545
tca_01433	ybhF	putative ABC transporter ATP-binding protein YbhF	22.6928	49.9212	18.1932	0	45.3857	62.2637	37.5787	0	36.3864
tca_01643	tca_01643	hypothetical protein	22.6095	15.7545	15.2256	0	45.219	25.7871	5.72189	12.2216	18.2295
tca_00847	tca_00847	hypothetical protein	22.543	22.0831	21.4122	0	45.086	16.8112	27.355	23.0174	19.8071
tca_00867	pdtaS_10	putative sensor histidine kinase pdtaS	22.3969	19.5324	22.003	0	44.7938	22.0276	17.0372	22.2054	21.8006
tca_00776	moaC2	Cyclic pyranopterin monophosphate synthase accessory protein 2	22.0165	12.2039	11.6146	0	44.033	4.64003	19.7679	8.79645	14.4327
tca_01688	tca_01688	hypothetical protein	21.9168	46.6238	26.8822	0	43.8336	38.6318	54.6159	25.2842	28.4802
tca_01513	nifK_1	Nitrogenase molybdenum-iron protein beta chain	21.6833	14.8948	17.8145	36.1789	7.18762	17.4203	12.3692	12.3426	23.2863
tca_01199	tca_01199	hypothetical protein	21.4695	19.2295	1.33762	0	42.939	28.3825	10.0765	0	2.67524
tca_01418	mopA	Molybdenum-pterin-binding protein MopA	21.3741	30.1642	25.7939	0	42.7482	35.6148	24.7135	20.4599	31.128
tca_01547	tca_01547	Protein archease	21.3172	26.5509	19.492	0	42.6345	15.4997	37.6022	14.1478	24.8361
tca_01848	ttdB	L(+)-tartrate dehydratase subunit beta	21.1459	20.8486	11.223	0	42.2917	18.3036	23.3936	10.0243	12.4217
tca_00597	tca_00597	hypothetical protein	20.9702	37.0741	63.8344	0	41.9404	62.1189	12.0293	70.1822	57.4866
tca_00564	tca_00564	hypothetical protein	20.7292	24.2157	39.2375	0	41.4584	20.9335	27.498	37.0394	41.4355
tca_00743	tca_00743	hypothetical protein	20.6276	21.8908	8.29473	0	41.2551	28.568	15.2135	10.5308	6.05864
tca_00696	tca_00696	hypothetical protein	20.3877	32.2037	20.0508	0	40.7754	42.3538	22.0537	32.1173	7.98426
tca_00741	thyA	Thymidylate synthase	20.1277	2.88649	8.82561	0	40.2553	0	5.77298	7.53545	10.1158
tca_01198	ttrB	Tetrathionate reductase subunit B	20.0828	17.8471	11.0181	0	40.1657	35.6941	0	14.6956	7.34054
tca_01663	menJ_2	Menaquinone reductase	19.8565	24.1602	19.4709	0	39.713	24.5345	23.7859	21.8645	17.0772
tca_00047	proB	Glutamate 5-kinase	19.7005	32.4824	11.0572	0	39.401	43.6545	21.3103	9.77017	12.3442
tca_00460	mutY	Adenine DNA glycosylase	19.6397	32.2188	25.0808	0	39.2794	37.2521	27.1855	24.4124	25.7492
tca_00411	rcp1	Response regulator rcp1	19.5578	61.2482	85.0595	0	39.1157	104.782	17.7144	88.2858	81.8332
tca_00258	tca_00258	Ferredoxin-1	19.4816	9.57887	13.7605	0	38.9632	0	19.1577	19.8916	7.6294
tca_00534	sucD	Succinyl-CoA ligase [ADP-forming] subunit alpha	19.2408	68.2075	34.2433	0	38.4817	35.2899	101.125	43.5392	24.9473
tca_00767	dapB	4-hydroxy-tetrahydrodipicolinate reductase	19.1972	27.1061	33.1871	0	38.3944	37.2219	16.9903	23.5214	42.8527
tca_01202	tca_01202	hypothetical protein	18.9551	10.6404	16.6268	0	37.9101	13.1259	8.15499	22.1188	11.1348
tca_00467	tca_00467	tRNA-guanine transglycosylases-like protein	18.9473	7.57738	6.61922	0	37.8946	6.26205	8.89271	6.15555	7.08288
tca_00493	tca_00493	hypothetical protein	18.6747	21.7694	7.58716	0	37.3493	12.9317	30.607	9.07983	6.09449
tca_01482	pyrC_2	Dihydroorotase	18.5998	22.9345	23.2027	0	37.1996	37.8668	8.00215	17.8518	28.5536
tca_01309	arsC	Glutaredoxin arsenate reductase	18.3556	44.4211	70.1525	0	36.7112	0	88.8422	63.2538	77.0511
tca_01366	trmI	tRNA (adenine(58)-N(1))-methyltransferase TrmI	18.3276	13.9302	26.4973	0	36.6553	0	27.8605	26.1986	26.7959
tca_01248	tca_01248	hypothetical protein	18.3041	7.87494	29.7852	0	36.6083	0	15.7499	26.5585	33.0118
tca_00438	tca_00438	hypothetical protein	18.2491	68.0907	67.4296	0	36.4982	36.4242	99.7571	74.5324	60.3268
tca_00344	tuaC	Putative teichuronic acid biosynthesis glycosyltransferase TuaC	18.2166	20.7308	15.6802	0	36.4331	20.2357	21.2259	16.2749	15.0854
tca_01132	apbC	Iron-sulfur cluster carrier protein	18.1665	34.8315	46.4444	0	36.333	21.3475	48.3154	43.8426	49.0461
tca_00021	tca_00021	hypothetical protein	18.1554	40.3566	19.6376	0	36.3109	0	80.7132	18.5375	20.7376
tca_01554	dut	Deoxyuridine 5'-triphosphate nucleotidohydrolase	18.0344	11.9114	31.9577	0	36.0688	4.85657	18.9662	41.9428	21.9727
tca_00945	ypdF	Aminopeptidase YpdF	17.8382	33.506	24.9871	0	35.6763	67.012	0	21.8563	28.1178
tca_00569	tca_00569	hypothetical protein	17.8306	54.2834	61.3324	0	35.6612	49.3888	59.1779	59.8191	62.8456
tca_00835	pdaD	Pyruvoyl-dependent arginine decarboxylase	17.7971	15.5406	16.1938	0	35.5942	19.1707	11.9106	20.1907	12.197
tca_00432	tca_00432	hypothetical protein	17.7194	44.5735	39.8923	0	35.4388	44.5362	44.6108	40.205	39.5796
tca_00494	tca_00494	hypothetical protein	17.1756	34.9769	12.1918	0	34.3512	41.6277	28.3261	20.4599	3.92369
tca_00218	tca_00218	hypothetical protein	17.1336	19.1587	19.1989	0	34.2673	26.1021	12.2154	26.9911	11.4068
tca_01313	acsC_1	Corrinoid/iron-sulfur protein large subunit	16.8743	7.72665	3.21081	27.7371	6.01146	10.9273	4.52602	2.30174	4.11988
tca_00514	tca_00514	hypothetical protein	16.6433	37.4268	53.7995	32.696	0.590517	1.43121	73.4223	52.1546	55.4443
tca_01793	tca_01793	hypothetical protein	16.4376	12.3928	19.657	0	32.8752	22.7652	2.02054	16.7835	22.5306
tca_01312	tusC	Protein TusC	16.4179	7.75174	19.2095	0	32.8357	12.2434	3.26004	14.1844	24.2346
tca_00868	tca_00868	hypothetical protein	16.3774	86.521	17.766	0	32.7548	35.0233	138.019	17.7057	17.8264
tca_00439	tca_00439	hypothetical protein	16.2961	89.638	115.877	0	32.5923	70.2154	109.061	134.961	96.7923
tca_01174	tca_01174	hypothetical protein	16.2961	44.0012	22.4067	0	32.5923	48.2731	39.7292	24.9586	19.8548
tca_00090	gltB	Glutamate synthase [NADPH] large chain	16.1743	41.1821	33.7405	0	32.3487	62.0682	20.296	26.8364	40.6445
tca_01129	tca_01129	Iron-sulfur cluster carrier protein	16.1382	8.08583	5.51599	0	32.2763	4.88916	11.2825	4.11944	6.91254
tca_01319	tca_01319	hypothetical protein	15.8957	151.552	272.412	0	31.7914	119.079	184.025	271.487	273.338
tca_00513	yhaO	putative metallophosphoesterase YhaO	15.7819	32.1284	15.6423	0	31.5638	41.7271	22.5298	26.3683	4.91632
tca_00040	rpsI	30S ribosomal protein S9	15.7016	12.0148	6.90209	0	31.4032	16.3094	7.72028	4.58057	9.2236
tca_00993	tca_00993	Ferredoxin-2	15.4707	5.70506	157.976	0	30.9414	0	11.4101	200.838	115.114
tca_00565	tca_00565	hypothetical protein	15.4404	23.4715	17.9247	0	30.8808	0	46.943	18.9184	16.931
tca_00184	cshA	DEAD-box ATP-dependent RNA helicase CshA	15.1698	10.4424	26.2751	0	30.3395	10.2604	10.6245	23.0534	29.4968
tca_01196	hycG_2	Formate hydrogenlyase subunit 7	15.1295	24.923	4.83878	0	30.259	34.2241	15.6219	0	9.67756
tca_00814	tca_00814	hypothetical protein	14.9291	732.999	1642.08	0	29.8583	120.61	1345.39	1671.68	1612.48
tca_00337	ispD	2-C-methyl-D-erythritol 4-phosphate cytidylyltransferase	14.8991	4.73783	15.2577	0	29.7982	0	9.47565	17.1969	13.3186
tca_00535	tca_00535	hypothetical protein	14.7823	7.15471	25.2585	0	29.5646	0	14.3094	20.1245	30.3925
tca_01082	tca_01082	hypothetical protein	14.7754	15.0687	22.9155	0	29.5507	22.5094	7.62812	25.0001	20.8308
tca_01658	minD_2	Septum site-determining protein MinD	14.2564	6.55095	12.9777	0	28.5129	2.87939	10.2225	14.5564	11.3989
tca_01209	tca_01209	hypothetical protein	14.2163	6.66969	11.6794	0	28.4326	9.84439	3.49499	10.3682	12.9906
tca_01656	tca_01656	hypothetical protein	14.0619	9.79324	9.30538	0	28.1238	12.7804	6.80604	8.97363	9.63714
tca_00695	tca_00695	Putative thiazole biosynthetic enzyme	13.9894	27.365	14.6721	0	27.9789	30.9994	23.7306	15.1	14.2443
tca_01197	ndhI_4	NAD(P)H-quinone oxidoreductase subunit I, chloroplastic	13.8195	15.5328	8.83094	0	27.6389	25.1202	5.94551	14.1103	3.55162
tca_00277	tca_00277	hypothetical protein	13.6624	22.4637	16.9666	0	27.3248	23.1791	21.7484	18.4836	15.4495
tca_00212	tca_00212	(2Z,6E)-farnesyl diphosphate synthase	13.5023	37.4645	24.4523	0	27.0046	28.4564	46.4725	26.3741	22.5306
tca_00074	tca_00074	hypothetical protein	13.3165	14.432	25.9427	0	26.6331	9.22133	19.6428	38.8479	13.0376
tca_01664	carE	Caffeyl-CoA reductase-Etf complex subunit CarE	13.183	17.0151	8.99811	0	26.3661	0	34.0302	10.7684	7.22785
tca_01590	tca_01590	hypothetical protein	13.1607	36.4508	34.7395	0	26.3214	47.3309	25.5707	29.9096	39.5694
tca_00893	tca_00893	hypothetical protein	13.0684	8.87874	3.62142	0	26.1368	7.91832	9.83917	5.00378	2.23906
tca_00495	tca_00495	hypothetical protein	12.9557	3.34435	16.5625	0	25.9115	0	6.6887	25.1339	7.99114
tca_00888	tca_00888	hypothetical protein	12.6824	3.81942	15.1399	0	25.3648	0	7.63885	20.7189	9.56089
tca_00487	tca_00487	hypothetical protein	12.6557	15.586	15.92	0	25.3114	23.0048	8.16725	20.9983	10.8418
tca_00273	pdtaS_2	putative sensor histidine kinase pdtaS	12.5685	21.1116	26.6902	0	25.1369	19.4435	22.7796	19.659	33.7214
tca_00245	tca_00245	hypothetical protein	12.3186	123.238	64.9548	0	24.6371	23.8848	222.591	15.0934	114.816
tca_01514	nifD_2	Nitrogenase molybdenum-iron protein alpha chain	12.2363	4.76046	0.750403	0	24.4726	3.04169	6.47924	0.640706	0.860099
tca_00486	tca_00486	hypothetical protein	11.9697	6.55165	12.9561	0	23.9395	9.67015	3.43314	9.5057	16.4066
tca_01093	tca_01093	hypothetical protein	11.8804	11.5175	14.9176	0	23.7607	23.0351	0	12.7369	17.0983
tca_01133	tca_01133	hypothetical protein	11.5605	24.758	17.0678	0	23.121	37.3582	12.1578	28.8537	5.28189
tca_00068	tca_00068	hypothetical protein	11.1323	20.6746	29.7139	0	22.2647	26.9809	14.3683	49.2553	10.1725
tca_00179	tca_00179	hypothetical protein	10.7348	11.7514	25.049	0	21.4695	17.3449	6.15785	25.5749	24.5231
tca_00637	glnB_2	Nitrogen regulatory protein P-II	10.6398	63.7428	13.8306	0	21.2795	116.042	11.4438	20.3694	7.29182
tca_01509	nifH1_2	Nitrogenase iron protein 1	10.5201	8.38397	10.2299	0	21.0401	7.28485	9.48308	20.4599	0
tca_00425	tca_00425	hypothetical protein	10.1698	24.0564	24.5959	0	20.3395	30.1253	17.9874	25.9594	23.2324
tca_00084	tca_00084	hypothetical protein	10.1154	15.7085	6.91236	0	20.2309	14.0093	17.4078	5.90189	7.92284
tca_01189	hom_2	Homoserine dehydrogenase	9.92459	24.0435	11.2065	0	19.8492	34.3625	13.7244	8.32389	14.0892
tca_01310	tca_01310	hypothetical protein	9.7408	48.1638	69.5655	0	19.4816	10.1178	86.2098	50.4393	88.6918
tca_00374	tca_00374	hypothetical protein	9.66128	12.7622	23.107	0	19.3226	5.20346	20.3209	19.7292	26.4849
tca_00636	amt_2	Ammonia channel	8.10369	15.372	34.1215	0	16.2074	0	30.744	24.8227	43.4203
tca_00879	tca_00879	hypothetical protein	7.94785	6.80776	5.55314	0	15.8957	10.507	3.10853	5.16415	5.94213
tca_01094	tca_01094	hypothetical protein	7.67888	4.71952	16.6703	0	15.3578	0	9.43903	16.801	16.5396
tca_01412	lagD_2	Lactococcin-G-processing and transport ATP-binding protein LagD	7.62323	71.3116	18.979	0	15.2465	126.693	15.9301	15.5673	22.3906
tca_01512	vnfD	Nitrogenase vanadium-iron protein alpha chain	7.35445	10.4415	22.7062	0	14.7089	4.6499	16.2331	24.813	20.5994
tca_00720	tca_00720	hypothetical protein	7.27193	17.7078	18.1994	0	14.5439	7.04985	28.3658	21.7799	14.6189
tca_00272	tca_00272	hypothetical protein	7.06044	15.8535	14.4883	0	14.1209	19.5566	12.1504	8.23888	20.7376
tca_01088	mrtB	Methyl-coenzyme M reductase subunit beta	6.43118	9.80553	6.23505	0	12.8624	16.4073	3.20374	8.29455	4.17555
tca_00263	tca_00263	hypothetical protein	6.32274	3.53633	2.57479	0	12.6455	7.07267	0	2.483	2.66659
tca_00889	por	Pyruvate synthase	6.31835	23.0608	13.4074	0	12.6367	37.1899	8.93165	13.8242	12.9906
tca_01602	tca_01602	hypothetical protein	5.97731	1.10211	11.2207	0	11.9546	0	2.20423	13.078	9.36335
tca_00836	suhB	Inositol-1-monophosphatase	5.8831	9.3881	2.10573	0	11.7662	15.5548	3.22136	0.546082	3.66537
tca_00821	tca_00821	Ferredoxin-2	5.82506	1422.22	1272.74	0	11.6501	1270.61	1573.83	1333.46	1212.01
tca_01655	tca_01655	Carbon monoxide dehydrogenase/acetyl-CoA synthase subunit beta	5.77285	8.69006	6.86987	0	11.5457	10.2604	7.11976	6.09081	7.64894
tca_01368	tca_01368	hypothetical protein	5.61819	9.66839	19.6842	0	11.2364	0	19.3368	14.341	25.0273
tca_00029	tca_00029	hypothetical protein	5.06584	91.3201	113.828	0	10.1317	73.667	108.973	132.759	94.896
tca_01369	tca_01369	hypothetical protein	5.00955	7.87869	6.65635	0	10.0191	8.09428	7.6631	5.6833	7.6294
tca_00895	tca_00895	hypothetical protein	4.92743	10.741	9.99744	0	9.85486	11.9424	9.53961	8.17557	11.8193
tca_01311	dsrE	Putative sulfurtransferase DsrE	4.92743	3.17987	17.2468	0	9.85486	0	6.35974	17.6089	16.8847
tca_00629	lcfB	Long-chain-fatty-acid--CoA ligase	4.91847	20.3615	9.50877	0	9.83694	31.7884	8.93448	12.2759	6.74162
tca_00922	ntpK	V-type sodium ATPase subunit K	4.61002	35.5422	13.8501	0	9.22004	53.6308	17.4535	15.0625	12.6377
tca_01086	mrtG	Methyl-coenzyme M reductase subunit gamma	4.5199	0	10.431	0	9.03979	0	0	6.92252	13.9394
tca_01305	rbr3A	Reverse rubrerythrin-1	4.35613	33.5474	29.2915	0	8.71227	63.3465	3.74825	55.5975	2.98542
tca_00861	tca_00861	hypothetical protein	4.2939	3.69471	7.70235	0	8.5878	0	7.38942	6.57639	8.82831
tca_01434	tca_01434	hypothetical protein	4.23342	18.7902	15.543	0	8.46685	10.2604	27.32	15.1288	15.9573
tca_01850	tca_01850	hypothetical protein	4.13633	0	7.29918	0	8.27266	0	0	7.03895	7.55941
tca_00267	tca_00267	hypothetical protein	4.08943	14.3098	1.22259	0	8.17886	19.8227	8.79692	1.04387	1.40132
tca_00424	tca_00424	hypothetical protein	3.88672	25.8819	29.854	0	7.77344	43.9603	7.80348	33.0709	26.6371
tca_00161	tca_00161	hypothetical protein	3.82085	20.1646	57.4843	0	7.64169	37.0416	3.28766	36.4117	78.557
tca_01463	yloB	Calcium-transporting ATPase	3.57825	1.53946	7.33201	0	7.1565	0	3.07892	7.3071	7.35692
tca_01370	tca_01370	hypothetical protein	3.36965	6.5335	2.29996	0	6.73931	13.067	0	2.75245	1.84748
tca_00174	tca_00174	hypothetical protein	3.2671	2.70814	4.58326	0	6.5342	3.16733	2.24895	2.00151	7.165
tca_01095	tca_01095	hypothetical protein	3.15562	7.29729	4.32533	0	6.31125	0	14.5946	0	8.65066
tca_01096	tca_01096	hypothetical protein	3.05816	5.63873	7.23179	0	6.11631	0	11.2775	8.47539	5.98819
tca_00882	fmdC	Molybdenum formylmethanofuran dehydrogenase, subunit C	2.99824	2.25737	4.79376	0	5.99647	0	4.51473	6.50532	3.0822
tca_00894	tca_00894	hypothetical protein	2.71602	0.389502	4.9511	0	5.43205	0	0.779005	3.69757	6.20463
tca_00886	tca_00886	hypothetical protein	2.54723	30.1007	15.6582	0	5.09446	43.2152	16.9863	15.605	15.7114
tca_00881	fmdE	Molybdenum formylmethanofuran dehydrogenase, subunit E	2.49094	2.14334	8.07708	0	4.98188	0	4.28668	9.32564	6.82852
tca_00668	tca_00668	hypothetical protein	2.46371	7.03115	9.26945	0	4.92743	11.9424	2.11991	5.03112	13.5078
tca_00521	pdtaR_3	putative transcriptional regulatory protein pdtaR	2.3121	13.9262	15.3771	0	4.6242	0	27.8524	21.2468	9.50741
tca_00890	rsxB_1	Electron transport complex subunit RsxB	2.2101	40.3481	68.8093	0	4.42019	74.9911	5.70506	31.5925	106.026
tca_01139	tca_01139	hypothetical protein	1.91855	16.7285	28.1759	0	3.8371	18.5996	14.8574	27.4249	28.9268
tca_00505	tca_00505	hypothetical protein	1.66985	1.43683	16.5126	0	3.3397	0	2.87366	23.8699	9.15528
tca_00268	nrdG	Anaerobic ribonucleoside-triphosphate reductase-activating protein	1.48066	0	7.93702	0	2.96131	0	0	15.874	0
tca_00358	tca_00358	hypothetical protein	1.36006	10.7666	2.78683	0	2.72012	19.7779	1.7554	2.77736	2.7963
tca_00353	tca_00353	hypothetical protein	0.894563	8.81352	9.91579	0	1.78913	13.0087	4.61838	13.7008	6.13077
tca_00266	tca_00266	hypothetical protein	0	21.8545	10.2997	0	0	43.7091	0	0	20.5994
tca_00437	tca_00437	hypothetical protein	0	41.7882	34.2161	0	0	40.4714	43.1049	34.0998	34.3323
tca_01087	mrtD	Methyl-coenzyme M reductase II operon protein D	0	3.9912	9.64726	0	0	0	7.98239	14.2083	5.08627
tca_01097	tca_01097	hypothetical protein	0	0	7.29067	0	0	0	0	8.07627	6.50507
tca_01098	tca_01098	hypothetical protein	0	1.84735	11.7113	0	0	0	3.69471	17.537	5.88554
tca_01204	tca_01204	hypothetical protein	0	9.64487	3.19686	0	0	18.2121	1.07762	6.39371	0
tca_01510	glnB_3	Nitrogen regulatory protein P-II	0	12.1387	5.08646	0	0	20.6175	3.65985	4.3429	5.83001

## Sheet: Table S5
Table S5. TPM normalized read counts of Coriobacteriaceae sp. strain EMTCatB1 transcriptomes sorted by expression levels under the CC condition. CDS of top 10% abundant transcripts in CC condition are coded in red. Cells highlighted with yellow are five highly-expressed genes encoding multiheme c-type cytochromes. Cells highlighted with light blue are highly-expressed genes encoding membrane boun…
CDS	Gene name	Annotated gene product	TPM normalized read counts*			TPM normalized read counts of each replicates
			CC	BrES	OC	CC1	CC2	BrES1	BrES2	OC1	OC2
1c0253	1c0253	hypothetical protein	152845	98171.2	9093.72	294729	10960.9	24355.5	171987	9046.12	9141.32
1d0708	1d0708	hypothetical protein	150461	248450	163965	223233	77688.5	309457	187444	155647	172284
1c0195	1c0195	rRNA (cytosine-N(4)-)-methyltransferase RsmH {ECO:0000255...	37838.3	42593.2	22873.2	29724.3	45952.4	39154.1	46032.3	21037.3	24709
1d0571	1d0571	hypothetical protein	20478.4	7717.22	17392.2	11352	29604.8	10843.1	4591.34	16700.5	18083.9
1c0693	ibpA	Molecular chaperone (small heat shock protein)	18195.1	208195	299512	11853.9	24536.2	230738	185651	307813	291210
1d0309	degV	Hypothetical UPF0230 protein lmo1863	11465.2	14118.6	9447.86	14444.5	8485.82	8428.48	19808.8	9746.15	9149.56
1d0125	1d0125	Multiheme cytochrome c domain-containing protein	10916.9	3942	4286.64	3107.64	18726.2	2778.54	5105.47	4409.31	4163.97
1c0695	1c0695	hypothetical protein	9274.01	22184.7	23858.6	2375.64	16172.4	26689.5	17679.9	22528.7	25188.5
1c0070	lytB	N-acetylmuramoyl-L-alanine amidase cwlB precursor	8922.63	3496.52	3964.36	2699.86	15145.4	2019.71	4973.33	4037.39	3891.33
1c0131	1c0131	hypothetical protein	7545.02	6169.6	5132.27	6324.6	8765.44	3163.19	9176.02	5244.35	5020.18
1c0029	1c0029	hypothetical protein	7408.96	3882.73	2772.77	11035.3	3782.58	5247.98	2517.48	2492.54	3052.99
1d0693	1d0693	hypothetical protein	6493.47	7133.04	3919.34	8719.65	4267.3	6597.57	7668.52	3601.07	4237.61
1c0478	1c0478	hypothetical protein	6286.26	1132.16	5520.4	1684.47	10888.1	784.198	1480.12	5826.26	5214.53
1c0059	hyaC	Probable Ni/Fe-hydrogenase B-type cytochrome subunit, transmembrane	5893.44	910.075	954.945	2535.06	9251.83	462.592	1357.56	947.708	962.181
1d0631	apbE	Membrane-associated lipoprotein involved in thiamine biosynthesis	5542.01	653.851	4639.17	2535.28	8548.73	580.942	726.761	4704.78	4573.56
1d0577	1d0577	hypothetical protein	5184.18	19667.8	42364.2	3063.46	7304.91	22828.8	16506.8	41531.1	43197.3
1c0649	1c0649	Predicted phosphoglycerate mutase, AP superfamily	4870.72	4045.62	7952.99	2883.15	6858.29	3277.51	4813.73	8079.51	7826.48
1c0355	1c0355	hypothetical protein	4617.48	1193.39	417.737	8514.79	720.172	915.608	1471.17	382.467	453.006
1d0588	1d0588	hypothetical protein	4616	3451.81	5246.16	3828.05	5403.95	3364.17	3539.44	5128.22	5364.09
1c0705	erfK	Uncharacterized protein conserved in bacteria	4600.6	2044.55	1385.58	6853.91	2347.29	1499.76	2589.34	1402.21	1368.95
1c0089	1c0089	ACT domain-containing protein	4486.88	1546.01	1264.26	7076.25	1897.5	1244.5	1847.53	1195.68	1332.84
1c0363	1c0363	Multiheme cytochrome c domain-containing protein	4392.42	1262.16	1111.01	2491.5	6293.34	624.157	1900.17	1163.34	1058.67
1c0312	clpX	ATP-dependent Clp protease ATP-binding subunit ClpX {ECO:...	4348.88	1352.87	2917.13	2830.97	5866.79	1274.86	1430.88	2936.49	2897.77
1d0386	ovp1	Pyrophosphate-energized inorganic pyrophosphatase {ECO:00...	4047.7	4728.65	3781.38	2594.99	5500.41	3962.82	5494.48	3880.04	3682.73
1c0337	nuoC	NADH:ubiquinone oxidoreductase 27 kD subunit	3715.46	2522.13	3036.94	27.0518	7403.87	6.21297	5038.05	6071.16	2.71321
1d0630	1d0630	hypothetical protein	3501.15	706.373	353.367	3136.48	3865.81	980.536	432.209	317.754	388.98
1c0062	1c0062	hypothetical protein	3397.44	473.533	902.608	1607.84	5187.05	462.651	484.414	858.036	947.18
1c0708	cyaA	Adenylate cyclase, family 3 (some proteins contain HAMP domain)	3387.11	1241.01	741.486	4493.92	2280.3	1907.79	574.217	633.865	849.107
1d0596	1d0596	Aldehyde:ferredoxin oxidoreductase	3179.55	710.28	1068.86	1100.56	5258.53	687.205	733.355	1123.58	1014.14
1d0274	oppA	ABC-type oligopeptide transport system, periplasmic component	3123.51	608.751	629.709	1489.14	4757.89	268.722	948.78	649.26	610.159
1d0563	1d0563	hypothetical protein	3102.84	297.824	424.353	1466.05	4739.62	236.043	359.605	446.997	401.709
1d0236	fbaB	DhnA-type fructose-1,6-bisphosphate aldolase and related enzymes	3083.84	3165.18	2908.81	3581.48	2586.2	3095.98	3234.38	2785.37	3032.24
1d0796	1d0796	Predicted phosphoesterase	3082.34	923.031	662.526	5587.27	577.402	737.355	1108.71	598.671	726.381
1c0485	veg	Uncharacterized protein conserved in bacteria	3066.55	677.619	1379.09	1374.29	4758.81	716.062	639.176	1324.26	1433.92
1c0650	1c0650	hypothetical protein	3042	549.062	817.742	1525.13	4558.87	355.503	742.62	783.899	851.585
1d0820	1d0820	Glucose/sorbosone dehydrogenases	2953.92	2740.23	3847.23	2111.62	3796.22	2006.96	3473.5	3959.11	3735.34
1d0619	1d0619	hypothetical protein	2908.29	1873.87	1411.88	2010.15	3806.43	1306.7	2441.04	1410.68	1413.09
1c0232	pulO	Type II secretory pathway, prepilin signal peptidase PulO and related peptidases	2862.74	929.22	4216.72	4830.71	894.764	929.642	928.797	4166.83	4266.6
1d0587	1d0587	hypothetical protein	2800.05	699.569	3682.13	1293.87	4306.23	1096.1	303.042	3681.73	3682.54
1c0406	1c0406	Multiheme cytochrome c domain-containing protein	2716.03	900.541	436.599	345.484	5086.58	624.859	1176.22	431.879	441.319
1d0638	1d0638	Bacteriohemerythrin {ECO:0000255	2674.84	2072.53	2431.57	1650.16	3699.52	1205.32	2939.75	2387.32	2475.81
1c0392	ccmC	ABC-type transport system involved in cytochrome c biogenesis, permease component	2658.1	2272.42	1242.16	4076.98	1239.22	2162.28	2382.56	1215.71	1268.61
1d0743	1d0743	hypothetical protein	2627.4	1246.55	1618.47	1761.41	3493.39	1738.93	754.161	1499.3	1737.64
1d0012	infA	Translation initiation factor IF-1 {ECO:0000255	2610.61	171.259	904.138	1008.96	4212.27	98.484	244.033	920.285	887.991
1d0031	ntpI	Archaeal/vacuolar-type H+-ATPase subunit I	2556.92	1571.17	672.619	2145.42	2968.42	1506.97	1635.36	635.774	709.464
1d0751	lytB	N-acetylmuramoyl-L-alanine amidase cwlB precursor	2531.3	2557.01	3498.12	1965.36	3097.23	1702.84	3411.19	3607.66	3388.58
1d0684	1d0684	hypothetical protein	2490.53	111.551	168.654	1491.51	3489.55	114.185	108.916	179.841	157.468
1d0774	cheY	FOG: CheY-like receiver	2464.45	1856.54	2377.62	1273.32	3655.58	1286.09	2427	2472.42	2282.82
1d0898	1d0898	Multiheme cytochrome c domain-containing protein	2347.5	137.39	129.637	1347.34	3347.67	107.632	167.147	135.891	123.383
1d0652	1d0652	hypothetical protein	2345.65	592.44	834.39	1084.39	3606.91	440.943	743.937	930.63	738.149
1d0633	abrB	Regulators of stationary/sporulation gene expression	2289.87	3927.53	9004.55	668.279	3911.47	3445.44	4409.63	9288.73	8720.37
1c0543	purE	Phosphoribosylcarboxyaminoimidazole (NCAIR) mutase	2277.4	297.279	422.009	1338.3	3216.5	142.898	451.66	415.434	428.585
1c0130	gmk	GMP kinase {ECO:0000255	2261.97	1680.43	1487.1	2215.37	2308.57	1149.68	2211.18	1481.24	1492.97
1d0618	1d0618	hypothetical protein	2206.27	3789.35	1777.63	1066.61	3345.93	4434.83	3143.88	1673.37	1881.9
1d0624	pgsA	Capsule biosynthesis protein capA	2199.12	3924.4	2923.57	1816.12	2582.12	3010.13	4838.67	2881.1	2966.04
1c0641	sps1	Serine/threonine protein kinase pksC	2192.23	1351.67	1323.88	3499.82	884.631	1132.21	1571.12	1274.09	1373.67
1d0801	1d0801	hypothetical protein	2137.6	1084.47	1929.89	420.542	3854.65	872.929	1296.01	1983.01	1876.77
1c0353	1c0353	hypothetical protein	2090.74	866.719	1585.99	1613.48	2568.01	621.244	1112.19	1675.87	1496.11
1c0570	lytB	Putative cell wall-binding domain	2068.12	245.211	460.725	629.104	3507.13	156.394	334.027	488.783	432.667
1c0037	1c0037	hypothetical protein	2066.55	1882.78	1343.5	998.166	3134.94	1953.2	1812.36	1295.42	1391.57
1d0648	mmsB	3-hydroxyisobutyrate dehydrogenase and related beta-hydroxyacid dehydrogenases	2059.26	1380.54	1450.47	2577.65	1540.87	1079.22	1681.86	1472.2	1428.75
1d0802	1d0802	hypothetical protein	2048.62	5423.64	766.959	1454.64	2642.61	6714.25	4133.03	579.784	954.134
1c0672	mhpC	Predicted hydrolases or acyltransferases (alpha/beta hydrolase superfamily)	2041.95	1039.81	1036.98	2257.07	1826.84	819.722	1259.89	1075.24	998.724
1c0483	spoVG	Uncharacterized protein, involved in the regulation of septum location	2022.66	210.371	280.042	1455.93	2589.4	244.356	176.385	281.139	278.945
1c0179	pstA	ABC-type phosphate transport system, permease component	2012.58	1282.68	943.955	2833.19	1191.97	985.999	1579.37	925.106	962.803
1d0690	1d0690	Rubrerythrin	1964.94	1736.7	3448.93	933.286	2996.59	1154.95	2318.45	3431.14	3466.72
1c0691	bcp	Peroxiredoxin	1963.96	237.168	509.28	1262.68	2665.23	243.768	230.569	528.506	490.054
1c0060	hyaB	Periplasmic [NiFe] hydrogenase large subunit precursor	1960.26	126.77	208.265	414.794	3505.72	13.8289	239.711	226.969	189.56
1c0158	1c0158	hypothetical protein	1957.37	757.857	886.44	1464.38	2450.36	769.756	745.959	904.053	868.828
1c0468	ntpB	V-ATPase subunit B {ECO:0000255	1903.53	2090.5	768.908	2045.29	1761.77	1848.86	2332.14	0.290372	1537.53
1c0541	1c0541	hypothetical protein	1864.97	904.493	522.974	3014.17	715.774	841.512	967.473	517.594	528.353
1c0052	1c0052	hypothetical protein	1858.96	76.8731	196.726	1187.82	2530.1	50.664	103.082	196.028	197.423
1d0729	1d0729	hypothetical protein	1844.48	2040.53	4717.75	407.252	3281.71	1738.16	2342.89	4831.22	4604.27
1d0049	guaA	Glutamine amidotransferase {ECO:0000255	1843.66	416.363	360.327	3165.21	522.102	325.675	507.05	367.636	353.017
1c0064	trmA	Uncharacterized RNA methyltransferase CT0009	1842.51	581.84	1137.94	725.665	2959.35	620.358	543.323	1174.04	1101.84
1c0072	polC	DNA polymerase III polC-type	1768.38	1344.6	1068.06	1630.92	1905.83	971.329	1717.88	1033.99	1102.12
1c0710	1c0710	Hypothetical 66.3 kDa protein in hag2 5'region	1765.51	64.6378	60.9547	1275.05	2255.96	88.758	40.5177	58.6266	63.2828
1c0495	1c0495	hypothetical protein	1756.12	1478.05	1645.6	1126.03	2386.21	1083.39	1872.72	1659.21	1632
1d0574	1d0574	Desulfoferrodoxin	1728.42	1497.36	1675.58	1021.03	2435.81	1465.62	1529.1	1715.85	1635.3
1d0681	1d0681	hypothetical protein	1689.42	572.761	590.71	1002.42	2376.42	615.618	529.904	590.473	590.946
1c0690	1c0690	Spore germination protein	1631.56	879.413	2328.44	742.944	2520.18	791.112	967.714	2398.64	2258.24
1c0124	1c0124	hypothetical protein	1591.79	181.321	294.774	940.577	2243.01	165.784	196.858	306.536	283.011
1d0029	1d0029	FOG: CBS domain	1584.73	3474.18	7455.6	890.586	2278.87	3289.46	3658.9	7565.89	7345.31
1d0606	ndh	NADH dehydrogenase, FAD-containing subunit	1567.81	1038.91	1195.8	706.63	2428.99	686.933	1390.88	1253.62	1137.98
1d0923	tufB	Elongation factor Tu {ECO:0000255	1548.09	92.4071	110.375	1300.94	1795.24	66.0364	118.778	115.797	104.952
1c0039	1c0039	hypothetical protein	1501.08	628.319	1371.52	494.092	2508.07	901.52	355.117	1352.71	1390.32
1c0668	cda1	Hypothetical 306 kDa protein in fumA 3'region precursor	1477.41	3064.64	2570.57	1064.86	1889.96	3069.74	3059.54	2485.19	2655.95
1c0618	1c0618	hypothetical protein	1462.31	808.184	667.434	1905.56	1019.07	678.301	938.066	637.834	697.034
1d0456	nfo	Endonuclease IV {ECO:0000255	1446.02	1430.41	661.235	1056.17	1835.86	1481.36	1379.46	641.579	680.891
1c0616	1c0616	Uncharacterized conserved protein	1438.37	1406.95	2826.31	1079.46	1797.28	1025.25	1788.64	2908.73	2743.89
1d0032	1d0032	Archaeal/vacuolar-type H+-ATPase subunit E	1409.49	226.413	141.251	822.065	1996.92	117.725	335.101	135.061	147.441
1d0655	1d0655	hypothetical protein	1395.82	707.701	1737.71	154.868	2636.78	657.083	758.32	1767.62	1707.8
1d0592	wecB	UDP-N-acetylglucosamine 2-epimerase	1388.92	129.098	135.902	534.047	2243.8	104.792	153.404	127.756	144.049
1d0564	1d0564	hypothetical protein	1360.77	271.874	253.612	790.92	1930.63	241.232	302.517	241.954	265.269
1d0629	1d0629	hypothetical protein	1357.28	593.727	446.394	722.104	1992.46	431.824	755.629	458.237	434.55
1c0201	med	Uncharacterized ABC-type transport system, periplasmic component/surface lipoprotein	1349.22	984.89	1817.31	252.89	2445.54	1031.63	938.146	1802.35	1832.26
1d0033	ntpC	Archaeal/vacuolar-type H+-ATPase subunit C	1347.36	320.51	212.01	835.855	1858.87	147.217	493.804	233.207	190.812
1c0044	1c0044	hypothetical protein	1338.95	1911.68	947.276	859.605	1818.3	2370.98	1452.38	873.919	1020.63
1c0163	1c0163	hypothetical protein	1326.74	1773.69	1895.34	854.475	1799	1516.63	2030.76	1866.98	1923.7
1c0336	nuoD	NDH-1 subunit D 2 {ECO:0000255	1321.81	230.033	668.138	1848.04	795.568	459.544	0.521048	624.128	712.148
1c0129	1c0129	Transcriptase subunit omega {ECO:0000255	1316.44	2250.19	6797.95	564.312	2068.56	2178.37	2322.01	6771.38	6824.52
1c0015	fer	Ferredoxin	1264.96	454.012	2153.47	717.912	1812.02	329.765	578.259	2236.09	2070.85
1d0036	ntpB	Archaeal/vacuolar-type H+-ATPase subunit B	1264.03	305.853	138.263	970.46	1557.61	206.708	404.997	125.031	151.496
1d0937	tufB	Elongation factor Tu {ECO:0000255	1255.81	73.2952	91.2121	985.135	1526.49	89.8527	56.7376	84.0907	98.3334
1c0408	bisC	Formate dehydrogenase large subunit	1253.14	193.644	194.007	592.93	1913.36	206.93	180.357	192.664	195.351
1d0900	1d0900	hypothetical protein	1248.96	150.898	318.365	451.907	2046.02	166.965	134.831	317.484	319.245
1c0407	hybA	Fe-S-cluster-containing hydrogenase components 1	1241.67	167.107	81.2732	320.919	2162.43	166.965	167.249	75.181	87.3655
1c0590	rpsF	30S ribosomal protein S6 {ECO:0000255	1231.69	3839.07	5304.8	609.493	1853.89	3307.08	4371.06	5612.19	4997.41
1c0491	1c0491	Predicted methyltransferases	1205.89	807.091	5070.07	651.718	1760.06	934.41	679.773	5055.59	5084.54
1d0738	eriC	Chloride channel protein EriC	1202.93	610.076	431.21	1870.33	535.524	397.58	822.571	407.224	455.196
1d0211	1d0211	Ribosome-associated protein Y (PSrp-1)	1177.2	16974.8	15957.6	729.944	1624.46	20239.7	13709.8	15781.5	16133.7
1c0642	1c0642	Multiheme cytochrome c domain-containing protein	1170.92	76.877	113.823	734.389	1607.45	78.7112	75.0428	109.18	118.465
1c0075	1c0075	Uncharacterized protein conserved in bacteria	1165.64	172.74	182.225	601.622	1729.67	177.147	168.333	184.974	179.476
1d0485	acpP	Acyl carrier protein {ECO:0000255	1155.39	44.9486	89.1343	443.311	1867.46	32.1521	57.7451	87.0029	91.2657
1c0619	1c0619	Phospholipid-binding protein	1144.77	1088.3	1383.29	598.26	1691.27	1258.6	917.999	1380.5	1386.09
1c0681	1c0681	hypothetical protein	1141.37	1050.18	908.862	962.15	1320.59	876.541	1223.81	893.888	923.835
1d0285	1d0285	hypothetical protein	1128.49	109.501	243.61	896.542	1360.44	118.144	100.858	267.577	219.642
1c0010	pleD	Response regulator containing a CheY-like receiver domain and a GGDEF domain	1127.57	956.438	763.657	1254.42	1000.72	853.933	1058.94	766.388	760.925
1d0901	1d0901	hypothetical protein	1126.88	187.855	348.307	1013.28	1240.47	183.726	191.984	327.54	369.075
1d0562	porB	Pyruvate:ferredoxin oxidoreductase and related 2-oxoacid:ferredoxin oxidoreductases, beta subunit	1124.19	357.306	707.051	494.829	1753.54	212.909	501.702	736.874	677.229
1c0016	1c0016	Sortase and related acyltransferases	1118.91	374.867	207.683	904.657	1333.16	441.845	307.888	183.362	232.005
1d0268	1d0268	Uncharacterized conserved protein	1109.5	846.803	496.616	1542.47	676.537	840.849	852.757	459.89	533.343
1c0685	trxA	Thioredoxin (TRX)	1106.97	569.978	495.86	976.097	1237.84	353.968	785.988	497.07	494.651
1d0506	rpsB	30S ribosomal protein S2 {ECO:0000255	1092.76	376.89	451.038	1026.27	1159.25	297.397	456.382	477.915	424.162
1d0035	ntpA	Archaeal/vacuolar-type H+-ATPase subunit A	1080.12	351.473	172.657	1206.09	954.154	376.665	326.28	166.103	179.211
1d0685	sdaA	L-serine deaminase	1055.46	1701.05	1534.36	341.649	1769.26	1621	1781.1	1616.99	1451.73
1c0269	1c0269	Uncharacterized protein conserved in bacteria	1053.93	559.67	283.318	1769.86	338.011	470.898	648.442	289.214	277.423
1d0866	lysR	Transcriptional regulator	1049.21	606.514	705.897	554.927	1543.5	346.142	866.886	758.451	653.344
1d0053	1d0053	hypothetical protein	1048.66	65.0814	74.7402	528.275	1569.04	68.753	61.4099	68.2375	81.2428
1d0654	1d0654	Rubrerythrin (RR)	1029.48	578.456	1523.86	523.001	1535.95	422.482	734.43	1518.37	1529.35
1d0067	1d0067	hypothetical protein	1027.92	3991.36	288.809	423.089	1632.76	5115.76	2866.96	138.295	439.323
1c0186	murC	UDP-N-acetylmuramoyl-L-alanine synthetase {ECO:0000255	1022.49	356.967	111.476	1765.35	279.639	277.117	436.818	126.706	96.2455
1d0561	porA	Pyruvate:ferredoxin oxidoreductase and related 2-oxoacid:ferredoxin oxidoreductases, alpha subunit	1017.07	1119.87	1900.46	621.134	1413.01	726.38	1513.37	1964.41	1836.52
1d0037	ntpD	Archaeal/vacuolar-type H+-ATPase subunit D	1014.45	98.3043	78.9333	570.341	1458.55	154.807	41.802	85.9287	71.9378
1d0576	glpG	Uncharacterized membrane protein (homolog of Drosophila rhomboid)	1013.64	2084.21	4619.39	0	2027.27	3058.14	1110.27	4600.92	4637.85
1d0024	rpsI	30S ribosomal protein S9 {ECO:0000255	994.739	128.869	130.771	491.203	1498.27	96.6981	161.039	155.972	105.571
1c0077	1c0077	hypothetical protein	978.632	62.9506	175.158	485.612	1471.65	62.7359	63.1654	163.104	187.212
1c0576	1c0576	hypothetical protein	972.561	92.7403	105.439	419.978	1525.14	85.739	99.7415	112.592	98.2862
1c0061	hyaA	Ni,Fe-hydrogenase I small subunit	969.046	166.926	168.437	242.698	1695.39	134.791	199.061	166.48	170.394
1d0907	1d0907	hypothetical protein	965.508	164.228	247.249	233.321	1697.7	125.036	203.42	248.783	245.715
1c0419	1c0419	hypothetical protein	950.838	276.18	1668.68	586.149	1315.53	371.187	181.174	1665.58	1671.78
1c0534	purC	SAICAR synthetase {ECO:0000255	933.046	288.663	239.754	1304.79	561.305	285.797	291.529	232.317	247.192
1d0842	fpaA	Uncharacterized flavoproteins	928.044	606.99	326.583	1551.56	304.529	680.297	533.683	292.889	360.276
1c0191	murF	Probable UDP-N-acetylmuramoyl-tripeptide--D-alanyl-D-alanine ligase	924.811	381.896	327.634	1351.38	498.241	311.282	452.509	295.551	359.717
1d0669	1d0669	hypothetical protein	923.763	496.764	410.006	557.286	1290.24	383.975	609.553	428.08	391.932
1d0826	eno	2-phosphoglycerate dehydratase {ECO:0000255	918.18	1069.82	739.03	604.786	1231.57	753.464	1386.18	726.595	751.465
1c0664	ahpC	Selenocysteine-containing peroxiredoxin PrxU	907.379	347.32	1939.43	334.311	1480.45	252.738	441.903	1994.17	1884.69
1c0636	sps1	Serine/threonine-protein kinase PknB	904.993	425.749	648.011	685.12	1124.87	483.943	367.554	639.407	656.615
1c0617	1c0617	hypothetical protein	897.932	118.368	557.221	349.3	1446.56	107.801	128.936	562.66	551.782
1d0270	gapA	Glyceraldehyde-3-phosphate dehydrogenase/erythrose-4-phosphate dehydrogenase	896.975	712.763	1119.2	424.729	1369.22	600.686	824.84	1128.58	1109.82
1d0351	rpmA	50S ribosomal protein L27 {ECO:0000255	896.316	124.803	150.255	307.435	1485.2	126.087	123.519	157.348	143.162
1d0457	chlI	Mg-chelatase subunit ChlI	894.815	1315.76	702.408	806.859	982.772	1532.08	1099.45	689.023	715.793
1d0379	recO	Recombination protein O {ECO:0000255	888.488	410.68	420.864	1139.43	637.544	371.88	449.48	403.396	438.331
1d0773	1d0773	Soluble P-type ATPase	888.281	669.47	739.711	332.892	1443.67	729.055	609.884	758.002	721.421
1d0529	dapA	4-hydroxy-tetrahydrodipicolinate synthase {ECO:0000255	881.787	738.7	558.816	781.217	982.357	534.157	943.243	584.706	532.925
1d0636	ecm27	Ca2+/Na+ antiporter	878.631	1149.66	585.729	622.19	1135.07	900.62	1398.7	543.224	628.234
1d0566	1d0566	Rubrerythrin	870.272	336.515	467.925	223.989	1516.55	289.063	383.967	489.751	446.099
1d0256	1d0256	hypothetical protein	869.171	283.827	527.633	543.615	1194.73	236.445	331.209	534.645	520.622
1d0327	napF	Ferredoxin	852.701	147.4	96.3054	158.184	1547.22	145.32	149.479	87.8992	104.712
1d0609	phnP	Metal-dependent hydrolases of the beta-lactamase superfamily I	849.279	329.134	288.265	653.637	1044.92	236.788	421.48	298.077	278.452
1d0458	metK	Methionine adenosyltransferase {ECO:0000255	846.047	270.675	173.288	562.22	1129.87	171.478	369.872	191.394	155.183
1d0013	rpmJ	50S ribosomal protein L36 {ECO:0000255	838.303	86.9143	125.308	147.361	1529.24	124.096	49.7326	107.743	142.872
1d0661	1d0661	Predicted Fe-S oxidoreductases	832.807	96.2919	168.747	664.746	1000.87	69.764	122.82	170.594	166.901
1c0629	1c0629	hypothetical protein	826.492	505.378	480.201	1034.18	618.803	446.075	564.682	490.265	470.138
1d0138	hisD	Histidinol dehydrogenase	823.164	606.37	431.916	899.654	746.675	378.488	834.253	435.86	427.973
1c0202	xerD	Tyrosine recombinase XerD {ECO:0000255	818.82	950.708	697.808	939.466	698.173	943.981	957.435	686.442	709.173
1c0487	1c0487	Hypothetical protein yabE	818.511	136.409	94.9441	442.484	1194.54	135.5	137.318	92.9667	96.9216
1d0366	hemN	Coproporphyrinogen III oxidase and related Fe-S oxidoreductases	807.004	887.032	645.764	566.053	1047.95	387.867	1386.2	682.033	609.494
1c0409	1c0409	hypothetical protein	795.135	82.9925	210.587	739.585	850.686	76.8416	89.1434	216.3	204.873
1c0058	hyaD	Ni,Fe-hydrogenase maturation factor	774.789	107.975	141.329	602.438	947.14	74.8515	141.099	150.917	131.742
1c0551	1c0551	Conserved protein/domain typically associated with flavoprotein oxygenases, DIM6/NTAB family	759.505	144.29	141.763	758.294	760.716	207.649	80.9306	134.343	149.184
1c0697	1c0697	hypothetical protein	757.406	180.172	333.49	226.78	1288.03	252.409	107.935	290.807	376.173
1d0214	1d0214	hypothetical protein	750.124	80.9449	140.471	380.837	1119.41	105.824	56.0658	134.756	146.185
1d0196	lytB	N-acetylmuramoyl-L-alanine amidase cwlB precursor	748.939	93.3598	75.6632	469.193	1028.69	69.1066	117.613	64.8816	86.4448
1c0643	1c0643	hypothetical protein	747.378	84.3364	154.797	393.631	1101.13	75.8236	92.8493	150.401	159.194
1d0581	fixC	Protein CbrA	744.387	271.137	427.507	981.868	506.907	299.499	242.774	413.912	441.102
1d0718	1d0718	Predicted metal-dependent hydrolase of the TIM-barrel fold	742.012	423.487	229.284	1103.82	380.204	414.453	432.521	220.355	238.213
1c0526	lytB	Putative cell wall-binding domain	737.129	453.305	504.742	333.565	1140.69	365.966	540.645	534.343	475.14
1d0657	acrR	Transcriptional regulator	736.183	372.935	443.393	873.518	598.848	359.006	386.864	437.661	449.124
1d0448	1d0448	hypothetical protein	735.432	389.289	344.631	398.481	1072.38	192.672	585.905	358.311	330.951
1d0736	tauC	ABC-type nitrate/sulfonate/bicarbonate transport system, permease component	721.695	220.931	195.266	874.496	568.893	222.786	219.076	182.683	207.849
1c0028	rfaG	Glycosyltransferase	721.486	69.3438	122.1	448.741	994.231	59.206	79.4817	115.882	128.319
1d0508	pyrH	Uridine monophosphate kinase {ECO:0000255	712.055	470.586	497.993	333.04	1091.07	179.661	761.512	528.345	467.641
1d0572	rpoE	DNA-directed RNA polymerase specialized sigma subunit, sigma24 homolog	711.531	681.717	887.06	344.91	1078.15	545.188	818.246	964.226	809.894
1d0028	1d0028	NAD(P)HX epimerase	705.128	252.308	314.724	886.008	524.248	36.1938	468.422	498.787	130.662
1d0492	rpsP	30S ribosomal protein S16 {ECO:0000255	699.491	129.93	140.796	362.17	1036.81	140.766	119.094	167.029	114.562
1c0271	cspC	Cold shock proteins	698.916	387.081	356.339	137.248	1260.58	409.782	364.381	371.292	341.386
1d0466	1d0466	Predicted membrane protein	697.7	118.686	188.192	67.5682	1327.83	131.906	105.466	211.197	165.187
1d0550	1d0550	Transcriptional repressor NrdR {ECO:0000255	697.265	847.168	1136.24	726.585	667.946	572.552	1121.78	1170.57	1101.91
1d0921	rpoE	DNA-directed RNA polymerase specialized sigma subunit, sigma24 homolog	691.61	63.6917	99.4699	342.49	1040.73	58.9947	68.3887	107.052	91.8883
1c0040	1c0040	CRISPR-associated endoribonuclease Cas2 {ECO:0000255	689.774	1212.67	4079.32	0	1379.55	2135.07	290.269	3860.1	4298.53
1c0709	1c0709	hypothetical protein	688.303	88.5177	109.358	354.648	1021.96	135.039	41.9964	116.686	102.03
1d0463	glpX	Fructose-1,6-bisphosphatase/sedoheptulose 1,7-bisphosphatase and related proteins	683.649	113.479	81.5739	202.888	1164.41	129.141	97.8178	83.4956	79.6522
1d0692	1d0692	hypothetical protein	679.274	59.8837	99.0746	182.874	1175.67	63.7249	56.0425	103.278	94.8708
1c0525	purM	Phosphoribosyl-aminoimidazole synthetase {ECO:0000255	677.862	741.782	726.122	558.376	797.348	495.869	987.694	734.866	717.378
1d0302	1d0302	Predicted helicase	673.513	154.948	268.948	337.571	1009.46	209.372	100.523	270.838	267.057
1c0428	folK	7,8-dihydro-6-hydroxymethylpterin-pyrophosphokinase	661.666	330.557	212.473	565.229	758.103	223.404	437.709	231.143	193.804
1c0069	1c0069	Multiheme cytochrome c domain-containing protein	645.973	154.926	156.454	482.734	809.212	175.174	134.678	157.652	155.257
1d0136	hisZ	ATP phosphoribosyltransferase regulatory subunit {ECO:000...	643.734	380.229	159.029	1055.75	231.716	320.066	440.392	166.425	151.633
1c0141	pyrB	Aspartate transcarbamylase {ECO:0000255	643.444	199.468	84.4196	1043.61	243.277	186.27	212.666	71.9437	96.8955
1d0435	aroA	5-enolpyruvylshikimate-3-phosphate synthase {ECO:0000255	641.16	377.73	391.291	484.879	797.44	284.811	470.65	386.209	396.372
1c0665	ahpC	Selenocysteine-containing peroxiredoxin PrxU	639.748	1337.15	1295.41	497.752	781.744	1400.4	1273.89	1334.42	1256.4
1d0132	mhpD	2-keto-4-pentenoate hydratase/2-oxohepta-3-ene-1,7-dioic acid hydratase (catechol pathway)	639.2	144.361	96.8299	612.235	666.165	72.0208	216.702	107.542	86.1174
1c0581	czcD	Co/Zn/Cd efflux system component	634.883	344.024	270.539	593.65	676.116	298.907	389.141	266.272	274.806
1c0475	ompR	Response regulators consisting of a CheY-like receiver domain and a winged-helix DNA-binding domain	620.675	128.008	130.286	504.275	737.075	140.017	115.998	145.83	114.743
1c0449	livK	ABC-type branched-chain amino acid transport systems, periplasmic component	619.292	38.9136	38.488	350.896	887.688	52.6075	25.2198	42.7598	34.2162
1d0584	1d0584	hypothetical protein	617.93	160.251	151.453	495.213	740.647	166.229	154.273	161.542	141.364
1d0212	1d0212	hypothetical protein	613.632	138.41	181.216	450.824	776.44	136.238	140.581	175.22	187.212
1c0013	1c0013	Predicted GTPase	613.168	465.494	504.079	488.956	737.379	377.002	553.986	506.462	501.696
1c0688	1c0688	Ferredoxin II	610.019	171.164	84.8031	325.909	894.128	115.68	226.647	95.3159	74.2904
1d0934	rpsL	30S ribosomal protein S12 {ECO:0000255	608.666	58.3503	14.5617	391.378	825.954	76.0588	40.6417	11.0061	18.1173
1d0687	mgtA	BACCA1	608.382	718.606	731.356	790.572	426.192	539.995	897.217	697.389	765.323
1d0023	rplM	50S ribosomal protein L13 {ECO:0000255	605.273	110.933	126.096	180.221	1030.33	85.739	136.126	130.828	121.365
1d0565	thiJ	Putative intracellular protease/amidase	602.322	210.349	268.647	246.901	957.742	145.167	275.532	294.613	242.682
1c0354	1c0354	hypothetical protein	598.257	123.449	142.949	197.97	998.545	94.183	152.714	131.306	154.591
1c0364	1c0364	Multiheme cytochrome c domain-containing protein	592.748	272.21	380.739	352.029	833.467	254.773	289.646	355.853	405.625
1c0402	1c0402	hypothetical protein	585.332	241.151	177.321	726.82	443.843	182.327	299.975	178.587	176.055
1c0036	add	Probable adenosine deaminase 3	583.202	750.71	621.481	495.213	671.191	797.398	704.022	595.636	647.327
1d0933	rpoC	Transcriptase subunit beta' {ECO:0000255	578.191	109.133	78.1862	689.62	466.763	94.7292	123.536	76.9293	79.4431
1c0230	1c0230	hypothetical protein	577.669	529.97	1153.9	237.564	917.775	358.545	701.395	1181.13	1126.67
1c0288	dcd	Deoxycytidine triphosphate deaminase {ECO:0000255	575.677	298.967	446.103	598.9	552.454	247.589	350.345	470.73	421.477
1c0068	rpsT	30S ribosomal protein S20 {ECO:0000255	573.052	109.658	89.0362	335.563	810.541	110.786	108.53	98.1394	79.9331
1d0525	pnp	Polynucleotide phosphorylase {ECO:0000255	572.826	289.623	326.27	486.032	659.62	252.348	326.897	334.383	318.156
1d0453	1d0453	6-pyruvoyl-tetrahydropterin synthase	571.774	231.015	2086.6	44.4422	1099.11	347.039	114.99	2115.36	2057.84
1c0177	phoU	Phosphate uptake regulator	570.999	538.804	528.655	540.545	601.453	333.645	743.964	539.725	517.585
1d0924	rpmG	50S ribosomal protein L33 {ECO:0000255	565.862	69.9053	72.9259	111.994	1019.73	60.0173	79.7932	70.967	74.8847
1c0031	1c0031	hypothetical protein	565.792	30.525	35.0833	329.395	802.19	40.9782	20.0718	37.1292	33.0374
1d0083	lig	Polydeoxyribonucleotide synthase [NAD(+)] {ECO:0000255	562.859	438.189	299.044	564.059	561.659	374.873	501.505	297.456	300.632
1d0557	1d0557	FOG: GGDEF domain	561.317	129.017	115.671	311.095	811.538	118.046	139.988	122.135	109.207
1d0119	serA	Phosphoglycerate dehydrogenase and related dehydrogenases	560.328	127.028	191.926	346.447	774.21	94.183	159.873	198.768	185.084
1c0006	thrC	Threonine synthase	556.772	2679.18	212.184	243.308	870.235	4620.57	737.797	90.0098	334.359
1c0702	cbiO	ABC-type cobalt transport system, ATPase component	556.471	106.496	129.051	530.631	582.312	78.8569	134.136	130.998	127.104
1d0388	rpoD	RNA polymerase principal sigma factor hrdB	556.352	289.787	326.476	373.314	739.389	245.911	333.664	354.235	298.716
1d0109	rfaG	Glycosyltransferase	555.67	129.448	1035.9	353.932	757.407	144.189	114.708	992.91	1078.9
1d0651	baeS	Signal transduction histidine kinase	554.539	108.779	106.741	447.289	661.79	86.9243	130.634	98.74	114.743
1d0349	1d0349	hypothetical protein	551.869	102.734	158.054	304.546	799.191	49.6384	155.829	151.559	164.549
1d0765	1d0765	hypothetical protein	549.391	54.8036	110.366	224.68	874.102	35.7246	73.8826	114.993	105.74
1c0286	lemA	Uncharacterized conserved protein	549.147	119.57	146.867	622.19	476.104	134.81	104.331	144.2	149.534
1d0925	1d0925	hypothetical protein	541.012	13.9187	39.2994	581.788	500.236	27.8373	0	56.7169	21.8819
1d0044	groL	60 kDa chaperonin 2 (Protein Cpn60 2)	537.942	215.042	423.893	210.853	865.031	172.272	257.811	458.455	389.331
1d0931	rplL	50S ribosomal protein L7/L12 {ECO:0000255	537.623	51.5116	102.376	188.104	887.142	23.2625	79.7607	108.968	95.7827
1d0391	1d0391	hypothetical protein	537.388	67.55	44.8759	277.018	797.759	75.7412	59.3589	36.1683	53.5836
1c0228	1c0228	hypothetical protein	533.342	269.387	475.906	261.108	805.575	181.527	357.248	487.853	463.959
1c0647	1c0647	UPF0272 protein Dhaf_3339 {ECO:0000255	527.765	550.749	586.961	258.593	796.936	611.187	490.311	574.089	599.832
1c0007	1c0007	hypothetical protein	524.565	228.007	404.957	645.45	403.681	228.37	227.644	400.497	409.416
1c0063	1c0063	Predicted hydrolase (HAD superfamily)	523.102	441.529	1143.94	313.709	732.495	644.844	238.215	1069.44	1218.45
1c0048	1c0048	ATP-utilizing enzymes of the PP-loop superfamily	522.994	217.978	269.092	233.321	812.667	159.23	276.726	262.715	275.469
1d0567	1d0567	hypothetical protein	522.223	210.061	178.99	505.781	538.666	273.812	146.31	151.443	206.537
1c0055	1c0055	Uncharacterized protein conserved in bacteria	521.77	44.6889	116.404	146.398	897.143	42.0289	47.3489	89.6454	143.162
1d0263	acs	Acyl-activating enzyme {ECO:0000255	520.557	171.353	265.598	236.489	804.624	125.44	217.267	274.803	256.393
1d0421	deoA	Pyrimidine-nucleoside phosphorylase	518.831	197.258	199.828	658.031	379.631	152.118	242.399	190.876	208.78
1c0091	1c0091	Indolepyruvate ferredoxin oxidoreductase, alpha and beta subunits	516.202	170.353	140.417	695.577	336.827	161.951	178.754	149.306	131.528
1d0074	1d0074	hypothetical protein	515.795	27.2193	61.328	877.448	154.141	29.3125	25.1261	74.653	48.003
1d0547	dapF	Diaminopimelate epimerase {ECO:0000255	512.4	126.816	113.182	474.772	550.027	131.447	122.185	106.993	119.372
1d0524	rpsO	30S ribosomal protein S15 {ECO:0000255	511.227	132.305	404.016	124.438	898.016	161.951	102.658	400.327	407.706
1c0598	1c0598	hypothetical protein	510.056	215.918	254.752	684.681	335.431	222.772	209.065	269.97	239.533
1c0102	gcvH	Glycine cleavage system H protein (lipoate-binding)	509.995	257.148	280.299	376.208	643.782	235.948	278.348	287.761	272.836
1d0440	1d0440	GTP-binding protein EngA {ECO:0000255	509.336	1024.5	978.831	154.121	864.551	933.1	1115.89	987.253	970.409
1c0148	1c0148	hypothetical protein	508.412	544.486	1026.93	90.318	926.505	670.7	418.271	1001.55	1052.31
1d0635	1d0635	HD-GYP domain	506.105	95.4552	108.631	306.367	705.843	97.7268	93.1836	107.438	109.823
1c0646	sufC	ABC-type transport system involved in Fe-S cluster assembly, ATPase component	501.19	1476.48	2852.55	346.754	655.625	933.64	2019.31	3011.62	2693.48
1d0660	1d0660	hypothetical protein	492.074	51.6808	128.397	347.269	636.879	39.8786	63.483	134.888	121.905
1d0745	1d0745	FOG: GGDEF domain	491.377	355.72	403.945	212.006	770.749	335.546	375.894	393.25	414.639
1c0533	1c0533	hypothetical protein	491.255	59.8699	50.4401	694.855	287.655	84.4873	35.2525	55.7854	45.0948
1d0259	coaE	Dephosphocoenzyme A kinase {ECO:0000255	490.625	198.527	158.314	741.138	240.111	189.13	207.924	150.524	166.105
1d0694	dnaA	Chromosomal replication initiator protein DnaA {ECO:00002...	490.53	71.795	164.227	267.231	713.828	94.8523	48.7377	154.238	174.217
1c0370	rfaG	Glycosyltransferase	487.904	142.471	93.8719	740.623	235.184	142.515	142.428	90.3736	97.3702
1d0121	leuC	Isopropylmalate isomerase {ECO:0000255	485.685	141.971	172.83	304.476	666.893	121.616	162.327	172.61	173.049
1c0398	1c0398	Uncharacterized conserved protein	485.376	435.13	237.454	627.827	342.924	438.405	431.855	224.728	250.181
1d0475	1d0475	hypothetical protein	484.986	223.528	248.418	218.171	751.8	192.078	254.978	265.861	230.975
1d0632	nlpD	Membrane proteins related to metalloendopeptidases	484.621	104.946	115.268	255.57	713.673	121.586	88.3055	108.78	121.756
1d0497	rplS	50S ribosomal protein L19 {ECO:0000255	484.425	48.2353	43.7185	130.987	837.862	33.8443	62.6263	43.0974	44.3396
1d0864	1d0864	hypothetical protein	484.261	257.309	325.323	0	968.521	166.532	348.086	328.065	322.58
1d0704	salY	Macrolide export ATP-binding/permease protein MacB {ECO:0...	483.153	372.911	681.344	187.595	778.711	430.849	314.973	1342.46	20.2264
1d0691	1d0691	tRNA m2A37 methyltransferase {ECO:0000255	479.112	351.923	482.5	233.321	724.902	241.764	462.083	482.82	482.179
1d0628	1d0628	hypothetical protein	478.42	296.861	235.382	240.915	715.924	223.249	370.474	240.478	230.285
1c0079	1c0079	hypothetical protein	476.813	81.5934	108.557	152.091	801.535	69.8614	93.3254	117.267	99.8462
1c0634	vicK	Signal transduction histidine kinase	476.223	93.0513	75.3745	524.086	428.36	82.4185	103.684	70.2195	80.5295
1c0621	acyP	Acylphosphate phosphohydrolase	469.829	302.229	457.046	430.747	508.911	221.414	383.044	440.919	473.172
1d0337	1d0337	hypothetical protein	466.958	92.5475	122.892	428.393	505.522	45.6806	139.414	110.746	135.038
1c0295	argH	Arginosuccinase {ECO:0000255	460.603	410.008	282.748	383.488	537.717	254.341	565.675	291.547	273.949
1d0865	1d0865	hypothetical protein	459.829	96.3468	125.333	224.888	694.771	20.66	172.034	126.609	124.056
1c0019	glpC	Fe-S oxidoreductase	457.769	103.163	70.5528	82.285	833.253	59.6791	146.646	73.7789	67.3267
1d0057	1d0057	hypothetical protein	453.215	107.478	225.495	538.576	367.854	122	92.9565	206.061	244.929
1d0300	1d0300	hypothetical protein	451.665	112.109	408.667	182.997	720.334	92.4636	131.754	457.593	359.74
1d0789	1d0789	Iron only hydrogenase large subunit, C-terminal domain	450.303	440.943	602.572	363.458	537.149	307.727	574.159	624.047	581.098
1d0048	guaB	IMP dehydrogenase/GMP reductase	448.993	74.3335	65.6727	410.55	487.435	74.5557	74.1113	65.2707	66.0747
1c0105	1c0105	ACT domain-containing protein	448.525	35.3879	63.4462	308.95	588.099	62.0869	8.68892	54.59	72.3025
1d0658	1d0658	hypothetical protein	447.895	149.285	135.696	41.4794	854.311	149.249	149.321	146.584	124.808
1c0472	atpE	V-type sodium ATP synthase subunit K	447.166	250.258	353.151	234.789	659.544	194.126	306.389	342.475	363.827
1d0383	ppsA	Phosphoenolpyruvate synthase/pyruvate phosphate dikinase	446.421	194.61	152.07	402.916	489.925	136.918	252.302	145.794	158.346
1c0005	gltB	Glutamate synthase domain 2	446.116	63.2424	94.8935	54.8991	837.333	44.5507	81.9342	101.687	88.0996
1c0441	hflB	ATP-dependent zinc metalloprotease FtsH 1 {ECO:0000255	445.879	152.022	312.184	362.632	529.126	115.567	188.478	310.563	313.805
1c0567	acd	D-cysteine desulfhydrase {ECO:0000255	445.493	409.953	450.121	309.347	581.638	378.119	441.788	503.731	396.51
1d0724	1d0724	hypothetical protein	445.071	542.623	1371.24	229.496	660.646	467.348	617.898	1307.7	1434.78
1d0213	1d0213	HD-GYP domain	442.062	20.3633	63.1101	17.4039	866.721	28.9794	11.7473	60.7616	65.4586
1d0637	mgtA	Cation transport ATPase	441.862	222.663	187.346	475.447	408.277	211.82	233.506	199.402	175.29
1d0233	trpA	Tryptophan synthase alpha chain {ECO:0000255	441.816	282.515	182.645	352.575	531.058	249.278	315.751	190.56	174.731
1c0568	1c0568	hypothetical protein	438.833	108.888	270.34	295.694	581.973	76.4011	141.374	260.789	279.891
1d0646	hisM	ABC-type amino acid transport system, permease component	438.541	80.3643	199.833	211.151	665.931	100.869	59.8592	189.583	210.084
1c0020	narI	Nitrate reductase gamma subunit	438.006	80.0074	129.974	23.1393	852.873	60.2299	99.7849	126.888	133.06
1d0137	hisG	ATP phosphoribosyltransferase {ECO:0000255	436.568	211.214	102.667	699.964	173.171	168.699	253.728	100.461	104.873
1c0538	1c0538	Uncharacterized metal-binding protein	436.181	469.815	499.891	237.386	634.975	386.871	552.758	493.593	506.189
1c0200	1c0200	ABC-type uncharacterized transport systems, ATPase components	435.602	393.07	396.731	392.016	479.188	279.189	506.951	398.118	395.345
1c0383	1c0383	Predicted Fe-S oxidoreductases	435.065	56.4908	52.5036	151.476	718.654	68.4565	44.525	55.0187	49.9885
1c0308	baeS	Signal transduction histidine kinase	433.537	201.219	103.428	696.287	170.788	277.038	125.401	89.151	117.704
1d0225	prc	Periplasmic protease	432.819	427.313	355.438	229.411	636.228	347.267	507.359	328.608	382.268
1d0713	1d0713	hypothetical protein	432.026	155.423	253.322	215.374	648.678	94.8076	216.039	206.025	300.619
1d0208	hisJ	ABC-type amino acid transport/signal transduction systems, periplasmic component/domain	429.957	27.1069	35.7836	218.839	641.074	31.0434	23.1704	36.7071	34.8601
1c0359	1c0359	Redox-sensing transcriptional repressor Rex {ECO:0000255	427.842	76.8125	93.8058	254.532	601.151	91.5848	62.0402	104.217	83.3943
1c0197	1c0197	hypothetical protein	426.685	234.295	640.085	180.636	672.734	281.187	187.403	650.091	630.078
1c0632	ompR	Response regulators consisting of a CheY-like receiver domain and a winged-helix DNA-binding domain	426.213	60.9515	78.9971	236.432	615.994	74.3071	47.596	71.8769	86.1174
1c0630	1c0630	Multiheme cytochrome c domain-containing protein	424.908	69.0257	95.9554	289.953	559.864	96.7685	41.2829	101.031	90.8795
1c0238	1c0238	hypothetical protein	424.445	165.695	181.418	355.131	493.758	92.003	239.386	194.43	168.405
1d0589	1d0589	hypothetical protein	423.689	60.7044	113.15	28.7165	818.662	92.3343	29.0745	142.774	83.5252
1d0507	tsf	Elongation factor Ts {ECO:0000255	423.435	146.497	139.418	192.238	654.631	102.545	190.449	155.065	123.771
1c0224	1c0224	hypothetical protein	420.752	111.748	87.2951	167.991	673.512	96.4564	127.039	96.8973	77.6929
1c0176	1c0176	Predicted enzyme with a TIM-barrel fold	419.729	59.4896	76.8449	581.102	258.356	54.598	64.3813	83.0438	70.6459
1d0786	ompR	Response regulator ArlR	417.887	367.363	284.564	222.997	612.776	400.242	334.485	271.742	297.385
1c0216	1c0216	hypothetical protein	417.404	142.364	190.613	360.215	474.593	142.898	141.83	162.812	218.414
1d0261	uvrB	Excinuclease ABC subunit B {ECO:0000255	417.196	171.171	250.186	184.219	650.173	199.104	143.239	261.264	239.109
1d0753	cumB	Cytosine/adenosine deaminases	410.793	107.357	65.9856	475.559	346.027	101.03	113.685	65.1951	66.7762
1c0171	1c0171	UPF0235 protein Swol_0959 {ECO:0000255	410.739	122.86	121.499	456.714	364.765	109.454	136.265	85.6599	157.338
1d0705	1d0705	Uncharacterized conserved protein	410.314	74.434	82.1879	240.392	580.236	45.4677	103.4	103.39	60.9856
1c0023	arsR	Predicted transcriptional regulators	401.584	641.165	818.193	144.82	658.349	923.912	358.418	829.439	806.947
1d0597	thiF	Dinucleotide-utilizing enzymes involved in molybdopterin and thiamine biosynthesis family 2	401.282	84.172	82.0488	257.458	545.105	88.6955	79.6484	82.0195	82.078
1c0183	ftsZ	Cell division protein ftsZ	400.826	37.5108	66.0352	191.842	609.81	75.0216	0	72.7867	59.2837
1d0467	thi80	Thiamine pyrophosphokinase	399.106	28.5231	30.5716	50.6761	747.535	48.4949	8.55131	31.4942	29.6489
1c0648	1c0648	NCAIR mutase (PurE)-related proteins	398.619	394.115	380.059	166.4	630.838	378.847	409.384	332.724	427.394
1d0017	rpoA	Transcriptase subunit alpha {ECO:0000255	395.351	46.177	30.7617	226.612	564.091	54.7853	37.5687	34.0098	27.5135
1d0158	cheW	Chemotaxis signal transduction protein	394.077	71.3933	280.652	422.814	365.34	118.424	24.3626	298.586	262.717
1d0060	ppx1	Pyrophosphate phospho-hydrolase {ECO:0000250	394.076	191.858	282.553	454.589	333.562	179.546	204.171	287.051	278.054
1d0877	moaB	Molybdopterin biosynthesis enzymes	392.56	331.156	281.258	279.986	505.134	171.478	490.833	284.039	278.477
1c0233	pulF	Type II secretory pathway, component PulF	389.587	314.177	318.797	244.267	534.906	354.6	273.755	331.584	306.01
1d0317	baeS	Signal transduction histidine kinase	389.584	256.028	185.972	418.717	360.45	258.376	253.681	178.155	193.789
1d0639	1d0639	hypothetical protein	388.267	428.075	863.631	133.327	643.207	632.836	223.314	837.264	889.999
1c0499	1c0499	hypothetical protein	387.648	439.256	259.651	521.542	253.754	378.26	500.252	250.873	268.429
1d0363	holA	DNA polymerase III, delta subunit	386.784	26.7857	56.2834	145.738	627.829	29.6096	23.9619	54.0982	58.4685
1c0706	1c0706	hypothetical protein	386.287	182.516	301.124	259.246	513.329	166.715	198.316	282.428	319.82
1d0321	1d0321	Predicted heme/steroid binding protein	385.34	623.714	415.119	196.481	574.199	744.576	502.852	423.791	406.446
1d0222	1d0222	Transketolase, C-terminal subunit	384.963	146.999	125.819	518.823	251.102	238.316	55.6822	135.603	116.035
1d0262	aarF	Predicted unusual protein kinase	384.036	122.362	123.686	367.596	400.475	149.152	95.5717	133.489	113.884
1d0350	rplU	Ribosomal protein L21	382.865	286.237	221.007	0	765.731	243.313	329.161	233.299	208.716
1c0597	1c0597	hypothetical protein	382.426	305.97	293.547	281.747	483.105	283.1	328.84	311.575	275.519
1d0698	gyrB	Type IIA topoisomerase (DNA gyrase/topo II, topoisomerase IV), B subunit	381.934	193	342.795	342.302	421.567	206.956	179.044	336.696	348.895
1d0116	ilvH	Acetolactate synthase, small (regulatory) subunit	381.874	39.9339	47.3481	183.222	580.525	63.1207	16.747	41.8635	52.8328
1d0928	rplA	50S ribosomal protein L1 {ECO:0000255	381.733	42.237	50.93	182.686	580.781	67.4967	16.9773	45.2981	56.5618
1c0172	divIVA	Cell division initiation protein	381.616	166.249	168.206	329.395	433.837	140.272	192.226	172.601	163.81
1d0464	1d0464	Probable serine/threonine-protein kinase SCO3848	381.506	550.129	302	297.191	465.821	513.716	586.542	285.53	318.469
1d0295	nfnB	Nitroreductase	381.215	125.053	122.623	205.225	557.204	80.8012	169.305	162.913	82.3339
1c0645	sufB	ABC-type transport system involved in Fe-S cluster assembly, permease component	380.465	98.3189	240.562	145.619	615.31	76.0098	120.628	221.328	259.795
1d0115	ilvB	Thiamine pyrophosphate-requiring enzymes	378.231	38.0847	33.9674	131.197	625.266	50.6764	25.493	32.0477	35.8872
1d0551	nrdD	Oxygen-sensitive ribonucleoside-triphosphate reductase	378.019	293.987	327.713	396.255	359.783	214.348	373.627	331.467	323.96
1c0601	1c0601	Prismane protein {ECO:0000255	377.747	192.129	498.862	229.048	526.446	97.3593	286.899	507.407	490.316
1c0231	1c0231	hypothetical protein	376.11	489.857	751.412	388.869	363.35	491.213	488.5	724.076	778.749
1c0277	ruvB	Holliday junction ATP-dependent DNA helicase RuvB {ECO:00...	374.496	103.809	92.5481	471.946	277.046	88.9055	118.712	87.2355	97.8607
1d0939	rplC	50S ribosomal protein L3 {ECO:0000255	371.103	147.395	81.7944	482.272	259.934	118.968	175.822	65.9521	97.6367
1c0343	fumA	Tartrate dehydratase beta subunit/Fumarate hydratase class I, C-terminal domain	370.679	246.616	247.601	202.888	538.471	179.4	313.832	266.275	228.927
1c0218	1c0218	Pyruvate/oxaloacetate carboxyltransferase	370.478	336.74	347.268	334.49	406.467	372.45	301.03	330.597	363.94
1d0301	1d0301	hypothetical protein	367.896	269.404	194.548	105.655	630.138	323.543	215.265	185.4	203.696
1c0515	1c0515	Predicted transcriptional regulator	365.142	875.104	1077.83	67.1428	663.14	487.294	1262.91	1132.06	1023.6
1c0045	proP	Permeases of the major facilitator superfamily	364.756	897.275	789.131	98.4874	631.024	864.93	929.619	819.536	758.725
1d0653	fabG	Putative oxidoreductase SadH	364.27	114.465	138.582	103.316	625.224	93.3321	135.597	168.705	108.458
1d0930	rplJ	50S ribosomal protein L10 {ECO:0000255	363.702	14.4658	34.4563	0	727.403	14.6146	14.317	26.3645	42.5481
1d0904	pnp	Purine nucleoside phosphorylase {ECO:0000255	363.338	223.895	263.509	126.786	599.891	160.154	287.636	245.14	281.877
1d0680	crp	cAMP-binding proteins	362.746	44.2479	68.4042	222.4	503.091	45.6059	42.89	62.7205	74.088
1d0493	1d0493	Predicted RNA-binding protein (contains KH domain)	361.4	48.1195	54.2513	332.403	390.398	64.5979	31.6411	39.26	69.2427
1d0318	1d0318	hypothetical protein	360.943	828.819	1571.62	217.043	504.843	947.117	710.521	1610.72	1532.52
1d0741	hemN	Coproporphyrinogen III oxidase and related Fe-S oxidoreductases	360.373	37.0016	100.72	322.98	397.765	42.3878	31.6153	97.526	103.913
1d0090	mnhE	Multisubunit Na+/H+ antiporter, MnhE subunit	360.183	105.263	65.0053	233.321	487.044	91.0977	119.427	56.296	73.7146
1c0479	pth	Peptidyl-tRNA hydrolase {ECO:0000255	360.107	57.3779	45.3014	138.265	581.949	70.3151	44.4407	44.0475	46.5553
1d0634	1d0634	hypothetical protein	360.065	295.218	322.66	211.424	508.705	262.212	328.225	336.329	308.99
1c0339	nuoA	NUO1 {ECO:0000255	359.968	71.6832	218.312	264.137	455.799	133.462	9.90482	231.75	204.873
1d0202	pnp	Purine nucleoside phosphorylase	359.719	285.437	286.379	187.407	532.032	163.558	407.315	311.865	260.893
1c0605	ddlA	D-alanylalanine synthetase {ECO:0000255	358.543	207.629	227.945	276.084	441.002	199.874	215.384	201.86	254.03
1d0828	pykF	Pyruvate kinase	355.425	236.802	268.988	0	710.85	207.826	265.779	244.437	293.539
1c0017	acuC	Deacetylases, including yeast histone deacetylase and acetoin utilization protein	355.153	182.784	310.006	151.344	558.962	208.554	157.014	329.917	290.094
1d0291	zntA	Cation transport ATPase	353.72	325.652	230.233	306.452	400.989	330.586	320.719	222.027	238.439
1c0450	nirD	Ferredoxin subunits of nitrite reductase and ring-hydroxylating dioxygenases	352.162	138.882	403.537	269.055	435.268	123.588	154.176	408.196	398.879
1c0012	arcC	Carbamate kinase	351.38	197.075	196.38	240.659	462.101	159.076	235.074	196.129	196.631
1c0009	1c0009	Hypothetical signaling protein PA1727	350.77	76.3968	81.92	335.026	366.514	100.029	52.7647	82.235	81.6051
1d0365	lepA	Ribosomal back-translocase LepA {ECO:0000255	349.189	1.06093	145.145	697.639	0.739696	1.42424	0.697615	0.453406	289.836
1d0695	dnaN	DNA polymerase sliding clamp subunit (PCNA homolog)	348.909	47.2354	68.624	214.197	483.622	46.8519	47.6189	69.7291	67.519
1c0144	1c0144	hypothetical protein	348.342	223.96	275.17	77.7738	618.91	267.934	179.985	237.207	313.134
1d0549	hflX	GTPases	348.339	73.0505	102.43	143.582	553.095	82.4414	63.6597	104.055	100.806
1c0307	infC	Translation initiation factor IF-3	345.669	105.246	77.951	92.9063	598.431	118.328	92.1641	79.6619	76.2401
1c0038	1c0038	HD-GYP domain	345.25	104.686	56.1566	482.232	208.268	130.804	78.5679	48.9365	63.3768
1c0561	1c0561	Predicted ATPase (AAA+ superfamily)	345.245	99.216	111.981	155.057	535.434	94.2137	104.218	102.894	121.068
1c0211	1c0211	Probable inorganic polyphosphate/ATP-NAD kinase	345.029	214.075	268.761	277.018	413.041	183.294	244.856	257.036	280.487
1c0276	lytB	Putative cell wall-binding domain	344.554	141.242	161.446	117.516	571.592	131.543	150.941	152.158	170.733
1c0076	rpmB	50S ribosomal protein L28 {ECO:0000255	344.429	85.9629	64.2516	148.141	540.718	95.2656	76.6602	77.9858	50.5174
1c0204	ald	Alanine dehydrogenase	343.298	46.529	56.4013	246.819	439.777	53.144	39.914	58.6504	54.1521
1c0460	1c0460	hypothetical protein	341.988	27.2859	41.7022	198.323	485.652	37.5108	17.061	49.4722	33.9321
1c0018	1c0018	hypothetical protein	341.693	32.515	57.3897	235.282	448.104	30.6211	34.4088	63.6501	51.1293
1d0616	1d0616	hypothetical protein	341.481	167.923	125.043	338.652	344.309	139.086	196.76	120.016	130.069
1d0889	spr	Cell wall-associated hydrolases (invasion-associated proteins)	341.467	27.0624	133.445	82.836	600.097	34.2449	19.88	137.283	129.608
1d0868	tupA	Tungstate uptake system permease protein TupB {ECO:000030...	340.809	198.285	101.734	455.891	225.727	229.164	167.405	109.432	94.0372
1d0674	1d0674	hypothetical protein	338.09	101.536	106.33	279.351	396.829	128.317	74.7556	89.1266	123.534
1c0699	1c0699	Predicted membrane protein	337.961	230.466	215.885	258.674	417.247	209.284	251.648	212.127	219.642
1d0947	rpmC	50S ribosomal protein L29 {ECO:0000255	336.142	49.7209	40.5626	26.2897	645.994	90.5694	8.87249	44.2102	36.915
1d0173	sua5	Putative translation factor (SUA5)	335.639	91.8447	212.547	95.499	575.78	99.6965	83.9929	205.665	219.43
1c0260	1c0260	Multiheme cytochrome c domain-containing protein	333.226	43.5704	93.6402	198.911	467.541	50.5787	36.5621	98.0387	89.2417
1d0895	mrcB	Membrane carboxypeptidase (penicillin-binding protein)	333.065	241.243	159.529	311.095	355.034	221.428	261.059	145.901	173.157
1d0902	1d0902	Uncharacterized conserved protein	331.983	201.87	420.024	198.28	465.686	185.297	218.443	422.423	417.626
1d0554	1d0554	hypothetical protein	330.482	46.9102	66.8114	219.597	441.368	57.9999	35.8205	73.0543	60.5685
1d0545	ammECR1	Hypothetical protein TTE1956	330.056	225.951	577.834	159.641	500.471	188.964	262.938	603.064	552.603
1d0071	lytB	Putative cell wall-binding domain	329.995	85.8029	108.922	201.636	458.354	88.6499	82.9559	114.993	102.851
1d0112	leuD	3-isopropylmalate dehydratase small subunit	329.469	145.297	138.557	266.653	392.286	153.105	137.488	147.848	129.265
1d0102	pncB	Nicotinic acid phosphoribosyltransferase	327.291	412.404	269.217	256.966	397.617	341.808	482.999	277.125	261.309
1d0015	rpsK	30S ribosomal protein S11 {ECO:0000255	326.871	197.866	231.007	125.367	528.375	195.152	200.58	196.565	265.449
1d0073	napF	Ferredoxin	326.705	67.2902	100.663	398.019	255.391	88.2607	46.3196	95.3318	105.995
1c0451	grxC	Glutaredoxin and related proteins	326.221	360.484	819.8	66.6633	585.778	296.004	424.964	895.211	744.389
1d0737	1d0737	Predicted phosphoribosyltransferases	323.791	266.065	403.248	148.975	498.607	328.062	204.067	424.162	382.334
1d0131	leuA	Citramalate synthase {ECO:0000303	323.224	68.8617	67.0892	298.084	348.365	58.6807	79.0427	67.9781	66.2003
1d0527	dapB	4-hydroxy-tetrahydrodipicolinate reductase {ECO:0000255	321.476	170.133	124.572	245.982	396.97	122.959	217.307	135.946	113.198
1d0092	mnhG	Multisubunit Na+/H+ antiporter, MnhG subunit	319.28	114.285	92.8102	183.324	455.237	84.208	144.363	98.7007	86.9197
1d0384	1d0384	hypothetical protein	316.423	433.506	409.88	135.477	497.368	248.92	618.093	446.846	372.914
1c0572	1c0572	MutL protein	316.133	283.537	178.325	390.774	241.492	242.513	324.56	179.029	177.622
1c0686	trxB	Thioredoxin reductase	315.936	200.25	279.433	270.859	361.014	150.111	250.389	306.1	252.765
1d0542	spoVS	Uncharacterized protein conserved in bacteria	315.258	210.312	159	81.1553	549.361	144.452	276.172	157.243	160.758
1c0289	nrdA	Ribonucleotide reductase, alpha subunit	314.639	298.215	319.139	327.846	301.432	244.576	351.855	330.34	307.939
1c0655	gltA	Citrate synthase	314.23	104.454	111.968	112.219	516.241	112.543	96.3646	112.134	111.802
1c0135	pyrD	Orotate reductase (NADH)	313.639	98.0285	100.985	494.969	132.309	106.831	89.2256	79.3561	122.615
1d0505	ompR	Response regulators consisting of a CheY-like receiver domain and a winged-helix DNA-binding domain	313.12	94.4091	105.462	180.943	445.297	118.11	70.7083	113.497	97.4265
1d0201	lytB	Putative cell wall-binding domain	312.918	101.329	117.414	377.818	248.017	110.334	92.3246	117.632	117.196
1d0739	1d0739	Predicted membrane protein	312.746	1271.47	1853.24	109.798	515.693	1440.54	1102.41	1823.35	1883.13
1d0896	dnaJ	Chaperone protein DnaJ 1 {ECO:0000255	303.806	115.195	175.531	252.765	354.846	142.898	87.4926	167.751	183.311
1d0134	1d0134	Uncharacterized protein conserved in bacteria	302.964	39.4956	40.3339	266.653	339.274	48.9937	29.9975	46.7915	33.8764
1c0229	1c0229	hypothetical protein	302.825	181.668	636.26	0	605.65	157.706	205.63	618.734	653.786
1c0116	1c0116	hypothetical protein	301.014	200.267	192.967	87.9536	514.073	179.558	220.976	195.781	190.152
1d0422	pcnB	tRNA nucleotidyltransferase/poly(A) polymerase	299.071	176.193	117.389	410.235	187.906	171.478	180.908	105.581	129.197
1c0401	1c0401	Multiheme cytochrome c domain-containing protein	297.348	138.859	137.429	189.362	405.335	130.472	147.245	132.519	142.339
1d0139	hisC	Imidazole acetol-phosphate transaminase {ECO:0000255	296.536	118.904	176.993	253.179	339.894	104.893	132.914	182.209	171.777
1c0304	pheS	Phenylalanyl-tRNA synthetase alpha chain	296.352	82.4364	88.3355	73.8192	518.884	85.9812	78.8916	76.719	99.952
1c0173	1c0173	Predicted integral membrane protein	295.658	42.7626	68.5514	293.618	297.699	28.9008	56.6244	78.2048	58.8981
1d0130	ilvE	Branched-chain amino acid aminotransferase/4-amino-4-deoxychorismate lyase	294.018	82.373	84.5269	304.995	283.04	70.0482	94.6978	83.4014	85.6524
1d0650	mscS	Small-conductance mechanosensitive channel	293.743	199.632	202.347	311.095	276.391	198.333	200.931	186.281	218.414
1d0502	gid	Folate-dependent tRNA(M-5-U54)-methyltransferase {ECO:000...	293.197	188.18	227.173	307.721	278.673	229.691	146.669	217.59	236.756
1c0301	argJ	Arginine biosynthesis bifunctional protein ArgJ beta chai...	291.989	153.238	98.3224	336.893	247.086	110.833	195.642	92.5368	104.108
1c0671	modF	ABC-type molybdenum transport system, ATPase component/photorepair protein PhrA	291.538	23.8771	75.2928	339.377	243.699	20.2656	27.4886	83.8701	66.7154
1c0287	nth	Predicted EndoIII-related endonuclease	291.423	119.268	53.3043	414.794	168.053	137.971	100.566	52.8122	53.7965
1c0032	1c0032	hypothetical protein	291.108	98.3877	82.975	142.936	439.28	94.6219	102.153	86.6801	79.2698
1d0607	pnp	Purine nucleoside phosphorylase	289.155	138.973	114.493	292.049	286.262	145.815	132.132	113.729	115.256
1d0513	1d0513	Regulating anti-sigma-W factor activity protease	288.392	155.159	329.509	193.871	382.913	144.969	165.348	347.451	311.567
1d0117	ilvC	Alpha-keto-beta-hydroxylacyl reductoisomerase {ECO:000025...	288.049	24.6228	25.9908	61.4739	514.625	41.0726	8.17296	24.5165	27.4652
1c0684	1c0684	hypothetical protein	287.252	84.4929	84.2407	169.688	404.816	77.9446	91.0412	82.0759	86.4054
1d0664	lysR	Transcriptional regulator	287.097	63.4169	61.0998	307.157	267.037	61.0483	65.7855	66.51	55.6896
1d0093	mnhB	Multisubunit Na+/H+ antiporter, MnhB subunit	287.021	66.8029	71.4789	65.879	508.163	10.0869	123.519	83.4906	59.4673
1d0444	ribD	Riboflavin biosynthesis protein ribD	286.722	53.0095	90.63	347.745	225.699	64.5979	41.4211	86.3719	94.8881
1c0396	1c0396	hypothetical protein	286.445	115.189	93.0511	44.2315	528.658	121.904	108.474	76.9694	109.133
1d0003	rpsH	30S ribosomal protein S8 {ECO:0000255	286.124	66.4069	30.948	140.344	431.905	87.0283	45.7856	37.9667	23.9293
1d0906	1d0906	Redox-sensing transcriptional repressor Rex {ECO:0000255	286.079	251.51	129.582	267.778	304.38	162.796	340.224	120.927	138.237
1d0434	tyrA	Prephenate dehydrogenase	284.53	334.835	259.832	200.168	368.892	264.343	405.327	254.656	265.007
1c0138	uspA	Universal stress protein UspA and related nucleotide-binding proteins	284.215	156.119	153.275	258.143	310.287	121.616	190.622	137.927	168.623
1d0707	pspE	Rhodanese-related sulfurtransferase	283.507	177.345	106.267	311.095	255.918	172.464	182.226	120.004	92.5299
1d0555	1d0555	Permeases	283.172	40.707	58.2378	197.682	368.663	49.767	31.647	63.0954	53.3801
1d0910	clpA	ATP-dependent Clp protease ATP-binding subunit ClpC1	282.231	252.667	575.205	0	564.461	174.094	331.239	583.062	567.348
1c0512	trmU	Probable tRNA (5-methylaminomethyl-2-thiouridylate)-methyltransferase1	281.792	78.6051	137.747	297.801	265.783	52.5182	104.692	138.419	137.075
1d0167	1d0167	hypothetical protein	281.039	24.5743	41.366	0	562.079	37.826	11.3226	58.8716	23.8603
1d0703	salX	ABC-type antimicrobial peptide transport system, ATPase component	280.657	185.297	290.334	198.415	362.9	214.348	156.247	285.845	294.822
1d0346	1d0346	Fe-S oxidoreductase	278.229	221.639	227.127	157.608	398.851	188.796	254.482	241.317	212.938
1c0465	1c0465	Uncharacterized conserved protein	278.052	109.109	227.427	169.688	386.415	148.803	69.4156	228.962	225.892
1d0800	lon	ATP-dependent protease La {ECO:0000255	277.748	48.4233	103.297	80.9541	474.542	53.6533	43.1934	108.233	98.3615
1c0687	1c0687	Predicted ATPase related to phosphate starvation-inducible protein PhoH	277.511	182.528	191.313	219.884	335.139	164.969	200.088	191.494	191.132
1d0546	miaA	Isopentenyl-diphosphate:tRNA isopentenyltransferase {ECO:...	276.317	112.897	220.979	118.066	434.567	0	225.794	249.108	192.851
1d0688	baeS	Phosphate regulon sensor protein phoR	275.016	158.285	121.584	226.626	323.406	135.328	181.243	134.065	109.104
1d0591	mdlB	Lipid A export ATP-binding/permease protein msbA	274.219	39.4046	51.1597	137.728	410.711	45.783	33.0263	44.52	57.7993
1d0913	1d0913	Integral membrane protein (PIN domain superfamily)	273.967	121.764	110.198	183.952	363.982	123.017	120.511	119.465	100.932
1c0413	1c0413	Multiheme cytochrome c domain-containing protein	273.109	29.142	37.9896	148.785	397.433	47.6328	10.6513	38.8987	37.0806
1c0516	1c0516	Uncharacterized conserved protein	273.021	320.984	616.491	129.541	416.5	265.061	376.908	604.021	628.961
1c0469	ntpA	V-ATPase subunit A {ECO:0000255	271.379	33.3115	69.919	165.709	377.048	7.18082	59.4422	63.3226	76.5153
1d0721	1d0721	HD-GYP domain	270.085	52.016	50.568	157.492	382.677	49.5679	54.4641	58.4284	42.7077
1d0673	1d0673	Magnesium-protoporphyrin IX monomethyl ester [oxidative] cyclase	269.988	59.4881	114.745	186.277	353.698	67.2292	51.7471	113.961	115.53
1c0368	1c0368	hypothetical protein	269.828	95.6146	123.242	222.211	317.446	104.472	86.7573	117.743	128.741
1d0126	1d0126	Multiheme cytochrome c domain-containing protein	269.584	94.0914	66.7279	165.672	373.496	88.783	99.3998	73.0828	60.373
1d0929	1d0929	hypothetical protein	268.429	12.9006	28.1732	114.28	422.578	4.37444	21.4268	33.4225	22.9239
1c0517	1c0517	hypothetical protein	267.743	24.4324	23.802	96.7852	438.7	31.7552	17.1097	32.3496	15.2543
1d0950	rplX	50S ribosomal protein L24 {ECO:0000255	267.691	25.0991	36.7319	326.65	208.733	16.0761	34.1221	29.001	44.4628
1d0711	1d0711	Predicted membrane protein, hemolysin III homolog	266.791	65.016	93.2152	143.846	389.737	66.0741	63.9579	92.6528	93.7776
1d0097	hyfB	Formate hydrogenlyase subunit 3/Multisubunit Na+/H+ antiporter, MnhD subunit	266.24	31.7961	67.4295	125.197	407.284	0	63.5922	67.128	67.7311
1c0318	1c0318	Cyclic 2,3-diphosphoglycerate synthetase {ECO:0000255	265.201	188.144	124.126	238.019	292.382	185.097	191.192	116.324	131.928
1c0241	aroE	Shikimate 5-dehydrogenase	264.84	75.0278	84.5914	325.71	203.97	67.613	82.4427	80.6027	88.58
1d0594	baeS	Signal transduction histidine kinase	264.76	148.972	121.701	243.466	286.055	150.043	147.9	136.772	106.629
1d0880	tar	Methyl-accepting chemotaxis protein	264.631	137.559	198.604	102.559	426.702	275.119	0	208.762	188.446
1d0128	leuD	3-isopropylmalate dehydratase small subunit	264.465	39.0807	60.0945	303.599	225.331	49.0675	29.0939	55.9054	64.2835
1c0265	secD	Protein translocase subunit SecD {ECO:0000255	263.342	121.049	143.181	257.458	269.226	107.42	134.678	136.161	150.2
1c0379	1c0379	hypothetical protein	263.009	407.154	555.731	215.967	310.052	531.44	282.869	570.714	540.748
1d0726	1d0726	hypothetical protein	262.81	55.062	310.322	60.212	465.407	85.739	24.385	299.365	321.279
1d0927	rplK	50S ribosomal protein L11 {ECO:0000255	262.631	23.351	53.759	0	525.263	42.2657	4.43624	54.7822	52.7357
1d0156	pulE	General secretion pathway protein E (Type II traffic warden ATPase)(Pectic enzymes secretion protein outE)	262.038	140.082	127.883	190.772	333.304	119.416	160.748	130.458	125.308
1d0009	secY	Preprotein translocase secY subunit	261.692	16.8156	30.7597	119.143	404.241	18.2423	15.3888	34.5221	26.9974
1c0115	1c0115	hypothetical protein	261.44	38.7327	39.3035	174.991	347.888	44.6557	32.8097	29.8539	48.7531
1d0662	1d0662	Micrococcal nuclease (thermonuclease) homologs	261.01	144.278	144.421	184.896	337.124	113.24	175.315	135.188	153.655
1c0143	1c0143	hypothetical protein	260.7	130.819	135.502	118.512	402.888	163.312	98.325	134.309	136.694
1c0471	ntpC	Archaeal/vacuolar-type H+-ATPase subunit C	260.054	24.21	88.5478	63.9967	456.112	20.8223	27.5977	81.885	95.2105
1d0568	1d0568	hypothetical protein	259.874	134.309	395.517	149.992	369.756	117.381	151.237	406.582	384.453
1c0235	pulE	Type II secretory pathway, ATPase PulE/Tfp pilus assembly pathway, ATPase PilB	259.618	98.4109	125.606	154.429	364.807	114.113	82.7088	127.639	123.573
1c0663	sppA	Periplasmic serine proteases (ClpP class)	259.363	167.18	322.686	181.94	336.786	151.668	182.692	336.507	308.866
1d0560	arsR	Cadmium efflux system accessory protein (Cadmium resistance regulatoryprotein)	259.21	94.877	91.4844	122.398	396.022	105.417	84.3371	93.9664	89.0023
1d0647	mmt1	Predicted Co/Zn/Cd cation transporters	258.871	181.654	168.261	135.858	381.885	154.656	208.653	189.597	146.926
1c0569	1c0569	hypothetical protein	257.985	89.0513	184.913	118.89	397.08	76.4552	101.647	211.232	158.593
1d0509	frr	Ribosome-releasing factor {ECO:0000255	257.961	40.4528	57.3109	0	515.922	36.877	44.0285	65.3026	49.3192
1d0914	ispD	MEP cytidylyltransferase {ECO:0000255	257.944	66.4046	132.335	295.142	220.746	0	132.809	123.061	141.609
1c0066	lcb5	Sphingosine kinase and enzymes related to eukaryotic diacylglycerol kinase	257.226	147.951	155.194	65.5983	448.854	167.095	128.807	146.504	163.885
1c0427	panB	Ketopantoate hydroxymethyltransferase {ECO:0000255	257.12	60.5489	95.8266	208.097	306.142	59.3801	61.7177	103.739	87.9136
1d0891	pilT	Tfp pilus assembly protein, pilus retraction ATPase PilT	255.32	50.878	96.1364	0	510.64	37.2778	64.4782	106.807	85.4662
1c0623	uspA	Universal stress protein UspA and related nucleotide-binding proteins	255.033	69.324	244.523	86.4153	423.651	77.4033	61.2448	225.563	263.483
1c0589	ssb	Single-stranded DNA-binding protein	254.684	446.91	440.786	219.597	289.771	447.608	446.212	457.593	423.979
1c0264	secF	Protein-export membrane protein secF	254.066	114.939	82.1386	144.976	363.155	209.492	20.3866	154.583	9.69381
1d0454	troR	Mn-dependent transcriptional regulator	253.216	126.901	121.885	327.911	178.52	108.139	145.663	122.336	121.435
1d0248	1d0248	Predicted acetamidase/formamidase	252.737	31.537	39.2628	167.433	338.041	48.424	14.6499	43.0735	35.4521
1c0628	mgtE	Mg/Co/Ni transporter MgtE (contains CBS domain)	252.055	213.688	125.375	197.924	306.187	212.599	214.778	124.008	126.742
1d0556	uraA	Xanthine/uracil permeases	251.768	37.4502	63.6066	107.607	395.929	42.7744	32.1259	65.3628	61.8504
1d0254	ompR	Transcriptional regulatory protein glnR	251.568	63.0957	100.014	168.16	334.976	65.656	60.5354	103.893	96.1357
1c0640	1c0640	FOG: FHA domain	250.467	124.176	109.075	183.829	317.106	165.632	82.7202	107.526	110.625
1d0369	1d0369	Uncharacterized protein conserved in bacteria	250.115	184.977	158.272	258.221	242.009	111.833	258.12	159.67	156.873
1c0614	1c0614	Putative membrane protein insertion efficiency factor {EC...	249.776	55.4515	111.337	157.738	341.813	72.4555	38.4474	96.1092	126.566
1d0806	dnaK	Heat shock protein 70 {ECO:0000255	249.308	2117.8	3191.3	124.241	374.374	2403	1832.6	3256.37	3126.23
1c0314	tig	PPIase {ECO:0000255	248.25	43.0193	64.0191	217.23	279.27	47.1195	38.9191	58.2372	69.8009
1c0056	lcb5	Sphingosine kinase and enzymes related to eukaryotic diacylglycerol kinase	247.897	45.8886	81.1361	156.592	339.203	43.1572	48.62	80.6027	81.6695
1c0352	spoIIAA	Anti-sigma-B factor antagonist (Anti-anti-sigma-B factor)	247.266	329.613	343.98	33.3316	461.201	333.004	326.222	343.625	344.336
1c0670	pleD	Response regulator containing a CheY-like receiver domain and a GGDEF domain	247.143	115.822	166.475	216.499	277.787	126.324	105.32	151.021	181.93
1d0498	rnhB	Ribonuclease HII {ECO:0000255	246.504	119.551	174.569	164.189	328.819	93.2809	145.821	170.594	178.545
1c0414	slpA	FKBP-type peptidyl-prolyl cis-trans isomerases 2	244.902	42.4781	81.7998	167.348	322.457	47.3043	37.652	91.2971	72.3025
1d0790	pflA	Pyruvate-formate lyase-activating enzyme	244.541	617.484	639.039	177.241	311.84	611.876	623.092	652.003	626.076
1d0172	hemK	Protein-glutamine N-methyltransferase PrmC {ECO:0000255	244.018	157.41	483.918	145.038	342.999	131.795	183.025	504.866	462.97
1d0429	cobT	N(1)-alpha-phosphoribosyltransferase {ECO:0000255	242.936	217.985	204.65	181.978	303.894	154.044	281.926	214.787	194.512
1d0532	ftsK	DNA translocase ftsK	242.598	190.472	187.83	166.819	318.377	163.608	217.337	184.604	191.055
1d0358	1d0358	Uncharacterized homolog of plant Iojap protein	241.571	22.6705	133.632	258.868	224.274	43.8083	1.53272	126.513	140.75
1c0600	1c0600	hypothetical protein	240.349	74.1181	89.2564	164.619	316.079	77.4456	70.7906	89.3009	89.2118
1d0122	1d0122	hypothetical protein	239.888	271.531	246.618	53.6916	426.084	322.065	220.996	229.999	263.237
1c0101	gcvP	Probable glycine dehydrogenase [decarboxylating] subunit 1	239.006	215.301	153.419	231.741	246.27	196.445	234.156	160.196	146.642
1d0689	degQ	Trypsin-like serine proteases, typically periplasmic, contain C-terminal PDZ domain	238.857	91.2563	186.195	64.9619	412.752	86.5347	95.9779	176.056	196.333
1d0308	hit	Diadenosine tetraphosphate (Ap4A) hydrolase and other HIT family hydrolases	238.74	81.5319	60.665	32.1823	445.297	96.0868	66.9771	60.002	61.328
1d0470	1d0470	Predicted kinase related to dihydroxyacetone kinase	238.258	56.4808	57.881	196.663	279.854	57.8461	55.1155	50.7052	65.0569
1c0268	queA	Queuosine biosynthesis protein QueA {ECO:0000255	238.079	164.786	141.172	124.438	351.72	193.845	135.728	135.288	147.056
1c0372	1c0372	hypothetical protein	237.071	223.511	194.916	265.223	208.92	278.135	168.886	188.065	201.767
1d0371	phoH	Phosphate starvation-inducible protein PhoH, predicted ATPase	236.833	41.3696	87.6738	39.003	434.663	0	82.7392	96.551	78.7966
1c0043	1c0043	Uncharacterized conserved protein	236.645	139.055	151.994	80.4556	392.834	115.797	162.314	161.966	142.023
1d0082	1d0082	Uncharacterized protein Mb2925c	235.88	95.6647	84.3372	37.7085	434.052	125.577	65.752	85.4692	83.2052
1d0887	1d0887	FOG: GGDEF domain	235.563	149.382	71.6257	115.959	355.167	185.567	113.197	73.8442	69.4072
1d0686	sdaA	L-serine deaminase	234.17	372.91	298.332	175.973	292.367	378.175	367.646	299.142	297.522
1d0936	fusA	Elongation factor G {ECO:0000255	234.097	33.2085	32.5537	150.4	317.795	41.9443	24.4727	28.4732	36.6342
1d0935	rpsG	Ribosomal protein S7	233.226	24.3246	36.8375	59.4449	407.007	24.5749	24.0744	29.5551	44.12
1d0672	1d0672	Hypothetical protein in xynA 3'region (ORF6)	232.886	230.839	297.394	185.4	280.372	329.821	131.857	293.169	301.619
1c0174	proC	Pyrroline-5-carboxylate reductase	232.308	36.8561	42.2295	249.856	214.759	47.2577	26.4544	42.447	42.0121
1c0074	1c0074	hypothetical protein	232.061	12.0039	31.7123	266.653	197.468	12.7588	11.249	3.24941	60.1752
1c0362	1c0362	hypothetical protein	231.71	32.8415	62.8321	304.025	159.396	61.7061	3.97693	62.5511	63.113
1d0243	livK	ABC-type branched-chain amino acid transport systems, periplasmic component	231.67	48.0298	91.1769	33.4169	429.922	75.6521	20.4075	81.3266	101.027
1d0932	rpoB	Transcriptase subunit beta {ECO:0000255	230.856	47.9429	53.9883	153.976	307.735	56.2933	39.5926	49.5124	58.4643
1d0487	fabB	3-oxoacyl-(acyl-carrier-protein) synthase	229.607	40.4482	47.1918	268.604	190.609	49.1431	31.7534	48.2656	46.118
1d0823	mfd	Transcription-repair coupling factor (superfamily II helicase)	229.353	139.589	119.271	356.789	101.917	150.949	128.229	115.743	122.799
1d0841	ispA	Geranylgeranyl pyrophosphate synthase	229.126	109.376	121.683	173.512	284.739	82.1162	136.636	128.402	114.964
1d0740	1d0740	Uncharacterized protein conserved in bacteria	228.567	132.342	136.987	223.989	233.145	123.097	141.588	139.984	133.99
1c0227	pilM	Tfp pilus assembly protein, ATPase PilM	228.434	74.5669	99.3601	5.00421	451.863	52.8686	96.2653	101.35	97.3702
1d0516	1d0516	Ribosome maturation factor RimP {ECO:0000255	227.872	120.948	161.693	138.265	317.48	103.204	138.692	187.021	136.364
1d0104	wrbA	Multimeric flavodoxin WrbA	227.546	74.0734	42.9975	38.486	416.605	99.4396	48.7072	46.4297	39.5654
1c0345	ttdA	Tartrate dehydratase alpha subunit/Fumarate hydratase class I, N-terminal domain	227.128	291.416	158.041	195.837	258.418	255.811	327.021	176.746	139.335
1c0624	1c0624	HD-GYP domain	226.859	52.6461	120.852	172.831	280.888	62.518	42.7741	120.363	121.341
1d0552	pflA	Pyruvate-formate lyase-activating enzyme	225.839	82.9323	73.1366	180.383	271.294	86.4595	79.405	76.2655	70.0077
1c0595	trkA	K+ transport systems, NAD-binding component	225.673	69.683	58.0561	132.215	319.13	55.3731	83.9929	71.6494	44.4628
1d0098	hyfB	Formate hydrogenlyase subunit 3/Multisubunit Na+/H+ antiporter, MnhD subunit	225.387	39.4102	46.7406	108.814	341.96	32.6808	46.1396	44.3697	49.1116
1d0315	tktA	Transketolase	225.275	127.657	192.367	198.634	251.917	79.8352	175.478	193.713	191.02
1d0781	porB	Pyruvate:ferredoxin oxidoreductase and related 2-oxoacid:ferredoxin oxidoreductases, beta subunit	224.786	42.5913	89.0612	156.048	293.524	71.6789	13.5037	90.8371	87.2852
1d0114	ilvD	Dihydroxy-acid dehydratase	224.428	28.3516	44.6195	147.98	300.876	34.7591	21.9441	40.3278	48.9112
1c0656	kamA	Lysine 2,3-aminomutase	224.285	89.3435	154.65	122.801	325.77	118.455	60.2317	169.876	139.423
1c0078	lexA	SOS-response transcriptional repressors (RecA-mediated autopeptidases)	223.906	84.5072	93.776	77.4154	370.397	79.0221	89.9924	77.9858	109.566
1d0084	1d0084	hypothetical protein	223.894	219.67	166.027	156.479	291.31	210.497	228.843	162.217	169.836
1d0940	rplD	50S ribosomal protein L4 {ECO:0000255	223.334	69.1133	25.9729	169.688	276.979	77.9446	60.282	31.3436	20.6022
1d0731	1d0731	hypothetical protein	222.052	301.724	261.388	195.142	248.962	292.292	311.155	285.357	237.418
1c0219	efp	Elongation factor P {ECO:0000255	221.906	46.5058	78.2343	149.725	294.087	45.8497	47.1618	85.3881	71.0804
1d0016	rpsD	30S ribosomal protein S4 A {ECO:0000255	221.656	30.0773	35.1816	142.895	300.416	43.0746	17.0799	37.2205	33.1427
1d0204	1d0204	S-methyl-5-thioribose-1-phosphate isomerase {ECO:0000255	221.38	76.3461	83.1475	182.55	260.21	60.7929	91.8993	94.4314	71.8637
1c0282	snz1	Pdx1 {ECO:0000255	221.011	47.596	149.608	155.548	286.475	0	95.1919	151.942	147.273
1d0548	1d0548	LL-diaminopimelate aminotransferase {ECO:0000255	220.198	48.2894	60.2499	145.07	295.327	67.7471	28.8317	55.5093	64.9906
1d0495	trmD	tRNA [GM37] methyltransferase {ECO:0000255	220.072	84.8039	89.212	213.112	227.031	87.7643	81.8434	81.1328	97.2911
1c0549	1c0549	hypothetical protein	219.927	41.1962	87.7853	161.143	278.711	40.0938	42.2986	100.147	75.4234
1d0203	sam1	S-adenosylhomocysteine hydrolase	219.642	54.9631	75.0751	146.659	292.624	45.9316	63.9946	75.7112	74.4389
1d0575	1d0575	hypothetical protein	219.485	26.5688	48.2314	219.597	219.374	31.5217	21.6158	44.1537	52.3092
1d0477	rpmF	50S ribosomal protein L32 {ECO:0000255	218.875	55.8307	34.2371	0	437.75	65.3942	46.2673	46.2627	22.2116
1d0175	glyA	Serine hydroxymethyltransferase {ECO:0000255	218.699	72.7265	53.9914	260.243	177.155	78.3193	67.1337	59.3798	48.603
1d0496	lepB	Signal peptidase I	218.529	71.1008	54.5863	223.644	213.414	92.851	49.3506	66.0363	43.1363
1d0755	1d0755	hypothetical protein	218.362	133.6	56.1783	75.6718	361.052	162.209	104.991	51.6392	60.7173
1c0477	ubiB	2-polyprenylphenol hydroxylase and related flavodoxin oxidoreductases	217.627	31.5121	49.9872	93.3286	341.925	38.2763	24.7479	45.8166	54.1577
1d0376	cdd	Cytidine deaminase	217.199	192.262	564.45	0	434.398	350.75	33.7734	622.25	506.65
1d0486	1d0486	Dioxygenases related to 2-nitropropane dioxygenase	217.02	25.2451	33.8178	115.577	318.463	21.2357	29.2545	36.337	31.2986
1c0571	1c0571	Predicted amino acid racemase	216.874	95.5469	90.5936	274.801	158.946	103.601	87.4926	91.7416	89.4456
1c0448	livH	Branched-chain amino acid ABC-type transport system, permease components	216.047	197.124	134.468	215.374	216.72	292.984	101.264	128.803	140.132
1c0677	hypC	Hydrogenase maturation factor	215.356	196.05	151.577	128.729	301.983	172.464	219.637	139.612	163.541
1d0580	1d0580	Uncharacterized conserved protein	215.345	43.5115	67.3457	177.562	253.127	62.6631	24.3599	66.496	68.1955
1c0481	prsA	Phosphoribosylpyrophosphate synthetase	215.199	73.2634	167.087	98.8527	331.545	64.1039	82.4229	177.29	156.885
1c0182	1c0182	Uncharacterized conserved protein	214.95	39.9958	54.5183	198.28	231.62	37.6875	42.3041	53.4902	55.5463
1d0809	soxR	Predicted transcriptional regulators	214.57	69.9277	64.1284	331.835	97.3057	69.8614	69.9941	72.7867	55.4701
1c0546	1c0546	Uncharacterized conserved protein	214.386	61.803	120.348	185.195	243.576	66.0392	57.5669	124.36	116.335
1d0091	mnhF	Multisubunit Na+/H+ antiporter, MnhF subunit	214.362	23.4284	29.1611	124.438	304.286	9.52656	37.3302	33.3606	24.9616
1c0426	panC	Pantoate-activating enzyme {ECO:0000255	214.287	39.0916	50.9046	152.238	276.337	36.4847	41.6986	49.3633	52.4458
1d0347	1d0347	Uncharacterized protein conserved in bacteria	213.581	110.253	217.275	0	427.163	143.545	76.9618	221.077	213.472
1d0942	rplB	50S ribosomal protein L2 {ECO:0000255	212.193	161.399	169.733	87.6008	336.786	216.669	106.128	157.661	181.805
1d0155	ompR	Response regulators consisting of a CheY-like receiver domain and a winged-helix DNA-binding domain	212.057	54.4918	63.4081	73.487	350.628	74.2621	34.7215	75.2225	51.5938
1c0480	rplY	General stress protein CTC {ECO:0000255	211.858	91.0193	84.3798	79.2412	344.475	86.9523	95.0863	73.3875	95.372
1d0883	cheB	Chemotaxis response regulator containing a CheY-like receiver domain and a methylesterase domain	211.481	46.6824	66.6347	99.6204	323.341	37.3302	56.0346	74.3712	58.8981
1c0652	fabG	Uncharacterized oxidoreductase YxnA	211.246	64.3196	80.8464	232.467	190.026	84.7968	43.8424	70.4871	91.2057
1d0443	rpe	Pentose-5-phosphate-3-epimerase	211.244	71.6912	97.3288	174.991	247.498	89.9494	53.433	96.8729	97.7847
1d0882	cheY	FOG: CheY-like receiver	210.977	44.5566	55.7916	0	421.955	51.8583	37.2549	57.2315	54.3518
1c0226	1c0226	hypothetical protein	210.856	30.9034	48.7654	110.885	310.826	23.3448	38.4621	56.752	40.7788
1c0194	1c0194	hypothetical protein	210.821	43.4966	34.1781	63.6331	358.009	53.5869	33.4063	36.445	31.9111
1d0610	bioF	Alpha-oxoamine synthase	210.471	62.7641	62.1327	178.664	242.278	60.4708	65.0574	48.8148	75.4506
1d0080	lipA	Sulfur insertion protein LipA {ECO:0000255	210.385	31.5771	49.5398	261.193	159.577	39.5043	23.6499	42.8522	56.2274
1d0814	mdlB	ABC-type multidrug transport system, ATPase and permease components	209.783	22.2953	41.5026	201.152	218.414	32.6107	11.98	51.2593	31.7459
1c0622	napF	Cytochrome c and 4Fe-4S ferredoxin iron-sulfur binding domains containing protein	209.695	114.562	149.607	125.403	293.988	140.683	88.4421	146.349	152.865
1c0502	1c0502	Uncharacterized protein, 4-oxalocrotonate tautomerase homolog	209.513	35.7727	25.8215	210.742	208.284	20.7433	50.8021	15.4085	36.2345
1d0230	1d0230	Predicted alternative tryptophan synthase beta-subunit (paralog of TrpB)	209.387	45.3317	71.7009	62.6366	356.138	0	90.6634	70.5274	72.8744
1c0667	nfi	Deoxyribonuclease V {ECO:0000255	209.111	268.789	303.694	216.205	202.017	281.383	256.194	287.177	320.212
1d0702	acrA	Membrane-fusion protein	208.68	159.225	177.384	152.998	264.363	134.532	183.919	183.778	170.99
1c0206	pyrG	UTP--ammonia ligase {ECO:0000255	207.14	39.6156	117.161	72.8587	341.422	0	79.2312	110.093	124.228
1c0566	hepA	Superfamily II DNA/RNA helicases, SNF2 family	207.034	68.6282	68.474	278.404	135.665	72.6602	64.5962	67.7749	69.1731
1c0225	1c0225	hypothetical protein	206.234	20.4149	44.4139	25.9246	386.543	0	40.8299	45.4917	43.336
1c0113	dfp	Phosphopantothenoylcysteine synthetase/decarboxylase	205.642	150.644	160.626	101.897	309.388	185.094	116.194	160.519	160.733
1c0430	folE	GTP cyclohydrolase I {ECO:0000255	205.598	134.592	97.444	207.397	203.8	124.753	144.432	85.9287	108.959
1d0030	alr	Alanine racemase {ECO:0000255	205.512	183.65	385.514	143.964	267.06	156.2	211.099	405.07	365.959
1d0590	manC	Mannose-1-phosphate guanylyltransferase [GDP]	205.394	146.359	114.882	194.5	216.287	146.261	146.458	117.437	112.327
1d0863	mscL	Large-conductance mechanosensitive channel {ECO:0000255	205.384	115.073	160.949	99.7404	311.028	124.354	105.793	148.977	172.921
1d0323	1d0323	Predicted redox protein, regulator of disulfide bond formation	204.956	99.7281	226.644	85.3987	324.514	89.6617	109.795	235.486	217.802
1d0666	lytB	Putative cell wall-binding domain	204.461	92.1395	53.5946	122.66	286.262	122.484	61.7947	48.3512	58.838
1c0284	lgt	Prolipoprotein diacylglyceryl transferase	204.253	26.8141	19.81	6.91323	401.592	36.5185	17.1097	14.6584	24.9616
1d0450	1d0450	Hypothetical UPF0135 protein yqfO	204.051	86.7359	61.6098	240.353	167.749	71.6449	101.827	71.4157	51.8038
1d0515	proS	Prolyl-tRNA synthetase {ECO:0000255	203.494	69.7066	56.527	237.444	169.543	68.9245	70.4887	48.2244	64.8295
1d0255	polA	DNA polymerase I - 3'-5' exonuclease and polymerase domains	203.341	110.73	143.43	156.962	249.721	106.687	114.774	159.428	127.432
1d0573	1d0573	Predicted metal-dependent phosphoesterases (PHP family)	203.3	52.2936	101.921	147.77	258.829	66.0905	38.4967	106.337	97.5061
1c0049	glnD	[Protein-PII]-UMP uridylyl-removing enzyme {ECO:0000255	201.727	66.8364	100.695	132.677	270.777	58.022	75.6508	102.589	98.8011
1d0780	porA	Pyruvate:ferredoxin oxidoreductase and related 2-oxoacid:ferredoxin oxidoreductases, alpha subunit	201.598	80.4421	194.802	136.693	266.504	114.752	46.1324	186.792	202.813
1d0447	ribH	6,7-dimethyl-8-ribityllumazine synthase {ECO:0000255	201.457	88.6826	323.67	84.8441	318.069	139.187	38.1786	305.74	341.601
1c0030	1c0030	Hypothetical UPF0126 protein SCO4104	201.161	183.216	264.671	71.046	331.276	189.872	176.559	266.339	263.003
1d0725	1d0725	hypothetical protein	200.641	85.0003	213.378	86.1494	315.133	98.9296	71.0709	207.862	218.894
1c0557	purD	Phosphoribosylamine-glycine ligase	200.451	66.5548	49.9085	197.637	203.265	58.5043	74.6054	44.3143	55.5028
1d0120	leuA	Alpha-isopropylmalate synthase {ECO:0000255	199.953	30.5706	44.379	130.226	269.681	44.8634	16.2777	42.3178	46.4401
1d0941	rplW	50S ribosomal protein L23 {ECO:0000255	198.645	49.8057	21.3058	116.661	280.63	58.0525	41.559	27.0107	15.601
1c0021	sirA	Predicted redox protein, regulator of disulfide bond formation	198.323	120.489	94.3412	138.265	258.382	121.728	119.249	89.2985	99.384
1d0537	cinA	CinA-like protein {ECO:0000255	197.228	212.764	150.34	111.437	283.018	196.219	229.309	146.999	153.681
1d0948	rpsQ	30S ribosomal protein S17 {ECO:0000255	197.057	68.4836	30.1666	0	394.114	88.6955	48.2718	34.5109	25.8223
1c0592	1c0592	Uncharacterized vancomycin resistance protein	196.689	42.2058	48.7249	235.05	158.328	58.7471	25.6645	53.0736	44.3761
1d0187	atpD	F0F1-type ATP synthase, beta subunit	195.114	0	51.9602	0	390.228	0	0	57.6163	46.304
1d0258	rpsA	Ribosomal protein S1	194.874	44.4809	68.9352	112.325	277.424	43.2489	45.7129	76.571	61.2994
1d0392	mrp	ATPases involved in chromosome partitioning	194.761	46.7382	66.8348	176.833	212.688	58.6635	34.8128	67.1601	66.5094
1d0149	frvX	Cellulase M and related proteins	194.135	98.6116	127.334	98.2406	290.029	78.9701	118.253	116.722	137.945
1c0098	1c0098	Glycogen accumulation regulator GarA	193.32	82.6531	102.17	135.975	250.664	59.6198	105.686	93.9961	110.343
1c0554	1c0554	Peptide methionine sulfoxide reductase MsrB	192.782	429.299	912.028	84.8441	300.72	514.991	343.607	897.722	926.333
1c0125	ccmA	ABC-type multidrug transport system, ATPase component	192.711	133.785	116.607	108.732	276.69	91.5659	176.004	122.342	110.873
1d0110	1d0110	hypothetical protein	192.2	122.913	78.6643	71.1828	313.217	143.504	102.322	80.3815	76.9472
1c0513	iscU	NifU homolog involved in Fe-S cluster formation	192.066	218.641	410.994	100.219	283.914	89.1916	348.091	404.845	417.143
1c0488	wrbA	Multimeric flavodoxin WrbA	191.118	92.5875	55.4948	251.987	130.249	70.7347	114.44	46.4015	64.588
1c0290	1c0290	hypothetical protein	190.672	57.6134	47.4827	0	381.345	63.8482	51.3786	39.2003	55.7652
1d0197	1d0197	hypothetical protein	189.599	91.3891	71.1922	89.2708	289.927	121.153	61.6252	69.1276	73.2568
1d0089	1d0089	hypothetical protein	189.562	830.26	379.823	128.098	251.025	869.999	790.521	405.411	354.234
1c0661	tdk	Thymidine kinase {ECO:0000255	189.303	51.4828	30.6849	190.671	187.935	66.8395	36.126	27.1483	34.2215
1d0544	miaB	tRNA-i(6)A37 methylthiotransferase {ECO:0000255	189.078	151.309	164.398	100.219	277.937	119.881	182.736	155.404	173.391
1c0054	1c0054	hypothetical protein	188.831	81.2689	134.504	119.829	257.833	88.9145	73.6234	133.105	135.902
1d0267	1d0267	Nucleotide-binding protein Bcer98_3698 {ECO:0000255	188.554	22.5264	72.2473	121.206	255.901	2.78373	42.2691	69.1237	75.371
1c0563	hipB	Predicted transcriptional regulators	188.382	51.7219	99.6246	195.938	180.825	9.47392	93.9699	120.641	78.6082
1d0224	ftsX	Cell division protein	188.248	28.3409	41.5358	91.7986	284.698	44.9778	11.7039	40.7188	42.3528
1d0523	ribF	FAD synthase	188.192	139.357	124.55	172.941	203.442	113.68	165.034	119.906	129.194
1d0838	selB	Selenocysteine-specific elongation factor (SelB translation factor)	187.753	106.678	97.4414	155.303	220.202	100.949	112.408	103.481	91.4016
1d0096	hyfB	NDH-1 subunit N {ECO:0000255	187.032	46.27	49.1718	78.9248	295.139	53.4736	39.0664	48.4732	49.8704
1d0881	cheW	Chemotaxis signal transduction protein	186.48	50.702	57.9811	89.9552	283.005	72.31	29.0939	46.0398	69.9224
1d0734	tauA	ABC-type nitrate/sulfonate/bicarbonate transport systems, periplasmic components	186.332	263.025	186.646	78.4745	294.19	193.106	332.945	170.901	202.391
1c0067	fusA	Translation elongation factors (GTPases)	186.318	34.1147	45.3935	62.219	310.417	47.8399	20.3896	38.9646	51.8224
1d0400	wcaG	Nucleoside-diphosphate-sugar epimerases	184.686	33.8807	61.1564	114.403	254.969	67.7615	0	67.357	54.9557
1c0584	1c0584	Uncharacterized conserved protein related to dihydrodipicolinate reductase	184.663	85.9721	84.802	71.3689	297.956	103.391	68.553	90.3144	79.2897
1c0306	rpmI	50S ribosomal protein L35 {ECO:0000255	184.501	56.2062	48.9242	28.2814	340.72	51.963	60.4494	49.6273	48.2212
1d0742	cyoE	Polyprenyltransferase (cytochrome oxidase assembly factor)	184.192	40.1622	42.3775	79.8205	288.564	43.7156	36.6087	45.342	39.413
1c0338	nuoB	NDH-1 subunit B {ECO:0000255	183.899	30.9111	49.4754	123.688	244.109	54.2325	7.58972	49.3283	49.6224
1d0227	trpE	Anthranilate synthase component I	183.637	139.228	89.4316	37.5568	329.717	146.636	131.82	90.3426	88.5206
1d0856	1d0856	hypothetical protein	183.599	181.319	166.135	132.277	234.921	189.031	173.607	196.653	135.618
1c0223	aroC	5-enolpyruvylshikimate-3-phosphate phospholyase {ECO:0000...	183.402	108.261	118.066	155.144	211.661	106.895	109.627	124.777	111.355
1d0471	degV	Uncharacterized protein conserved in bacteria	182.276	36.7584	53.377	92.3392	272.213	39.3854	34.1314	54.4936	52.2605
1c0476	gltD	NADPH-dependent glutamate synthase beta chain and related oxidoreductases	181.726	104	72.7977	74.1942	289.257	118.384	89.6158	78.2305	67.3649
1d0257	1d0257	hypothetical protein	181.3	176.106	158.219	0	362.599	208.223	143.988	155.972	160.467
1c0245	ccmA	ABC-type multidrug transport system, ATPase component	181.155	18.3428	33.3764	64.9756	297.335	6.78315	29.9025	32.3912	34.3616
1d0844	1d0844	hypothetical protein	180.971	119.004	172.76	34.5661	327.376	115.906	122.101	172.868	172.651
1c0696	phrB	Deoxyribodipyrimidine photolyase	180.968	67.9891	83.3204	129.908	232.028	86.3671	49.6112	80.2353	86.4054
1d0541	1d0541	hypothetical protein	180.779	108.209	126.389	62.219	299.339	86.9298	129.489	138.371	114.407
1c0165	vicK	Signal transduction histidine kinase	180.205	173.441	141.804	123.41	237.001	177.855	169.027	139.408	144.199
1d0307	xseA	Exodeoxyribonuclease VII large subunit {ECO:0000255	180.079	147.755	99.5091	37.6662	322.491	84.5856	210.924	103.733	95.2849
1d0840	nfnB	Nitroreductase	179.781	101.576	113.207	10.7894	348.773	81.7742	121.377	104.131	122.283
1c0587	rplI	50S ribosomal protein L9 {ECO:0000255	179.733	63.573	89.4322	81.1553	278.311	79.2154	47.9307	68.9792	109.885
1d0461	fmt	Methionyl-tRNA formyltransferase {ECO:0000255	179.488	61.982	67.8987	151.507	207.468	61.2421	62.7219	59.8186	75.9788
1d0432	hisC	Imidazole acetol-phosphate transaminase {ECO:0000255	179.338	55.1883	91.2469	55.9463	302.729	53.7329	56.6437	84.0419	98.4519
1d0938	rpsJ	30S ribosomal protein S10 {ECO:0000255	179.164	62.0499	24.062	36.2441	322.084	87.4038	36.6959	17.225	30.899
1d0504	fliA	RNA polymerase sigma factor whiG	178.981	54.5741	38.7698	147.917	210.046	67.9441	41.204	36.565	40.9746
1d0217	secA	Protein translocase subunit SecA {ECO:0000255	178.826	69.322	77.4206	142.022	215.63	72.2258	66.4183	79.9566	74.8847
1d0511	cdsA	CDP-diglyceride synthetase	178.792	86.7214	78.9238	61.5353	296.049	94.2187	79.224	78.9856	78.8621
1c0615	1c0615	hypothetical protein	178.454	104.637	129.16	111.994	244.913	171.478	37.7968	131.016	127.304
1d0232	trpB	Tryptophan synthase beta chain	177.894	72.8382	59.8176	63.4272	292.361	70.7555	74.9208	54.6563	64.9788
1d0253	glnA	Glutamate--ammonia ligase 2	177.864	50.0704	136.109	4.20399	351.524	63.7249	36.4158	141.086	131.133
1c0057	suhB	Archaeal fructose-1,6-bisphosphatase and related enzymes of inositol monophosphatase family	177.471	111.884	122.837	69.3893	285.553	101.994	121.774	108.571	137.103
1d0043	groS	Protein Cpn10 {ECO:0000255	176.945	568.646	593.573	38.0933	315.797	503.06	634.232	650.345	536.801
1d0517	nusA	Transcription elongation factor	176.226	42.9141	43.4416	192.075	160.377	52.0316	33.7966	53.2937	33.5894
1d0748	serS	Seryl-tRNA(Ser/Sec) synthetase {ECO:0000255	175.861	71.7615	78.2218	126.473	225.25	37.0601	106.463	88.645	67.7986
1d0822	1d0822	Uncharacterized membrane protein, possible Na+ channel or pump	175.676	37.5479	51.4935	148.141	203.211	45.9316	29.1642	54.6983	48.2887
1c0285	htpX	Protease HtpX homolog {ECO:0000255	175.646	36.0715	59.7771	75.417	275.874	36.0854	36.0575	56.52	63.0342
1c0378	wcaA	Glycosyltransferases involved in cell wall biogenesis	175.604	212.883	182.49	50.1093	301.099	284.838	140.928	185.936	179.045
1c0385	hemD	Uroporphyrinogen-III synthase	174.82	212.246	193.594	0	349.641	184.18	240.313	200.669	186.518
1d0118	1d0118	Serine-pyruvate aminotransferase/archaeal aspartate aminotransferase	174.82	46.2011	53.207	43.862	305.778	41.4144	50.9878	51.6681	54.746
1d0604	thiH	Thiamine biosynthesis enzyme ThiH and related uncharacterized enzymes	174.698	361.999	319.43	137.698	211.699	364.274	359.724	310.984	327.876
1d0266	1d0266	hypothetical protein	174.28	58.8007	137.366	0	348.56	14.7826	102.819	132.71	142.023
1d0494	rimM	Ribosome maturation factor RimM {ECO:0000255	174.26	28.6858	70.4992	150.184	198.336	32.0289	25.3427	63.5315	77.4669
1c0313	clpP	Endopeptidase Clp {ECO:0000255	174.191	20.0378	75.1243	18.2104	330.172	6.27359	33.802	62.5788	87.6699
1c0470	ntpG	V-type ATP synthase subunit F	174.139	7.6754	39.0333	135.751	212.528	3.89723	11.4536	37.2205	40.8462
1d0099	hyfB	Formate hydrogenlyase subunit 3/Multisubunit Na+/H+ antiporter, MnhD subunit	173.658	49.4191	43.118	117.651	229.665	41.5704	57.2679	37.2205	49.0154
1d0945	rpsC	30S ribosomal protein S3 {ECO:0000255	173.505	60.0406	49.4133	163.325	183.685	53.5869	66.4943	48.9036	49.9231
1c0164	rhsA	Toxin WapA	173.387	67.341	72.1261	95.2087	251.565	76.8086	57.8733	68.5008	75.7513
1d0113	leuB	Isocitrate/isopropylmalate dehydrogenase	173.251	50.7203	84.5494	173.872	172.629	65.7724	35.6682	90.1109	78.988
1c0302	argC	N-acetyl-glutamate semialdehyde dehydrogenase {ECO:000025...	172.275	120.667	80.841	118.684	225.866	79.2962	162.038	83.2261	78.4558
1d0319	glpC	Fe-S oxidoreductase	172.069	47.1685	73.14	85.1736	258.964	47.4478	46.8892	69.0325	77.2476
1c0416	1c0416	Uncharacterized conserved protein (some members contain a von Willebrand factor type A (vWA) domain)	172.024	191.63	161.09	133.327	210.721	177.028	206.232	174.249	147.931
1d0671	1d0671	hypothetical protein	171.687	39.3349	74.4509	84.8441	258.53	28.3435	50.3263	67.6736	81.2282
1c0215	nusB	N utilization substance protein B homolog {ECO:0000255	171.206	50.3068	75.9785	51.1389	291.273	67.5341	33.0794	77.5851	74.3718
1d0735	tauB	ABC-type nitrate/sulfonate/bicarbonate transport system, ATPase component	171.158	118.795	94.7212	191.625	150.69	101.061	136.528	95.4807	93.9618
1c0014	smtA	SAM-dependent methyltransferases	170.11	36.5216	43.2974	248.876	91.343	43.9687	29.0745	43.3921	43.2027
1d0364	1d0364	Multiheme cytochrome c domain-containing protein	169.998	49.8993	65.8473	102.334	237.663	55.9372	43.8614	63.7482	67.9464
1d0168	rpmE	50S ribosomal protein L31 {ECO:0000255	169.805	43.8429	58.6135	69.1323	270.477	28.5797	59.1061	46.5026	70.7244
1d0294	1d0294	hypothetical protein	169.417	72.056	112.8	133.83	205.005	72.7973	71.3147	101.97	123.63
1c0422	1c0422	hypothetical protein	168.203	104.148	119.539	37.0842	299.322	122.079	86.2178	103.938	135.14
1d0265	uvrC	Excinuclease ABC subunit C {ECO:0000255	167.995	102.089	65.7176	227.704	108.287	95.6478	108.53	61.118	70.3171
1d0399	gmd	GDP-D-mannose dehydratase	167.897	28.2653	40.8137	144.405	191.388	28.2521	28.2784	38.7136	42.9139
1c0329	nuoN	NDH-1 subunit N {ECO:0000255	167.499	108.408	109.435	226.126	108.872	176.577	40.2389	103.408	115.461
1d0340	mreB	Actin-like ATPase involved in cell morphogenesis	167.378	44.3082	65.1494	130.987	203.769	40.1118	48.5046	70.6318	59.6669
1c0149	1c0149	hypothetical protein	167.337	79.649	106.46	0	334.673	105.152	54.1463	98.7084	114.211
1c0243	1c0243	hypothetical protein	167.06	21.1431	59.4885	24.5601	309.56	41.3653	0.920974	59.8575	59.1195
1d0468	1d0468	Cyclic di-GMP phosphodiesterase response regulator RpfG	166.452	184.254	97.6745	76.8999	256.004	234.418	134.09	85.6164	109.733
1d0066	glnA	Glutamate--ammonia ligase 2	166.443	34.838	38.6367	168.539	164.348	46.45	23.226	38.8168	38.4566
1c0514	nifS	Cysteine desulfurase IscS {ECO:0000255	165.769	155.961	414.909	74.85	256.688	95.6237	216.297	422.081	407.737
1d0052	hsdS	Type I restriction enzyme EcoprrI specificity protein (S protein)(S.EcoprrI)	165.667	64.7719	81.4302	17.8193	313.515	85.9436	43.6001	77.5204	85.3399
1c0531	purS	Phosphoribosylformylglycinamidine (FGAM) synthase, PurS component	165.545	15.6081	43.8603	207.397	123.694	5.29253	25.9237	43.8068	43.9139
1d0419	pulE	Type II secretory pathway, ATPase PulE/Tfp pilus assembly pathway, ATPase PilB	165.436	74.7936	239.596	64.016	266.857	68.096	81.4913	239.94	239.253
1c0588	rpsR	30S ribosomal protein S18 2 {ECO:0000255	165.083	143.941	281.193	64.9242	265.242	149.111	138.771	256.336	306.05
1c0658	proP	Permeases of the major facilitator superfamily	164.87	43.0835	60.3741	109.263	220.476	56.4623	29.7048	68.2375	52.5106
1d0004	rplF	50S ribosomal protein L6 {ECO:0000255	164.852	20.7972	18.7576	83.4222	246.282	26.3444	15.2501	22.8729	14.6423
1d0712	1d0712	Hypothetical signaling protein PA1727	164.817	106.708	122.794	75.7649	253.869	111.524	101.892	134.712	110.876
1c0099	lplA	Octanoyl-[acyl-carrier-protein]:[GcvH] N-octanoyltransfer...	164.58	46.2543	44.8538	253.217	75.9422	66.4643	26.0443	53.4263	36.2813
1c0117	1c0117	hypothetical protein	164.14	112.222	119.93	92.4045	235.875	97.6236	126.821	102.694	137.165
1c0501	argE	Acetylornithine deacetylase/Succinyl-diaminopimelate desuccinylase and related deacylases	164.033	67.0017	45.2476	103.929	224.136	58.2414	75.7619	39.21	51.2852
1d0436	cmk	Cytidine monophosphate kinase {ECO:0000255	163.988	25.1536	40.1404	120.683	207.294	25.8695	24.4376	42.3543	37.9265
1d0140	hisB	Imidazoleglycerol-phosphate dehydratase {ECO:0000255	163.783	45.0683	32.1298	109.263	218.304	50.1887	39.9478	35.9495	28.3101
1c0504	porB	Pyruvate:ferredoxin oxidoreductase and related 2-oxoacid:ferredoxin oxidoreductases, beta subunit	163.749	80.5505	158.547	67.9877	259.511	160.406	0.695305	160.878	156.216
1c0366	nrfG	FOG: TPR repeat	163.554	26.3653	23.4825	277.463	49.6446	34.7591	17.9714	19.9795	26.9855
1c0024	rfaG	Glycosyltransferase	163.218	61.5005	55.0308	169.272	157.164	75.6521	47.3489	61.8821	48.1795
1c0033	1c0033	hypothetical protein	163.167	86.2381	73.7403	76.3597	249.974	79.8932	92.583	79.4037	68.077
1d0569	mviN	Uncharacterized membrane protein, putative virulence factor	162.809	228.014	451.5	23.0035	302.614	282.275	173.753	455.077	447.924
1c0510	1c0510	hypothetical protein	162.697	24.3272	33.9044	110.262	215.133	39.7945	8.86001	38.5816	29.2271
1d0837	selA	Selenocysteinyl-tRNA(Sec) synthase {ECO:0000255	162.549	52.5317	68.6119	120.683	204.414	70.2173	34.8462	65.0021	72.2218
1d0018	rplQ	50S ribosomal protein L17 {ECO:0000255	162.269	9.86129	8.80761	0	324.539	7.26602	12.4566	8.09598	9.51924
1d0283	1d0283	Predicted metal-dependent phosphoesterases (PHP family)	161.929	52.1191	36.0288	106.661	217.196	68.2412	35.9969	38.4358	33.6217
1d0373	1d0373	Endoribonuclease YbeY {ECO:0000255	161.894	7.04638	26.9319	87.6913	236.097	0	14.0928	27.4782	26.3855
1c0404	1c0404	hypothetical protein	161.699	49.1895	45.1112	88.5599	234.837	51.6312	46.7479	40.3448	49.8776
1d0188	atpC	F-ATPase epsilon subunit {ECO:0000255	161.681	13.3683	31.2798	91.3706	231.99	14.9893	11.7473	32.4486	30.111
1d0058	aroA	3-deoxy-D-arabino-heptulosonate 7-phosphate (DAHP) synthase	161.156	20.3695	33.2406	76.1866	246.125	36.4537	4.28535	35.2793	31.202
1d0750	1d0750	hypothetical protein	160.527	94.5629	101.339	169.688	151.366	76.2501	112.876	111.661	91.016
1d0153	1d0153	hypothetical protein	160	30.1565	45.3125	119.143	200.857	21.8908	38.4223	41.2329	49.392
1d0474	coaD	Pantetheine-phosphate adenylyltransferase {ECO:0000255	159.928	99.4942	123.293	136.578	183.278	88.8758	110.113	138.139	108.446
1c0482	glmU	Glucosamine-1-phosphate N-acetyltransferase {ECO:0000255	159.845	77.8934	98.9379	85.3987	234.29	79.388	76.3987	104.066	93.8098
1d0081	1d0081	Uncharacterized conserved protein	159.559	78.8679	89.6216	145.946	173.171	65.2746	92.4613	96.038	83.2052
1c0367	1c0367	Redox-sensing transcriptional repressor Rex {ECO:0000255	159.411	62.2776	58.1439	51.8492	266.972	5.9541	118.601	62.5511	53.7367
1d0476	1d0476	Predicted metal-binding, possibly nucleic acid-binding protein	159.378	97.9351	82.539	104.864	213.893	118.012	77.8586	101.973	63.1051
1d0746	pheA	Prephenate dehydratase	158.577	34.948	55.1619	20.2888	296.865	69.8959	0	55.3812	54.9426
1c0332	nuoK	NDH-1 subunit K {ECO:0000255	158.57	28.5962	11.3566	172.831	144.309	39.694	17.4985	8.84561	13.8675
1d0374	dgkA	Diacylglycerol kinase	157.891	29.393	34.4833	47.6571	268.126	34.6604	24.1256	39.4907	29.4759
1c0283	1c0283	Putative lipoprotein YerB	157.866	39.8699	54.6257	61.6585	254.073	45.058	34.6817	56.9671	52.2844
1c0053	rsbU	Phosphoserine phosphatase rsbP	157.541	74.6746	87.153	139.884	175.199	65.258	84.0912	71.2739	103.032
1d0160	cheA	Chemotaxis protein histidine kinase and related kinases	157.535	44.1089	50.8334	143.023	172.047	46.7667	41.451	53.5266	48.1402
1c0252	1c0252	ATPase related to the helicase subunit of the Holliday junction resolvase	157.469	65.1918	93.9051	4.24221	310.696	4.87153	125.512	89.9495	97.8607
1d0791	1d0791	hypothetical protein	156.637	62.0788	81.0841	94.3772	218.896	72.252	51.9057	84.3385	77.8296
1c0196	1c0196	Transcriptional regulator MraZ	156.622	32.7942	53.413	0	313.244	20.6956	44.8927	56.4724	50.3535
1c0346	mdh	Malate dehydrogenase {ECO:0000255	156.301	65.0989	173.55	125.635	186.968	81.0673	49.1304	188.091	159.01
1c0689	1c0689	Predicted Rossmann fold nucleotide-binding protein	154.997	50.9706	111.653	12.8729	297.121	63.5651	38.376	125.181	98.1248
1d0019	cbiO	Energy-coupling factor transporter ATP-binding protein Ec...	154.811	54.9329	46.2225	132.598	177.024	42.1667	67.6992	40.2713	52.1738
1c0261	gloB	Zn-dependent hydrolases, including glyoxylases	154.768	55.9086	51.8198	0	309.536	58.5535	53.2638	47.9327	55.7069
1d0553	dut	Deoxyuridine 5'-triphosphate nucleotidohydrolase	154.67	30.8952	30.9533	103.698	205.641	26.7934	34.997	39.8052	22.1014
1c0527	purF	Amidophosphoribosyltransferase precursor	154.434	119.666	99.5205	95.8199	213.048	149.647	89.6844	96.4013	102.64
1d0014	rpsM	30S ribosomal protein S13 {ECO:0000255	153.45	51.8992	33.7546	89.5954	217.305	65.1616	38.6367	48.0392	19.47
1d0845	1d0845	hypothetical protein	153.234	165.925	155.444	81.8672	224.602	195.545	136.304	153.235	157.652
1d0642	lolE	ABC-type transport system, involved in lipoprotein release, permease component	152.691	263.52	252.046	117.889	187.494	238.039	289.002	270.077	234.015
1d0127	1d0127	Multiheme cytochrome c domain-containing protein	152.163	42.7364	52.202	58.0281	246.298	56.6411	28.8317	54.4486	49.9555
1d0768	1d0768	hypothetical protein	151.896	14.769	46.6408	35.5537	268.239	26.5383	2.99975	34.4437	58.838
1c0237	1c0237	Predicted GTPase	151.754	23.6123	30.1021	53.0276	250.48	34.1007	13.1239	24.0382	36.1659
1c0492	1c0492	hypothetical protein	151.273	55.1748	77.8413	94.0712	208.475	57.9932	52.3563	68.7805	86.902
1c0358	1c0358	Fe-S oxidoreductase	151.126	30.5399	38.8235	104.049	198.202	55.7593	5.32049	35.2714	42.3756
1d0223	ftsE	Predicted ATPase involved in cell division	150.548	40.8606	27.051	57.0568	244.038	50.5448	31.1764	30.394	23.708
1d0191	wecC	UDP-N-acetyl-D-mannosaminuronate dehydrogenase	150.403	74.1757	40.6503	0	300.807	45.5427	102.809	40.6589	40.6418
1c0217	accC	Biotin carboxylase	150.365	30.7718	37.3775	140.193	160.536	34.958	26.5857	44.2226	30.5324
1d0720	1d0720	hypothetical protein	150.36	51.3533	92.4194	45.0863	255.634	45.5618	57.1449	98.0159	86.8228
1d0861	1d0861	hypothetical protein	150.335	66.8213	101.904	93.3286	207.341	53.5869	80.0557	114.298	89.5106
1d0659	1d0659	Predicted phosphatase homologous to the C-terminal domain of histone macroH2A1	150.258	125.058	287.459	53.3306	247.185	118.985	131.132	301.359	273.558
1d0237	accD	Acetyl-coenzyme A carboxylase carboxyl transferase subuni...	150.179	49.3454	61.9705	18.2401	282.118	43.2884	55.4025	63.5698	60.3712
1c0606	recB	ATP-dependent helicase/nuclease AddA {ECO:0000255	149.745	21.333	40.5545	119.354	180.136	7.23375	35.4322	39.8759	41.2331
1c0445	livF	ABC-type branched-chain amino acid transport systems, ATPase component	149.686	30.6029	35.222	157.517	141.856	47.0298	14.176	29.3681	41.076
1c0442	hpt	Hypoxanthine-guanine phosphoribosyltransferase	149.464	24.8549	63.2618	94.2713	204.657	45.4677	4.24206	71.6839	54.8398
1c0673	pgi	Phosphohexose isomerase {ECO:0000255	149.296	393.915	742.175	40.7252	257.868	366.339	421.491	746.395	737.955
1d0189	murA	UDP-N-acetylglucosamine enolpyruvyl transferase {ECO:0000...	149.242	67.0353	120.506	126.178	172.306	69.9502	64.1204	120.569	120.444
1d0111	leuC	3-isopropylmalate dehydratase large subunit	149.126	60.7299	59.5801	101.742	196.51	62.9112	58.5485	56.3639	62.7964
1c0579	arsR	Predicted transcriptional regulators	149.064	16.5212	25.8967	90.6102	207.517	20.8104	12.232	31.8	19.9935
1d0260	mltE	Soluble lytic murein transglycosylase and related regulatory proteins (some contain LysM/invasin domains)	148.954	26.3957	17.4078	234.449	63.4602	2.07099	50.7203	15.8232	18.9925
1c0633	ompR	Response regulators consisting of a CheY-like receiver domain and a winged-helix DNA-binding domain	148.311	27.0001	58.6711	61.1991	235.424	31.625	22.3751	68.2375	49.1047
1d0075	metH	Methionine synthase	148.18	28.6679	64.6684	133.494	162.866	20.9775	36.3583	70.378	58.9588
1c0456	1c0456	hypothetical protein	147.579	61.1288	29.0291	146.079	149.078	85.739	36.5186	18.9878	39.0703
1d0296	1d0296	Predicted hydrolase (HAD superfamily)	147.222	55.4961	50.3302	62.4794	231.964	57.3985	53.5938	47.3951	53.2653
1d0625	1d0625	hypothetical protein	147.206	105.19	86.2254	79.8205	214.592	121.276	89.1043	79.4608	92.99
1c0142	pyrR	Uracil phosphoribosyltransferase {ECO:0000255	146.932	7.5538	43.0912	40.7994	253.065	9.37038	5.73722	26.8476	59.3349
1d0918	cysS	Cysteinyl-tRNA synthetase {ECO:0000255	146.87	35.3795	53.9555	70.6471	223.092	44.4067	26.3523	56.8193	51.0916
1c0384	hemB	Delta-aminolevulinic acid dehydratase	146.85	36.8495	28.2853	113.815	179.884	66.6568	7.04208	27.4614	29.1091
1d0829	1d0829	Uncharacterized conserved protein	145.996	72.4714	76.9278	30.5161	261.476	93.4485	51.4943	73.2577	80.598
1d0396	rfaG	Glycosyltransferase	145.657	34.9084	76.4502	98.2406	193.074	42.9769	26.8398	83.4584	69.4419
1d0209	hisM	ABC-type amino acid transport system, permease component	145.598	27.7721	41.4925	193.094	98.1019	41.0627	14.4815	44.9688	38.0162
1d0514	gcpE	1-hydroxy-2-methyl-2-(E)-butenyl 4-diphosphate synthase {...	145.352	69.0243	97.5425	151.626	139.077	78.0537	59.9949	104.363	90.7216
1d0094	mnhB	Multisubunit Na+/H+ antiporter, MnhB subunit	145.297	26.5307	22.6849	43.2077	247.387	27.7858	25.2756	27.1686	18.2011
1d0850	1d0850	hypothetical protein	145.16	61.797	46.8664	97.8116	192.508	80.4973	43.0968	38.1415	55.5913
1d0756	degV	Uncharacterized protein conserved in bacteria	144.916	38.0448	103.096	78.0448	211.788	35.8491	40.2405	127.916	78.2767
1c0386	hemC	Pre-uroporphyrinogen synthase {ECO:0000255	144.641	31.633	98.5004	11.6661	277.615	45.5488	17.7172	91.6942	105.307
1d0722	1d0722	UPF0182 protein PTH_1387 {ECO:0000255	144.557	44.0069	48.8701	90.5898	198.524	50.8047	37.209	50.8316	46.9086
1d0519	infB	Translation initiation factor IF-2 {ECO:0000255	144.394	31.1993	39.4158	77.9494	210.838	38.2245	24.174	39.741	39.0905
1d0310	acs	Acyl-activating enzyme {ECO:0000255	144.386	31.6508	38.6034	50.6761	238.096	44.6153	18.6862	39.9339	37.2729
1d0917	cysE	Serine acetyltransferase	144.18	51.2172	52.0018	16.0221	272.338	73.5957	28.8388	57.4015	46.6021
1d0273	gpmI	2,3-bisphosphoglycerate-independent phosphoglycerate muta...	143.77	103.943	83.2325	168.357	119.182	58.8405	149.046	89.3778	77.0872
1c0474	1c0474	Uncharacterized protein conserved in bacteria	143.619	25.6931	23.2993	118.137	169.1	43.4122	7.97401	27.6405	18.9581
1d0617	1d0617	hypothetical protein	143.131	50.8272	80.1304	0	286.262	81.6562	19.9983	84.4846	75.7762
1c0108	gcd1	Nucleoside-diphosphate-sugar pyrophosphorylase involved in lipopolysaccharide biosynthesis/translation initiation factor 2B, gamma/epsilon subunits (eIF-2Bgamma/eIF-2Bepsilon)	143.056	175.983	350.21	91.7619	194.35	172.198	179.769	363.934	336.487
1d0503	xerD	Site-specific recombinase XerD	142.927	233.674	513.845	18.2401	267.613	244.37	222.978	491.666	536.023
1d0582	mrcB	Membrane carboxypeptidase (penicillin-binding protein)	142.919	102.558	68.0802	108.962	176.876	88.1327	116.982	67.0252	69.1353
1c0325	argS	Arginyl-tRNA synthetase	142.722	39.2863	33.632	172.952	112.492	54.7111	23.8616	33.8802	33.3839
1d0897	tar	Frizzy aggregation protein frzCD	142.586	39.7029	50.7837	156.362	128.81	39.2783	40.1275	51.0888	50.4786
1d0146	hisI	Phosphoribosyl-ATP pyrophosphohydrolase	142.538	66.4379	30.1817	97.2172	187.86	80.3803	52.4955	36.962	23.4015
1d0649	1d0649	Multiheme cytochrome c domain-containing protein	142.525	56.3385	91.2344	61.2763	223.773	64.9538	47.7232	103.046	79.4232
1c0692	nth	Predicted EndoIII-related endonuclease	142.467	87.0104	95.3639	47.255	237.68	104.913	69.1081	90.4075	100.32
1d0641	1d0641	Predicted cobalamin binding protein	142.175	142.243	239.091	137.627	146.722	142.24	142.246	231.442	246.74
1d0171	prfA	Peptide chain release factor 1 {ECO:0000255	142.14	105.087	102.764	120.255	164.024	96.0661	114.108	105.892	99.6365
1c0412	1c0412	Multiheme cytochrome c domain-containing protein	142.122	11.2702	51.4024	63.2736	220.971	0	22.5405	47.8048	55.0001
1d0700	gyrA	Type IIA topoisomerase (DNA gyrase/topo II, topoisomerase IV), A subunit	141.764	17.4375	51.1506	75.8769	207.65	0	34.8751	45.3332	56.968
1d0244	livG	ABC-type branched-chain amino acid transport systems, ATPase component	141.201	25.8189	31.8849	63.5428	218.859	34.6604	16.9773	47.0403	16.7296
1c0653	1c0653	Predicted Rossmann fold nucleotide-binding protein	140.999	151.238	157.403	11.7394	270.259	132.114	170.363	138.192	176.615
1c0350	hybF	Probable hydrogenase nickel incorporation protein HypA {E...	140.686	14.9271	32.7371	130.987	150.385	18.8024	11.0517	35.9145	29.5597
1d0757	1d0757	hypothetical protein	140.644	36.0031	44.8462	73.8571	207.432	49.3462	22.6599	54.0009	35.6914
1d0143	hisF	ImGP synthase subunit HisF {ECO:0000255	140.352	7.79231	31.6853	109.369	171.335	0	15.5846	34.1188	29.2518
1d0377	era	GTPase Era {ECO:0000255	140.114	51.3792	108.825	97.5985	182.63	58.8405	43.9178	100.795	116.854
1d0709	rhaT	Permeases of the drug/metabolite transporter (DMT) superfamily	139.741	121.341	405.549	50.1093	229.373	152.489	90.1937	412.173	398.924
1c0497	ompR	Transcriptional regulatory protein yycF	139.718	43.1781	76.4358	40.402	239.034	0	86.3563	59.6709	93.2006
1d0133	lytB	Putative cell wall-binding domain	139.674	37.7346	41.5652	131.52	147.829	45.3092	30.16	46.6012	36.5291
1d0359	rhaT	Permeases of the drug/metabolite transporter (DMT) superfamily	139.602	113.403	80.5088	117.067	162.138	71.6981	155.109	82.741	78.2767
1d0361	comEA	DNA uptake protein and related DNA-binding proteins	139.521	100.124	80.3492	209.335	69.7077	100.162	100.085	54.8451	105.853
1d0678	arsR	Predicted transcriptional regulators	139.352	61.3357	78.4677	98.2406	180.463	54.151	68.5205	76.1387	80.7966
1d0878	csdB	Selenocysteine lyase	139.257	44.8816	56.3845	58.1788	220.335	42.3128	47.4505	56.3624	56.4066
1d0238	accA	Acetyl-coenzyme A carboxylase carboxyl transferase subuni...	139.115	58.2902	58.175	94.2118	184.019	64.9128	51.6675	71.4664	44.8836
1c0207	1c0207	hypothetical protein	138.972	201.639	122.418	135.34	142.603	177.436	225.842	124.93	119.906
1d0595	spoIIM	Uncharacterized membrane protein	138.868	64.3407	60.3008	115.936	161.801	74.5557	54.1258	61.88	58.7217
1c0466	ntpD	V-ATPase subunit D {ECO:0000255	138.746	34.9755	15.9849	77.4154	200.076	61.2421	8.70894	20.7543	11.2154
1d0234	nadE	Probable glutamine-dependent NAD(+) synthetase	138.593	51.5178	56.8065	178.602	98.5836	49.0627	53.9729	55.307	58.3061
1c0425	nadA	Quinolinate synthase A {ECO:0000255	138.488	78.9431	68.4814	107.583	169.393	86.4803	71.406	72.7605	64.2023
1c0323	thrA	Homoserine dehydrogenase	138.061	6.16504	30.983	138.908	137.214	5.98179	6.3483	10.1563	51.8098
1d0408	nuoB	NDH-1 subunit K {ECO:0000255	137.637	48.421	50.1613	100.648	174.626	4.20289	92.6392	53.5196	46.8029
1c0356	ssnA	5-methylthioadenosine/S-adenosylhomocysteine deaminase {E...	137.433	42.4319	63.0917	100.787	174.079	47.2213	37.6426	58.6577	67.5256
1d0095	mnhC	Multisubunit Na+/H+ antiporter, MnhC subunit	137.159	7.11804	31.6124	15.8184	258.499	0	14.2361	21.9748	41.25
1c0184	ftsQ	Cell division protein FtsQ {ECO:0000255	137.037	28.5084	65.5435	139.818	134.256	19.2672	37.7496	67.982	63.1051
1d0534	1d0534	UPF0234 protein BHWA1_00627 {ECO:0000255	136.808	62.0076	66.4714	0	273.616	64.5625	59.4528	73.1704	59.7724
1c0168	dksA	DnaK suppressor protein	136.605	60.15	56.2307	116.661	156.55	53.5869	66.7131	64.6835	47.778
1d0847	1d0847	hypothetical protein	136.095	38.6124	90.5857	93.3286	178.861	45.7275	31.4973	85.0695	96.102
1d0264	uvrA	Excinuclease ATPase subunit	136.069	285.962	150.38	123.783	148.354	254.961	316.963	145.669	155.09
1d0026	glmS	Glucosamine--fructose-6-phosphate aminotransferase [isomerizing]	136.002	99.5811	474.575	0	272.004	44.3478	154.814	492.341	456.809
1d0912	1d0912	Diadenylate cyclase {ECO:0000255	135.932	35.9882	50.6756	91.7986	180.066	40.9954	30.981	50.712	50.6392
1c0146	rhsA	Rhs family protein	135.56	87.2266	77.4212	81.7682	189.352	77.7091	96.744	75.6591	79.1832
1c0405	1c0405	hypothetical protein	135.296	101.01	100.59	33.6656	236.927	42.9554	159.065	94.63	106.549
1d0501	smf	Predicted Rossmann fold nucleotide-binding protein involved in DNA uptake	135.151	243.392	137.481	170.262	100.041	250.555	236.23	126.332	148.631
1c0248	alaS	Alanyl-tRNA synthetase	135.027	87.6522	59.715	100.954	169.1	65.1182	110.186	58.8932	60.5368
1c0704	fur	Fe2+/Zn2+ uptake regulation proteins	134.738	108.203	229.717	63.4888	205.988	104.987	111.419	209.819	249.616
1c0041	1c0041	Uncharacterized protein predicted to be involved in DNA repair	134.542	38.429	63.6685	80.3491	188.735	52.5222	24.3357	61.0071	66.33
1c0305	rplT	50S ribosomal protein L20 {ECO:0000255	134.517	53.0776	53.7511	0	269.034	57.1593	48.9958	59.1392	48.363
1d0908	greA	Transcript cleavage factor GreA {ECO:0000255	133.871	16.8059	32.186	0	267.742	18.9928	14.619	27.6405	36.7314
1c0128	thiI	tRNA 4-thiouridine synthase {ECO:0000255	133.848	122.668	147.943	68.4562	199.241	147.79	97.5467	152.158	143.727
1d0843	xerC	E2 protein	133.613	36.8007	55.6201	46.6643	220.561	37.5108	36.0907	58.0019	53.2383
1d0159	tar	Frizzy aggregation protein frzCD	133.2	72.6872	106.701	63.8924	202.507	104.815	40.5589	95.7661	117.637
1d0078	1d0078	hypothetical protein	132.833	52.6693	48.7945	44.7977	220.867	58.3025	47.036	43.672	53.917
1c0330	nuoM	NADH:ubiquinone oxidoreductase subunit 4 (chain M)	132.808	34.0391	47.2552	53.4397	212.176	32.437	35.6411	51.6317	42.8788
1d0360	leuS	Leucyl-tRNA synthetase {ECO:0000255	132.574	35.8721	42.2552	92.8862	172.262	41.1425	30.6017	42.3655	42.1448
1d0135	dnaE	DNA polymerase III, alpha subunit	131.446	28.4664	31.5807	69.2516	193.641	37.7281	19.2046	26.4943	36.667
1d0761	php	Predicted metal-dependent hydrolase with the TIM-barrel fold	130.966	8.71173	44.084	79.9959	181.936	1.22484	16.1986	44.8418	43.3261
1d0824	surA	Foldase protein prsA precursor	130.849	32.9235	57.2785	0	261.698	29.0194	36.8276	57.5295	57.0276
1d0328	ppiB	Peptidyl-prolyl cis-trans isomerase (rotamase) - cyclophilin family	130.712	21.468	32.3494	32.8911	228.534	18.8852	24.0508	30.0606	34.6383
1d0870	fdhD	Uncharacterized protein required for formate dehydrogenase activity	130.585	71.1714	75.9562	101.444	159.726	85.739	56.6039	77.4348	74.4777
1d0460	def	Polypeptide deformylase {ECO:0000255	130.576	43.8246	49.0065	45.2502	215.902	54.5612	33.0881	53.7629	44.25
1c0340	1c0340	hypothetical protein	130.539	98.8647	51.9747	82.9587	178.119	85.739	111.99	56.1064	47.843
1c0319	icc	Predicted phosphohydrolases	130.371	35.3001	44.5179	123.614	137.128	52.5222	18.0779	45.6423	43.3934
1d0944	rplV	50S ribosomal protein L22 {ECO:0000255	130.025	21.2973	17.1052	49.1203	210.93	11.2814	31.3131	9.5772	24.6331
1d0198	1d0198	hypothetical protein	129.82	56.552	50.6734	104.948	154.692	87.805	25.2991	50.9726	50.3742
1c0391	1c0391	hypothetical protein	129.753	98.465	116.797	63.2736	196.233	58.1281	138.802	97.1517	136.442
1c0562	1c0562	hypothetical protein	129.673	73.7375	30.545	134.198	125.149	98.0675	49.4076	56.1956	4.89442
1d0148	1d0148	hypothetical protein	128.988	97.2145	100.58	84.5367	173.44	95.5244	98.9046	110.268	90.8926
1d0771	rbsK	Sugar kinases, ribokinase family	128.444	128.053	166.654	110.158	146.729	101.2	154.905	170.035	163.273
1c0255	hisS	Histidyl-tRNA synthetase {ECO:0000255	128.38	44.3659	34.5817	158.857	97.9022	42.5655	46.1663	34.1994	34.9639
1c0558	purA	IMP--aspartate ligase {ECO:0000255	128.248	51.6701	116.696	60.7721	195.724	62.8088	40.5314	131.08	102.313
1d0077	1d0077	hypothetical protein	127.85	23.3903	86.8152	106.661	149.038	24.4969	22.2838	73.5294	100.101
1c0596	trkA	Trk system potassium uptake protein trkA (K(+)-uptake protein trkA)	127.529	63.2869	45.7856	26.1669	228.891	96.1559	30.418	47.83	43.7411
1d0239	pfkA	6-phosphofructokinase	127.197	134.578	304.607	54.4984	199.896	120.994	148.163	316.782	292.433
1d0510	uppS	Undecaprenyl pyrophosphate synthetase	126.887	26.1966	37.7737	57.8782	195.896	14.9545	37.4387	34.9122	40.6351
1d0521	1d0521	Exopolyphosphatase-related proteins	126.753	37.9525	38.66	103.698	149.807	67.4798	8.42521	43.8068	33.5132
1c0604	dinG	Probable ATP-dependent helicase dinG homolog	126.641	129.732	105.022	110.27	143.012	126.168	133.297	100.854	109.19
1c0620	1c0620	Cellobiose phosphorylase	126.496	97.3878	94.9814	94.413	158.578	102.559	92.217	98.7882	91.1745
1c0236	1c0236	hypothetical protein	126.487	72.5303	66.2299	49.8702	203.103	78.5395	66.5211	58.8614	73.5985
1c0498	1c0498	hypothetical protein	126.266	47.2159	62.0073	89.3321	163.201	65.87	28.5618	69.7845	54.2301
1c0311	valS	Valyl-tRNA synthetase {ECO:0000255	126.072	57.5414	49.2452	96.9647	155.179	49.1793	65.9035	48.4457	50.0447
1d0615	1d0615	Adenine specific DNA methylase Mod	125.464	32.3046	47.7261	61.4642	189.464	45.3213	19.2878	51.326	44.1262
1c0400	1c0400	hypothetical protein	125.396	23.0633	40.6214	155.548	95.2441	30.9613	15.1654	50.0409	31.202
1d0210	glnQ	ABC-type polar amino acid transport system, ATPase component	125.129	65.0711	35.5152	112.897	137.36	70.873	59.2692	30.2666	40.7638
1d0240	araD	Ribulose-5-phosphate 4-epimerase and related epimerases and aldolases	125.065	36.9347	49.1371	100.896	149.235	60.249	13.6205	48.6884	49.5858
1d0730	1d0730	hypothetical protein	125.012	880.336	1007.81	0	250.023	1010.24	750.428	1044.26	971.353
1d0851	1d0851	hypothetical protein	124.506	52.2525	31.1612	68.7081	180.304	71.0108	33.4941	39.3517	22.9708
1d0665	1d0665	hypothetical protein	124.061	25.4074	73.4718	89.5954	158.526	20.5774	30.2374	72.0588	74.8847
1d0141	hisH	ImGP synthase subunit HisH {ECO:0000255	123.995	93.9242	47.6569	100.648	147.341	75.6521	112.196	52.1816	43.1321
1d0627	1d0627	UPF0210 protein Daud_1353 {ECO:0000255	123.946	45.2931	61.1055	102.559	145.333	51.8203	38.7659	67.4877	54.7234
1d0946	rplP	50S ribosomal protein L16 {ECO:0000255	123.868	30.6832	41.6221	0	247.736	36.2277	25.1387	27.8717	55.3725
1d0884	cheA	Chemotaxis protein histidine kinase and related kinases	123.832	20.5661	35.0026	40.0184	207.646	30.199	10.9332	33.0215	36.9836
1d0852	topA	Zn-finger domain associated with topoisomerase type I	123.723	80.3768	55.7807	87.2229	160.224	88.1429	72.6107	59.947	51.6144
1d0479	pta	BioD-like N-terminal domain of phosphotransacetylase	123.711	42.8407	43.507	52.1389	195.284	59.8736	25.8079	47.2707	39.7433
1d0821	1d0821	hypothetical protein	123.684	59.6501	44.676	149.787	97.5806	66.1566	53.1436	67.3951	21.9569
1d0068	1d0068	Probable 2,3-bisphosphoglycerate-independent phosphoglyce...	123.348	67.3335	69.755	36.5994	210.097	67.2463	67.4207	78.9415	60.5685
1c0518	tar	Methyl-accepting chemotaxis protein	123.276	69.4196	65.1991	127.423	119.129	64.067	74.7722	62.698	67.7002
1d0926	nusG	Transcription antiterminator	123.128	21.1062	28.4443	21.0912	225.164	33.9081	8.30438	26.2155	30.6731
1d0540	1d0540	Predicted HD superfamily hydrolase	122.908	184.888	103.645	29.2795	216.537	184.087	185.69	108.912	98.3779
1d0292	ccdA	Cytochrome c biogenesis protein	122.884	26.0532	54.0242	112.897	132.871	22.4719	29.6346	42.3733	65.6751
1d0605	rfaG	Glycosyltransferase	122.861	94.2374	93.7253	81.1553	164.566	77.8449	110.63	83.0718	104.379
1d0469	1d0469	Uncharacterized protein conserved in bacteria	122.787	45.0797	48.6643	47.4552	198.12	58.1281	32.0312	49.7324	47.5962
1c0651	1c0651	Uncharacterized conserved protein	122.739	73.7031	69.6146	52.4318	193.045	93.9276	53.4786	74.3712	64.858
1d0862	draG	ADP-ribosylglycohydrolase	122.529	97.1784	132.804	105.337	139.721	70.6427	123.714	124.46	141.148
1d0911	sms	Predicted ATP-dependent serine protease	122.12	101.844	72.9033	41.2958	202.945	78.7205	124.967	85.7498	60.0569
1d0316	ompR	Response regulators consisting of a CheY-like receiver domain and a winged-helix DNA-binding domain	122.072	76.0907	85.2978	48.4824	195.661	63.098	89.0833	77.395	93.2006
1d0353	proB	Gamma-glutamyl kinase {ECO:0000255	121.846	11.9119	42.4189	113.275	130.417	0	23.8238	42.851	41.9868
1d0465	nlpD	Membrane proteins related to metalloendopeptidases	121.204	30.3306	35.5027	69.5	172.908	44.4657	16.1954	32.6669	38.3386
1d0623	tldD	Predicted Zn-dependent proteases and their inactivated homologs	121.107	48.2474	51.9885	58.3303	183.884	20.0951	76.3998	96.8729	7.10402
1d0539	recA	Recombinase A {ECO:0000255	121.091	89.9536	125.25	27.3691	214.813	95.5449	84.3623	128.07	122.429
1d0943	rpsS	30S ribosomal protein S19 {ECO:0000255	120.901	52.729	56.0644	0	241.801	78.3636	27.0945	55.764	56.3648
1d0715	1d0715	hypothetical protein	120.724	48.8968	42.7689	122.801	118.648	53.5869	44.2068	44.8931	40.6446
1c0694	napH	Polyferredoxin	120.638	38.2432	73.1099	93.5513	147.724	39.9024	36.584	65.7947	80.4251
1c0580	apaH	Diadenosine tetraphosphatase and related serine/threonine protein phosphatases	120.609	66.2982	53.646	79.1479	162.069	62.1078	70.4887	53.0468	54.2451
1c0654	baeS	Signal transduction histidine kinase	120.095	53.1921	59.9787	72.8095	167.381	68.4088	37.9755	67.5116	52.4458
1c0213	dxs	1-deoxyxylulose-5-phosphate synthase {ECO:0000255	120.016	82.5001	67.0654	63.5674	176.465	73.6612	91.339	69.5051	64.6257
1c0082	1c0082	hypothetical protein	119.648	45.123	97.0095	41.2502	198.047	45.0011	45.2448	95.7587	98.2603
1c0303	pheT	Phenylalanyl-tRNA synthetase beta chain	119.573	69.8843	50.9948	126.586	112.56	86.6905	53.0781	53.513	48.4765
1d0452	rnhA	Ribonuclease HI	119.381	51.8321	187.266	0	238.761	70.5091	33.1551	188.551	185.98
1d0777	recR	Recombination protein RecR {ECO:0000255	119.16	90.977	52.8406	101.645	136.675	103.99	77.9637	47.2933	58.3878
1d0185	atpA	F-ATPase subunit alpha {ECO:0000255	118.743	34.5376	34.5966	46.2199	191.266	53.0765	15.9986	33.5339	35.6594
1c0539	zntA	Cation transport ATPase	118.695	66.1813	98.4561	51.8492	185.54	68.2015	64.1612	104.252	92.6603
1c0390	ccmC	ABC-type transport system involved in cytochrome c biogenesis, permease component	118.585	61.592	78.0375	0	237.169	71.4492	51.7347	80.1049	75.97
1c0682	cbiM	ABC-type Co2+ transport system, permease component	118.515	40.5172	48.6217	65.5983	171.432	26.023	55.0113	55.3749	41.8684
1c0662	ushA	Mannosylglucosyl-3-phosphoglycerate phosphatase {ECO:0000...	118.485	40.9598	69.1812	64.7586	172.212	45.4942	36.4255	67.6805	70.682
1c0239	1c0239	Uncharacterized distant relative of homeotic protein bithoraxoid	118.191	33.9905	52.8033	39.9267	196.455	29.8023	38.1786	52.5465	53.06
1d0186	atpG	F-ATPase gamma subunit {ECO:0000255	118.143	21.2054	32.7127	50.6189	185.666	20.3448	22.0659	25.4445	39.9808
1d0783	1d0783	HD-GYP domain	118.133	122.264	99.8243	72.6646	163.601	90.7457	153.783	93.9719	105.677
1c0675	hypE	Hydrogenase expression/formation protein hypE	118.003	68.967	52.347	60.9267	175.08	72.5092	65.4247	44.1418	60.5522
1d0072	1d0072	Uncharacterized conserved protein	117.997	22.8906	50.7916	105.024	130.97	32.8922	12.8889	51.309	50.2742
1d0150	smpB	Small protein B {ECO:0000255	117.919	17.6651	41.7187	71.3339	164.505	27.3054	8.0248	32.1629	51.2745
1d0717	1d0717	hypothetical protein	117.874	43.3345	47.9866	25.0546	210.694	34.5258	52.1432	59.5361	36.4372
1c0175	1c0175	Cell division protein SepF {ECO:0000255	117.695	57.1121	58.8663	62.219	173.171	52.3961	61.8281	47.0081	70.7244
1c0212	1c0212	Predicted rRNA methylase	117.263	62.5638	81.0356	112.699	121.827	74.415	50.7127	69.525	92.5462
1c0262	spoT	GTP pyrophosphokinase	117.217	22.5898	29.329	113.199	121.236	9.95679	35.2228	47.5462	11.1119
1d0228	trpD	Anthranilate phosphoribosyltransferase {ECO:0000255	116.839	60.3796	70.2589	52.5795	181.098	120.759	0	59.1072	81.4107
1c0374	rfaG	Glycosyltransferase	116.811	14.2924	15.0815	66.4936	167.128	13.0899	15.4949	27.7812	2.38183
1d0375	tlyC	Hemolysins and related proteins containing CBS domains	116.692	45.6918	85.3704	88.6621	144.722	53.5869	37.7968	88.3676	82.3732
1c0373	rfaG	Glycosyltransferase	116.453	83.6454	80.743	141.965	90.941	111.098	56.1924	69.1986	92.2875
1d0775	dnaX	DNA polymerase III, gamma/tau subunits	116.328	36.3609	50.4437	103.873	128.783	41.2068	31.515	51.322	49.5653
1c0107	1c0107	Uncharacterized vancomycin resistance protein	116.164	82.9862	53.863	126.823	105.506	102.319	63.6531	53.2586	54.4675
1d0246	livH	Branched-chain amino acid ABC-type transport system, permease components	116.01	21.6811	57.5504	27.2492	204.772	21.9041	21.458	54.2912	60.8096
1c0122	fucI	L-fucose isomerase and related proteins	115.906	80.4036	59.8005	143.582	88.229	84.9396	75.8677	63.3066	56.2944
1c0234	pilT	Tfp pilus assembly protein, pilus retraction ATPase PilT	115.869	89.6778	69.8776	47.4552	184.283	98.0912	81.2643	59.3705	80.3847
1d0854	1d0854	hypothetical protein	115.838	24.5675	44.9873	119.461	112.215	20.5774	28.5576	48.0392	41.9354
1c0150	1c0150	hypothetical protein	115.777	102.887	149.894	0	231.555	205.774	0	153.762	146.025
1d0583	mrcB	Membrane carboxypeptidase (penicillin-binding protein)	115.255	74.0696	95.0498	32.9693	197.54	87.3699	60.7693	87.3366	102.763
1d0054	1d0054	hypothetical protein	115.238	16.7646	35.2938	130.347	100.13	33.5292	0	36.5967	33.991
1c0585	1c0585	Uncharacterized FAD-dependent dehydrogenases	115.14	43.5084	38.9547	40.402	189.878	54.7468	32.27	45.4917	32.4176
1d0839	1d0839	Uncharacterized conserved protein	114.845	35.036	64.2868	124.438	105.252	35.075	34.997	66.1697	62.4039
1d0909	lysU	Lysyl-tRNA synthetase {ECO:0000255	114.788	30.1762	37.506	93.1423	136.433	41.0726	19.2798	45.4917	29.5204
1c0678	hypF	Hydrogenase maturation factor	114.404	88.0341	93.7666	74.1991	154.609	89.4668	86.6013	91.718	95.8152
1d0526	pqqL	Predicted Zn-dependent peptidases	114.342	83.3245	92.753	4.44422	224.239	81.6562	84.9928	101.706	83.7995
1c0415	1c0415	Predicted membrane protein/domain	114.293	59.0648	65.4208	56.3493	172.238	42.0606	76.069	62.315	68.5266
1d0543	1d0543	Predicted metal-dependent phosphoesterases (PHP family)	114.293	57.892	70.002	112.524	116.061	91.2117	24.5724	71.6252	68.3787
1c0291	tyrS	Tyrosyl-tRNA synthetase {ECO:0000255	114.197	20.3822	56.2095	41.4794	186.915	15.8776	24.8868	56.9489	55.4701
1c0388	1c0388	Predicted ATPase (AAA+ superfamily)	114.181	32.1591	32.5072	64.6832	163.68	44.5673	19.7508	23.3089	41.7056
1c0467	1c0467	hypothetical protein	114.095	11.8915	25.0743	52.5795	175.61	6.03796	17.745	21.144	29.0046
1d0420	deoB	Phosphodeoxyribomutase {ECO:0000255	114.057	41.6989	65.4758	23.1011	205.013	37.1394	46.2584	62.8326	68.1191
1d0697	1d0697	hypothetical protein	113.988	45.1088	71.8133	87.8386	140.138	63.0434	27.1742	69.8431	73.7834
1c0198	1c0198	Uncharacterized ABC-type transport system, permease component	113.53	36.9773	61.6097	35.2183	191.842	32.3543	41.6002	75.5334	47.686
1c0387	hemA	Glutamyl-tRNA reductase {ECO:0000255	113.528	31.2331	43.774	32.6039	194.453	28.0805	34.3857	47.0809	40.4672
1c0025	ugd	Predicted UDP-glucose 6-dehydrogenase	113.206	42.8718	41.3417	59.9358	166.476	71.7769	13.9667	36.3099	46.3735
1d0754	1d0754	hypothetical protein	112.675	29.6248	26.3723	59.0687	166.282	37.9856	21.264	30.2318	22.5128
1d0276	dppC	ABC-type dipeptide/oligopeptide/nickel transport systems, permease components	112.655	32.4885	35.4779	89.1674	136.142	38.2276	26.7493	25.6434	45.3124
1d0129	leuB	Beta-IPM dehydrogenase {ECO:0000255	112.597	54.8892	43.431	55.643	169.551	53.4417	56.3367	44.752	42.11
1d0752	zwf	Glucose-6-phosphate 1-dehydrogenase	112.173	102.201	170.706	25.1621	199.183	105.072	99.3298	188.155	153.257
1d0825	1d0825	Protein containing tetrapyrrole methyltransferase domain and MazG-like (predicted pyrophosphatase) domain	112.072	42.5465	39.6321	72.5253	151.62	45.5872	39.5058	36.0026	43.2616
1c0342	tmk	dTMP kinase {ECO:0000255	112.037	95.5516	106.033	8.64153	215.433	75.4186	115.685	114.993	97.0727
1d0871	moeA	Molybdopterin biosynthesis enzyme	111.945	42.7961	63.6471	86.4996	137.39	28.2311	57.361	62.9117	64.3826
1d0025	manB	Phosphoglucosamine mutase {ECO:0000255	111.854	24.9819	36.5624	121.369	102.338	25.9524	24.0114	37.0257	36.0991
1d0050	1d0050	Uncharacterized conserved protein	111.119	17.6893	26.7422	76.1866	146.052	23.747	11.6317	19.0986	34.3858
1c0511	cysK	Cysteine synthase	110.948	61.7218	85.326	29.1652	192.73	68.3233	55.1203	82.3115	88.3405
1d0916	glnS	Glutamyl-tRNA synthetase 1 {ECO:0000255	110.67	57.5724	68.749	11.5458	209.795	62.7574	52.3873	64.1574	73.3407
1c0034	1c0034	Predicted membrane protein	110.593	47.0903	79.5475	77.5047	143.682	57.8516	36.3291	76.5016	82.5934
1d0593	ompR	Transcriptional regulatory protein yycF	110.243	75.3661	83.7607	49.4456	171.041	95.1078	55.6244	86.3137	81.2077
1d0903	1d0903	Predicted HD-superfamily hydrolase	109.765	32.44	88.1037	99.1616	120.369	28.1331	36.7469	92.5472	83.6602
1d0893	1d0893	hypothetical protein	109.49	74.3179	102.663	83.8908	135.09	77.0688	71.567	113.474	91.8529
1c0530	purL	Phosphoribosylformylglycinamidine synthase subunit I {ECO...	109.485	60.605	55.5913	24.0331	194.937	66.2361	54.9739	66.1875	44.9951
1d0287	rhaT	Permeases of the drug/metabolite transporter (DMT) superfamily	109.403	121.255	157.349	74.1238	144.681	145.478	97.0315	155.197	159.502
1d0675	acr3	Arsenite efflux pump ACR3 and related permeases	108.489	40.2021	47.676	53.4695	163.508	54.7033	25.7009	45.1363	50.2156
1c0565	1c0565	Uncharacterized conserved protein	108.475	40.2045	45.8702	57.7603	159.19	35.6082	44.8008	43.5653	48.175
1c0440	hepA	Superfamily II DNA/RNA helicases, SNF2 family	108.444	29.045	59.0594	32.2149	184.674	36.5588	21.5312	52.9274	65.1915
1d0207	hisJ	ABC-type amino acid transport/signal transduction systems, periplasmic component/domain	108.413	34.0225	40.9062	68.123	148.703	29.727	38.3179	29.8851	51.9273
1c0484	ispE	4-(cytidine-5'-diphospho)-2-C-methyl-D-erythritol kinase ...	107.976	33.5529	60.814	50.278	165.675	31.7552	35.3505	61.1151	60.5129
1c0035	uvrD	Superfamily I DNA and RNA helicases	107.469	68.9872	77.8686	66.1905	148.748	76.6178	61.3565	73.9482	81.7889
1c0022	1c0022	Uncharacterized conserved protein	107.432	63.8466	63.208	68.7081	146.156	71.0108	56.6823	77.0289	49.3871
1c0324	lysA	Diaminopimelate decarboxylase	107.312	26.6508	38.6541	49.2282	165.396	33.9187	19.383	44.3919	32.9163
1d0857	hemG	Flavodoxin	107.035	43.9691	43.7067	116.661	97.4088	41.408	46.5301	39.5468	47.8666
1c0300	argB	Acetylglutamate kinase	106.979	43.1294	52.1612	87.6913	126.267	14.3857	71.8731	64.1158	40.2065
1c0249	perM	Predicted permease	106.784	11.9542	21.2635	76.7741	136.794	7.71431	16.194	18.9451	23.5819
1c0092	spr	Cell wall-associated hydrolases (invasion-associated proteins)	106.771	32.5681	25.8346	80.3787	133.163	41.0234	24.1128	17.6308	34.0385
1d0758	rbsB	ABC-type sugar transport system, periplasmic component	106.754	69.621	59.7907	50.9065	162.601	88.3372	50.9048	58.3121	61.2693
1c0279	ruvC	Holliday junction resolvasome, endonuclease subunit	106.402	45.0369	28.4618	116.661	96.1437	87.6876	2.38616	27.1399	29.7837
1c0443	mesJ	tRNA(Ile)-lysidine synthetase {ECO:0000255	106.343	38.479	50.3121	12.0166	200.67	39.5577	37.4003	49.2013	51.423
1d0478	1d0478	Acyl-CoA synthetase (NDP forming)	106.242	84.3376	117.979	42.7867	169.698	113.623	55.0526	116.336	119.622
1c0635	doc	Prophage maintenance system killer protein	105.992	47.5034	52.0104	55.3058	156.679	82.5635	12.4434	59.6447	44.3761
1d0108	1d0108	Uncharacterized conserved protein	105.717	45.3086	43.5121	106.458	104.975	58.6807	31.9364	49.2971	37.7271
1d0830	gppA	Exopolyphosphatase	105.644	34.0511	44.1428	82.836	128.451	49.4648	18.6375	50.0678	38.2178
1d0245	livF	ABC-type branched-chain amino acid transport systems, ATPase component	105.432	4.23457	23.9214	14.9326	195.931	3.42956	5.03957	22.3819	25.4608
1c0528	purL	Phosphoribosylformylglycinamidine synthase II	105.421	47.1097	52.1655	88.6498	122.192	55.9905	38.2289	54.1939	50.1372
1d0367	hrcA	Heat-inducible transcription repressor hrcA	105.345	62.2568	72.8033	38.3167	172.373	66.63	57.8836	72.0396	73.5671
1c0631	ompR	Response regulators consisting of a CheY-like receiver domain and a winged-helix DNA-binding domain	105.283	36.4539	39.5709	0	210.567	63.1411	9.76661	48.6655	30.4763
1d0010	adk	Adenylate monophosphate kinase {ECO:0000255	105.273	21.6314	42.2086	25.6868	184.86	43.2628	0	43.1962	41.2209
1d0831	metH	Methionine synthase I, cobalamin-binding domain	104.722	8.00165	2.69739	15.5548	193.89	12.5036	3.4997	2.27458	3.1202
1d0001	rplE	50S ribosomal protein L5 {ECO:0000255	104.651	22.8636	35.8632	30.9376	178.365	23.6848	22.0423	32.4223	39.3041
1d0355	nadD	Nicotinate mononucleotide adenylyltransferase {ECO:000025...	104.616	7.75796	70.9821	18.3899	190.842	0	15.5159	82.0195	59.9446
1c0608	1c0608	hypothetical protein	104.441	40.5793	10.3138	147.361	61.5213	50.7665	30.3922	10.7743	9.85325
1d0528	lysC	Aspartokinases	104.288	74.5273	77.6375	13.6912	194.886	83.8523	65.2023	79.7495	75.5255
1d0706	aprE	Thermophilic serine proteinase precursor	104.217	63.1847	65.178	76.9994	131.436	74.3966	51.9728	66.9757	63.3804
1d0536	pgsA	Phosphatidylglycerophosphate synthase	104.16	95.5252	109.609	0	208.32	91.2569	99.7935	103.37	115.849
1d0005	rplR	50S ribosomal protein L18 {ECO:0000255	104.084	29.4833	36.302	0	208.167	45.3092	13.6574	42.163	30.4409
1c0292	1c0292	Collagenase and related proteases	103.822	82.119	75.4479	72.0594	135.586	90.7574	73.4807	76.9903	73.9055
1c0080	1c0080	hypothetical protein	103.799	35.367	27.9781	176.092	31.5069	68.753	1.98096	34.7625	21.1938
1c0438	1c0438	Uncharacterized conserved protein	103.244	24.3419	31.5339	0	206.489	34.5722	14.1117	29.3495	33.7182
1c0083	paaK	Coenzyme F390 synthetase	103.135	485.971	619.135	0	206.27	675.071	296.871	620.256	618.014
1c0377	1c0377	Uncharacterized protein conserved in bacteria	103.045	10.6369	43.3799	53.055	153.035	5.5387	15.7351	52.8973	33.8626
1d0535	miaB	Ribosome maturation factor RimO {ECO:0000255	102.898	77.3649	70.2074	25.9246	179.871	55.5716	99.1582	86.2447	54.1701
1c0639	1c0639	FOG: FHA domain	102.817	58.3064	56.1016	79.9959	125.637	55.1179	61.4948	50.6907	61.5124
1c0462	1c0462	hypothetical protein	102.761	57.2892	74.5796	0	205.522	74.1972	40.3812	102.356	46.8029
1d0888	1d0888	Putative peptidoglycan-binding domain-containing protein	102.617	82.1506	88.6998	0	205.235	89.8104	74.4909	72.8121	104.588
1c0331	nuoL	NDH-1 subunit L	102.592	11.2431	33.1816	108.761	96.4226	0	22.4863	34.8173	31.5459
1d0763	urh1	Inosine-uridine nucleoside N-ribohydrolase	102.454	21.9006	18.0507	66.0202	138.887	28.9473	14.854	16.2366	19.8649
1d0794	lytS	Autolysin sensor kinase	101.839	80.1583	52.9001	54.3002	149.377	35.8545	124.462	40.4462	65.3539
1c0626	1c0626	5-formyltetrahydrofolate cyclo-ligase	101.743	78.4245	60.9965	61.4004	142.085	104.353	52.4955	72.7268	49.2662
1d0275	dppB	ABC-type dipeptide/oligopeptide/nickel transport systems, permease components	100.988	22.7095	36.4162	28.8051	173.171	34.4015	11.0176	34.1188	38.7135
1c0439	1c0439	Adenine specific DNA methylase Mod	100.975	42.4066	48.4432	40.9111	161.039	59.1168	25.6964	43.3729	53.5135
1c0586	dnaB	Replicative DNA helicase	100.757	36.5895	58.6561	0	201.514	42.5856	30.5934	55.7349	61.5774
1c0583	thrC	Threonine synthase	100.679	49.0291	49.852	24.5064	176.852	54.4077	43.6506	51.3648	48.3391
1d0278	appF	Oligopeptide transport ATP-binding protein appF	100.584	34.5892	40.928	56.2785	144.889	54.9333	14.245	40.4625	41.3935
1c0556	hemN	Coproporphyrinogen III oxidase and related Fe-S oxidoreductases	100.516	55.8021	64.1718	50.1093	150.923	59.4611	52.1432	62.5892	65.7545
1c0004	proP	Permeases of the major facilitator superfamily	100.201	38.4937	76.2797	68.0299	132.372	45.8967	31.0908	85.1803	67.3792
1d0805	1d0805	hypothetical protein	100.172	19.5022	32.1342	83.4222	116.922	14.3697	24.6348	38.1215	26.1469
1d0679	1d0679	Predicted integral membrane protein	100.083	11.1487	31.206	63.0066	137.159	7.23536	15.062	33.9748	28.4372
1c0126	1c0126	hypothetical protein	99.9857	231.403	162.881	0	199.971	289.766	173.041	214.822	110.94
1d0123	nrfG	FOG: TPR repeat	99.7768	23.9545	24.8031	59.7303	139.823	42.8695	5.03957	19.6524	29.9539
1c0246	1c0246	Predicted periplasmic solute-binding protein	99.7652	37.733	46.272	17.177	182.353	68.3808	7.08529	36.8399	55.7041
1c0341	holB	ATPase involved in DNA replication	99.5553	45.8331	42.0559	75.417	123.694	48.7153	42.9509	38.2544	45.8574
1c0114	srmB	Superfamily II DNA and RNA helicases	99.5071	32.5393	50.9126	82.7544	116.26	46.4596	18.6191	54.7917	47.0335
1c0133	pyrF	OMP decarboxylase {ECO:0000255	99.5051	104.216	67.9614	112.638	86.3723	101.63	106.801	57.649	78.2739
1c0380	galU	UDP-glucose pyrophosphorylase	99.3689	30.5915	27.5317	25.4822	173.256	48.2831	12.8999	23.755	31.3084
1d0059	uvrD	Superfamily I DNA and RNA helicases	99.1721	47.712	48.7874	56.3401	142.004	57.947	37.4771	54.0885	43.4862
1d0288	rpoN	RNA polymerase sigma-54 factor	98.9289	76.4445	76.7829	0	197.858	55.8384	97.0506	75.6921	77.8738
1d0269	1d0269	Putative sporulation transcription regulator WhiA {ECO:00...	98.8763	34.8458	36.2261	64.1634	133.589	38.8505	30.8411	28.5745	43.8777
1d0290	atoC	Response regulator containing CheY-like receiver, AAA-type ATPase, and DNA-binding domains	98.8491	32.3463	88.6385	29.1002	168.598	30.5529	34.1396	95.1374	82.1397
1c0315	rho	Transcription termination factor rho	98.5559	31.7819	47.2941	0	197.112	35.3405	28.2234	41.5784	53.0098
1c0433	1c0433	Uncharacterized conserved protein	98.5494	92.6172	38.8368	0	197.099	137.042	48.1926	46.9832	30.6904
1d0922	crp	cAMP-binding proteins - catabolite gene activator and regulatory subunit of cAMP-dependent protein kinases	98.4171	20.034	31.4812	0	196.834	24.8519	15.2161	27.6906	35.2718
1d0915	ispF	2-C-methyl-D-erythritol 2,4-cyclodiphosphate synthase {EC...	97.7747	34.8634	28.2438	56.5628	138.987	49.3649	20.3619	28.1221	28.3654
1c0222	aroB	3-dehydroquinate synthase {ECO:0000255	97.5991	39.785	41.5395	63.6331	131.565	40.5961	38.974	33.0849	49.994
1d0462	sun	tRNA and rRNA cytosine-C5-methylases	97.5311	36.321	47.5673	48.1978	146.864	33.2088	39.4333	38.4437	56.6909
1d0247	livM	ABC-type branched-chain amino acid transport system, permease component	97.2411	24.4023	34.511	0	194.482	36.155	12.6495	31.2413	37.7807
1d0372	1d0372	Predicted membrane-associated HD superfamily hydrolase	96.7847	43.1654	41.4847	19.3227	174.247	55.0292	31.3017	39.558	43.4114
1d0530	1d0530	Predicted hydrolase of the metallo-beta-lactamase superfamily	96.7139	120.402	89.0823	6.69022	186.738	109.094	131.709	95.6304	82.5342
1d0520	rbfA	Ribosome-binding factor A	96.5824	28.6552	26.9502	72.3477	120.817	16.6161	40.6942	30.6804	23.2201
1d0194	wecE	Predicted pyridoxal phosphate-dependent enzyme apparently involved in regulation of cell wall biogenesis	96.2667	22.9891	41.4301	58.9443	133.589	32.7162	13.262	39.5059	43.3543
1c0178	pstB	Phosphate-transporting ATPase 1 {ECO:0000255	96.0631	60.2245	48.8029	40.7252	151.401	102.887	17.5621	56.0788	41.527
1d0345	1d0345	Uncharacterized protein/domain associated with GTPases	96.0263	32.9598	155.368	35.2183	156.834	59.3163	6.60321	136.475	174.26
1d0305	erfK	Uncharacterized protein conserved in bacteria	95.9481	24.404	25.4941	36.7435	155.153	42.1944	6.61361	27.4025	23.5857
1d0320	crp	cAMP-binding proteins - catabolite gene activator and regulatory subunit of cAMP-dependent protein kinases	95.4208	88.8251	102.906	0	190.842	84.4149	93.2353	113.29	92.5216
1c0097	soxR	Predicted transcriptional regulators	95.2674	43.5453	97.3174	7.77738	182.757	23.221	63.8696	80.7477	113.887
1c0123	1c0123	HD-GYP domain	95.0559	27.1545	34.828	104.25	85.8618	34.2044	20.1047	36.2966	33.3595
1d0329	1d0329	hypothetical protein	94.7642	18.6386	17.1199	102.706	86.8223	29.742	7.53524	16.3248	17.915
1d0811	ibpA	Molecular chaperone (small heat shock protein)	94.5893	69.7643	42.3634	0	189.179	44.8309	94.6978	32.1118	52.6151
1d0804	wcaG	Nucleoside-diphosphate-sugar epimerases	94.4959	37.8793	30.5052	23.778	165.214	75.0899	0.668733	60.4141	0.596216
1d0778	porG	Pyruvate:ferredoxin oxidoreductase and related 2-oxoacid:ferredoxin oxidoreductases, gamma subunit	94.4624	30.2816	35.3604	19.3427	169.582	35.5395	25.0238	36.7705	33.9503
1c0395	ccmF	Cytochrome c biogenesis factor	94.4225	27.486	40.6969	0	188.845	35.0466	19.9253	42.0383	39.3555
1d0764	rbsK	Sugar kinases, ribokinase family	94.3312	27.8806	43.4604	78.7838	109.879	26.4455	29.3157	47.4118	39.509
1c0376	rfaG	Glycosyltransferase	93.3816	33.4252	47.5747	65.1671	121.596	42.7626	24.0877	51.7312	43.4182
1c0154	1c0154	hypothetical protein	93.1889	18.996	27.7188	84.0798	102.298	7.72423	30.2677	36.8852	18.5525
1c0317	1c0317	2-phosphoglycerate kinase	93.153	28.6665	34.2934	11.6661	174.64	44.2092	13.1239	35.8247	32.7621
1c0394	ccmA	ABC-type multidrug transport system, ATPase component	93.0304	32.1702	45.0556	61.4509	124.61	19.4059	44.9345	47.7382	42.373
1d0387	dnaG	DNA primase	92.8315	30.449	50.0852	30.6498	155.013	44.3478	16.5503	52.2146	47.9557
1d0190	fabA	Beta-hydroxyacyl-ACP dehydratase {ECO:0000255	92.6269	41.9583	29.2206	39.4346	145.819	54.3416	29.575	30.7549	27.6862
1d0899	1d0899	Predicted membrane protein	92.4076	16.0787	44.7952	16.5917	168.223	20.9584	11.199	45.4917	44.0988
1c0544	purB	Adenylosuccinate lyase	92.144	36.3174	40.8743	54.2851	130.003	37.4029	35.2319	33.5845	48.1641
1d0640	1d0640	Uncharacterized protein conserved in archaea	92.106	31.3691	65.7071	62.219	121.993	30.3659	32.3722	65.11	66.3042
1d0663	1d0663	hypothetical protein	91.8289	67.3177	69.0459	87.0422	96.6156	79.9638	54.6715	74.0713	64.0206
1d0807	grpE	HSP-70 cofactor {ECO:0000255	91.6484	491.799	426.307	0	183.297	484.525	499.074	432.912	419.703
1d0106	degV	Hypothetical UPF0230 protein CPE0026	91.1922	56.0789	60.4543	32.4057	149.979	65.4951	46.6627	50.7043	70.2044
1d0682	1d0682	Predicted transcriptional regulator	91.0824	42.2508	39.4382	52.1712	129.994	50.5913	33.9102	52.1318	26.7445
1d0732	ebsC	Uncharacterized conserved protein	91.003	46.5665	49.969	33.1344	148.872	58.3431	34.7899	58.9508	40.9872
1d0284	trxA	Thioredoxin 1 (TRX-1)	90.4685	39.6131	64.1463	34.5661	146.371	71.4492	7.77712	74.5558	53.7367
1d0424	trpS	Tryptophanyl-tRNA synthetase	90.4088	47.3773	63.1892	0	180.818	59.7575	34.997	53.7629	72.6155
1d0799	dhlC	Predicted symporter	90.2333	52.0868	113.835	64.049	116.418	60.9419	43.2316	116.628	111.042
1c0297	argR	Arginine repressor {ECO:0000255	90.2236	43.8879	112.047	0	180.447	64.4444	23.3314	121.311	102.783
1d0772	indA	Pseudouridine-5'-phosphate glycosidase {ECO:0000255	89.9692	44.0761	56.3086	42.9803	136.958	54.9971	33.1551	61.5036	51.1137
1c0436	1c0436	Uncharacterized conserved protein	89.9427	30.6521	32.0188	38.6187	141.267	23.6521	37.652	29.1774	34.8601
1d0710	baeS	Signal transduction histidine kinase	89.5382	32.4655	76.8798	0	179.076	39.6428	25.2882	78.0696	75.6899
1d0570	wcaA	Glycosyltransferases involved in cell wall biogenesis	89.5355	36.0927	38.4751	31.9072	147.164	48.8541	23.3314	41.2147	35.7356
1d0598	opuBC	Periplasmic glycine betaine/choline-binding (lipo)protein of an ABC-type transport system (osmoprotectant binding protein)	89.4075	48.9112	90.2716	18.4201	160.395	54.9971	42.8253	92.4798	88.0634
1d0905	spoIVFB	Hypothetical protein sll0528	89.1197	29.5662	40.7699	60.0505	118.189	28.7329	30.3996	39.8815	41.6584
1d0716	1d0716	hypothetical protein	88.8345	129.204	98.6616	0	177.669	121.247	137.16	108.445	88.8783
1c0309	thrS	Threonyl-tRNA synthetase {ECO:0000255	88.828	44.0049	82.5677	58.3303	119.326	52.2472	35.7626	88.4956	76.6398
1d0810	clpA	Chaperone protein ClpB	88.8269	68.2894	90.3262	53.7607	123.893	54.3277	82.2511	87.2623	93.3902
1c0669	1c0669	hypothetical protein	88.7437	29.6273	46.1771	63.6331	113.854	38.9723	20.2824	43.4239	48.9303
1d0330	ndk	Nucleoside diphosphate kinase	88.5061	23.8964	12.7764	55.7185	121.294	38.3906	9.40219	10.1847	15.3681
1c0203	ald	Alanine dehydrogenase	88.4936	35.7279	55.8026	101.529	75.4583	57.3985	14.0574	68.523	43.0822
1d0326	1d0326	hypothetical protein	88.4227	32.6703	29.2186	82.4014	94.444	41.9644	23.3761	26.4568	31.9805
1d0395	1d0395	hypothetical protein	88.0665	14.3279	32.2589	12.3342	163.799	21.718	6.93774	32.766	31.7518
1c0096	1c0096	hypothetical protein	87.9714	52.3776	169.629	49.7752	126.168	57.1593	47.596	148.303	190.956
1d0559	salX	ABC-type antimicrobial peptide transport system, ATPase component	87.9155	37.985	60.0571	31.1095	144.722	64.3043	11.6657	54.59	65.5241
1d0949	rplN	50S ribosomal protein L14 {ECO:0000255	87.7923	37.2366	26.0314	0	175.585	52.2799	22.1932	15.5337	36.5291
1c0042	1c0042	Uncharacterized protein conserved in bacteria	87.6028	38.1607	50.1487	39.0638	136.142	41.7383	34.583	50.045	50.2525
1d0271	pgk	Phosphoglycerate kinase {ECO:0000255	87.5449	25.6755	17.9076	60.9684	114.121	34.4679	16.883	9.94416	25.871
1c0369	wcaJ	Sugar transferases involved in lipopolysaccharide synthesis	87.3063	43.8606	65.3912	41.0235	133.589	47.1093	40.6119	69.8872	60.8952
1c0625	maf	Maf-like protein EUBREC_3290 {ECO:0000255	87.0803	30.291	40.0983	0	174.161	41.9168	18.6651	39.4261	40.7706
1d0064	pstB	Phosphate-transporting ATPase 1 {ECO:0000255	86.6711	54.8669	167.744	45.3418	128	86.7804	22.9535	174.047	161.442
1d0762	1d0762	Uncharacterized membrane protein	86.6354	37.7126	39.8931	0	173.271	44.9438	30.4813	47.326	32.4601
1d0231	trpF	N-(5'-phosphoribosyl)anthranilate isomerase {ECO:0000255	86.6063	17.1042	37.1036	26.5389	146.674	18.2856	15.9228	34.2805	39.9267
1c0011	1c0011	hypothetical protein	86.5678	62.7528	83.7623	89.199	83.9365	85.739	39.7665	82.3681	85.1565
1c0519	purH	Inosinicase {ECO:0000255	86.0128	29.8511	44.2034	32.4935	139.532	59.7022	0	35.9006	52.5062
1d0124	1d0124	hypothetical protein	85.9448	29.6208	31.1363	27.2492	144.64	49.0235	10.2181	32.2094	30.0632
1d0699	1d0699	hypothetical protein	85.6767	22.9995	44.2275	9.42713	161.926	19.4861	26.5129	39.2883	49.1667
1c0093	apt	Adenine phosphoribosyltransferase {ECO:0000255	85.4346	63.8983	73.7132	21.5789	149.29	76.8182	50.9783	66.2654	81.1611
1d0808	dnaJ	Chaperone protein DnaJ {ECO:0000255	85.4034	63.7868	75.2961	34.8427	135.964	50.3002	77.2734	79.7014	70.8908
1c0410	1c0410	Uncharacterized conserved protein	85.3119	23.4057	32.542	0	170.624	32.2582	14.5532	31.3487	33.7352
1d0473	1d0473	N6-adenine-specific methylase	85.2327	55.3661	97.1699	0	170.465	13.3967	97.3355	90.9834	103.356
1d0181	atpB	F-ATPase subunit 6 {ECO:0000255	85.1926	21.4719	30.5197	34.1863	136.199	31.4062	11.5375	29.4946	31.5448
1d0039	1d0039	Uracil-DNA glycosylase	85.0874	21.4348	27.8752	25.4532	144.722	42.8695	0	21.7119	34.0385
1c0240	pulE	Type II secretory pathway, ATPase PulE/Tfp pilus assembly pathway, ATPase PilB	85.0841	55.7383	50.943	6.65444	163.514	51.963	59.5137	57.1687	44.7172
1d0277	dppD	ABC-type dipeptide/oligopeptide/nickel transport system, ATPase component	85.0754	35.4992	47.3545	44.0489	126.102	49.3189	21.6796	52.7382	41.9708
1c0189	murD	UDP-N-acetylmuramoyl-L-alanyl-D-glutamate synthetase {ECO...	84.6928	57.5196	69.766	0	169.386	48.9673	66.072	79.4144	60.1176
1d0787	baeS	Signal transduction histidine kinase	84.6337	26.2822	26.9845	44.9776	124.29	34.4333	18.131	31.7894	22.1797
1d0834	rtn	FOG: EAL domain	84.4213	32.7613	50.2584	40.5776	128.265	41.9376	23.585	54.3922	46.1246
1d0439	1d0439	Fe-S oxidoreductase, related to NifB/MoaA family	84.3861	98.6766	117.054	62.219	106.553	116.36	80.9931	108.855	125.254
1d0299	ubiX	3-polyprenyl-4-hydroxybenzoate decarboxylase	84.3199	37.5943	27.3451	0	168.64	67.9121	7.27661	39.8615	14.8287
1c0095	hpt	Hypoxanthine-guanine phosphoribosyltransferase	84.2177	41.5097	79.0135	71.7912	96.6442	54.1757	28.8437	75.7362	82.2909
1c0136	ubiB	Dihydroorotate dehydrogenase electron transfer subunit	84.1389	38.2557	40.5328	108.103	60.1753	54.6214	21.89	46.3699	34.6956
1d0069	cdc9	ATP-dependent DNA ligase	84.0073	46.3474	49.2866	28.7165	139.298	57.1593	35.5354	52.4904	46.0829
1c0242	1c0242	Predicted hydrolase of the HAD superfamily	83.9815	77.155	35.7708	0	167.963	100.28	54.0305	34.3183	37.2234
1c0574	1c0574	D-ornithine aminomutase E component {ECO:0000303	83.9694	57.0777	58.0897	64.45	103.489	73.4418	40.7137	59.991	56.1884
1d0192	mviM	Predicted dehydrogenases and related proteins	83.7601	60.0499	143.58	82.9587	84.5615	85.739	34.3607	160.462	126.699
1c0473	ntpI	Archaeal/vacuolar-type H+-ATPase subunit I	83.6796	25.1488	34.6752	66.5718	100.787	37.0477	13.2499	35.1952	34.1552
1c0002	baeS	Signal transduction histidine kinase	83.6712	58.0929	68.5085	70.076	97.2663	74.6193	41.5664	70.5665	66.4506
1d0215	dnrI	DNA-binding transcriptional activator of the SARP family	83.4146	3.35078	19.997	39.7143	127.115	0	6.70156	17.4223	22.5716
1d0620	1d0620	Multiheme cytochrome c domain-containing protein	82.8082	66.8434	77.6545	64.6618	100.955	87.4551	46.2316	78.0608	77.2483
1d0200	rfaG	Glycosyltransferase	82.7647	1.92392	37.9566	0	165.529	0	3.84784	35.7265	40.1868
1d0512	dxr	2-C-methyl-D-erythritol 4-phosphate synthase {ECO:0000255...	82.6027	35.7461	41.4009	54.1749	111.031	55.425	16.0672	36.3693	46.4325
1d0142	hisA	Phosphoribosylformimino-5-aminoimidazole carboxamide ribo...	82.4124	43.4921	48.1663	23.1393	141.685	53.144	33.8401	53.011	43.3217
1d0325	1d0325	Hypothetical protein ypjG	82.0616	27.9164	42.4868	65.4937	98.6294	28.2036	27.6292	43.0974	41.8763
1c0575	1c0575	D-ornithine aminomutase S component {ECO:0000303	82.0216	136.912	110.583	46.2786	117.765	152.346	121.477	83.4641	137.701
1c0507	porG	Pyruvate:ferredoxin oxidoreductase and related 2-oxoacid:ferredoxin oxidoreductases, gamma subunit	81.739	6.3371	30.9974	100.896	62.5823	9.26908	3.40512	34.672	27.3228
1c0698	spr	Cell wall-associated hydrolases (invasion-associated proteins)	81.5869	54.2798	51.6992	17.1245	146.049	80.6261	27.9334	47.5785	55.82
1c0703	1c0703	hypothetical protein	81.3645	47.4901	75.7649	55.1017	107.627	60.1122	34.8679	75.5397	75.99
1d0076	metF	5,10-methylenetetrahydrofolate reductase	80.3099	37.8561	34.3772	55.224	105.396	57.0748	18.6375	31.0905	37.6639
1d0154	cheR	Protein methyltransferase frzF	80.1745	36.7844	38.8972	39.4094	120.94	50.1927	23.3761	34.3152	43.4791
1c0613	yidC	Membrane protein YidC {ECO:0000255	80.0555	111.917	146.461	23.5282	136.583	160.31	63.524	159.985	132.936
1d0145	hisI	Phosphoribosyl-AMP cyclohydrolase {ECO:0000255	79.8464	65.647	42.722	0	159.693	118.261	13.0334	48.0016	37.4423
1c0281	pdx2	Pyridoxal 5'-phosphate synthase glutaminase subunit {ECO:...	79.5521	25.3857	31.9155	48.3568	110.747	35.5395	15.2319	31.8206	32.0103
1d0459	priA	Primosomal protein N' (replication factor Y) - superfamily II helicase	79.1469	38.6738	60.5392	57.9368	100.357	54.9609	22.3868	54.8847	66.1936
1c0120	1c0120	hypothetical protein	79.1187	32.1412	40.6958	39.2962	118.941	36.1006	28.1818	43.4565	37.935
1c0310	folC	Folylpolyglutamate synthase	79.0025	43.4908	32.7289	45.9335	112.071	49.8706	37.1109	35.7217	29.7361
1c0327	degQ	Protease Do	78.9116	43.991	63.9653	22.8187	135.005	59.7448	28.2372	59.7287	68.2018
1d0428	cobU	Adenosyl cobinamide kinase/adenosyl cobinamide phosphate guanylyltransferase	78.8221	24.4973	42.1982	76.5773	81.0669	26.3812	22.6135	36.3934	48.003
1c0162	1c0162	hypothetical protein	78.7222	72.3369	89.6951	0	157.444	33.6832	110.991	85.7843	93.6059
1d0297	ubiD	3-polyprenyl-4-hydroxybenzoate decarboxylase and related decarboxylases	78.5781	18.1554	31.1661	41.1469	116.009	26.6324	9.67854	37.1956	25.1366
1d0368	dnaJ	Chaperone protein DnaJ {ECO:0000255	78.4941	42.2087	33.1896	0	156.988	54.0179	30.3996	34.7591	31.6202
1d0324	wcaA	Glycosyltransferases involved in cell wall biogenesis	78.4289	33.2127	62.8564	24.0331	132.825	31.2782	35.1472	63.8446	61.8683
1d0522	truB	tRNA-uridine isomerase {ECO:0000255	78.2577	101.494	79.7252	0	156.515	132.994	69.9941	89.6321	69.8182
1c0047	crcB	Putative fluoride ion transporter CrcB {ECO:0000255	78.1465	51.0819	28.3115	44.0922	112.201	64.1355	38.0283	30.089	26.5339
1d0336	1d0336	Predicted NADH:ubiquinone oxidoreductase, subunit RnfB	78.0442	10.557	14.9592	89.5403	66.5481	9.4914	11.6226	10.5756	19.3429
1d0795	lytT	Response regulator of the LytR/AlgR family	77.8257	41.4294	85.9503	7.84274	147.809	39.6273	43.2316	87.734	84.1666
1c0550	rtcB	Uncharacterized conserved protein	77.8217	81.4657	131.297	19.2927	136.351	87.5114	75.4199	132.949	129.645
1d0038	nfnB	Nitroreductase	77.6681	14.8783	21.6979	0	155.336	22.4317	7.32496	23.8038	19.5919
1d0393	1d0393	hypothetical protein	77.5892	31.0289	78.7012	22.6709	132.507	41.6546	20.4031	84.2609	73.1414
1d0339	radC	UPF0758 protein Daud_1467	77.298	29.2955	35.0011	76.0142	78.5819	31.0367	27.5542	32.7293	37.2729
1c0523	ccmA	ABC-type multidrug transport system, ATPase component	77.1851	67.753	133.947	25.3094	129.061	82.8326	52.6735	134.625	133.269
1d0087	gatA	Glutamyl-tRNA(Gln) amidotransferase subunit A {ECO:000025...	76.9996	36.3224	26.2959	33.7332	120.266	47.3458	25.2991	27.4046	25.1871
1d0303	1d0303	hypothetical protein	76.7141	29.1077	37.3761	47.405	106.023	43.55	14.6654	35.5268	39.2253
1c0003	ompR	Response regulators consisting of a CheY-like receiver domain and a winged-helix DNA-binding domain	76.3839	36.7053	71.6369	47.0564	105.711	52.2359	21.1747	77.9858	65.2881
1d0378	deoC	Phosphodeoxyriboaldolase {ECO:0000255	75.9829	37.5941	34.7487	48.9058	103.06	44.9287	30.2594	35.1617	34.3358
1c0127	1c0127	hypothetical protein	75.7616	92.092	65.5821	16.1375	135.386	100.07	84.1139	68.0409	63.1233
1c0294	pol4	3'-5' exodeoxyribonuclease	75.7544	97.0185	80.3244	0	151.509	71.8194	122.218	91.4548	69.194
1c0275	pncA	Amidases related to nicotinamidase	75.7208	22.9875	24.4438	97.5985	53.8431	33.6231	12.3519	23.1918	25.6957
1d0792	1d0792	hypothetical protein	75.6789	22.2637	43.4801	21.9597	129.398	27.2347	17.2926	43.3509	43.6093
1c0610	soj	ATPases involved in chromosome partitioning	75.6372	20.165	27.2109	13.8779	137.397	25.4986	14.8315	31.4552	22.9665
1c0420	birA	Biotin-[acetyl-CoA carboxylase] synthetase {ECO:0000255	75.5552	41.7408	49.7002	63.5674	87.5429	45.1258	38.3559	55.3506	44.0498
1d0491	ffh	Signal recognition particle GTPase	75.1072	48.4598	42.8803	49.7752	100.439	61.9226	34.997	41.2458	44.5148
1d0394	1d0394	hypothetical protein	74.8972	10.031	38.0509	13.7924	136.002	20.0621	0	43.3628	32.739
1d0601	opuBB	ABC-type proline/glycine betaine transport systems, permease component	74.8651	23.9105	29.2875	67.4664	82.2637	29.2683	18.5526	28.5008	30.0742
1c0365	1c0365	Uncharacterized conserved protein	74.7609	30.4555	18.2963	33.5312	115.991	47.918	12.9929	17.1615	19.4312
1c0348	1c0348	Predicted hydrolase (HD superfamily)	74.5999	20.6841	47.3073	60.8664	88.3334	13.9792	27.389	35.6022	59.0124
1c0644	1c0644	hypothetical protein	74.5021	634.805	1622.85	45.3418	103.662	560.601	709.009	1663.12	1582.58
1c0638	ptc1	Serine/threonine protein phosphatase	74.404	57.8926	59.1348	29.7857	119.022	63.8482	51.9371	55.5337	62.7358
1d0668	1d0668	hypothetical protein	74.2913	41.8658	52.8283	56.2785	92.3041	44.1621	39.5695	51.0924	54.5642
1d0174	rpiB	Ribose 5-phosphate isomerase RpiB	74.0873	39.841	56.2993	35.4412	112.733	62.405	17.277	60.4636	52.1349
1d0103	pncA	Amidases related to nicotinamidase	73.6784	36.5176	35.2299	0	147.357	49.7038	23.3314	34.2836	36.1762
1d0354	proA	Glutamyl-gamma-semialdehyde dehydrogenase {ECO:0000255	73.6482	31.7833	43.0194	17.8619	129.434	37.9467	25.6198	37.2205	48.8184
1d0002	rpsN	30S ribosomal protein S14 type Z {ECO:0000255	73.6177	34.2905	25.2854	0	147.235	41.4866	27.0945	26.4145	24.1564
1d0886	cheD	Probable chemoreceptor glutamine deamidase CheD {ECO:0000...	73.2349	42.55	44.1434	32.5565	113.913	42.371	42.7289	52.3683	35.9185
1d0441	1d0441	Lysophosphatidic acid synthase {ECO:0000255	73.1709	26.8839	72.4385	0	146.342	26.1645	27.6033	73.6837	71.1932
1c0320	1c0320	hypothetical protein	73.096	34.22	35.1218	0	146.192	53.3847	15.0553	20.085	50.1586
1c0334	nuoI	NDH-1 subunit I {ECO:0000255	73.0566	15.2016	27.4475	0	146.113	10.7174	19.6858	3.41188	51.4832
1d0719	1d0719	Glycine/sarcosine N-methyltransferase	72.8004	31.2124	31.5372	5.14207	140.459	25.9815	36.4432	25.9415	37.1329
1c0509	hipB	Predicted transcriptional regulators	72.6512	27.1356	56.3629	58.3303	86.9721	33.4918	20.7795	63.9727	48.7531
1d0289	baeS	Sensor protein atoS	72.4516	17.0893	40.2847	61.7348	83.1683	33.3615	0.817051	32.1274	48.4419
1c0160	1c0160	hypothetical protein	72.2981	25.4019	26.7668	63.6331	80.9631	34.1007	16.7031	24.8136	28.72
1d0855	1d0855	hypothetical protein	72.203	116.289	96.8775	75.038	69.3679	73.2444	159.333	91.212	102.543
1c0397	1c0397	Pantothenic acid kinase {ECO:0000255	71.8956	30.3987	40.3588	51.2392	92.552	33.6231	27.1742	39.6045	41.1132
1d0162	murI	Glutamate racemase {ECO:0000255	71.6744	25.2669	30.2044	36.3618	106.987	37.5804	12.9534	28.8016	31.6072
1d0723	rlpA	Lipoproteins	71.5127	36.9956	61.0917	7.61866	135.407	55.9928	17.9985	55.7041	66.4793
1d0199	rfaG	Glycosyltransferase	70.9976	29.3493	50.2537	0	141.995	41.5572	17.1414	54.6597	45.8478
1c0457	1c0457	hypothetical protein	70.995	24.8151	18.5701	50.9065	91.0835	46.7667	2.86339	3.10171	34.0385
1d0833	1d0833	Endo-beta-mannanase	70.9651	26.4832	30.2914	35.5537	106.377	31.3015	21.6648	29.6779	30.9048
1d0919	spoU	rRNA methylases	70.7608	52.4235	50.6092	0	141.522	55.5394	49.3075	58.0157	43.2027
1d0770	cspC	Cold shock proteins	70.6426	15.7608	33.3207	82.3487	58.9364	31.5217	0	28.0978	38.5436
1c0520	livK	ABC-type branched-chain amino acid transport systems, periplasmic component	70.2697	26.0693	24.4952	37.9964	102.543	15.2716	36.8671	23.2667	25.7237
1d0449	his2	Histidinol phosphatase and related hydrolases of the PHP family	70.2452	55.5776	68.2529	0	140.49	55.3665	55.7886	69.4965	67.0094
1c0524	purN	Folate-dependent phosphoribosylglycinamide formyltransferase PurN	70.2346	26.0218	49.6251	0	140.469	33.1181	18.9254	55.0586	44.1916
1c0535	1c0535	Predicted sugar kinase	70.2338	55.3063	47.1298	96.2914	44.1763	71.4492	39.1633	48.1995	46.06
1c0676	hypD	Hydrogenase maturation factor	69.9749	52.8164	47.1956	35.6022	104.348	45.5561	60.0766	47.9708	46.4203
1c0508	caiC	Acyl-CoA synthetases (AMP-forming)/AMP-acid ligases II	69.9605	17.2817	49.3172	26.4293	113.492	0	34.5634	43.9619	54.6724
1c0552	baeS	Signal transduction histidine kinase	69.7942	33.5151	42.1082	51.1389	88.4494	42.7856	24.2445	36.5892	47.6272
1d0779	1d0779	Pyruvate:ferredoxin oxidoreductase and related 2-oxoacid:ferredoxin oxidoreductases, delta subunit	69.7077	24.9386	7.72633	0	139.415	40.065	9.81225	10.2037	5.24893
1c0637	ftsI	Cell division protein FtsI/penicillin-binding protein 2	69.5747	115.036	97.4769	25.6573	113.492	112.453	117.619	92.234	102.72
1c0529	1c0529	hypothetical protein	69.2732	50.1433	82.9131	13.9296	124.617	76.7812	23.5055	87.5885	78.2377
1c0205	1c0205	hypothetical protein	69.2429	43.9518	38.5752	25.9246	112.561	48.8236	39.08	38.6679	38.4824
1d0229	trpC	Indole-3-glycerol phosphate synthase {ECO:0000255	69.2129	61.079	30.416	0	138.426	89.9136	32.2445	36.2911	24.5409
1d0414	nuoL	NADH:ubiquinone oxidoreductase subunit 5 (chain L)/Multisubunit Na+/H+ antiporter, MnhA subunit	69.0978	155.857	61.1388	0	138.196	91.7752	219.938	57.4529	64.8247
1d0322	pilT	Tfp pilus assembly protein, pilus retraction ATPase PilT	69.0099	37.3431	42.4981	36.7022	101.318	46.9638	27.7224	38.719	46.2771
1d0176	upp	UPRTase {ECO:0000255	68.8382	21.0273	27.4579	0	137.676	22.7809	19.2737	32.3057	22.6101
1c0335	nuoH	NDH-1 subunit H 1 {ECO:0000255	68.7048	25.6568	22.3403	49.2643	88.1453	40.2294	11.0841	26.0143	18.6663
1c0106	paaK	Coenzyme F390 synthetase	68.5266	45.5913	34.4093	4.28113	132.772	55.0617	36.1208	33.1797	35.6389
1d0874	moaA	Molybdenum cofactor biosynthesis protein A {ECO:0000255	68.455	58.9028	64.9217	32.7469	104.163	56.4072	61.3983	67.4394	62.4039
1d0683	1d0683	Predicted transcriptional regulator	68.3105	34.6442	61.7445	60.0184	76.6026	53.7592	15.5292	59.6804	63.8085
1d0766	feoB	Fe2+ transport system protein B	68.0849	39.4779	89.0168	35.9585	100.211	48.8007	30.1551	102.297	75.7371
1c0559	1c0559	hypothetical protein	67.9916	53.8959	58.24	84.3215	51.6618	42.2533	65.5386	59.9706	56.5095
1d0480	plsX	Phosphate-acyl-ACP acyltransferase {ECO:0000255	67.7915	74.3013	51.9415	0	135.583	94.6968	53.9059	60.2935	43.5896
1d0518	1d0518	Predicted nucleic-acid-binding protein implicated in transcription termination	67.2215	13.8235	22.1507	18.6657	115.777	17.1478	10.4991	21.836	22.4654
1c0347	topA	Topoisomerase IA	66.9712	39.8083	63.3634	13.6578	120.285	36.5959	43.0207	68.7368	57.99
1c0452	btuR	ATP:corrinoid adenosyltransferase	66.8931	62.4528	55.5723	32.9395	100.847	68.0869	56.8187	50.5761	60.5685
1c0360	ccmC	Cytochrome c biogenesis protein CcsA {ECO:0000255	66.8286	15.0097	25.5318	47.3406	86.3167	17.0857	12.9337	28.6795	22.384
1c0683	1c0683	hypothetical protein	66.7946	36.0056	17.039	0	133.589	46.1672	25.844	16.7969	17.2811
1d0195	lytR	Transcriptional regulator	66.7126	33.7678	30.8044	27.5848	105.84	40.1242	27.4115	30.2531	31.3557
1d0832	1d0832	hypothetical protein	66.5305	79.8864	78.0504	33.8497	99.2113	72.1896	87.5832	82.38	73.7207
1c0321	1c0321	hypothetical protein	66.4341	44.0004	33.0509	24.1888	108.679	45.3695	42.6314	35.3715	30.7302
1d0892	rpoE	DNA-directed RNA polymerase specialized sigma subunit, sigma24 homolog	66.3616	17.9734	43.1424	71.0109	61.7124	27.9584	7.98845	33.3771	52.9077
1c0545	1c0545	Uncharacterized conserved protein	66.2998	26.8112	47.2136	0	132.6	20.9584	32.6639	43.672	50.7552
1c0382	hemL	Glutamate-1-semialdehyde aminotransferase {ECO:0000255	66.1894	22.8315	22.4603	34.8079	97.5709	6.99502	38.668	38.8111	6.10947
1d0885	cheC	Chemotaxis protein CheC, inhibitor of MCP methylation	66.0306	37.4195	24.3711	0	132.061	35.7246	39.1143	44.1537	4.58852
1d0332	rnfD	Predicted NADH:ubiquinone oxidoreductase, subunit RnfD	66.0139	10.1851	21.5813	56.1375	75.8902	18.2652	2.10508	16.4181	26.7445
1c0254	aspS	Non-discriminating aspartyl-tRNA synthetase {ECO:0000255	65.9168	10.3359	27.9084	32.2378	99.5958	0	20.6718	23.8065	32.0103
1d0611	1d0611	hypothetical protein	65.567	16.8062	23.9014	36.3323	94.8017	19.818	13.7944	24.5722	23.2307
1d0065	tas	Predicted oxidoreductases (related to aryl-alcohol dehydrogenases)	65.5263	75.2667	55.3608	0	131.053	82.7544	67.779	63.9187	46.8029
1c0423	nadC	Nicotinate-nucleotide pyrophosphorylase	65.5193	33.5859	40.1271	30.7002	100.338	42.3054	24.8663	35.9145	44.3396
1d0442	gpsA	NAD(P)H-dependent glycerol-3-phosphate dehydrogenase 2 {E...	65.4849	47.0258	57.4919	0	130.97	69.3477	24.7038	65.4278	49.556
1d0144	1d0144	Predicted flavin-nucleotide-binding protein	64.7786	19.1283	19.1484	81.1553	48.4019	21.3016	16.9551	12.7151	25.5817
1c0399	sbcD	DNA repair exonuclease	64.5782	43.6413	46.1208	48.7703	80.3862	48.8773	38.4053	47.3286	44.913
1c0170	ileS	Isoleucyl-tRNA synthetase {ECO:0000255	64.4925	44.1421	38.1808	18.1416	110.843	48.1472	40.137	37.1401	39.2215
1d0381	glyS	Glycyl-tRNA synthetase beta subunit {ECO:0000255	64.3579	27.0625	10.4526	56.6445	72.0712	35.3116	18.8134	20.9051	0
1c0247	1c0247	Putative pre-16S rRNA nuclease {ECO:0000255	64.2824	20.0799	26.81	38.8869	89.6779	38.7016	1.45821	34.1188	19.5012
1d0431	gpmB	Fructose-2,6-bisphosphatase	64.2027	41.2334	42.4229	35.7238	92.6815	53.3305	29.1363	31.9965	52.8492
1d0226	vacB	Exoribonuclease R	64.1829	50.7847	53.4954	85.8194	42.5464	54.2028	47.3667	55.8842	51.1066
1d0603	1d0603	Menaquinone biosynthetic enzyme MqnA {ECO:0000255	64.0715	66.6709	167.543	0	128.143	131.076	2.26599	167.403	167.682
1d0344	ftsW	Bacterial cell division membrane protein	63.9648	42.1323	32.8525	18.8543	109.075	49.7979	34.4668	33.0849	32.6202
1c0553	1c0553	hypothetical protein	63.9288	19.0138	65.0152	0	127.858	29.7115	8.31612	118.909	11.1215
1c0147	1c0147	hypothetical protein	63.7378	15.0027	38.2707	78.8692	48.6064	21.1329	8.87249	31.716	44.8253
1c0679	1c0679	hypothetical protein	63.6414	31.5456	41.2689	17.5265	109.756	48.3037	14.7875	33.3179	49.22
1c0199	1c0199	ABC-type uncharacterized transport system, permease component	63.6072	25.9033	22.0035	50.5846	76.6297	29.0444	22.7623	22.1911	21.816
1c0707	1c0707	hypothetical protein	63.581	82.7028	37.7693	58.7896	68.3724	84.3888	81.0167	38.6858	36.8527
1c0296	argG	Citrulline--aspartate ligase {ECO:0000255	63.5648	43.927	57.9869	18.255	108.875	53.4559	34.3981	53.7225	62.2513
1d0827	1d0827	Predicted ATPase (AAA+ superfamily)	63.4812	2821.05	1621.1	49.3564	77.6059	5295.83	346.269	1546.5	1695.71
1d0348	cafA	Ribonucleases G and E	63.3787	30.1137	33.7282	15.2063	111.551	38.4167	21.8108	30.8528	36.6035
1d0177	comEB	Deoxycytidylate deaminase	63.2309	9.07019	16.5675	42.1824	84.2794	16.954	1.18634	24.6735	8.46155
1d0867	tupB	Tungstate-binding protein TupA {ECO:0000305}	63.1954	33.9609	72.7187	37.3314	89.0594	35.7246	32.1973	63.6884	81.7491
1d0086	gatC	Aspartyl/glutamyl-tRNA(Asn/Gln) amidotransferase subunit ...	63.1582	30.3621	24.9455	110.885	15.4311	21.2225	39.5016	5.40495	44.486
1d0179	1d0179	hypothetical protein	63.1392	23.8964	25.0304	0	126.278	38.3906	9.40219	8.14777	41.9131
1d0166	1d0166	hypothetical protein	63.073	25.6335	24.2126	56.9077	69.2383	33.9819	17.2851	27.8775	20.5476
1c0119	1c0119	hypothetical protein	63.055	203.02	132.145	5.7968	120.313	276.921	129.119	119.522	144.769
1c0627	mntH	Mn2+ and Fe2+ transporters of the NRAMP family	62.8875	35.5639	72.9706	0	125.775	47.4038	23.7239	73.4866	72.4545
1c0431	1c0431	MinD superfamily P-loop ATPase containing an inserted ferredoxin domain	62.8767	54.042	41.8844	60.6467	65.1066	58.8101	49.2738	36.459	47.3098
1d0531	bacA	Undecaprenyl pyrophosphate phosphatase {ECO:0000255	62.6199	90.5944	96.3761	0	125.24	102.446	78.7433	94.3284	98.4238
1d0338	1d0338	hypothetical protein	62.5326	15.9849	39.8308	50.4479	74.6174	9.26908	22.7008	36.1474	43.5141
1c0459	1c0459	hypothetical protein	62.4354	22.4218	20.1642	66.9622	57.9086	28.836	16.0076	13.4639	26.8645
1d0446	ribA	Riboflavin biosynthesis protein ribA [Includes: GTP cyclohydrolase II	61.7973	23.8628	54.7334	13.6246	109.97	35.4638	12.2617	62.0945	47.3723
1c0389	fabG	Uncharacterized oxidoreductase SSP0419	61.7538	18.674	29.9042	13.3804	110.127	23.0481	14.2999	37.6652	22.1433
1d0733	cda1	Predicted xylanase/chitin deacetylase	61.6853	36.4539	45.2806	44.4422	78.9283	61.2421	11.6657	45.4917	45.0695
1c0193	ftsI	Cell division protein FtsI/penicillin-binding protein 2	61.6822	11.3402	33.1184	0	123.364	15.6927	6.98776	36.3328	29.904
1c0594	trkG	Trk-type K+ transport systems, membrane components	61.6509	29.5126	39.0828	33.5312	89.7705	37.6499	21.3754	43.04	35.1256
1d0389	amiC	N-acetylmuramoyl-L-alanine amidase	61.5841	28.472	31.6636	13.7585	109.41	34.7591	22.1848	25.149	38.1783
1d0747	1d0747	Predicted restriction endonuclease	61.4934	25.5806	41.1948	0	122.987	24.4969	26.6644	43.7587	38.631
1c0250	fliA	RNA polymerase sigma-F factor	61.3334	27.6832	11.0525	0	122.667	33.9721	21.3944	5.15	16.955
1c0299	argD	Acetylornithine aminotransferase	61.011	53.3999	51.4689	9.30958	112.712	50.2461	56.5538	60.9203	42.0176
1d0382	1d0382	Putative pyruvate, phosphate dikinase regulatory protein ...	60.8874	20.2965	25.2833	13.7248	108.05	22.0652	18.5278	30.6065	19.9601
1c0026	rfaG	Glycosyltransferase	60.8267	67.8728	76.2705	0	121.653	75.1321	60.6134	85.4728	67.0681
1d0879	cheR	Methylase of chemotaxis methyl-accepting proteins	60.7914	22.5443	46.584	0	121.583	32.1887	12.8999	48.4417	44.7263
1d0484	fabG	Dehydrogenases with different specificities (related to short-chain alcohol dehydrogenases)	60.7574	29.5973	29.8901	29.6281	91.8867	42.5293	16.6653	33.0356	26.7445
1c0351	tatC	Sec-independent protein translocase protein TatC {ECO:000...	60.7483	10.0869	29.0272	21.9597	99.537	20.1739	0	23.5486	34.5057
1c0263	recJ	Single-stranded DNA-specific exonuclease	60.7269	69.6597	70.0747	46.3169	75.137	69.4989	69.8204	70.7774	69.3721
1c0505	porA	Pyruvate:ferredoxin oxidoreductase and related 2-oxoacid:ferredoxin oxidoreductases, alpha subunit	60.7183	37.8337	35.9325	59.6202	61.8164	42.1322	33.5352	28.1668	43.6981
1c0547	1c0547	tRNA-dihydrouridine synthase	60.7023	24.7428	35.9307	32.09	89.3146	36.8506	12.635	33.2389	38.6225
1d0079	lpd	Dihydrolipoyl dehydrogenase	60.6768	11.8228	17.8416	0	121.354	23.1727	0.472933	31.045	4.63813
1c0027	rfbX	Membrane protein involved in the export of O-antigen and teichoic acid	60.4033	34.9506	47.5264	50.4479	70.3588	45.4542	24.447	51.0718	43.9811
1d0216	1d0216	hypothetical protein	60.3007	19.8677	39.8412	0	120.601	17.8623	21.8731	34.8296	44.8528
1c0494	nagC	Transcriptional regulator/sugar kinase	60.2658	19.9847	24.6432	38.0933	82.4384	38.745	1.22439	27.4542	21.8323
1c0435	1c0435	Predicted metal-dependent membrane protease	60.2398	34.6219	32.2461	58.1034	62.3763	30.0253	39.2185	24.4274	40.0648
1d0489	smc	Chromosome partition protein Smc {ECO:0000255	59.9438	46.0971	39.5204	0	119.888	47.1093	45.0849	37.2624	41.7784
1c0140	pyrC	Dihydroorotase {ECO:0000255	59.7434	28.693	26.8234	25.9847	93.5021	42.77	14.6159	26.2817	27.3651
1c0599	1c0599	hypothetical protein	59.5113	4.36396	41.9414	4.48695	114.536	7.21362	1.51429	40.6801	43.2027
1d0047	1d0047	hypothetical protein	59.445	26.7515	42.4123	71.7912	47.0987	49.4648	4.03812	23.6207	61.2038
1c0181	pstS	ABC-type phosphate transport system, periplasmic component	59.1757	32.8597	39.7946	0	118.351	41.3028	24.4165	38.5395	41.0497
1d0007	rpmD	50S ribosomal protein L30 {ECO:0000255	59.0356	16.1723	21.8311	0	118.071	25.9815	6.3631	35.1527	8.50962
1d0785	asd	Aspartate-semialdehyde dehydrogenase	58.9165	21.6245	42.0249	11.7765	106.057	9.46645	33.7826	34.4417	49.6082
1c0437	1c0437	hypothetical protein	58.894	19.3392	27.2581	21.6849	96.103	28.7329	9.94554	28.4171	26.0992
1d0600	opuBA	ABC-type proline/glycine betaine transport systems, ATPase components	58.7085	36.1093	37.1474	57.8141	59.6028	33.1954	39.0232	34.1188	40.176
1d0836	1d0836	hypothetical protein	58.5029	52.4173	66.7271	16.5183	100.487	37.9376	66.897	68.8414	64.6129
1c0455	fepB	ABC-type Fe3+-hydroxamate transport system, periplasmic component	58.4924	24.5269	35.4677	0	116.985	31.9705	17.0833	37.9354	33
1d0481	fabH	Beta-ketoacyl-ACP synthase III {ECO:0000255	58.3331	32.9016	59.2472	28.2814	88.3847	44.1686	21.6345	56.6578	61.8366
1d0677	1d0677	hypothetical protein	58.325	43.301	48.1537	81.1553	35.4947	68.3427	18.2593	47.4696	48.8378
1d0782	pstS	ABC-type phosphate transport system, periplasmic component	58.3158	24.648	40.6404	20.0707	96.5609	18.4385	30.8576	37.6652	43.6156
1d0184	atpH	F-type ATPase subunit delta {ECO:0000255	58.2857	12.5122	18.5126	10.0353	106.536	9.21925	15.8051	24.9471	12.0782
1d0272	tpiA	Triose-phosphate isomerase {ECO:0000255	58.2336	21.9796	44.6144	20.6937	95.7734	9.50543	34.4538	40.2465	48.9822
1d0020	cbiO	ABC-type cobalt transport system, ATPase component	58.1429	7.98845	36.5527	20.2888	95.997	0	15.9769	40.5469	32.5586
1d0859	1d0859	hypothetical protein	57.9623	12.7496	19.7995	79.768	36.1566	18.3203	7.17888	13.9974	25.6016
1c0221	aroQ	Type II DHQase {ECO:0000255	57.866	20.0951	27.8168	58.3303	57.4016	40.1902	0	23.4567	32.177
1d0602	thiH	Thiamine biosynthesis enzyme ThiH and related uncharacterized enzymes	57.847	33.4673	34.0126	30.106	85.588	43.7914	23.1432	36.32	31.7052
1d0085	1d0085	hypothetical protein	57.803	40.4651	30.4846	0	115.606	8.24414	72.6861	39.3678	21.6014
1d0331	rnfC	Predicted NADH:ubiquinone oxidoreductase, subunit RnfC	57.7786	20.7958	29.7673	12.3071	103.25	25.439	16.1525	25.7953	33.7393
1c0293	mpg	Putative 3-methyladenine DNA glycosylase {ECO:0000255	57.6811	35.5225	23.7419	43.2077	72.1546	51.6022	19.4428	21.4822	26.0016
1c0454	fepD	ABC-type Fe3+-siderophore transport system, permease component	57.5997	22.3611	32.5925	27.4496	87.7497	42.8695	1.85278	26.0908	39.0942
1c0375	1c0375	hypothetical protein	57.53	23.5607	32.7357	0	115.06	30.2101	16.9113	33.4318	32.0396
1d0586	rfaG	Glycosyltransferase	57.5234	30.0426	35.8141	38.4294	76.6173	39.0869	20.9982	41.3439	30.2842
1c0537	1c0537	hypothetical protein	57.4918	47.182	39.08	79.9959	34.9876	67.3664	26.9977	48.7411	29.419
1c0326	1c0326	rRNA (pseudouridine-N3-)-methyltransferase RlmH {ECO:0000...	57.4577	71.7989	87.0146	0	114.915	66.3786	77.2192	90.6899	83.3394
1c0333	nuoJ	NADH:ubiquinone oxidoreductase subunit 6 (chain J)	57.429	14.6951	18.3297	33.5312	81.3267	23.1033	6.28689	31.0542	5.60514
1c0155	1c0155	hypothetical protein	57.2525	23.4663	46.1848	0	114.505	21.4348	25.4978	42.8922	49.4774
1c0611	gidB	16S rRNA 7-methylguanosine methyltransferase {ECO:0000255...	57.2525	105.773	141.123	0	114.505	160.979	50.5671	149.287	132.959
1c0210	recN	ATPase involved in DNA repair	57.1308	54.0037	56.4782	10.3316	103.93	52.9937	55.0138	56.6548	56.3017
1c0411	nrfG	FOG: TPR repeat	56.7547	23.52	29.7368	16.1608	97.3485	33.4048	13.6352	38.4021	21.0714
1c0536	1c0536	hypothetical protein	56.5746	49.9603	42.5657	0	113.149	60.9075	39.0131	54.4409	30.6904
1c0434	1c0434	Uncharacterized conserved protein	56.5132	52.239	37.3554	77.7738	35.2527	60.7318	43.7463	46.629	28.0818
1c0371	manB	Phosphomannomutase	56.395	61.5922	62.0891	3.63146	109.158	70.8931	52.2913	60.8031	63.3752
1d0356	1d0356	Predicted HD superfamily hydrolase involved in NAD metabolism	56.3223	25.1873	31.5796	28.8645	83.7801	28.727	21.6476	35.174	27.9853
1d0335	rnfA	Electron transport complex subunit A {ECO:0000255	56.2026	19.0271	34.369	0	112.405	16.6484	21.4059	35.1125	33.6254
1c0548	rhsA	Rhs family protein	56.1721	18.6842	21.6828	39.4346	72.9096	19.6234	17.745	16.3386	27.027
1d0418	1d0418	hypothetical protein	55.975	66.0321	60.529	39.2962	72.6537	81.2264	50.8378	56.0266	65.0314
1c0555	1c0555	Uncharacterized conserved protein	55.9175	50.8432	76.4646	23.3321	88.5028	43.9412	57.7451	77.1084	75.8207
1d0438	lytB	4-hydroxy-3-methylbut-2-enyl diphosphate reductase {ECO:0...	55.722	23.3252	36.5398	19.999	91.445	44.4006	2.24981	33.6314	39.4482
1d0483	fabD	(acyl-carrier-protein) S-malonyltransferase	55.6392	25.1916	24.8878	23.3321	87.9462	38.0467	12.3365	24.7361	25.0396
1d0433	aroA	3-deoxy-D-arabino-heptulosonate 7-phosphate (DAHP) synthase	55.5594	25.2492	41.5979	38.2047	72.9142	37.6048	12.8936	38.3088	44.887
1d0425	1d0425	Segregation and condensation protein A	55.5584	23.7974	39.9483	14.9326	96.1842	27.4365	20.1583	46.9474	32.9493
1c0657	1c0657	Predicted membrane protein	55.394	27.8703	48.167	7.29129	103.497	38.5156	17.2251	57.5754	38.7587
1d0744	mutY	A/G-specific DNA glycosylase	55.2819	33.1866	31.8273	54.7203	55.8435	34.91	31.4631	28.8954	34.7592
1d0613	1d0613	hypothetical protein	55.2061	22.4317	36.1471	12.4025	98.0098	44.8634	0	38.0861	34.2081
1c0084	livF	ABC-type branched-chain amino acid transport systems, ATPase component	55.1087	107.299	117.04	15.053	95.1643	143.475	71.123	115.564	118.517
1d0341	mreC	Cell shape-determining protein	54.9939	9.96965	12.2068	65.1129	44.8749	19.9393	0	2.64487	21.7688
1c0188	ftsW	Bacterial cell division membrane protein	54.8127	15.5454	35.0311	12.7556	96.8699	0	31.0908	36.3726	33.6896
1d0034	ntpG	Archaeal/vacuolar-type H+-ATPase subunit F	54.6933	12.4929	11.2941	67.2638	42.1227	19.3106	5.67519	20.9016	1.68659
1c0607	1c0607	hypothetical protein	54.6032	54.4687	53.881	49.8018	59.4046	78.2357	30.7018	53.017	54.7449
1c0139	carA	Carbamoyl-phosphate synthetase glutamine chain {ECO:00002...	54.4889	30.5603	37.4313	0	108.978	31.1231	29.9975	38.034	36.8285
1d0714	tlyC	Hemolysins and related proteins containing CBS domains	54.1621	58.1285	61.6738	34.5661	73.7581	86.4447	29.8123	64.0253	59.3222
1d0056	1d0056	Type I site-specific restriction-modification system, R (restriction) subunit and related helicases	54.1257	36.5937	38.1972	31.3245	76.927	51.6296	21.5579	36.1059	40.2884
1d0614	uvrD	Superfamily I DNA and RNA helicases	53.9855	23.2864	33.5612	23.4298	84.5413	32.7351	13.8377	40.6856	26.4368
1d0445	ribC	Riboflavin synthase alpha chain	53.7317	19.3106	30.4339	25.2239	82.2396	38.6212	0	31.3524	29.5154
1c0403	1c0403	hypothetical protein	53.5717	7.72486	33.5337	27.3157	79.8277	4.18239	11.2673	29.6251	37.4423
1c0660	purR	Purine nucleotide synthesis repressor {ECO:0000255	53.4247	39.1223	54.7487	11.1437	95.7057	56.3062	21.9384	49.7014	59.796
1c0090	porG	Pyruvate:ferredoxin oxidoreductase and related 2-oxoacid:ferredoxin oxidoreductases, gamma subunit	53.3668	27.4196	17.659	0	106.734	35.3563	19.4829	21.8079	13.5101
1d0533	1d0533	Uncharacterized protein conserved in bacteria	53.1174	26.0962	32.1542	28.6065	77.6284	34.4927	17.6996	33.4652	30.8433
1d0241	1d0241	Signal transduction histidine kinase	53.0593	27.1699	22.6791	19.6896	86.429	36.1768	18.163	19.2908	26.0675
1c0190	rfe	UDP-MurNAc-pentapeptide phosphotransferase {ECO:0000255	52.7326	19.6233	11.8523	36.9096	68.5556	33.9081	5.33853	21.5893	2.11539
1d0027	acpS	4'-phosphopantetheinyl transferase AcpS {ECO:0000255	52.7275	33.0338	26.4358	33.9377	71.5174	57.1593	8.90833	25.6408	27.2308
1c0192	murE	UDP-N-acetylmuramyl tripeptide synthase	52.7066	4.38357	37.6846	11.5697	93.8436	4.42867	4.33847	35.5286	39.8405
1c0088	livK	ABC-type branched-chain amino acid transport systems, periplasmic component	52.6867	17.3204	19.8852	26.7289	78.6444	27.6247	7.01611	19.2173	20.5531
1d0152	1d0152	hypothetical protein	52.6653	14.913	31.3135	39.1588	66.1718	22.484	7.34203	35.7889	26.838
1c0493	1c0493	Uncharacterized Fe-S center protein	52.3525	27.855	35.3833	0	104.705	32.4418	23.2683	28.7704	41.9961
1c0578	1c0578	Predicted permeases	52.3218	0	16.5735	62.9825	41.6612	0	0	20.5131	12.6339
1c0209	1c0209	Uncharacterized membrane-anchored protein conserved in bacteria	52.135	7.86029	42.0364	14.9725	89.2976	0	15.7206	48.5326	35.5402
1c0087	livH	Branched-chain amino acid ABC-type transport system, permease components	52.0148	1.77951	23.9734	63.2736	40.756	0	3.55902	26.3698	21.5769
1c0273	folD	Methenyltetrahydrofolate cyclohydrolase {ECO:0000255	51.8334	27.1434	31.701	13.1913	90.4756	42.4151	11.8718	32.3104	31.0917
1d0759	mglA	ABC-type sugar transport system, ATPase component	51.5967	21.8163	47.1527	90.9044	12.289	0	43.6327	38.9929	55.3126
1c0564	1c0564	Adenine-specific DNA methylase containing a Zn-ribbon	51.5922	20.7724	38.9131	0	103.184	0	41.5449	44.6112	33.215
1c0220	pepP	Xaa-Pro aminopeptidase	51.3568	19.0329	30.2614	0	102.714	17.7636	20.3021	26.3902	34.1325
1d0182	1d0182	ATP synthase C chain	51.2678	9.78511	23.8853	0	102.536	11.2814	8.28877	30.5273	17.2432
1d0205	1d0205	Predicted permeases	51.2657	9.35564	12.62	24.6412	77.8903	0	18.7113	8.55784	16.6822
1c0118	1c0118	hypothetical protein	50.9583	193.617	105.596	0	101.917	280.765	106.47	105.72	105.471
1c0461	1c0461	hypothetical protein	50.9254	16.04	28.2298	14.1407	87.71	12.9908	19.0893	21.7119	34.7476
1d0180	1d0180	hypothetical protein	50.8518	10.5851	32.7144	0	101.704	21.1701	0	35.3824	30.0463
1d0488	rnc	Ribonuclease III {ECO:0000255	50.5542	32.7077	46.8382	31.2397	69.8688	62.7796	2.63576	45.111	48.5654
1d0701	gph	Putative pyrophosphatase PpaX {ECO:0000255	50.2603	22.1122	36.0932	0	100.521	39.7945	4.43	37.4299	34.7566
1d0451	1d0451	hypothetical protein	50.2111	15.365	40.6798	23.1393	77.283	17.7147	13.0154	55.8307	25.5289
1c0609	spo0J	Predicted transcriptional regulators	50.1984	29.7917	27.346	12.8729	87.5239	45.826	13.7575	23.0596	31.6323
1d0608	ssnA	5-methylthioadenosine/S-adenosylhomocysteine deaminase {E...	50.1559	73.9837	88.5675	17.2034	83.1085	90.8754	57.0919	83.9605	93.1745
1d0578	azlC	Predicted branched-chain amino acid permease (azaleucine resistance)	50.1121	49.1168	52.2535	55.1308	45.0934	37.9856	60.248	39.7332	64.7737
1c0322	thrB	Homoserine kinase	49.788	33.6423	27.2793	36.4802	63.0959	46.0812	21.2034	27.1172	27.4415
1c0065	1c0065	Predicted membrane protein	49.6983	45.0926	42.4449	0	99.3967	55.5007	34.6846	41.4299	43.4599
1d0008	rplO	50S ribosomal protein L15 {ECO:0000255	49.3114	5.02036	18.53	0	98.6229	8.63144	1.40928	21.9826	15.0775
1c0447	livM	ABC-type branched-chain amino acid transport system, permease component	49.2864	12.9926	22.2176	18.6192	79.9536	16.036	9.94928	17.3572	27.078
1c0298	argF	Ornithine carbamoyltransferase {ECO:0000255	49.1564	51.5965	77.5067	11.9652	86.3477	76.9453	26.2478	86.6092	68.4043
1d0816	1d0816	hypothetical protein	49.0421	19.2877	21.8907	42.4221	55.6621	19.4861	19.0893	31.0171	12.7644
1c0110	corA	Mg2+ and Co2+ transporters	48.9986	16.1737	27.217	46.6643	51.3329	13.099	19.2484	28.4323	26.0016
1d0406	lytB	N-acetylmuramoyl-L-alanine amidase cwlB precursor	48.748	31.5785	32.7766	14.5826	82.9134	40.1902	22.9668	38.739	26.8142
1c0112	zntA	Cadmium efflux ATPase	48.4946	26.0991	32.0176	30.1945	66.7946	30.8913	21.307	37.3299	26.7052
1d0876	1d0876	Uncharacterized protein conserved in bacteria	48.3685	31.4062	28.4953	0	96.737	26.6087	36.2038	27.295	29.6957
1c0280	1c0280	Probable transcriptional regulatory protein Rxyl_1318 {EC...	48.2113	22.5787	40.4109	0	96.4226	25.3166	19.8408	34.3874	46.4344
1d0788	1d0788	Predicted membrane protein	48.1913	36.9038	39.1533	9.92857	86.454	59.2876	14.52	38.4744	39.8323
1c0424	nadB	L-aspartate oxidase	47.9985	43.3963	35.9664	0	95.997	59.0232	27.7694	40.0525	31.8803
1d0088	gatB	Aspartyl/glutamyl-tRNA(Asn/Gln) amidotransferase subunit ...	47.9397	18.8112	25.5546	22.7169	73.1624	27.826	9.79633	21.8692	29.24
1c0185	murB	UDP-N-acetylmuramate dehydrogenase {ECO:0000255	47.8997	19.0749	62.7961	13.1913	82.6081	15.1482	23.0016	60.7628	64.8295
1d0612	1d0612	hypothetical protein	47.8814	30.8964	35.9803	29.3179	66.4449	38.1561	23.6367	41.0854	30.8752
1c0680	cbiO	Putative ABC transporter ATP-binding protein SCO3161	47.7004	32.304	37.6884	75.5697	19.831	41.6546	22.9535	27.6265	47.7504
1c0214	1c0214	hypothetical protein	47.4794	12.7643	30.0772	41.7889	53.1698	22.3945	3.13406	33.6095	26.5449
1d0281	1d0281	Aspartate/tyrosine/aromatic aminotransferase	47.361	8.92965	25.6046	38.486	56.236	0	17.8593	27.084	24.1252
1d0385	dgt	Deoxyguanosinetriphosphate triphosphohydrolase-like protein	46.7856	29.1803	31.9938	16.3257	77.2454	39.9949	18.3658	33.4225	30.5652
1c0001	1c0001	Bacteriophage protein gp37	46.3698	30.8576	23.6241	7.74511	84.9945	35.5764	26.1389	31.712	15.5362
1d0415	nuoM	NADH-quinone oxidoreductase chain M	46.1237	13.5622	13.4643	45.8054	46.442	3.50671	23.6176	25.3972	1.53138
1c0073	glnS	Glutamyl-tRNA synthetase 2 {ECO:0000255	46.0952	17.5832	38.4617	0	92.1904	35.1664	0	30.1205	46.8029
1d0798	1d0798	hypothetical protein	46.0952	40.0878	27.6939	0	92.1904	70.3328	9.84291	31.9863	23.4015
1c0418	1c0418	hypothetical protein	45.9844	31.2484	46.8012	50.4479	41.521	31.2832	31.2136	57.172	36.4304
1c0111	zntA	Probable cadmium-transporting ATPase	45.944	34.1184	46.4844	40.6407	51.2473	47.3365	20.9002	49.8781	43.0907
1c0446	livG	ABC-type branched-chain amino acid transport systems, ATPase component	45.7786	15.4852	20.7298	21.2917	70.2655	30.9704	0	18.681	22.7786
1d0051	hsdM	Type I restriction-modification system methyltransferase subunit	45.5835	21.3957	23.9368	10.7069	80.46	31.148	11.6434	43.5781	4.29549
1d0280	1d0280	Fe-S oxidoreductase	45.5762	48.939	41.6997	8.84631	82.3061	41.6505	56.2274	50.1271	33.2722
1d0147	1d0147	Protease HtpX homolog {ECO:0000255	45.5657	39.4063	43.7577	11.4514	79.68	53.4773	25.3353	51.9108	35.6047
1c0251	rsbW	Anti-sigma regulatory factor (Ser/Thr protein kinase)	45.4721	88.9477	145.871	70.7034	20.2408	142.898	34.997	149.916	141.827
1d0170	1d0170	Predicted metal-dependent enzyme	45.3764	13.8108	28.9962	28.1959	62.5569	16.837	10.7846	18.9663	39.026
1d0803	srtA	Sortase (surface protein transpeptidase)	44.7428	54.1483	76.8386	0	89.4856	38.9723	69.3243	75.7469	77.9302
1d0815	rsbU	Protein icfG	44.5673	31.7456	64.9827	0	89.1347	0	63.4912	57.8636	72.1018
1d0370	miaB	2-methylthioadenine synthetase	44.5487	32.7821	27.5749	26.4494	62.6481	46.8614	18.7029	25.9689	29.1808
1d0873	mobB	Molybdopterin-guanine dinucleotide biosynthesis protein	44.5089	28.1996	27.9599	21.0912	67.9267	31.4861	24.9131	23.1314	32.7885
1d0848	1d0848	hypothetical protein	44.4987	17.9649	37.5194	31.4591	57.5384	26.4924	9.4374	32.9687	42.07
1c0103	gcvT	Glycine cleavage system T protein {ECO:0000255	44.4442	20.2558	25.603	25.361	63.5274	27.9584	12.5533	23.7348	27.4713
1c0489	tatD	Mg-dependent DNase	44.4384	4.04308	26.9374	7.07034	81.8065	6.49538	1.59077	19.1272	34.7476
1d0427	rsuA	Ribosomal large subunit pseudouridine synthase B	44.3591	10.4923	44.0196	0	88.7182	3.28502	17.6996	31.3736	56.6656
1d0846	1d0846	Transposase and inactivated derivatives	44.2939	25.7699	43.5295	33.9377	54.6501	31.1778	20.3619	45.0781	41.9808
1d0218	prfB	Peptide chain release factor 2 {ECO:0000255	43.766	33.1147	18.8608	0	87.532	41.8515	24.3779	19.445	18.2766
1c0490	metG	Methionyl-tRNA synthetase	43.7075	30.4611	33.3313	7.19295	80.2221	51.2121	9.71016	39.9696	26.693
1d0410	nuoD	NDH-1 subunit D {ECO:0000255	43.5617	19.4005	33.7047	0	87.1234	0	38.801	30.7811	36.6284
1d0314	hemY	Protoporphyrinogen oxidase	43.4361	27.7611	46.3802	18.7784	68.0937	29.3272	26.195	55.4687	37.2917
1c0316	mipB	Transaldolase	43.3966	7.73943	23.1692	25.3381	61.455	13.5786	1.90029	23.4663	22.872
1d0812	marR	Transcriptional regulators	43.3262	31.7327	108.351	0	86.6524	50.9799	12.4854	100.328	116.375
1c0137	carB	Carbamoylphosphate synthase large subunit (split gene in MJ)	43.287	24.8553	30.2317	0	86.5741	33.498	16.2126	27.5489	32.9144
1c0256	1c0256	Long-chain-fatty-acid--luciferin-component ligase	43.1972	23.4851	32.0203	11.8638	74.5307	34.5136	12.4566	31.5165	32.5241
1c0121	1c0121	hypothetical protein	43.1382	36.0347	25.2499	0	86.2763	58.9456	13.1239	34.1188	16.381
1d0411	nuoH	NDH-1 subunit H {ECO:0000255	42.7622	25.2257	36.5137	11.7765	73.748	37.8658	12.5857	27.5533	45.4741
1c0577	trxA	Thiol-disulfide isomerase and thioredoxins	42.6056	11.8274	17.5723	0	85.2112	15.8776	7.77712	23.5883	11.5563
1d0849	1d0849	hypothetical protein	42.5652	39.6926	35.5142	0	85.1303	31.5217	47.8636	31.1083	39.9201
1c0156	1c0156	hypothetical protein	42.4093	17.379	44.4497	0	84.8185	23.3303	11.4276	41.7781	47.1213
1d0626	1d0626	ACT domain-containing protein	42.3516	20.779	25.4748	0	84.7033	23.2986	18.2593	32.6353	18.3142
1d0500	1d0500	Predicted ATPase with chaperone activity	42.2622	49.312	74.799	18.8543	65.6701	93.5335	5.09048	87.9506	61.6475
1d0727	aro8	Transcriptional regulators containing a DNA-binding HTH domain and an aminotransferase domain (MocR family) and their eukaryotic orthologs	42.2608	33.9679	16.0366	26.8571	57.6644	47.2901	20.6457	32.0733	0
1d0151	1d0151	Predicted membrane protein	42.2077	34.3469	60.8995	24.0848	60.3306	47.0182	21.6756	58.9924	62.8065
1c0361	1c0361	hypothetical protein	41.5823	21.6475	17.8947	28.7903	54.3743	31.9593	11.3358	18.9451	16.8442
1d0183	1d0183	F-type ATPase subunit b {ECO:0000255	41.33	15.3238	37.0362	0	82.66	23.1033	7.54427	35.9575	38.115
1d0656	1d0656	Predicted membrane protein	41.1566	43.5898	64.5822	13.806	68.5073	55.8065	31.3731	68.2375	60.9269
1d0169	thy1	Thymidylate synthase ThyX {ECO:0000255	41.0877	29.0863	37.4835	24.5601	57.6152	52.6468	5.52585	41.3017	33.6653
1d0298	ubiA	4-hydroxybenzoate polyprenyltransferase and related prenyltransferases	40.9939	22.298	27.032	17.0204	64.9674	27.3635	17.2326	24.4743	29.5897
1c0357	ubiE	Demethylmenaquinone methyltransferase {ECO:0000255	40.8606	30.9985	28.7876	0	81.7212	32.112	29.8851	33.7354	23.8397
1d0193	wbbJ	Acetyltransferase (isoleucine patch superfamily)	40.7489	21.6086	24.2741	0	81.4978	21.0303	22.1868	25.235	23.3132
1d0011	map	Methionine aminopeptidase	40.6848	22.6631	24.4952	0	81.3696	30.99	14.3361	21.9237	27.0668
1d0585	1d0585	hypothetical protein	40.615	55.0617	62.2895	34.249	46.9809	110.123	0	57.595	66.984
1d0041	1d0041	Inactive homolog of metal-dependent proteases, putative molecular chaperone	40.5465	14.8444	12.4888	54.8991	26.194	17.3369	12.3519	5.01747	19.9601
1c0659	argE	Probable succinyl-diaminopimelate desuccinylase	40.3108	35.7985	28.6273	14.8929	65.7287	60.4278	11.1693	17.4223	39.8323
1c0701	acrR	Transcriptional regulator	40.2432	48.723	45.5386	9.19493	71.2914	61.2421	36.2038	47.7327	43.3446
1d0769	1d0769	Predicted metal-dependent hydrolase of the TIM-barrel fold	40.0908	37.3821	25.8473	23.1393	57.0422	49.6011	25.1632	31.581	20.1137
1c0666	1c0666	Uncharacterized conserved protein	40.0726	32.108	55.9824	21.8739	58.2713	51.9123	12.3036	60.7741	51.1907
1d0055	1d0055	hypothetical protein	40.0072	21.5991	17.8452	0	80.0143	26.7934	16.4049	23.9898	11.7007
1d0643	salX	Lipoprotein-releasing system ATP-binding protein LolD {EC...	39.9859	29.2107	45.3484	0	79.9717	48.9937	9.42777	47.9055	42.7912
1d0853	1d0853	Uncharacterized protein conserved in bacteria	39.7587	20.7012	62.5348	0	79.5174	7.65527	33.7471	68.2375	56.8321
1d0311	hemE	Uroporphyrinogen decarboxylase {ECO:0000255	39.675	0	32.845	31.1095	48.2405	0	0	30.3278	35.3622
1d0333	rnfG	Predicted NADH:ubiquinone oxidoreductase, subunit RnfG	39.5947	19.2342	14.4031	0	79.1894	28.727	9.74144	13.3661	15.4401
1d0293	rsbU	Serine phosphatase RsbU, regulator of sigma subunit	39.582	53.1164	45.8217	0	79.1639	60.97	45.2628	50.0409	41.6026
1c0104	dacC	D-alanyl-D-alanine carboxypeptidase	39.5303	23.0604	24.7374	0	79.0606	30.2213	15.8994	26.0122	23.4626
1d0835	selD	Selenophosphate synthase {ECO:0000255	39.4379	56.7588	92.5858	35.3294	43.5464	44.6276	68.89	91.2704	93.9011
[truncated: 170 more rows]

## Sheet: Table S6
Table S6. TMM normalized read counts of Methanothermobacter sp. strain EMTCatA1 transcriptomes sorted by FDR. FDR threshold for differential expression (< 0.05) is marked with a double line. *Mean value of biological replicates.
[truncated: 1,816 more rows]

[truncated: 5 more sheets: Table S7, Table S8, Table S9, Table S10, Table S11]
